# Supplementary material for: N-heterocyclic nitrenium charge transfer catalysis via inner-sphere electron transfer in concert with halogen-atom dissociation
Source: Royal Society of Chemistry journal article supplement (doi:10.1039/d3qo01779f), 2023-11-28
Supplement: d3qo01779f1.pdf [file d3qo01779f1.pdf]

## Supporting Information

### N-Heterocyclic Nitrenium Charge Transfer Catalysis via Inner-Sphere Electron Transfer Concerted with Halogen-Atom Dissociation

Chao-Shen Zhang,<sup>1,†</sup> Chang-Zhen Fang,<sup>1,†</sup> Liang Yi,<sup>3,†</sup> Chen Zhu,<sup>3</sup> Zhi-Xiang Wang,<sup>1,2\*</sup> Xiang-Yu Chen<sup>1,2\*</sup> Magnus Rueping<sup>3,\*</sup>

<sup>1</sup>School of Chemical Sciences, University of Chinese Academy of Sciences (UCAS),  
Beijing 100049, China.

<sup>2</sup>Binzhou Institute of Technology, Weiqiao-UCAS Science and Technology Park,  
Binzhou, Shandong Province 256606, China.

<sup>3</sup>KAUST Catalysis Center (KCC), King Abdullah University of Science and  
Technology (KAUST), Thuwal 23955-6900, Saudi Arabia.

†These authors contributed equally to this work.

\*E-mail: zxwang@ucas.ac.cn; chenxiangyu20@ucas.ac.cn;  
magnus.rueping@kaust.edu.sa.

## Table of contents

|                                                                                  |     |
|----------------------------------------------------------------------------------|-----|
| 1. General Information.....                                                      | 3   |
| 2. Synthesis of N-Heterocyclic Nitrenium Salts.....                              | 5   |
| 3. General Procedure for the Optimization of the Reaction Conditions .....       | 7   |
| 4. UV/vis Absorption Spectra Experiments.....                                    | 10  |
| 5. Determination of the Binding Ratio by Job's Plot .....                        | 12  |
| 6. Quantum yield determination.....                                              | 15  |
| 7. EPR Spectroscopy Experiments .....                                            | 16  |
| 8. Radical Trapping Experiments .....                                            | 17  |
| 9. Deuterium incorporation experiments.....                                      | 18  |
| 10. Cyclic Voltammetry Analysis.....                                             | 20  |
| 11. Evaluation of Excited State Potential and Lifetime of the Photocatalyst..... | 23  |
| 12. Stern-Volmer Luminescence Quenching Studies .....                            | 25  |
| 13. Compound Characterization Data.....                                          | 28  |
| 14. NMR Spectrum.....                                                            | 47  |
| 15. Computational Details .....                                                  | 129 |
| 16. References .....                                                             | 162 |

## 1. General Information

Chemicals were purchased from Heowns, Innochem or Bidepharm and used without further purification unless otherwise noted. Solvents were purified using a solvent-purification system (VSPS-8, Vigor) that contained activated alumina and molecular sieves. N-methacryloyl-N-methylbenzamide<sup>1</sup>, N-arylacrylamides<sup>2</sup>, phenylcinnamamide<sup>3</sup>, enamides<sup>4</sup>, nitrenium salt<sup>5,6</sup> were prepared according to literature methods.

Analytical thin layer chromatography was carried out with silica gel pre-coated glass plates (TLC-Silica gel GF254, coating thickness: 0.25 mm) purchased from Xinnuo Chemical (Yantai, China). Chromatographic purification of the products was performed on silica gel 200-300 mesh. Visualization of the developed TLC plates was performed with ultraviolet irradiation (254 nm) or by staining with basic potassium permanganate solution.

High-resolution mass spectra (HRMS) were obtained with the mass analyzer of an orbitrap. The calculated values are based on the most abundant isotope.

IR spectra were taken on a Vertex 70 spectrophotometer and reported as wave numbers ( $\text{cm}^{-1}$ ).

The WRS-2 microcomputer melting point meter was used to measure the melting point of solids.

The GC-MS TQ8040 was used in the detection of the reaction mixture.

UV-vis absorption spectra were acquired on UV-1900 spectrophotometer (Shimadzu, Japan).

Fluorescence spectra were recorded on a Edingburg FS5 Fluorescent Spectrophotometer.

The luminescence decays were measured on an Edingburg FLS980 spectrometer.

Cyclic voltammetry studies were carried out on a Shanghai Chen Hua CHI660E electrochemical workstation.

EPR spectra were recorded at room temperature, using a Bruker EMXplus spectrometer.

<sup>1</sup>H- and <sup>13</sup>C- NMR spectra were recorded at ambient temperature on a Shimadzu Avance 400/500 Spectrometer.

The chemical shifts are reported in ppm downfield of tetramethylsilane (TMS) and referenced to residual solvent peaks resonance as internal standard. The order of citation in parentheses is a) multiplicity (s = singlet, d = doublet, t = triplet, q = quartet, dd = doublet of doublet, ddd = doublet of doublet of doublet, td = triplet of doublet, m = multiplet, bs = broad signal), b) coupling constants, c) number of protons. Coupling constants (*J*) are reported in Hertz (Hz).

Photochemical experiments were performed magnetically stirred in 10 mL glass tubes, sealed with a rubber septum. The tubes were irradiated with blue light (450 nm,) using a LED lamp with a power output of 100 W (see below pictures). The distance from the light source to the irradiation vessel is 2.0 cm to keep the reaction temperature at  $50 \pm 5$  °C.

(The purchase link of LED lamp is <https://item.taobao.com/item.htm?spm=a1z10.5-c-s.w4002-21207510047.14.dbef5298YBVk03&id=522759747619>).

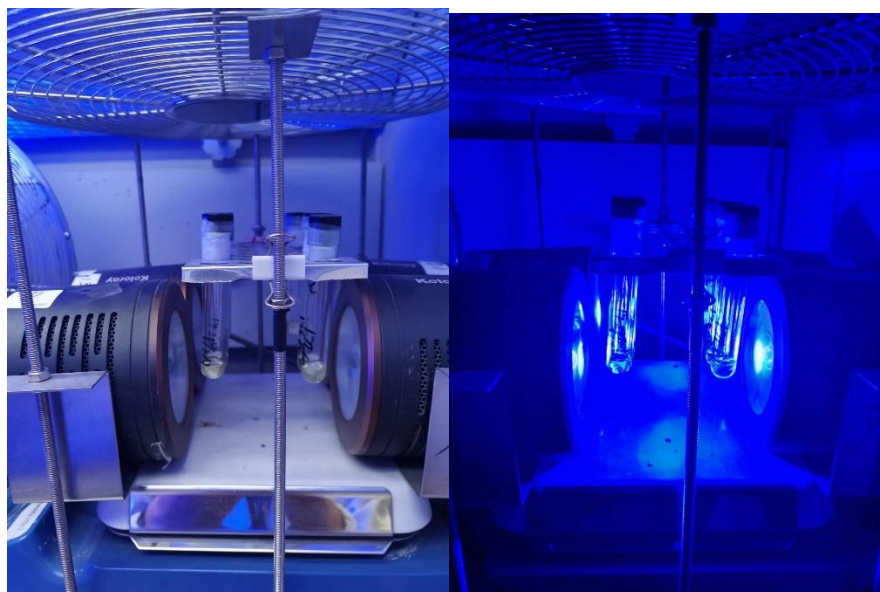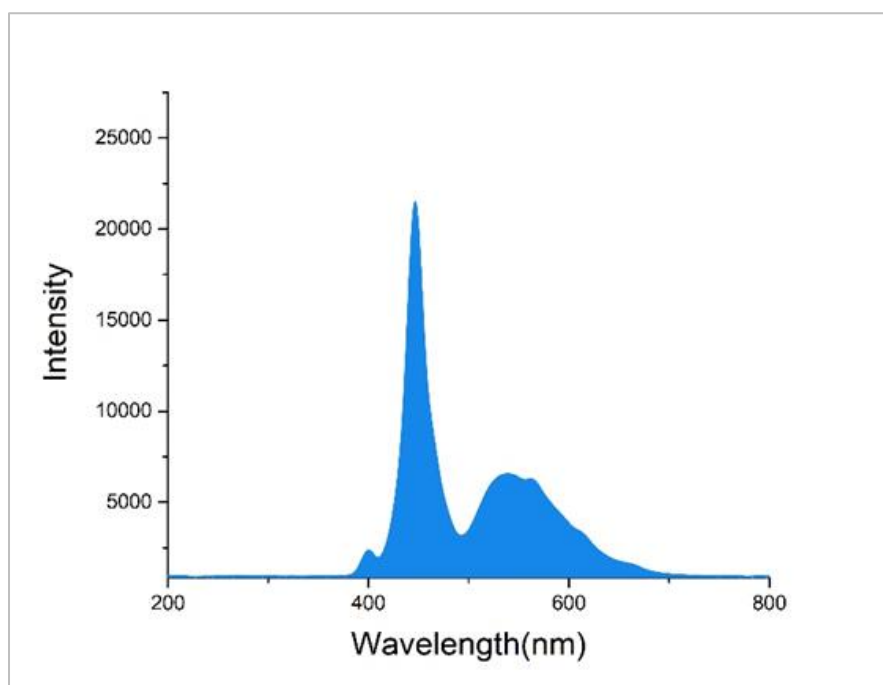

**Figure S1.** The spectrum of blue LEDs employed in the reaction



## 2. Synthesis of N-Heterocyclic Nitrenium Salts

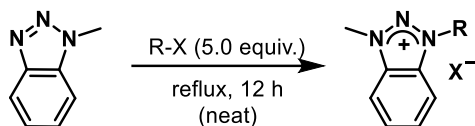

The preparation of nitrenium salt **A-C** was performed according to previously reported procedure<sup>5</sup>. 1-methylbenzotriazole (266.0 mg, 2.0 mmol, 1.0 equiv.) was dissolved in methylating reagent (R-X, 10.0 mmol, 5.0 equiv.) which was warmed to reflux for 12 h. After cooling to room temperature, removal of alkyl iodide and recrystallization of the crude crystals from ethanol led to nitrenium salt.

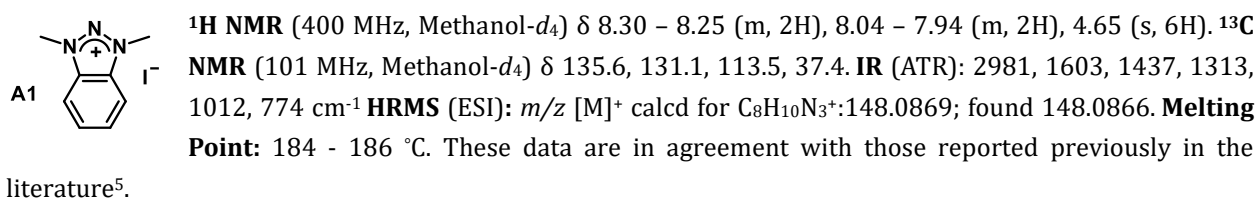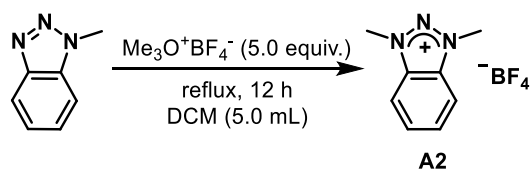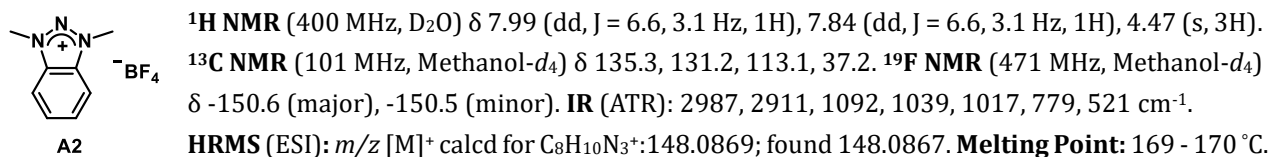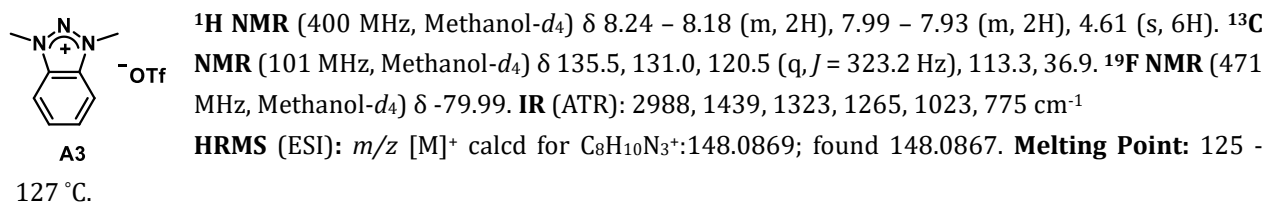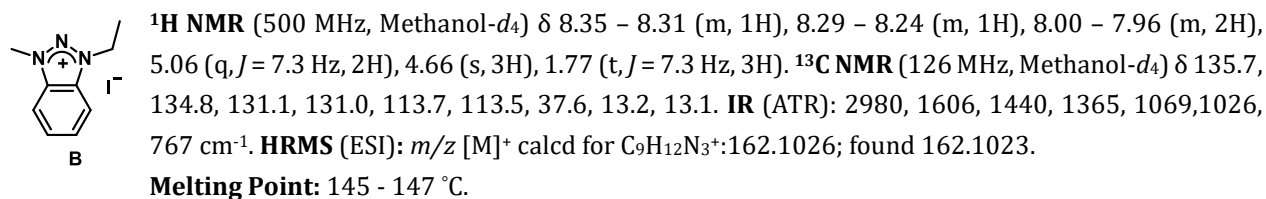

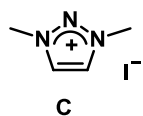

**<sup>1</sup>H NMR** (500 MHz, Methanol-*d*<sub>4</sub>) δ 8.74 (s, 2H), 4.38 (s, 6H). **<sup>13</sup>C NMR** (126 MHz, Methanol-*d*<sub>4</sub>) δ 131.5, 39.8. **IR** (ATR): 3156, 1537, 1289, 1210, 1099, 750, 665 cm<sup>-1</sup>. **HRMS** (ESI): *m/z* [M]<sup>+</sup> calcd for C<sub>4</sub>H<sub>8</sub>N<sub>3</sub><sup>+</sup>: 98.0713; found 98.0716. **Melting Point**: 194 - 196 °C.

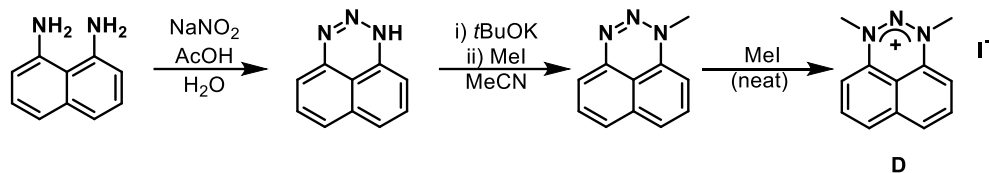

The preparation of nitrenium salt **D** was performed according to previously reported procedure<sup>6</sup>.

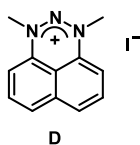

**<sup>1</sup>H NMR** (500 MHz, Methanol-*d*<sub>4</sub>) δ 7.67 (dd, *J* = 8.5, 0.7 Hz, 2H), 7.5 (dd, *J* = 8.6, 7.7 Hz, 2H), 7.10 (dd, *J* = 7.7, 0.7 Hz, 2H), 3.94 (s, 6H). **<sup>13</sup>C NMR** (126 MHz, Methanol-*d*<sub>4</sub>) δ 133.9, 131.3, 128.9, 126.1, 122.3, 107.9, 43.5. **IR** (ATR): 3472, 1639, 1599, 1527, 1459, 1391, 984, 819, 698 cm<sup>-1</sup>. **HRMS** (ESI): *m/z* [M]<sup>+</sup> calcd for C<sub>12</sub>H<sub>12</sub>N<sub>3</sub><sup>+</sup>: 198.1026; found 198.1023.

**Melting Point**: 201 - 203 °C.

### 3. General Procedure for the Optimization of the Reaction Conditions

Table S1. Optimization of the reaction conditions for activation of chloroform<sup>a</sup>

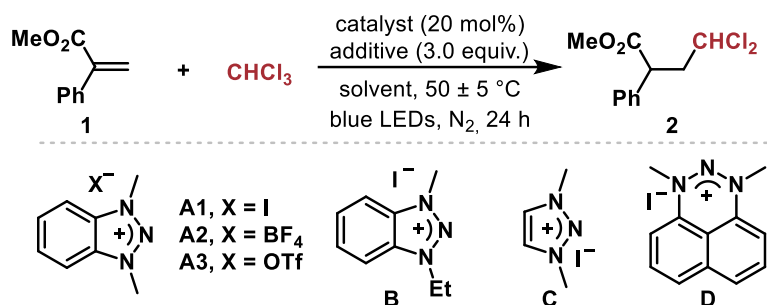

| Entry | Catalyst | Additive                                                                            | Solvent            | Yield (%) <sup>b</sup> |
|-------|----------|-------------------------------------------------------------------------------------|--------------------|------------------------|
| 1     | A1       | TMEDA                                                                               | CH <sub>3</sub> CN | 69 (62) <sup>c</sup>   |
| 2     | A2       | TMEDA                                                                               | CH <sub>3</sub> CN | 38                     |
| 3     | A3       | TMEDA                                                                               | CH <sub>3</sub> CN | 44                     |
| 4     | B        | TMEDA                                                                               | CH <sub>3</sub> CN | 38                     |
| 5     | C        | TMEDA                                                                               | CH <sub>3</sub> CN | 24                     |
| 6     | D        | TMEDA                                                                               | CH <sub>3</sub> CN | 52                     |
| 7     | A1       | TMEDA                                                                               | DMSO               | 52                     |
| 8     | A1       | TMEDA                                                                               | DMA                | 50                     |
| 9     | A1       | TMEDA                                                                               | DMF                | 48                     |
| 10    | A1       | TMEDA                                                                               | DCM                | 61                     |
| 11    | A1       | TMEDA                                                                               | THF                | 30                     |
| 12    | A1       | TMEDA                                                                               | Acetone            | 56                     |
| 13    | A1       | TMEDA                                                                               | Toluene            | 28                     |
| 14    | A1       | DMAP                                                                                | CH <sub>3</sub> CN | 26                     |
| 15    | A1       | Quinuclidine                                                                        | CH <sub>3</sub> CN | 14                     |
| 16    | A1       | DABCO                                                                               | CH <sub>3</sub> CN | 21                     |
| 17    | A1       | DIPEA                                                                               | CH <sub>3</sub> CN | 50                     |
| 18    | A1       | DBU                                                                                 | CH <sub>3</sub> CN | 44                     |
| 19    | A1       | NEt <sub>3</sub>                                                                    | CH <sub>3</sub> CN | 34                     |
| 20    | A1       | PMPPH <sub>2</sub> N                                                                | CH <sub>3</sub> CN | NR                     |
| 21    | A1       |  | CH <sub>3</sub> CN | NR                     |
| 22    | A1       | CyNMe <sub>2</sub>                                                                  | CH <sub>3</sub> CN | 26                     |
| 23    | A1       | NaOAc                                                                               | CH <sub>3</sub> CN | NR                     |

|                 |     |                                |                    |    |
|-----------------|-----|--------------------------------|--------------------|----|
| 24              | A1  | K <sub>2</sub> CO <sub>3</sub> | CH <sub>3</sub> CN | NR |
| 25              | A1  | NaHCO <sub>3</sub>             | CH <sub>3</sub> CN | NR |
| 26              | A1  | ---                            | CH <sub>3</sub> CN | NR |
| 27              | --- | TMEDA                          | CH <sub>3</sub> CN | NR |
| 28              | --- | ---                            | CH <sub>3</sub> CN | NR |
| 29 <sup>d</sup> | A1  | TMEDA                          | CH <sub>3</sub> CN | NR |
| 30 <sup>e</sup> | A1  | TMEDA                          | CH <sub>3</sub> CN | 58 |
| 31 <sup>f</sup> | A1  | TMEDA                          | CH <sub>3</sub> CN | 64 |
| 32 <sup>g</sup> | A1  | TMEDA                          | CH <sub>3</sub> CN | 44 |
| 33 <sup>h</sup> | A1  | TMEDA                          | CH <sub>3</sub> CN | 14 |
| 34 <sup>i</sup> | A1  | TMEDA                          | ---                | 62 |
| 35 <sup>j</sup> | A1  | TMEDA                          | CH <sub>3</sub> CN | 51 |

<sup>a</sup> Reaction carried out with **1** (0.1 mmol), CHCl<sub>3</sub> (0.1 mL), catalyst (20 mol%), additive (0.3 mmol) and solvent (0.25 mL). <sup>b</sup> Yields were determined by <sup>1</sup>H NMR analysis of the crude reaction mixture using 1,1,2,2-tetrachloroethane as an internal standard. <sup>c</sup> Reactions were performed on a 0.2 mmol scale with yield of isolated product given. <sup>d</sup> No irradiation, 60 °C. <sup>e</sup> CHCl<sub>3</sub> (0.2 mL). <sup>f</sup> CHCl<sub>3</sub> (0.15 mL). <sup>g</sup> CHCl<sub>3</sub> (0.05 mL). <sup>h</sup> CHCl<sub>3</sub> (2.0 equiv.). <sup>i</sup> CHCl<sub>3</sub> (0.5 mL). <sup>j</sup> catalyst (10 mol%). NR, No Reaction. DIPEA = N,N-Diisopropylethylamine. DMAP = 4-dimethylaminopyridine. TMEDA = N,N,N',N'-Tetramethylethylenediamine. DBU = 1,8-Diazabicyclo[5.4.0]undec-7-ene.

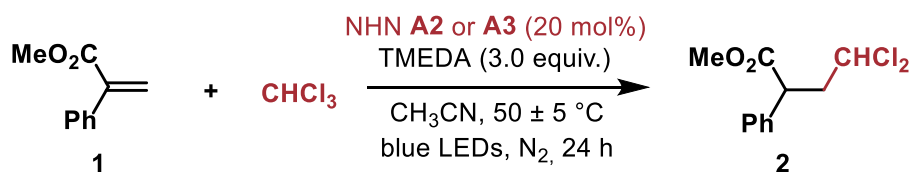

| Entry | Catalyst | NaI     | Yield (%) <sup>a</sup> |
|-------|----------|---------|------------------------|
| 1     | A2       | ---     | 38                     |
| 2     | A2       | 20 mol% | 54                     |
| 3     | A3       | ---     | 44                     |
| 4     | A3       | 20 mol% | 55                     |
| 5     | ---      | 20 mol% | NR                     |

<sup>a</sup> Yields were determined by <sup>1</sup>H NMR analysis of the crude reaction mixture using 1,1,2,2-tetrachloroethane as an internal standard.

### General procedure A:

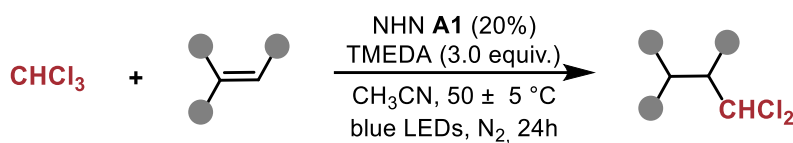

In a nitrogen-filled glove box, the olefin (0.2 mmol), NHN **A1** (0.04 mmol, 10.5 mg, 20 mol%), TMEDA (0.6 mmol, 69.7 mg, 90  $\mu\text{L}$ ) were added sequentially into a 10 mL dry tube, then  $\text{CH}_3\text{CN}$  (0.5 mL) and chloroform (0.2 mL) was added by syringe. The vial was closed and removed from the glove box, and the resulting mixture was allowed to stir under blue LED irradiation for 24 h, where the distance from the light source to the irradiation vessel is 2.0 cm to keep the reaction temperature at  $50 \pm 5^\circ\text{C}$ . Upon completion, solvent was removed under vacuum and the residue was subjected to silica gel chromatography using petroleum ether and ethyl acetate as eluent to afford the desired product.

### General procedure B:

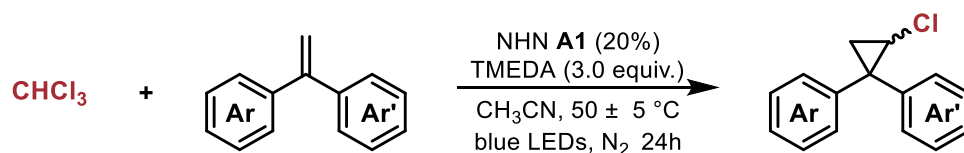

In a nitrogen-filled glove box, the olefin (0.2 mmol), NHN **A1** (0.04 mmol, 10.5 mg, 20 mol%), TMEDA (0.6 mmol, 69.7 mg, 90  $\mu\text{L}$ ) were added sequentially into a 10 mL dry tube under nitrogen, then DMF (0.5 mL) and chloroform (0.2 mL) was added by syringe. The vial was closed and removed from the glove box, and the resulting mixture was allowed to stir under blue LED irradiation for 24 h, where the distance from the light source to the irradiation vessel is 2.0 cm to keep the reaction temperature at  $50 \pm 5^\circ\text{C}$ . Upon completion, solvent was removed under vacuum and the residue was subjected to silica gel chromatography using petroleum ether and ethyl acetate as eluent to afford the desired product.

### General procedure C

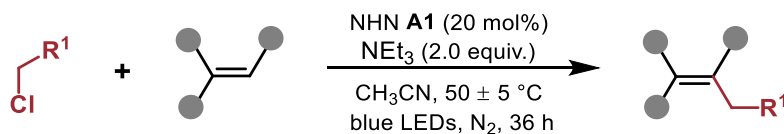

In a nitrogen-filled glove box, the alkyl chlorides (0.4 mmol), olefin (0.2 mmol), NHN **A1** (0.04 mmol, 10.5 mg, 20 mol%),  $\text{NEt}_3$  (0.4 mmol, 40.5 mg, 55.6  $\mu\text{L}$ ) were added sequentially into a 10 mL dry tube under nitrogen, then  $\text{CH}_3\text{CN}$  (0.5 mL) was added by syringe. The vial was closed and removed from the glove box, and the resulting mixture was allowed to stir under blue LED irradiation for 36 h, where the distance from the light source to the irradiation vessel is 2.0 cm to keep the reaction temperature at  $50 \pm 5^\circ\text{C}$ . Upon completion, solvent was removed under vacuum and the residue was subjected to silica gel chromatography using petroleum ether and ethyl acetate as eluent to afford the desired product.

#### 4. UV/vis Absorption Spectra Experiments

UV/vis absorption spectra were recorded using  $\text{CH}_3\text{CN}$  as solvent in 1 cm path quartz cuvettes using a UV-1900 UV/Vis spectrometer.

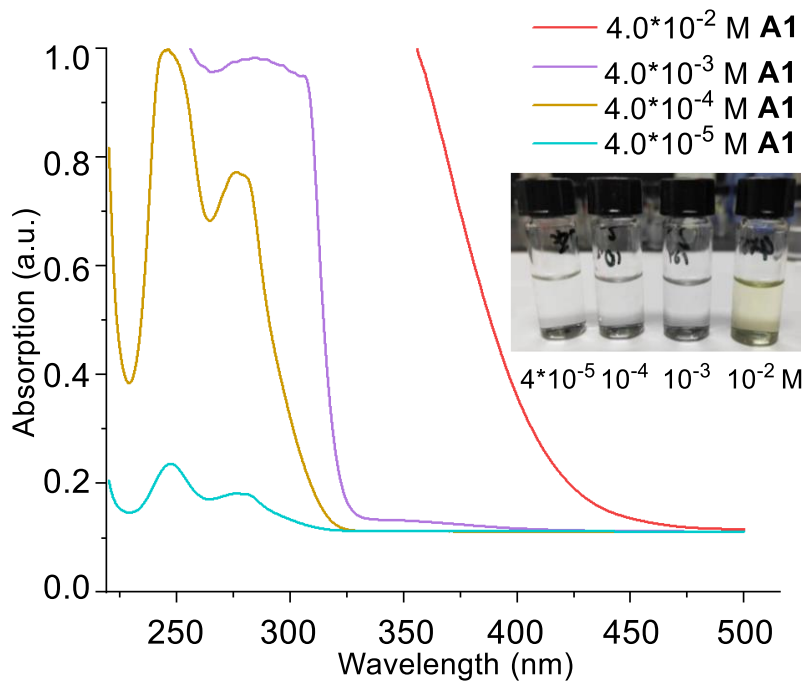

**Figure S2.** Absorption spectra of NHN salt A1, The UV/vis spectra of various concentrations of NHN A1 (0.04 M, 0.004 M, 0.0004 M and 0.00004M in  $\text{CH}_3\text{CN}$ ).

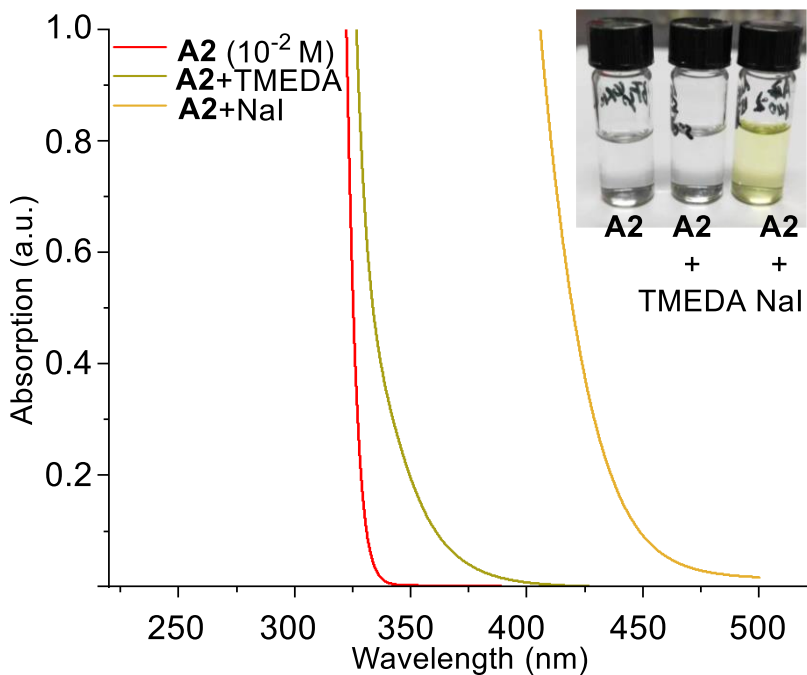

**Figure S3.** Absorption spectra of NHN salt **A2**, The UV/vis spectra of NHN **A2** (0.04 M in CH<sub>3</sub>CN) and his mixture with TMEDA (0.6 M in CH<sub>3</sub>CN), NaI (0.6 M in CH<sub>3</sub>CN) were tested.

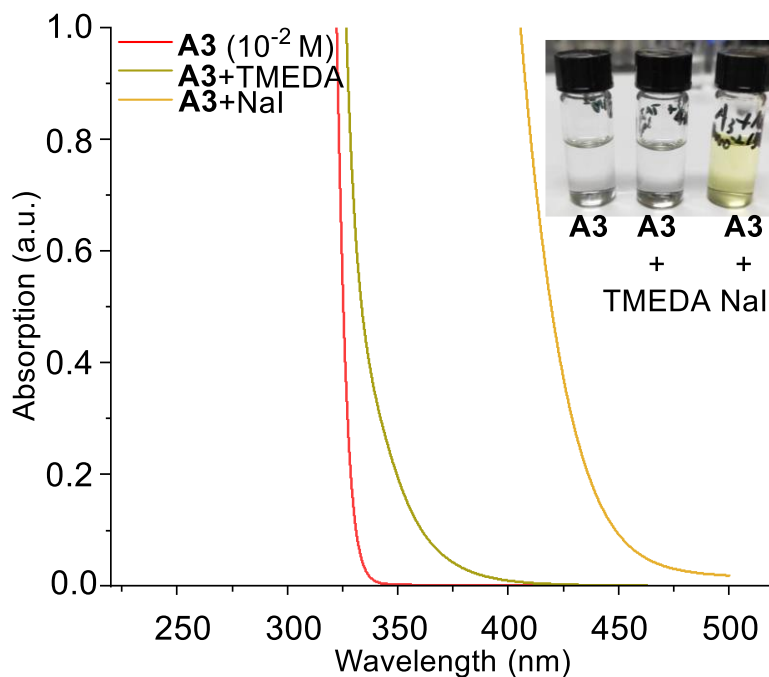

**Figure S4.** Absorption spectra of NHN salt **A3**, The UV/vis spectra of NHN **A3** (0.04 M in CH<sub>3</sub>CN) and his mixture with TMEDA (0.6 M in CH<sub>3</sub>CN), NaI (0.6 M in CH<sub>3</sub>CN) were tested.

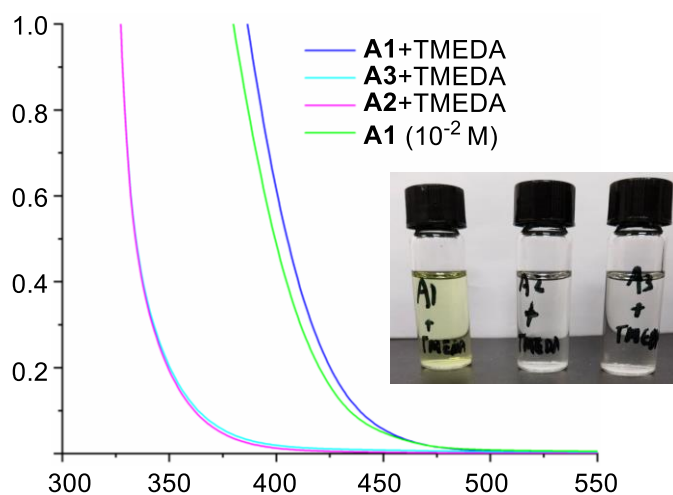

**Figure S5.** Absorption spectra of NHN salt **A1**, **A2**, **A3** and their mixture with TMEDA. The UV/vis spectra of NHN **A1** (0.04 M in CH<sub>3</sub>CN) and his mixture with TMEDA (0.6 M in CH<sub>3</sub>CN), **A2** + TMEDA (0.6 M in CH<sub>3</sub>CN), **A3** + TMEDA (0.6 M in CH<sub>3</sub>CN) were tested.

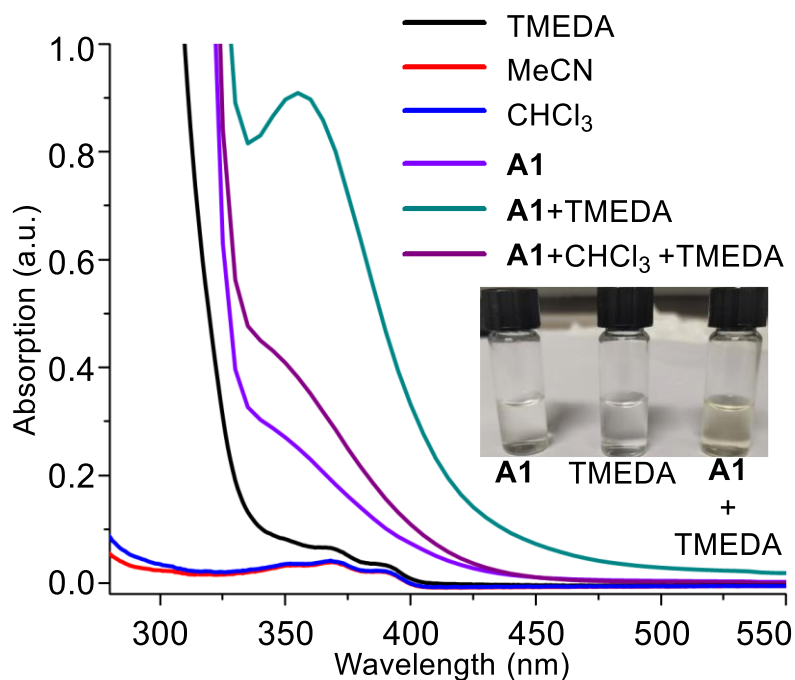

**Figure S6.** Absorption spectra of NHN salt **A1**, substrate **1**,  $\text{CHCl}_3$ , TMEDA and their mixture. The UV/vis spectra of methyl 2-phenylacrylate **1** (0.04 M in  $\text{CH}_3\text{CN}$ ), NHN **A1** (0.008 M in  $\text{CH}_3\text{CN}$ ),  $\text{CHCl}_3$  (0.04 M in  $\text{CH}_3\text{CN}$ ), TMEDA (0.04 M in  $\text{CH}_3\text{CN}$ ) and their mixture were tested.

## 5. Determination of the Binding Ratio by Job's Plot

Job's plot was performed according to the literature method.<sup>10</sup> NHN **A1** and TMEDA were dissolved in  $\text{DMSO-}d_6$  (0.5 mL), then the solutions of NHN **A1** and TMEDA were added to the NMR tube based on the specific ratio in Table S2. The  $^1\text{H}(\text{CH}_3)$  chemical shift of NHN **A1** in  $\text{DMSO-}d_6$  (0.04 mol/L) is 4.6251 ppm. The job's plot had a maximum when X (NHN **A1**) equals to 0.5, suggesting that the binding stoichiometry between TMEDA and NHN **A1** is 1:1.



**Table S2.**  $^1\text{H}$  NMR experimental data for Job's plot

| Entry | n (NHN A1, mmol) | n (TMEDA, mmol) | X (NHN A1) | $\delta$ ( $^1\text{H}(\text{CH})$ , ppm) | $\Delta\delta$ (ppm) | $\Delta\delta \cdot X$ (1) |
|-------|------------------|-----------------|------------|-------------------------------------------|----------------------|----------------------------|
| 1     | 0.1              | 0.00            | 1.0        | 4.6251                                    | 0                    | 0.000000                   |
| 2     | 0.08             | 0.02            | 0.8        | 4.6233                                    | 0.0018               | 0.000288                   |
| 3     | 0.07             | 0.03            | 0.7        | 4.6222                                    | 0.0029               | 0.000406                   |
| 4     | 0.06             | 0.04            | 0.6        | 4.6209                                    | 0.0042               | 0.000504                   |
| 5     | 0.05             | 0.05            | 0.5        | 4.6192                                    | 0.0059               | 0.000590                   |
| 6     | 0.04             | 0.06            | 0.4        | 4.6177                                    | 0.0074               | 0.000592                   |
| 7     | 0.03             | 0.07            | 0.3        | 4.6165                                    | 0.0086               | 0.000516                   |
| 8     | 0.02             | 0.08            | 0.2        | 4.6145                                    | 0.0106               | 0.000424                   |
| 9     | 0.00             | 0.10            | 0.0        | 0                                         | 0                    | 0.000000                   |

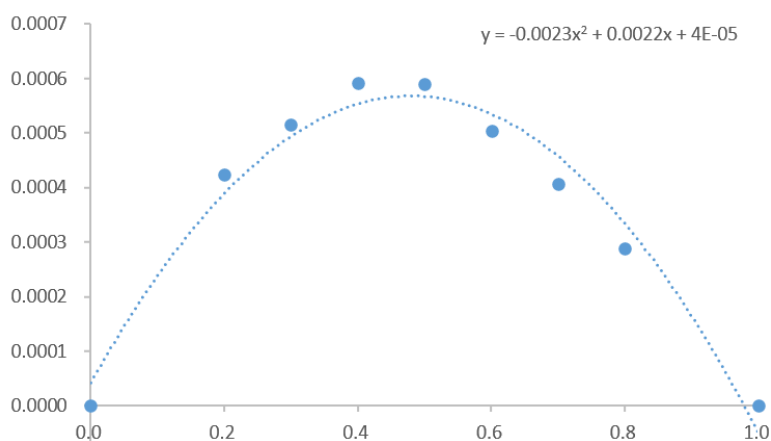**Figure S7.** Job's plot for the determination of binding stoichiometry between NHN A1 and TMEDA

#### $^1\text{H}$ NMR Titrations of TMEDA with NHN A1

NHN A1 (0.02 mmol) and TMEDA were mixed in  $\text{DMSO-}d_6$  (0.5 mL), then the resulted mixture was injected into an NMR tube. The  $^1\text{H}$  NMR (500 MHz,  $\text{DMSO-}d_6$ , 25 °C) spectra of the 0.04 M  $\text{DMSO-}d_6$  solution of NHN A1 with increasing concentration of TMEDA (corresponding concentration from bottom to top is 0.06, 0.12, 0.18, 0.24, 0.30, 0.36, 0.41, 0.48, 0.54 and 0.60 M) were recorded and shown in Figure S8. The titration curve was obtained with Bindfit program based on the  $^1\text{H}$  titration experiment (Figure S9), and the association constant  $K_a$  between NHN A1 and TMEDA was calculated to be  $1.66 \pm 0.01 \text{ M}^{-1}$ .<sup>11</sup>

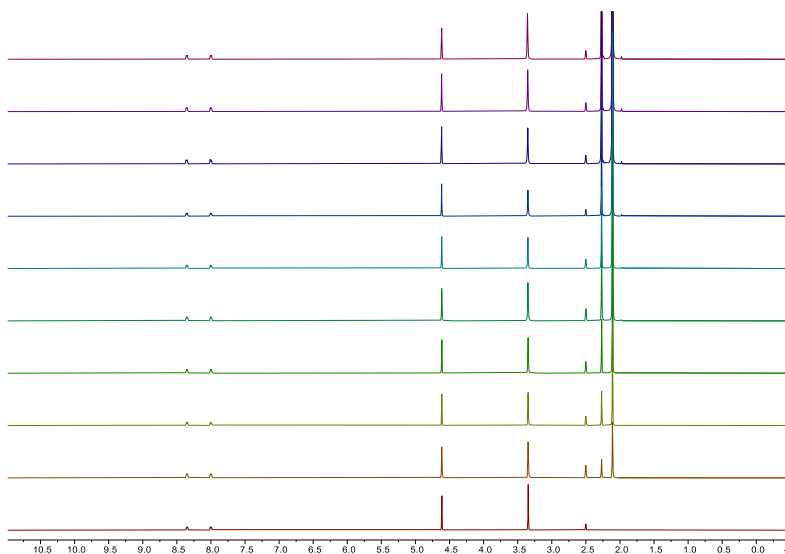

**Figure S8.**  $^1\text{H}$  NMR spectra recorded during the titration of **NHN A1** (0.04 M) with variable concentrations (0.0-10.0 equiv.) of TMEDA in  $\text{DMSO-}d_6$ .

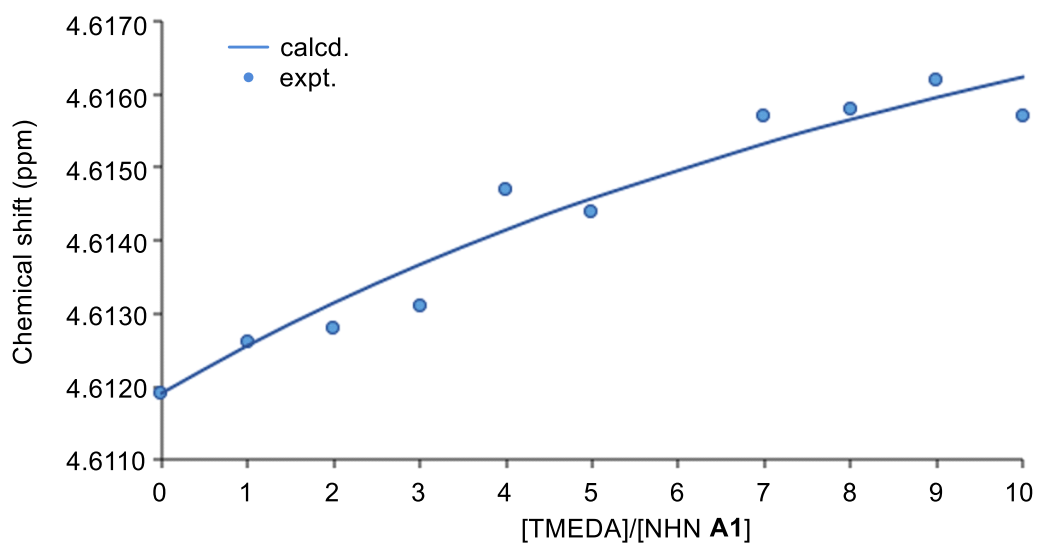

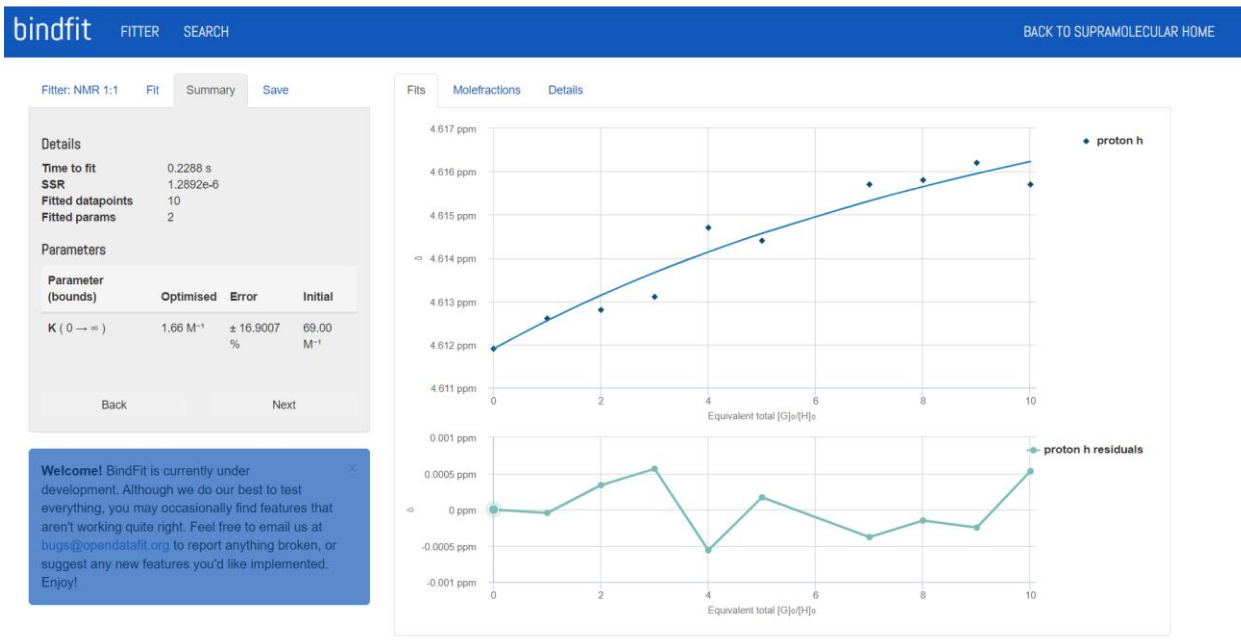

**Figure S9.** The curve fitting of the  $^1\text{H}$  NMR titration data by Bindfit program, available online (<http://supramolecular.org/>); fitting output from Bindfit.

## 6. Quantum yield determination

According to the procedure of Xu<sup>7</sup>: 3 To an oven-dried 10 mL glass tube sealed with rubber septum. **1** (0.2 mmol),  $\text{CHCl}_3$  (0.2 mL), catalyst (20 mol%) and additive (0.6 mmol) were combined in  $\text{CH}_3\text{CN}$  (0.5 mL) under  $\text{N}_2$  atmosphere. The reaction mixture was stirred and irradiated ( $\lambda = 450$  nm, PLS-LED100C) for 20 min. After irradiation, the solution was measured the unit area photon flux (MQ-500 photosynthetic active radiation meter). And the yields were determined by  $^1\text{H}$  NMR analysis of the crude reaction mixture using 1,1,2,2-tetrachloroethane as an internal standard. The quantum yield is calculated using the following equation:

$$\phi = \frac{\text{mol product}}{\text{flux} \cdot S \cdot t}$$

Where,  $\Phi$  is quantum yield,  $S$  ( $\text{m}^2$ ) is the irradiation area and  $t$  (s) is the photoreaction time. Experiment: the unit photon flux was  $310 \mu\text{mol}\cdot\text{s}^{-1}\cdot\text{m}^{-2}$  (average of three experiments), the irradiation area was  $1.4 \times 10^{-4} \text{ m}^2$ , and the product yield was 14% after 20 min (1200 s).

Quantum yield calculation:

$$\phi = \frac{\text{mol product}}{\text{flux} \cdot S \cdot t} = \frac{0.14 \times 0.2 \times 10^3}{310 \times 1.4 \times 10^{-4} \times 1200} = 0.55$$

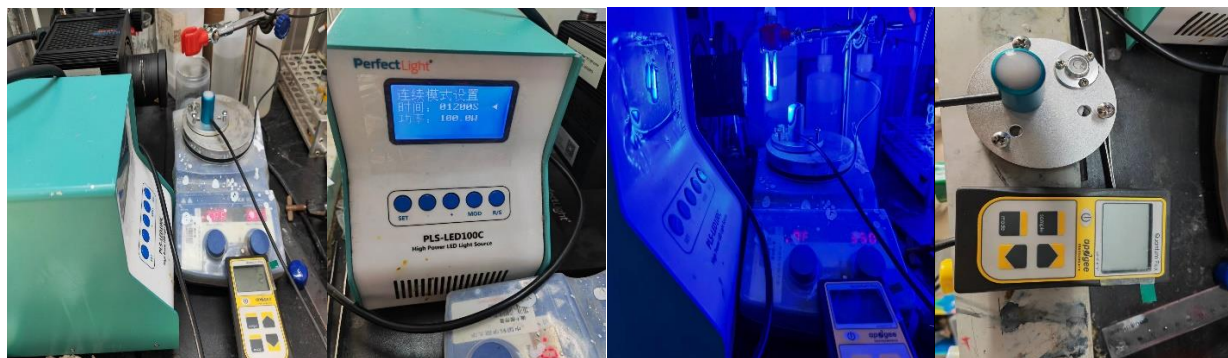

## 7. EPR Spectroscopy Experiments

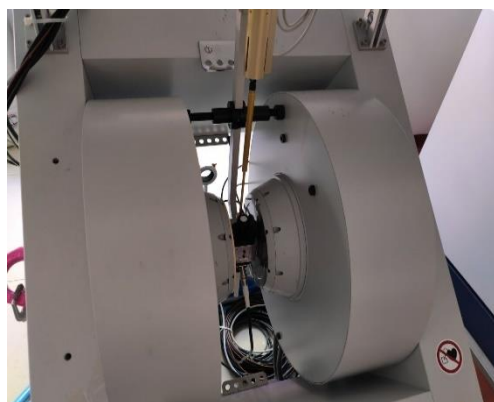

Continuous-wave (CW) electron paramagnetic resonance (EPR) measurements were performed on acetonitrile solution in capillary tubes at ambient temperature with a Bruker EMXplus spectrometer at microwave frequencies of about 9.85 GHz. A Bruker super-high Q resonator (ER 4119HS) with slits in the cavity wall for optical excitation was used. As a light source, a 100 W blue LED ( $\lambda = 450$  nm, PLS-LED100C) was placed outside the magnet 40 cm from the cavity wall. CW EPR spectra were measured with a microwave power of 2.518 mW and a modulation amplitude of 0.1 mT in order to avoid line broadening by saturation or overmodulation.

### Characterization of the $\text{CHCl}_2$ radical

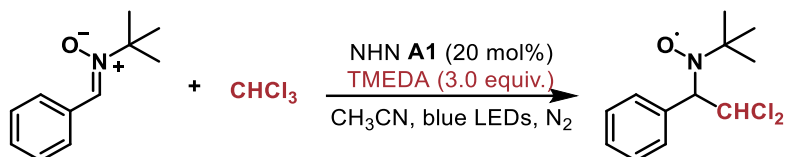

In a nitrogen-filled glove box, NHN A1 (0.02 mmol, 5.3 mg, 20 mol%), TMEDA (0.3 mmol, 45  $\mu\text{L}$ ), PBN (0.3 mmol, 53.2mg) in dry  $\text{CH}_3\text{CN}$  (0.25 mL) and chloroform (0.1 mL). The solution was added to 3 mm EPR tube and sealed. The EPR tube was measured under blue light irradiation ( $\lambda = 450$  nm). Upon irradiation, there was an immediate observation of the spin-trapped  $\text{CHCl}_2$  radical adduct. Upon cessation of irradiation, the EPR signal vanished.

The hyperfine couplings of the PBN radical adduct are  $^a\text{N} = 1.468$  mT and  $^a\text{H} = 0.221$  mT (Figure S10a). After the light was switched off, a weak signal was still detectable in the first scan, but not thereafter. The simulated hyperfine coupling is consistent with the known report.<sup>8</sup>

When TMEDA was not added, the spin-trapped  $\text{CHCl}_2$  radical adduct was not observed (Figure S10b).

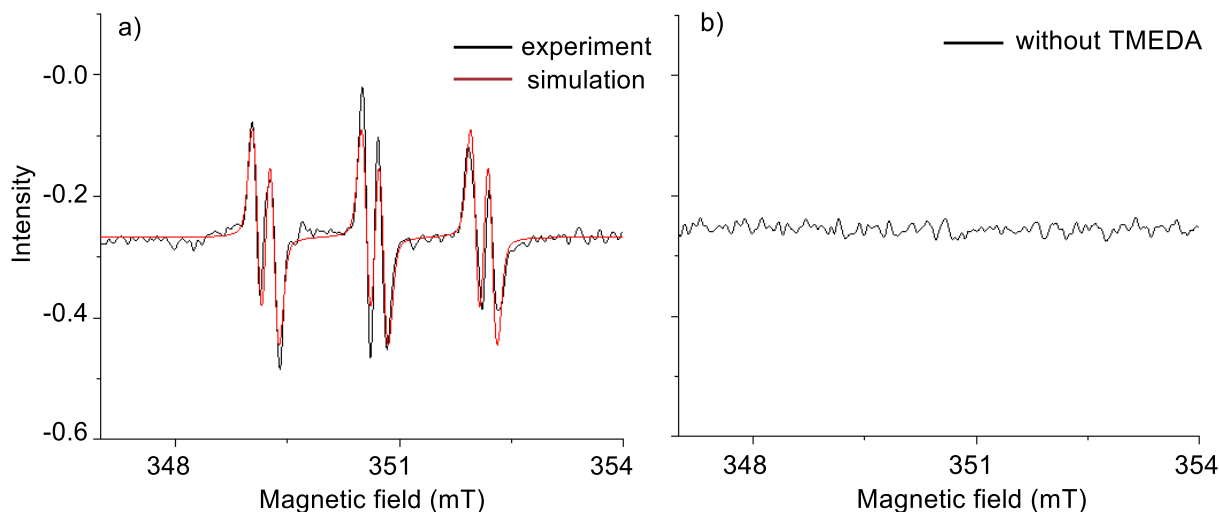

**Figure S10.** a) EPR spectrum of the PBN radical adduct. The hyperfine couplings are  $^a\text{N} = 1.468$  mT for the nitroxide nitrogen,  $^a\text{H} = 0.221$  mT for the hydrogen bound to the C atom. b) EPR spectrum of the PBN radical adduct without TMEDA.

## 8. Radical Trapping Experiments

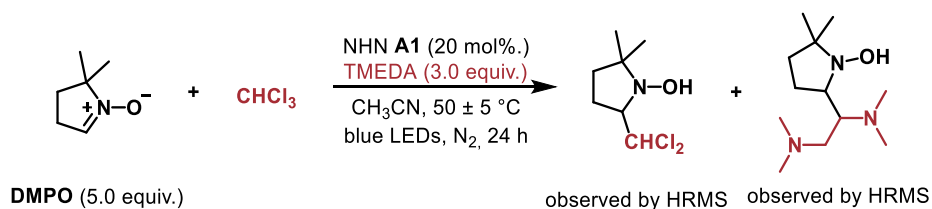

The NHN **A1** (0.06 mmol, 16.5 mg, 20 mol%), TMEDA (0.3 mmol, 69.7 mg, 90  $\mu\text{L}$ ), DMPO (0.5 mmol, 56.6mg) were added sequentially into a 10 mL dry tube under nitrogen, then  $\text{CH}_3\text{CN}$  (0.5 mL) and chloroform (0.2 mL) was added by syringe. After degas, the resulting mixture was allowed to stir under blue LED irradiation for 24h as monitored by TLC, where the distance from the light source to the irradiation vessel is 2 cm to keep the reaction temperature with  $50 \pm 5$   $^\circ\text{C}$ . Upon completion, the products of  $\text{CHCl}_2$  and  $\alpha$ -aminoalkyl radical trapped by DMPO are detected by HRMS.

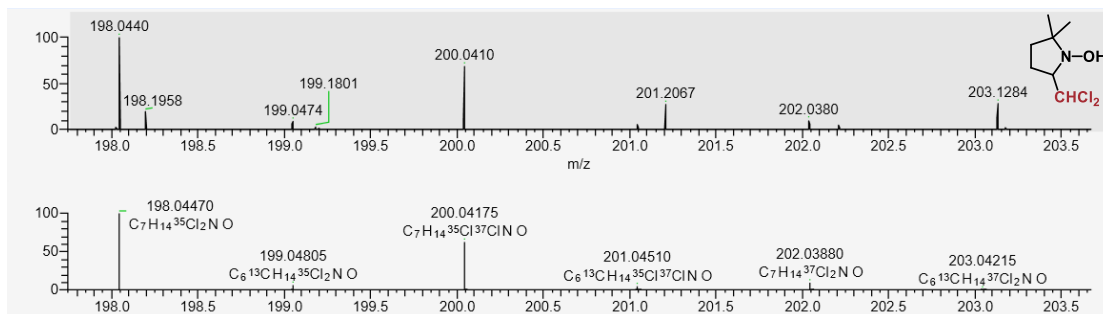

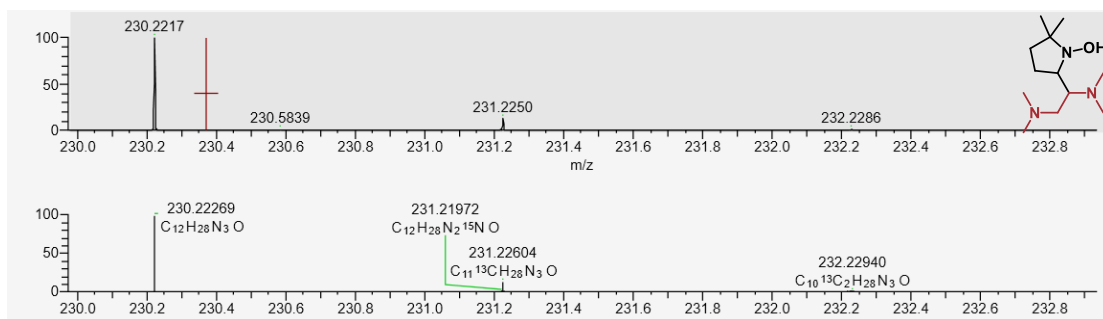

**Figure S11.** The HRMS results for  $\text{CHCl}_2$  and  $\alpha$ -aminoalkyl radical trapped by DMPO.

## 9. Deuterium incorporation experiments.

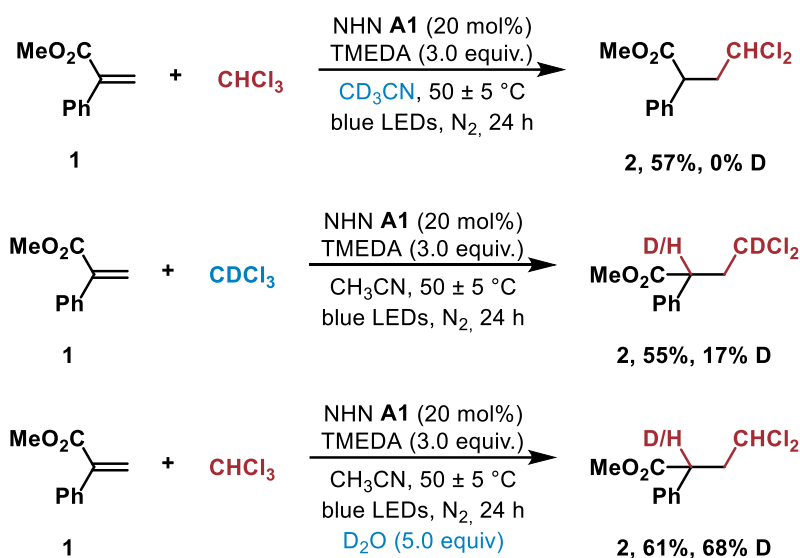

Following the general procedure A, the reaction was performed using  $\text{CD}_3\text{CN}$  instead of  $\text{CH}_3\text{CN}$  or  $\text{CDCl}_3$  instead of  $\text{CHCl}_3$  or adding 5.0 equiv. of  $\text{D}_2\text{O}$ .

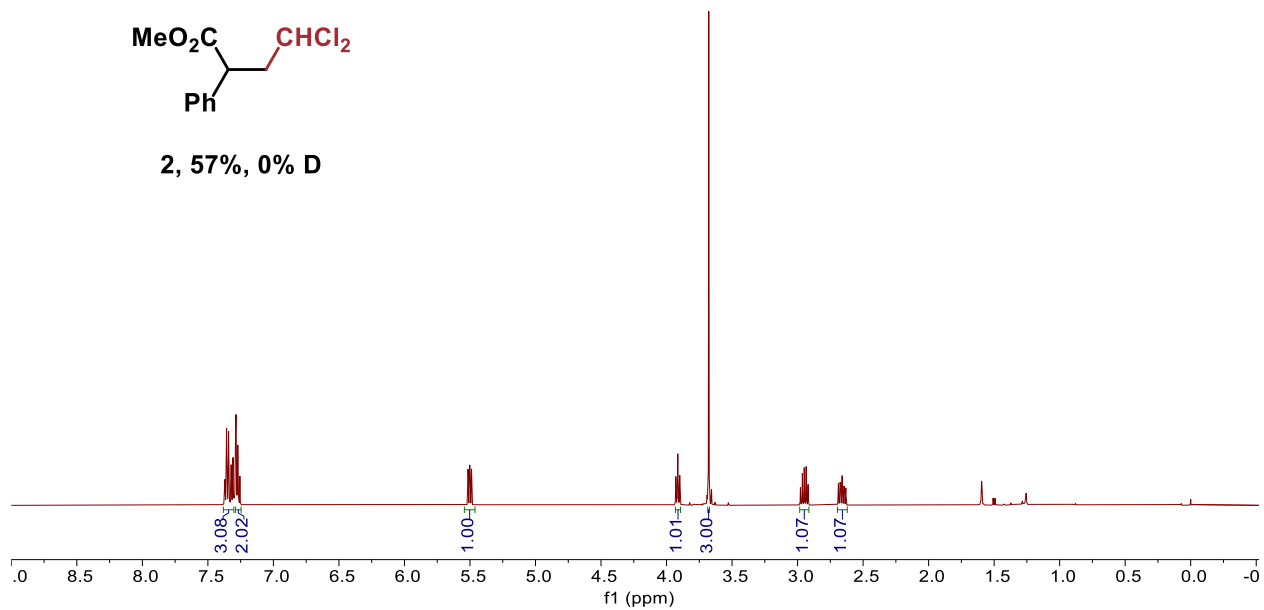

Figure S12.  $^1\text{H}$  NMR spectrum of **2** using  $\text{CD}_3\text{CN}$ .

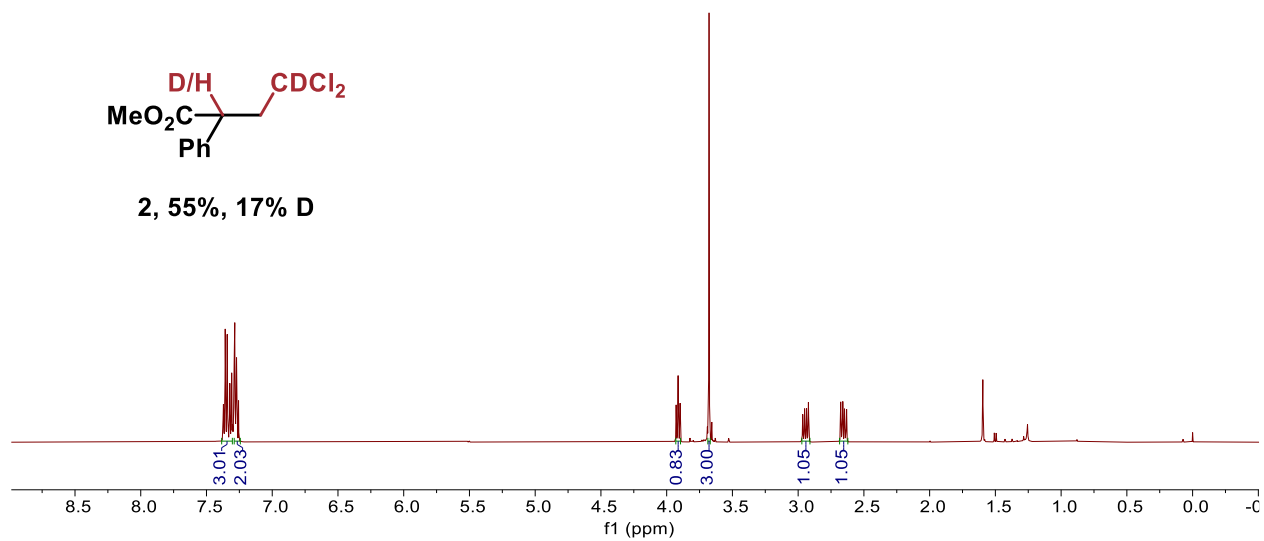

Figure S13.  $^1\text{H}$  NMR spectrum of **2** using  $\text{CDCl}_3$ .

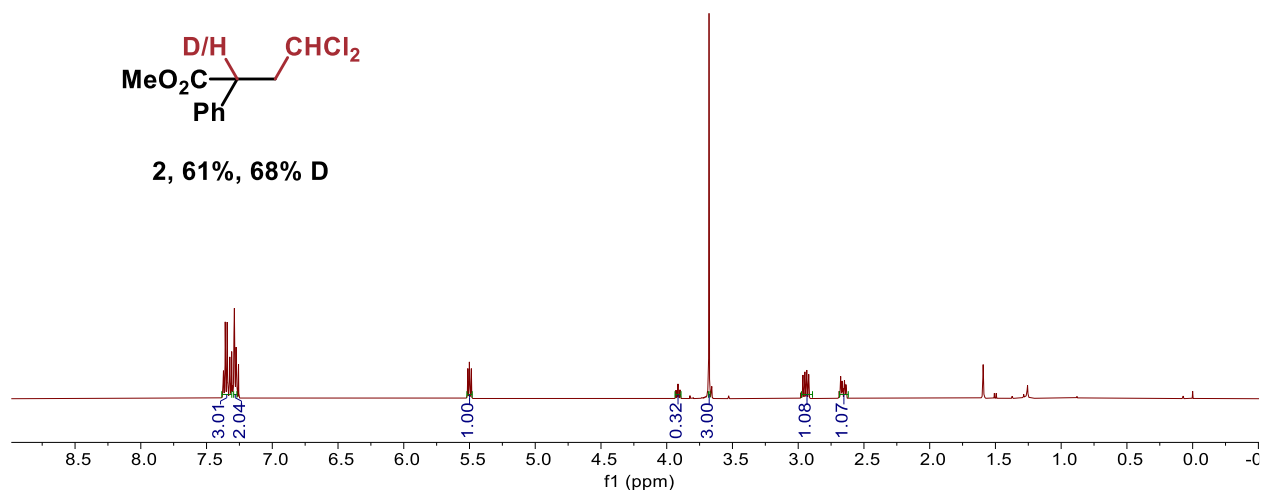

**Figure S14.**  $^1\text{H}$  NMR spectrum of **2** with addition of  $\text{D}_2\text{O}$ .

## 10. Cyclic Voltammetry Analysis

Voltammetric experiments were conducted with a computer-controlled Shanghai Chen Hua CHI660E containing glassy carbon electrode serving as the working electrode, saturated  $\text{Ag}/\text{AgCl}$  reference electrode, Pt wire auxiliary electrode. All solutions used for the voltammetric experiments were performed in a Faraday cage at room temperature ( $23 \pm 2$  °C).

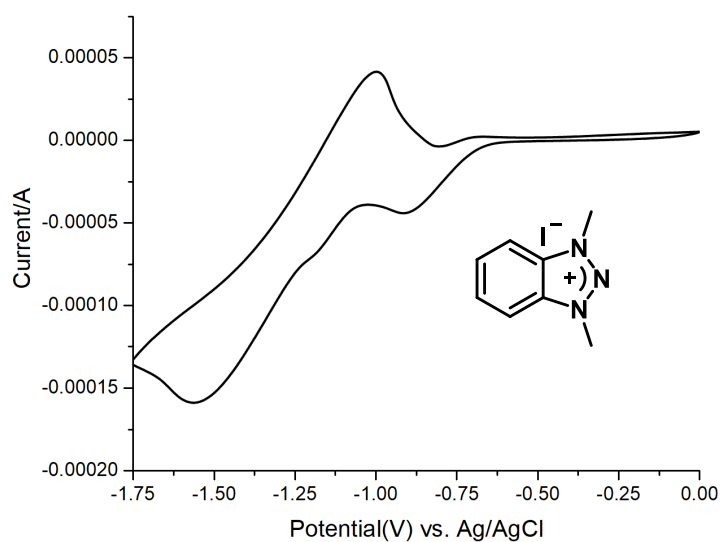

**Figure S15.** Cyclic voltammograms of NHN **A1** in  $\text{CH}_3\text{CN}$  (5.0 mM). Scan rate: 0.04 V/s.  $E^{\text{red}} = -1.56$  V.



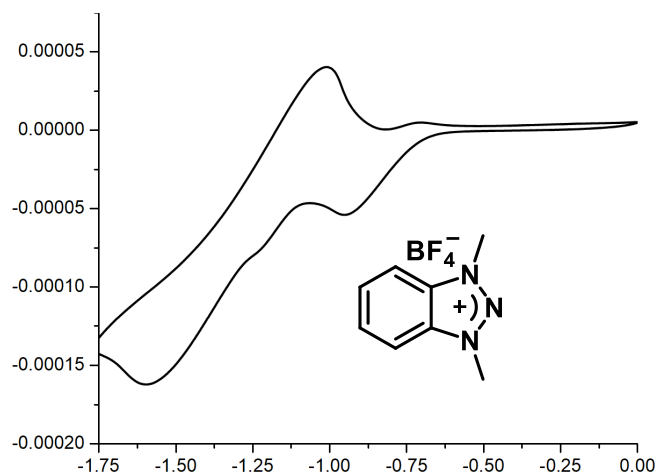

**Figure S16.** Cyclic voltammograms of NHN A2 in CH<sub>3</sub>CN (5.0 mM). Scan rate: 0.04 V/s.  $E^{\text{red}} = -1.56$  V.

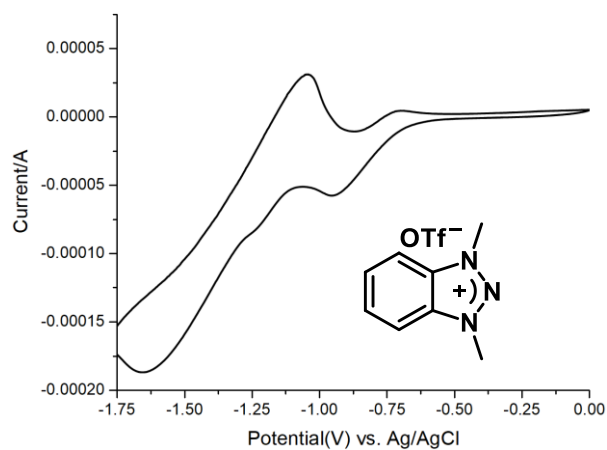

**Figure S17.** Cyclic voltammograms of NHN A3 in CH<sub>3</sub>CN (5.0 mM). Scan rate: 0.04 V/s.  $E^{\text{red}} = -1.56$  V.

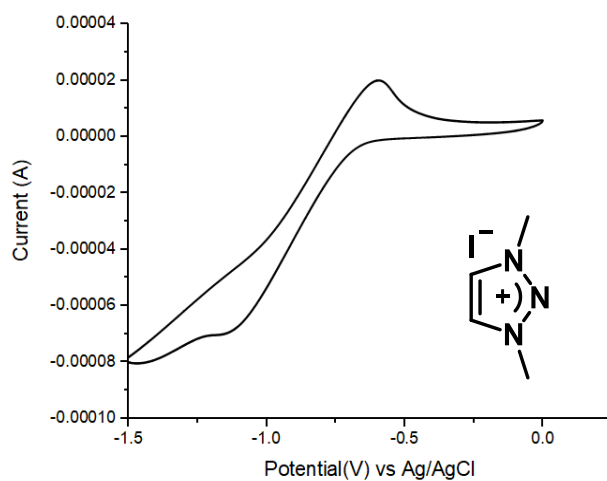

**Figure S18.** Cyclic voltammograms of NHN C in CH<sub>3</sub>CN (5.0 mM). Scan rate: 0.04 V/s.  $E^{\text{red}} = -1.10$  V.

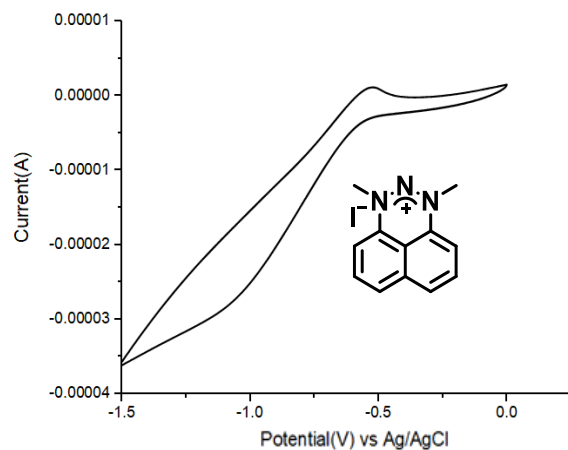

**Figure S19.** Cyclic voltammograms of NHN **D** in CH<sub>3</sub>CN (5.0 mM). Scan rate: 0.04 V/s.  $E^{\text{red}} = -1.05$  V.

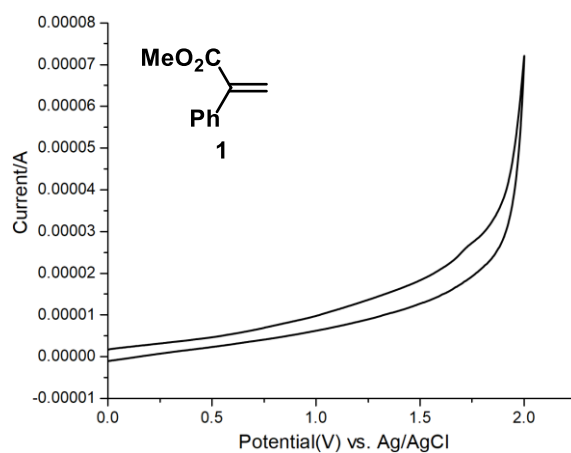

**Figure S20.** Cyclic voltammograms of **1** in CH<sub>3</sub>CN (5.0 mM) containing 0.10M TBAPF<sub>6</sub> as supporting electrolyte. Scan rate: 0.04 V/s.  $E^{\text{ox}} = +1.75$ V.

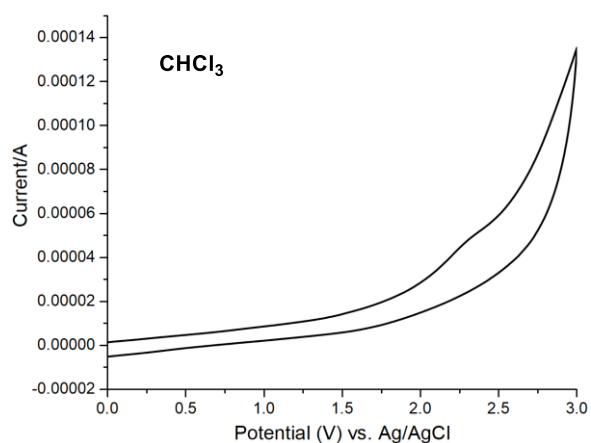

**Figure S21.** Cyclic voltammograms of CHCl<sub>3</sub> in CH<sub>3</sub>CN (5.0 mM) containing 0.10M TBAPF<sub>6</sub> as supporting electrolyte. Scan rate: 0.04 V/s.  $E^{\text{ox}} = +2.25$ V.

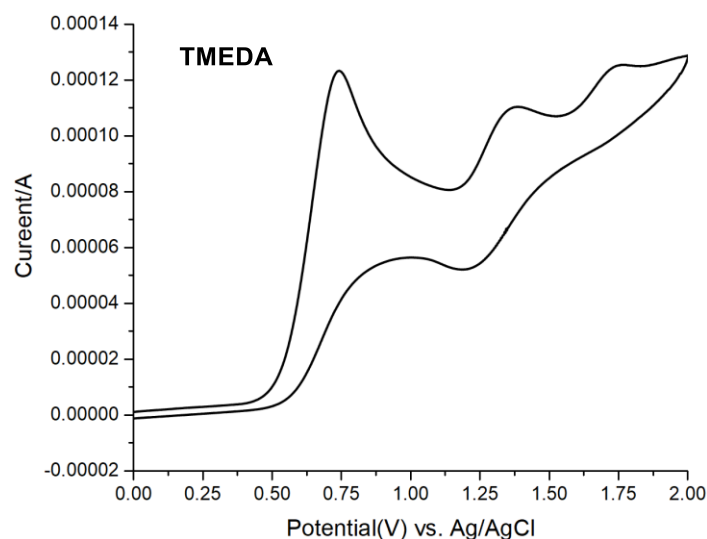

**Figure S22.** Cyclic voltammograms of TMEDA in CH<sub>3</sub>CN (5.0 mM) containing 0.10M TBAPF<sub>6</sub> as supporting electrolyte. Scan rate: 0.04 V/s.  $E^{\text{ox}} = +0.75\text{V}$ .

## 11. Evaluation of Excited State Potential and Lifetime of the Photocatalyst

Fluorescence spectra were recorded on a Edingburg FS5 Fluorescent Spectrophotometer. The samples NHN A1-A3 were prepared as a 0.01 mM solution in CH<sub>3</sub>CN and used freshly for the measurement.

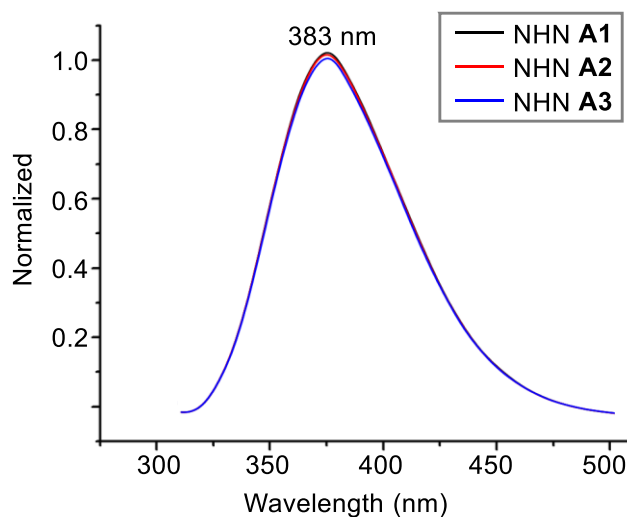

**Figure S23.** Fluorescence emission spectra of NHN A1-A3 (excited at 300 nm). The  $\lambda_{\text{max,em}}$  was estimated to be 383 nm. The  $\lambda_{\text{offset,em}}$  was estimated to be 500 nm.

**Remarks:** Using,  $\lambda_{\text{max,em}}$ ,  $\lambda_{\text{offset,em}}$  and  $E^{\text{red}}$ , the excited state reduction potential was determined for  $E^*(\text{A1}^*/\text{A1}^{\cdot-})$  according to the following equations:  $E^*(\text{A1}^*/\text{A1}^{\cdot-}) = E^{\text{red}} + E^{0,0}$ , where  $E^{0,0} = hc/\lambda = 1240 \text{ nm}/\lambda$ .

$E^*(\text{A1}^*/\text{A1}^{\cdot-}) = 0.92 - 1.68\text{V}$ .

Estimating lifetime of excited state of the photocatalysts was based on the ultrafast transient absorption spectroscopic techniques. The luminescence decays were measured on an Edingburg FLS980 spectrometer. The sample compartment was home-built and designed as 10x10 mm cuvettes in 90° geometry between excitation and detection. The solution of NHN **A1** in CH<sub>3</sub>CN (0.01 mM) was excited at 280 nm. All decay traces were fitted by iterative reconvolution with an experimental instrument response function recorded directly after decay acquisition.

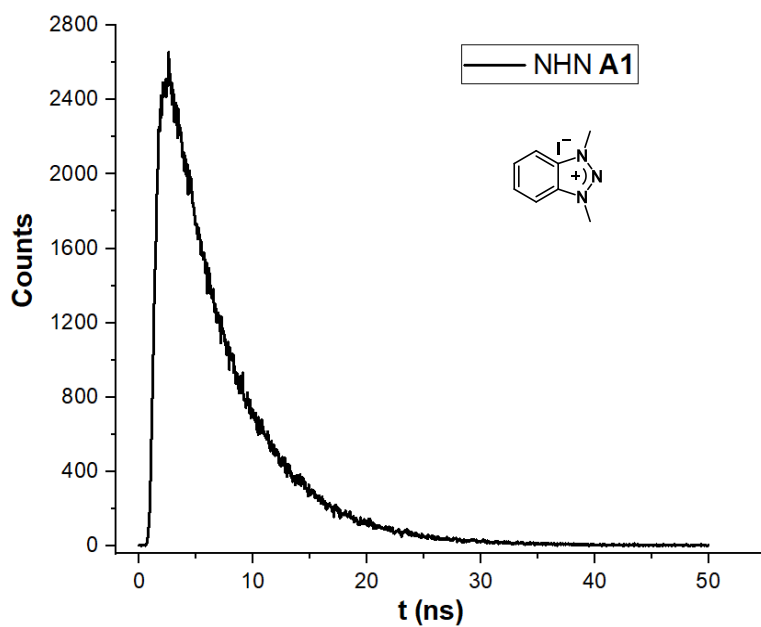

**Figure S24.** Luminescence decays of NHN **A1** in CH<sub>3</sub>CN detected at 25 °C after excitation at 280 nm.  $\tau = 5.65$  ns.

## 12. Stern-Volmer Luminescence Quenching Studies

Luminescence intensities were recorded using an Edinburgh Instruments FS5 spectrofluorometer. All luminescence measurements were recorded using a screw-top quartz cuvette (fluorescence quartz cuvette, 10 x 10 mm, 3.5 mL).

Quenching was analyzed by plotting  $I_0/I$  according to the Stern-Volmer relationship:

$I_0/I = k_q\tau_0[Q]+1$  where  $I_0$  represents the integral of the luminescence over the range of 310 to 500 nm in the absence of a quencher,  $I$  is the integral of luminescence over the range of 310 to 500 nm in the presence of a quencher,  $k_q$  represents the quenching rate constant,  $[Q]$  is the concentration of a given quencher.

| NHN A1   | Quencher | Ratio (A1 : Q) |
|----------|----------|----------------|
| 0.00001M | 0.001M   | 1 : 100        |
|          | 0.002M   | 1 : 200        |
|          | 0.003M   | 1 : 300        |
|          | 0.004M   | 1 : 400        |

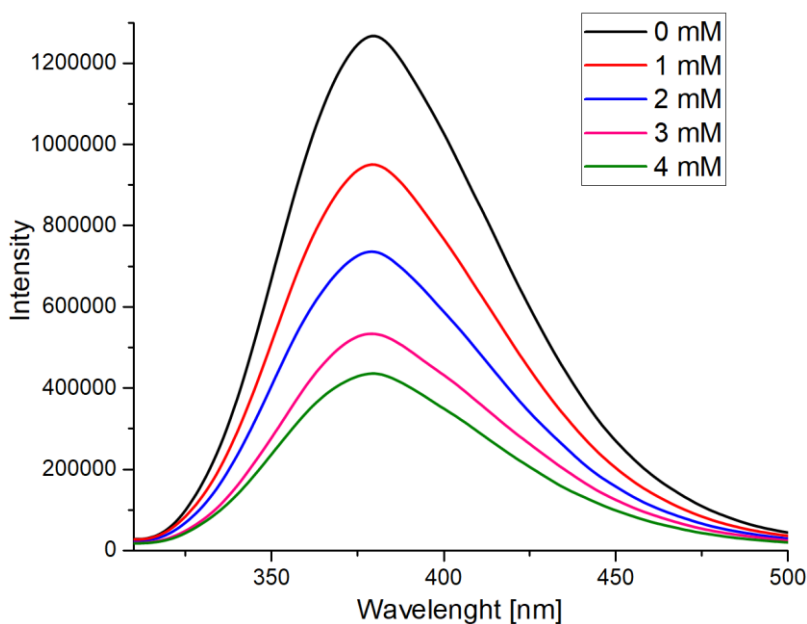

**Figure S25.** Fluorescence emission spectrum of NHN A1 at different concentrations of NaI.

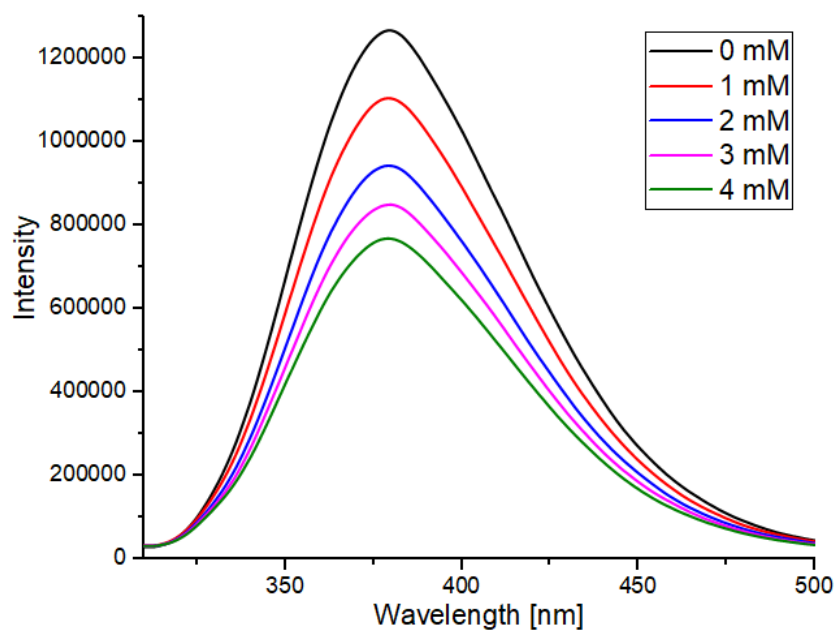

**Figure S26.** Fluorescence emission spectrum of NHN A1 at different concentrations of TMEDA.

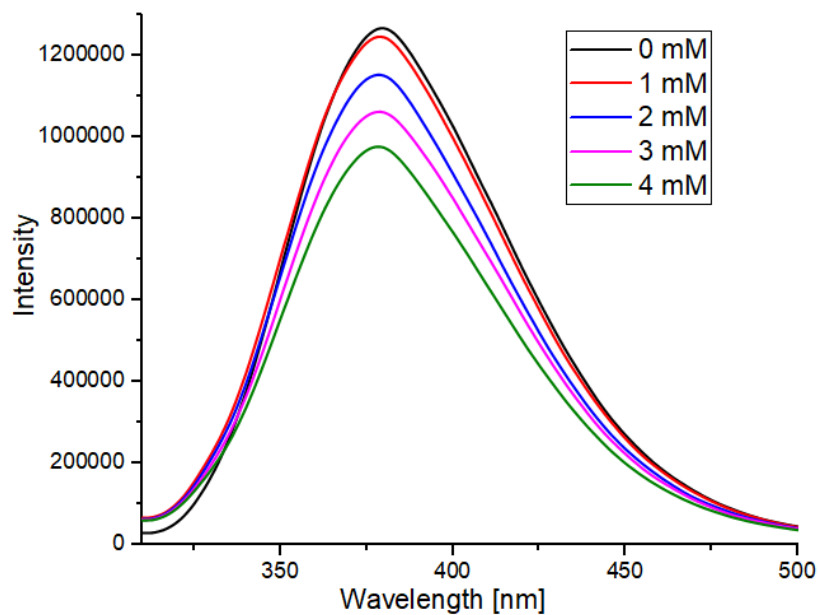

**Figure S27.** Fluorescence emission spectrum of NHN A1 at different concentrations of substrate 1.

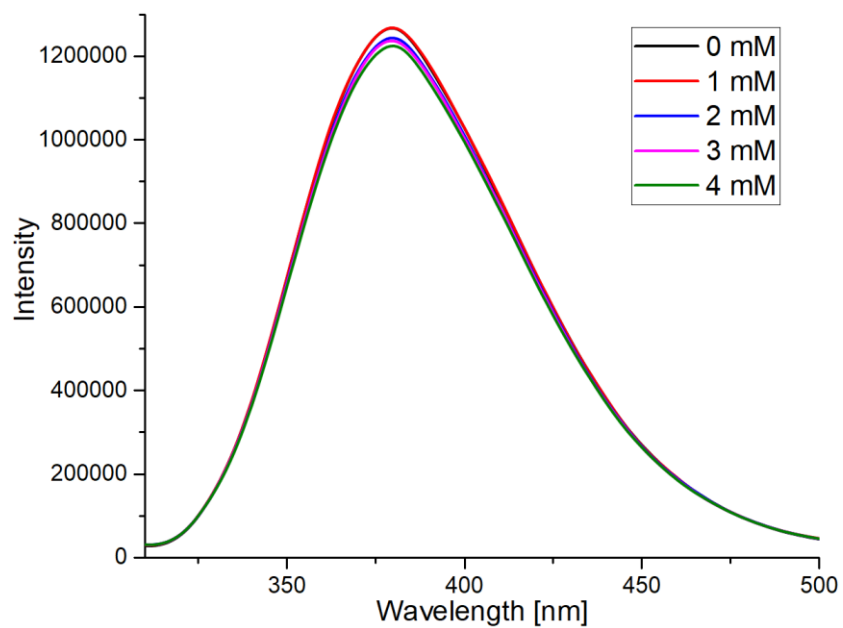

**Figure S28.** Fluorescence emission spectrum of NHN A1 at different concentrations of  $\text{CHCl}_3$ .

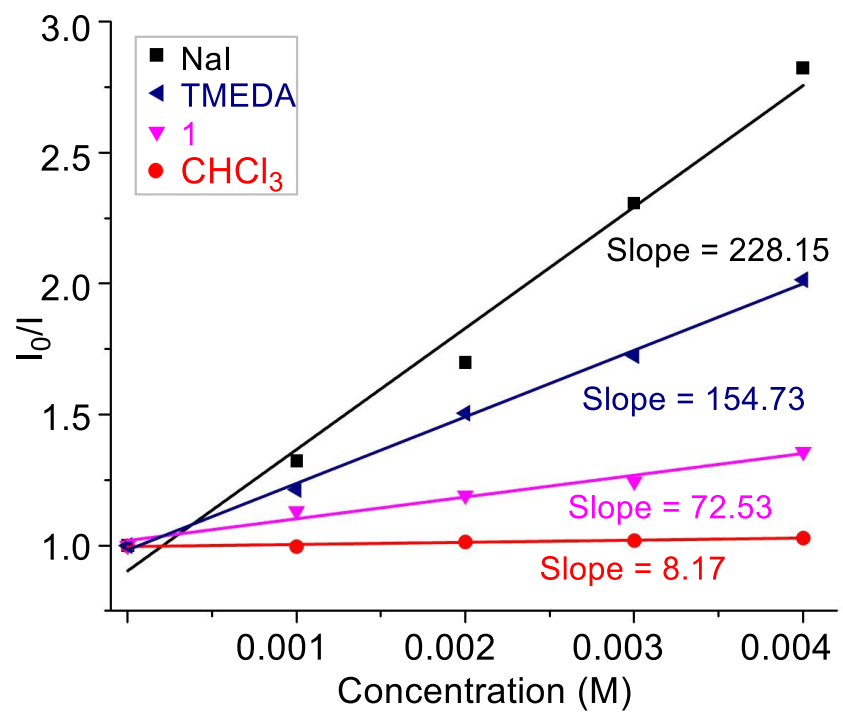

**Figure S29.** Stern-Volmer plot.

### 13. Compound Characterization Data

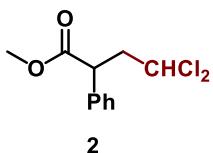

**methyl 4,4-dichloro-2-phenylbutanoate (2)** Following the general procedure A, the title product was obtained after purification by column chromatography (PE/EA = 20:1) as a yellow oil (30.5 mg, 0.124 mmol, 62%). **<sup>1</sup>H NMR** (500 MHz, CDCl<sub>3</sub>) δ 7.38 – 7.26 (m, 5H), 5.50 (dd, *J* = 7.6, 5.8 Hz, 1H), 3.91 (t, *J* = 7.6 Hz, 1H), 3.68 (s, 3H), 2.95 (ddd, *J* = 14.7, 7.6, 7.6 Hz, 1H), 2.66 (ddd, *J* = 14.7, 7.6, 5.8 Hz, 1H). **<sup>13</sup>C NMR** (126 MHz, CDCl<sub>3</sub>) δ 173.0, 136.8, 129.3, 128.2, 128.0, 71.3, 52.6, 48.7, 46.6. **IR** (ATR): 2957, 1732, 1435, 1163, 782, 753, 699, 651 cm<sup>-1</sup>. **HRMS** (ESI): *m/z* [M+H]<sup>+</sup> calcd for C<sub>11</sub>H<sub>13</sub>O<sub>2</sub>Cl<sub>2</sub><sup>+</sup>: 247.0287; found 247.0279.

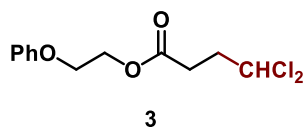

**2-phenoxyethyl 4,4-dichlorobutanoate (3)** Following the general procedure A, the title product was obtained after purification by column chromatography (PE/EA = 20:1) as a brown oil (27.6 mg, 0.100 mmol, 50%). **<sup>1</sup>H NMR** (500 MHz, CDCl<sub>3</sub>) δ 7.33 – 7.28 (m, 2H), 7.01 – 6.95 (m, 1H), 6.95 – 6.88 (m, 2H), 5.92 (t, *J* = 5.8 Hz, 1H), 4.53 – 4.39 (m, 2H), 4.25 – 4.10 (m, 2H), 2.68 (t, *J* = 7.3 Hz, 2H), 2.58 – 2.43 (m, 2H). **<sup>13</sup>C NMR** (126 MHz, CDCl<sub>3</sub>) δ 172.0, 158.5, 129.7, 121.4, 114.7, 72.3, 65.8, 63.4, 38.4, 30.3. **IR** (ATR): 2923, 1735, 1599, 1497, 1244, 1171, 1087, 755, 692 cm<sup>-1</sup>. **HRMS** (APCI): *m/z* [M+H]<sup>+</sup> calcd for C<sub>12</sub>H<sub>15</sub>O<sub>3</sub>Cl<sub>2</sub><sup>+</sup>: 277.0393; found 277.0397.

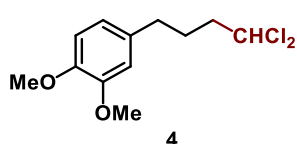

**4-(4,4-dichlorobutyl)-1,2-dimethoxybenzene (4)** Following the general procedure A, the title product was obtained after purification by column chromatography (PE/EA = 20:1) as a colorless oil (21.0 mg, 0.080 mmol, 40%). **<sup>1</sup>H NMR** (400 MHz, CDCl<sub>3</sub>) δ 6.80 (dd, *J* = 7.9, 1.8 Hz, 1H), 6.76 – 6.64 (m, 2H), 5.75 (t, *J* = 6.1 Hz, 1H), 3.88 (s, 3H), 3.87 (s, 3H), 2.62 (t, *J* = 7.6 Hz, 2H), 2.28 – 2.14 (m, 2H), 1.94 – 1.76 (m, 2H). **<sup>13</sup>C NMR** (126 MHz, CDCl<sub>3</sub>) δ 149.0, 147.5, 133.9, 120.3, 111.6, 111.3, 73.6, 56.0, 56.0, 43.0, 34.4, 27.8. **IR** (ATR): 2935, 2850, 1515, 1464, 1262, 1236, 1139, 1028, 735 cm<sup>-1</sup>. **HRMS** (APCI): *m/z* [M+H]<sup>+</sup> calcd for C<sub>12</sub>H<sub>17</sub>O<sub>2</sub>Cl<sub>2</sub><sup>+</sup>: 263.0600; found 263.0603.

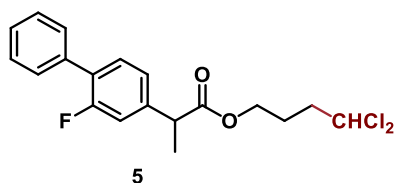

**4,4-dichlorobutyl 2-(2-fluoro-[1,1'-biphenyl]-4-yl)propanoate (5)** Following the general procedure A, the title product was obtained after purification by column chromatography (PE/EA = 20:1) as a colorless oil (31.7 mg, 0.086 mmol, 43%). **<sup>1</sup>H NMR** (400 MHz, CDCl<sub>3</sub>) δ 7.56 – 7.34 (m, 6H), 7.16 – 7.10 (m, 2H), 5.70 (t, *J* = 5.9 Hz, 1H), 4.21 – 4.11 (m, 2H), 3.76 (q, *J* = 7.2 Hz, 1H), 2.19 – 2.14 (m, 2H), 1.93 – 1.82 (m, 2H), 1.55 (d, *J* = 7.1 Hz, 3H). **<sup>13</sup>C NMR** (126 MHz, CDCl<sub>3</sub>) δ 174.0, 159.8 (d, *J* = 249.1), 141.7 (d, *J* = 7.6), 135.6, 131.1 (d, *J* = 4.2), 129.1 (d, *J* = 2.9), 128.6, 128.1 (d, *J* = 13.6), 127.8, 123.6 (d, *J* = 3.3), 115.3 (d, *J* = 23.7), 72.9, 63.7, 45.1, 40.2, 25.1, 18.3. **<sup>19</sup>F NMR** (471 MHz, CDCl<sub>3</sub>) δ -117.35



--117.31 (m, 1F). **IR** (ATR): 2921, 1732, 1484, 1418, 1265, 1173, 766, 734, 698  $\text{cm}^{-1}$ . **HRMS** (APCI):  $m/z$  [M-H]<sup>-</sup> calcd for  $\text{C}_{19}\text{H}_{18}\text{O}_2\text{Cl}_2\text{F}$ : 367.0673; found 367.0674.

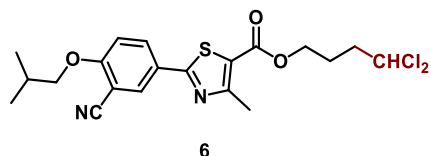

**4,4-dichlorobutyl** **2-(3-cyano-4-isobutoxyphenyl)-4-methylthiazole-5-carboxylate (6)** Following the general procedure A, the title product was obtained after purification by column chromatography (PE/EA = 10:1) as a white solid (39.6 mg, 0.090 mmol, 45%). **<sup>1</sup>H NMR** (400 MHz,  $\text{CDCl}_3$ )  $\delta$  8.19 (d,  $J$  = 2.3 Hz, 1H), 8.10 (dd,  $J$  =

8.9, 2.3 Hz, 1H), 7.02 (d,  $J$  = 8.9 Hz, 1H), 5.87 (t,  $J$  = 5.8 Hz, 1H), 4.37 (t,  $J$  = 6.2 Hz, 2H), 3.90 (d,  $J$  = 6.5 Hz, 2H), 2.77 (s, 3H), 2.43 – 2.33 (m, 2H), 2.26 – 2.16 (m, 1H), 2.13 – 2.00 (m, 2H), 1.10 (d,  $J$  = 6.7 Hz, 6H). **<sup>13</sup>C NMR** (101 MHz,  $\text{CDCl}_3$ )  $\delta$  167.6, 162.7, 162.0, 161.7, 132.7, 132.3, 125.9, 121.4, 115.5, 112.7, 103.1, 72.9, 64.1, 40.3, 28.3, 25.3, 19.2, 17.7. **IR** (ATR): 2923, 1712, 1606, 1509, 1261, 1106, 1012, 736  $\text{cm}^{-1}$ . **HRMS** (APCI):  $m/z$  [M+H]<sup>+</sup> calcd for  $\text{C}_{20}\text{H}_{23}\text{O}_3\text{N}_2\text{Cl}_2\text{S}^+$ : 441.0801; found 441.0802. **Melting Point** (Experimental): 100 – 102 °C

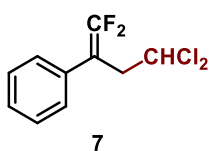

**(4,4-dichloro-1,1-difluorobut-1-en-2-yl)benzene (7)** Following the general procedure A, the title product was obtained after purification by column chromatography (PE/EA = 20:1) as a colorless oil (22.7 mg, 0.096 mmol, 48%). **<sup>1</sup>H NMR** (400 MHz,  $\text{CDCl}_3$ )  $\delta$  7.46 – 7.27 (m, 5H), 5.51 (t,  $J$  = 6.8 Hz, 1H), 3.29 (dt,  $J$  = 6.8, 2.0 Hz, 2H). **<sup>13</sup>C NMR** (101 MHz,  $\text{CDCl}_3$ )  $\delta$  155.2 (t,  $J$  = 292.9 Hz), 131.6 (t,  $J$  = 3.4 Hz), 129.0, 128.5 (t,  $J$  = 3.0 Hz), 128.3, 89.0 (dd,  $J$  = 20.5 Hz, 18.8 Hz), 70.5 (t,  $J$  = 4.8 Hz), 42.4 (d,  $J$  = 2.6 Hz). **<sup>19</sup>F NMR** (376 MHz,  $\text{CDCl}_3$ )  $\delta$  -87.7 (d,  $J$  = 34.8 Hz, 1F), -88.4 (d,  $J$  = 34.8 Hz, 1F). **IR** (ATR): 2923, 1737, 1247, 1125, 985, 794, 757, 714, 697  $\text{cm}^{-1}$ . **HRMS** (ESI):  $m/z$  [M+K]<sup>+</sup> calcd for  $\text{C}_{10}\text{H}_8\text{F}_2\text{Cl}_3\text{K}^+$ : 274.9603; found 274.9608.

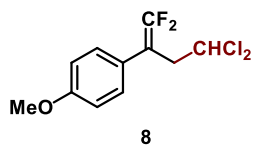

**1-(4,4-dichloro-1,1-difluorobut-1-en-2-yl)-4-methoxybenzene (8)** Following the general procedure A, the title product was obtained after purification by column chromatography (PE/EA = 20:1) as a yellow oil (36.9 mg, 0.138 mmol, 69%). **<sup>1</sup>H NMR** (500 MHz,  $\text{CDCl}_3$ )  $\delta$  7.24 – 7.19 (m, 2H), 6.94 – 6.87 (m, 2H), 5.51 (t,  $J$  = 6.8 Hz, 1H), 3.82 (s, 3H), 3.25 (dt,  $J$  = 6.8, 2.1 Hz, 2H). **<sup>13</sup>C NMR** (126 MHz,  $\text{CDCl}_3$ )  $\delta$  159.5, 155.1 (t,  $J$  = 363.8 Hz), 129.7 (t,  $J$  = 3.2 Hz), 123.6 (t,  $J$  = 3.5 Hz), 114.5, 88.5 (dd,  $J$  = 20.9 Hz, 19.1 Hz), 70.6 (t,  $J$  = 4.5 Hz), 55.43, 42.6 (d,  $J$  = 2.5 Hz). **<sup>19</sup>F NMR** (471 MHz,  $\text{CDCl}_3$ )  $\delta$  -88.6 (d,  $J$  = 36.2 Hz, 1F), -89.3 (d,  $J$  = 36.2 Hz, 1F). **IR** (ATR): 2915, 1732, 1611, 1513, 1242, 1179, 983, 832, 684  $\text{cm}^{-1}$ . **HRMS** (APCI):  $m/z$  [M+H]<sup>+</sup> calcd for  $\text{C}_{11}\text{H}_{11}\text{OCl}_2\text{F}_2^+$ : 267.0149; found 267.0152.

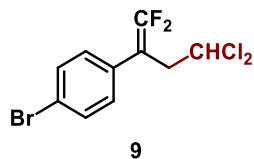

**1-bromo-4-(4,4-dichloro-1,1-difluorobut-1-en-2-yl)benzene (9)** Following the general procedure A, the title product was obtained after purification by column chromatography (PE/EA = 20:1) as a colorless oil (31.4 mg, 0.100 mmol, 50%). **<sup>1</sup>H NMR** (500 MHz, CDCl<sub>3</sub>) δ 7.57 – 7.47 (m, 2H), 7.22 – 7.14 (m, 2H), 5.51 (t, *J* = 6.8 Hz, 1H), 3.26 (dt, *J* = 6.8, 2.1 Hz, 2H). **<sup>13</sup>C NMR** (126 MHz, CDCl<sub>3</sub>) δ 155.2 (t, *J* = 292.8 Hz), 132.2, 130.6 (t, *J* = 3.4 Hz), 130.1 (t, *J* = 3.1 Hz), 122.40, 88.3 (dd, *J* = 21.1 Hz, 18.2 Hz), 70.3 (t, *J* = 4.1 Hz), 42.2 (d, *J* = 2.3 Hz). **<sup>19</sup>F NMR** (471 MHz, CDCl<sub>3</sub>) δ -86.5 (d, *J* = 31.2 Hz, 1F), -87.4 (d, *J* = 31.2 Hz, 1F). **IR** (ATR): 2915, 1728, 1489, 1316, 1249, 983, 828, 729, 583 cm<sup>-1</sup>. **HRMS** (ESI): *m/z* [M+OH]<sup>-</sup> calcd for C<sub>10</sub>H<sub>8</sub>BrF<sub>2</sub>Cl<sub>2</sub>O<sup>-</sup>: 330.9109; found 330.9126.

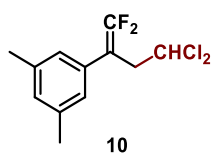

**1-(4,4-dichloro-1,1-difluorobut-1-en-2-yl)-3,5-dimethylbenzene (10)** Following the general procedure A, the title product was obtained after purification by column chromatography (PE/EA = 100:1) as a colorless oil (27.6 mg, 0.104 mmol, 52%). **<sup>1</sup>H NMR** (400 MHz, CDCl<sub>3</sub>) δ 6.88 (s, 1H), 6.82 (s, 2H), 5.42 (t, *J* = 6.8 Hz, 1H), 3.17 (dt, *J* = 6.8, 2.1 Hz, 2H), 2.25 (s, 6H). **<sup>13</sup>C NMR** (126 MHz, CDCl<sub>3</sub>) δ 155.2 (t, *J* = 291.3 Hz), 138.6, 131.4 (t, *J* = 3.3 Hz), 130.0, 126.3 (t, *J* = 3.0 Hz), 89.0 (t, *J* = 19.5 Hz), 70.6 (t, *J* = 4.7 Hz), 42.6 (d, *J* = 2.5 Hz), 21.4. **<sup>19</sup>F NMR** (376 MHz, CDCl<sub>3</sub>) δ -88.3 (d, *J* = 34.4 Hz, 1F), -88.6 (d, *J* = 33.8 Hz, 1F). **IR** (ATR): 2957, 1737, 1604, 1261, 1213, 1126, 765, 704, 672 cm<sup>-1</sup>. **HRMS** (APCI): *m/z* [M+H]<sup>+</sup> calcd for C<sub>12</sub>H<sub>13</sub>F<sub>2</sub>Cl<sub>2</sub><sup>+</sup>: 265.0368; found 265.0370.

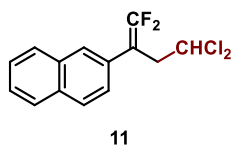

**2-(4,4-dichloro-1,1-difluorobut-1-en-2-yl)naphthalene (11)** Following the general procedure A, the title product was obtained after purification by column chromatography (PE/EA = 100:1) as a colorless oil (32.2 mg, 0.112 mmol, 56%). **<sup>1</sup>H NMR** (400 MHz, CDCl<sub>3</sub>) δ 7.89 – 7.76 (m, 4H), 7.56 – 7.48 (m, 2H), 7.42 – 7.39 (m, 1H), 5.53 (t, *J* = 6.8 Hz, 1H), 3.38 (dt, *J* = 6.9, 2.1 Hz, 2H). **<sup>13</sup>C NMR** (101 MHz, CDCl<sub>3</sub>) δ 155.5 (t, *J* = 293.2 Hz), 133.3, 132.9, 128.9 (t, *J* = 3.3 Hz), 128.8, 128.1, 127.9 (t, *J* = 2.7 Hz), 127.8, 126.8, 125.9 (t, *J* = 2.9 Hz), 89.1 (dd, *J* = 20.8 Hz, 18.3 Hz), 70.6 (t, *J* = 4.2 Hz), 42.5 (d, *J* = 2.5 Hz). **<sup>19</sup>F NMR** (376 MHz, CDCl<sub>3</sub>) δ -87.2 (d, *J* = 30.4 Hz, 1F), -88.1 (d, *J* = 30.4 Hz, 1F). **IR** (ATR): 3070, 2953, 1728, 1253, 1230, 1111, 817, 746, 686, 476 cm<sup>-1</sup>. **HRMS** (ESI): *m/z* [M+Na]<sup>+</sup> calcd for C<sub>14</sub>H<sub>10</sub>F<sub>2</sub>Cl<sub>2</sub>Na<sup>+</sup>: 309.0020; found 309.0018.

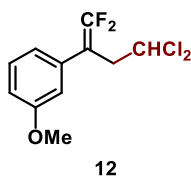

**1-(4,4-dichloro-1,1-difluorobut-1-en-2-yl)-3-methoxybenzene (12)** Following the general procedure A, the title product was obtained after purification by column chromatography (PE/EA = 100:1) as a yellow oil (32.6 mg, 0.122 mmol, 61%). **<sup>1</sup>H NMR** (400 MHz, CDCl<sub>3</sub>) δ 7.33 – 7.29 (m, 1H), 6.90 – 6.82 (m, 3H), 5.52 (t, *J* = 6.8 Hz, 1H), 3.82 (s, 3H), 3.26 (dt, *J* = 6.8, 2.0 Hz, 2H). **<sup>13</sup>C NMR** (101 MHz, CDCl<sub>3</sub>) δ 159.9, 155.2 (t, *J* = 292.5 Hz), 132.9 (t, *J* = 2.9 Hz), 130.1, 120.8 (t, *J* = 2.8 Hz), 114.6 (t, *J* = 3.2 Hz), 113.4, 88.9 (dd, *J* = 20.6 Hz, 19.1 Hz), 70.5 (t, *J* = 4.4 Hz), 55.4, 42.4 (d, *J* = 2.4 Hz). **<sup>19</sup>F NMR** (376 MHz, CDCl<sub>3</sub>) δ -87.5 (d, *J* = 33.5 Hz, 1F), -87.8 (d, *J* = 33.5 Hz,

1F). **IR** (ATR): 2937, 2851, 1735, 1580, 1255, 1223, 785, 703, 671  $\text{cm}^{-1}$ . **HRMS** (APCI):  $m/z$   $[\text{M}+\text{H}]^+$  calcd for  $\text{C}_{11}\text{H}_{11}\text{OCl}_2\text{F}_2^+$ : 267.0149; found 267.0152.

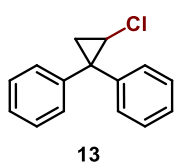

13

**(2-chlorocyclopropane-1,1-diyl)dibenzene (13)** Following the general procedure B, the title product was obtained after purification by column chromatography (PE) as a colorless oil (39.8 mg, 0.174 mmol, 87%).  **$^1\text{H}$  NMR** (400 MHz,  $\text{CDCl}_3$ )  $\delta$  7.44 – 7.38 (m, 2H), 7.37 – 7.31 (m, 2H), 7.29 – 7.19 (m, 6H), 3.73 (dd,  $J = 7.5, 4.6$  Hz, 1H), 1.83 – 1.69 (m, 2H).  **$^{13}\text{C}$  NMR** (126 MHz,  $\text{CDCl}_3$ )  $\delta$  144.3, 139.7, 130.7, 128.7, 128.4, 127.8, 127.2, 126.8, 39.5, 37.0, 23.8. **IR** (ATR): 3027, 2925, 1600, 1495, 1446, 758, 695, 610, 546  $\text{cm}^{-1}$ . **HRMS** (APCI):  $m/z$   $[\text{M}+\text{H}]^+$  calcd for  $\text{C}_{15}\text{H}_{14}\text{Cl}$ : 229.0778; found 229.0781.

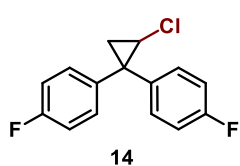

14

**4,4'-(2-chlorocyclopropane-1,1-diyl)bis(fluorobenzene) (14)** Following the general procedure B, the title product was obtained after purification by column chromatography (PE) as a colorless oil (42.2 mg, 0.160 mmol, 80%).  **$^1\text{H}$  NMR** (500 MHz,  $\text{CDCl}_3$ )  $\delta$  7.37 – 7.31 (m, 2H), 7.20 – 7.14 (m, 2H), 7.06 – 6.99 (m, 2H), 6.97 – 6.91 (m, 2H), 3.67 (dd,  $J = 7.7, 4.5$  Hz, 1H), 1.74 (dd,  $J = 7.7, 6.5$  Hz, 1H), 1.69 (dd,  $J = 6.5, 4.5$  Hz, 1H).  **$^{13}\text{C}$  NMR** (126 MHz,  $\text{CDCl}_3$ )  $\delta$  162.0 (d,  $J = 246.7$  Hz), 161.7 (d,  $J = 246.6$  Hz), 139.9 (d,  $J = 3.3$  Hz), 135.5 (d,  $J = 3.2$  Hz), 132.1 (d,  $J = 8.0$  Hz), 129.4 (d,  $J = 8.1$  Hz), 115.6 (d,  $J = 27.7$  Hz), 115.4 (d,  $J = 27.4$  Hz), 39.4, 35.8, 24.0.  **$^{19}\text{F}$  NMR** (471 MHz,  $\text{CDCl}_3$ )  $\delta$  -115.01 (t,  $J = 6.6$  Hz), -115.46 (t,  $J = 6.6$  Hz). **IR** (ATR): 3042, 1603, 1506, 1218, 1157, 825, 579, 549  $\text{cm}^{-1}$ . **HRMS** (APCI):  $m/z$   $[\text{M}+\text{H}]^+$  calcd for  $\text{C}_{15}\text{H}_{12}\text{F}_2\text{Cl}$ : 265.0590; found 265.0593.

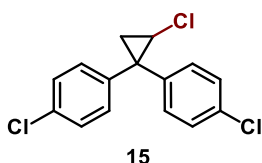

15

**4,4'-(2-chlorocyclopropane-1,1-diyl)bis(chlorobenzene) (15)** Following the general procedure B, the title product was obtained after purification by column chromatography (PE) as a white solid (50.6 mg, 0.170 mmol, 85%).  **$^1\text{H}$  NMR** (500 MHz,  $\text{CDCl}_3$ )  $\delta$  7.35 – 7.28 (m, 4H), 7.26 – 7.20 (m, 2H), 7.16 – 7.10 (m, 2H), 3.68 (dd,  $J = 7.6, 4.6$  Hz, 1H), 1.75 (dd,  $J = 7.6, 6.5$  Hz, 1H), 1.71 (dd,  $J = 6.5, 4.6$  Hz, 1H).  **$^{13}\text{C}$  NMR** (126 MHz,  $\text{CDCl}_3$ )  $\delta$  142.3, 137.9, 133.4, 132.9, 131.9, 129.1, 129.0, 128.8, 39.2, 36.0, 24.0. **IR** (ATR): 3025, 2923, 1491, 1090, 1011, 807, 634, 645, 502  $\text{cm}^{-1}$ . **HRMS** (APCI):  $m/z$   $[\text{M}+\text{H}]^+$  calcd for  $\text{C}_{15}\text{H}_{12}\text{Cl}_3$ : 296.9999; found 297.0007.

The crystal suitable for X-ray analysis was prepared by slow evaporation of the solvent of the solution of **15** in PE about  $-8$   $^{\circ}\text{C}$ .

The crystal structure has been deposited at the Cambridge Crystallographic Date Center and allocated the deposition numbers CCDC 2211598.

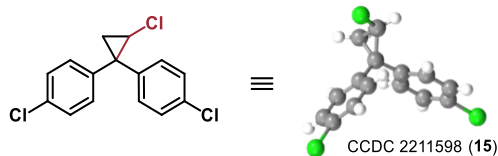



---

The following ALERTS were generated. Each ALERT has the format  
**test-name\_ALERT\_alert-type\_alert-level**.  
Click on the hyperlinks for more details of the test.

---

● **Alert level C**

|                   |                                                                |              |  |
|-------------------|----------------------------------------------------------------|--------------|--|
| PLAT340_ALERT_3_C | Low Bond Precision on C-C Bonds .....                          | 0.00659 Ang. |  |
| PLAT790_ALERT_4_C | Centre of Gravity not Within Unit Cell: Resd. #<br>C15 H11 C13 | 1 Note       |  |
| PLAT911_ALERT_3_C | Missing FCF Refl Between Thmin & STh/L= 0.600                  | 15 Report    |  |
| PLAT913_ALERT_3_C | Missing # of Very Strong Reflections in FCF ....               | 7 Note       |  |

---

● **Alert level G**

|                   |                                                                |             |  |
|-------------------|----------------------------------------------------------------|-------------|--|
| PLAT045_ALERT_1_G | Calculated and Reported Z Differ by a Factor ...               | 2 Check     |  |
| PLAT790_ALERT_4_G | Centre of Gravity not Within Unit Cell: Resd. #<br>C15 H11 C13 | 2 Note      |  |
| PLAT792_ALERT_1_G | Model has Chirality at C13 (Polar SPGR)                        | R Verify    |  |
| PLAT792_ALERT_1_G | Model has Chirality at C27 (Polar SPGR)                        | R Verify    |  |
| PLAT883_ALERT_1_G | No Info/Value for _atom_sites_solution_primary .               | Please Do ! |  |
| PLAT912_ALERT_4_G | Missing # of FCF Reflections Above STh/L= 0.600                | 1 Note      |  |
| PLAT978_ALERT_2_G | Number C-C Bonds with Positive Residual Density.               | 3 Info      |  |

---

0 **ALERT level A** = Most likely a serious problem - resolve or explain  
0 **ALERT level B** = A potentially serious problem, consider carefully  
4 **ALERT level C** = Check. Ensure it is not caused by an omission or oversight  
7 **ALERT level G** = General information/check it is not something unexpected

4 ALERT type 1 CIF construction/syntax error, inconsistent or missing data  
1 ALERT type 2 Indicator that the structure model may be wrong or deficient  
3 ALERT type 3 Indicator that the structure quality may be low  
3 ALERT type 4 Improvement, methodology, query or suggestion  
0 ALERT type 5 Informative message, check

---

It is advisable to attempt to resolve as many as possible of the alerts in all categories. Often the minor alerts point to easily fixed oversights, errors and omissions in your CIF or refinement strategy, so attention to these fine details can be worthwhile. In order to resolve some of the more serious problems it may be necessary to carry out additional measurements or structure refinements. However, the purpose of your study may justify the reported deviations and the more serious of these should normally be commented upon in the discussion or experimental section of a paper or in the "special\_details" fields of the CIF. checkCIF was carefully designed to identify outliers and unusual parameters, but every test has its limitations and alerts that are not important in a particular case may appear. Conversely, the absence of alerts does not guarantee there are no aspects of the results needing attention. It is up to the individual to critically assess their own results and, if necessary, seek expert advice.

### Publication of your CIF in IUCr journals

A basic structural check has been run on your CIF. These basic checks will be run on all CIFs submitted for publication in IUCr journals (*Acta Crystallographica*, *Journal of Applied Crystallography*, *Journal of Synchrotron Radiation*); however, if you intend to submit to *Acta Crystallographica Section C* or *E* or *IUCrData*, you should make sure that full publication checks are run on the final version of your CIF prior to submission.

### Publication of your CIF in other journals

Please refer to the *Notes for Authors* of the relevant journal for any special instructions relating to CIF submission.

---

PLATON version of 12/09/2022; check.def file version of 09/08/2022

Datablock 2\_pl - ellipsoid plot

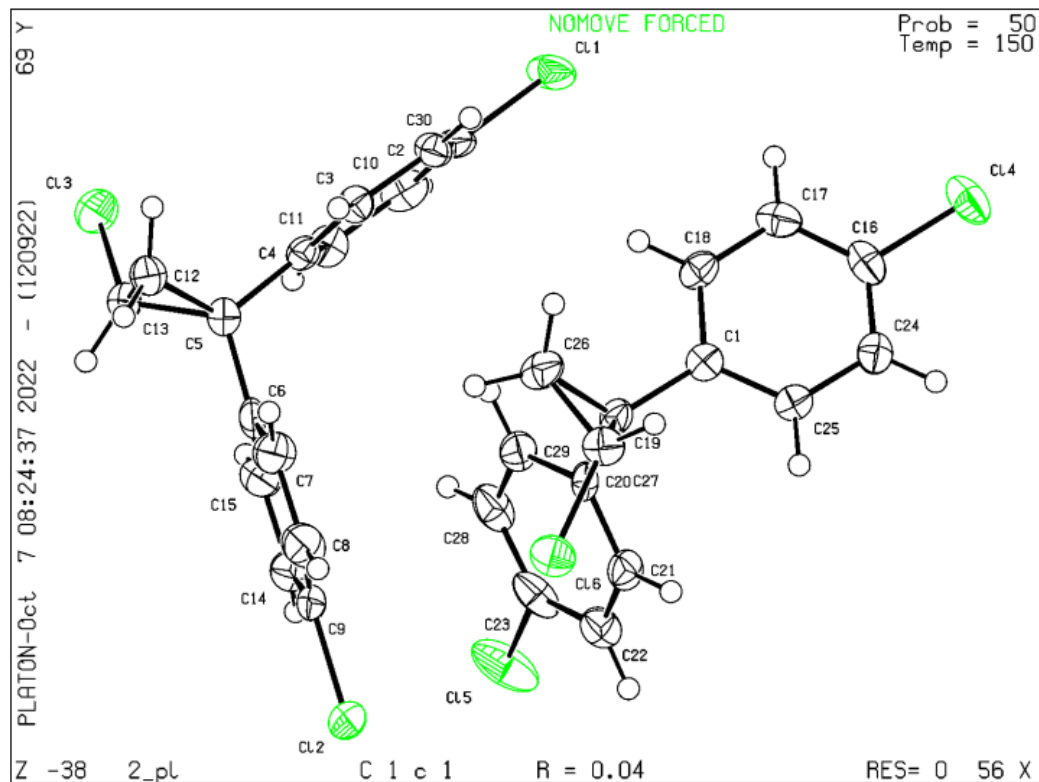

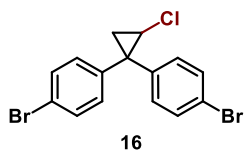

**4,4'-(2-chlorocyclopropane-1,1-diyl)bis(bromobenzene) (16)** Following the general procedure B, the title product was obtained after purification by column chromatography (PE) as a white solid (48.7 mg, 0.126 mmol, 63%). **<sup>1</sup>H NMR** (400 MHz, CDCl<sub>3</sub>) δ 7.50 – 7.44 (m, 2H), 7.41 – 7.35 (m, 2H), 7.27 – 7.22 (m, 2H), 7.09 – 7.04 (m, 2H), 3.67 (dd, *J* = 7.6, 4.6 Hz, 1H), 1.83 – 1.65 (m, 2H). **<sup>13</sup>C NMR** (101 MHz, CDCl<sub>3</sub>) δ 142.7, 138.3, 132.3, 131.9, 131.7, 129.5, 121.6, 121.0, 39.1, 36.1, 23.9. **IR** (ATR): 3083, 2925, 1600, 1495, 1446, 758, 695, 610, 546 cm<sup>-1</sup>. **Elem. Anal.** calcd for C<sub>15</sub>H<sub>11</sub>Br<sub>2</sub>Cl (386.51): C, 46.61; H, 2.87. found C, 46.64; H, 2.98.

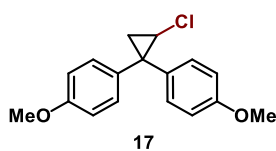

**4,4'-(2-chlorocyclopropane-1,1-diyl)bis(methoxybenzene) (17)** Following the general procedure B, the title product was obtained after purification by column chromatography (PE/EA = 5:1) as a white wax (43.9 mg, 0.152 mmol, 76%). **<sup>1</sup>H NMR** (500 MHz, CDCl<sub>3</sub>) δ 7.30 (d, *J* = 8.7 Hz, 2H), 7.13 (d, *J* = 8.7 Hz, 2H), 6.87 (d, *J* = 8.7 Hz, 2H), 6.78 (d, *J* = 8.7 Hz, 2H), 3.79 (s, 3H), 3.75 (s, 3H), 3.66 (dd, *J* = 7.6, 4.5 Hz, 1H), 1.71 (dd, *J* = 7.6, 6.3 Hz, 1H), 1.66 (dd, *J* = 6.3, 4.5 Hz, 1H). **<sup>13</sup>C NMR** (126 MHz, CDCl<sub>3</sub>) δ 158.6, 158.3, 136.9, 132.4, 131.5, 128.8, 114.1, 113.8, 55.4, 55.3, 39.8, 35.7, 23.8. **IR** (ATR): 2921, 2850, 1610, 1512, 1290, 1247, 1179, 1032, 829, 558 cm<sup>-1</sup>. **HRMS** (APCI): *m/z* [M+H]<sup>+</sup> calcd for C<sub>17</sub>H<sub>18</sub>O<sub>2</sub>Cl<sup>+</sup>: 289.0989; found 289.0991.

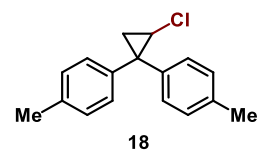

**4,4'-(2-chlorocyclopropane-1,1-diyl)bis(methylbenzene) (18)** Following the general procedure B, the title product was obtained after purification by column chromatography (PE) as a colorless oil (40.1 mg, 0.156 mmol, 78%). **<sup>1</sup>H NMR** (400 MHz, CDCl<sub>3</sub>) δ 7.32 – 7.25 (m, 2H), 7.17 – 7.02 (m, 6H), 3.69 (dd, *J* = 7.4, 4.7 Hz, 1H), 2.32 (s, 3H), 2.27 (s, 3H), 1.74 – 1.68 (m, 2H). **<sup>13</sup>C NMR** (101 MHz, CDCl<sub>3</sub>) δ 141.7, 137.0, 136.8, 136.4, 130.4, 129.4, 129.1, 127.7, 39.6, 36.4, 23.7, 21.3, 21.1. **IR** (ATR): 2988, 2921, 1513, 1407, 1044, 809, 727, 693, 582, 546 cm<sup>-1</sup>. **HRMS** (ESI): *m/z* [M+Na]<sup>+</sup> calcd for C<sub>17</sub>H<sub>17</sub>ClNa<sup>+</sup>: 279.0911; found 279.0920.

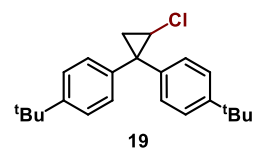

**4,4'-(2-chlorocyclopropane-1,1-diyl)bis(tert-butylbenzene) (19)** Following the general procedure B, the title product was obtained after purification by column chromatography (PE) as a white solid (55.2 mg, 0.162 mmol, 81%). **<sup>1</sup>H NMR** (400 MHz, CDCl<sub>3</sub>) δ 7.41 – 7.33 (m, 4H), 7.31 – 7.27 (m, 2H), 7.18 – 7.14 (m, 2H), 3.69 (dd, *J* = 7.6, 4.5 Hz, 1H), 1.79 (dd, *J* = 7.6, 6.3 Hz, 1H), 1.71 (dd, *J* = 6.3, 4.5 Hz, 1H), 1.33 (s, 9H), 1.29 (s, 9H). **<sup>13</sup>C NMR** (101 MHz, CDCl<sub>3</sub>) δ 149.8, 149.5, 141.6, 136.8, 130.2, 127.4, 125.6, 125.3, 39.9, 36.2, 34.6, 34.5, 31.5, 31.4, 23.8. **IR** (ATR): 2962, 2902, 2866, 1509, 1462, 1401, 1362, 1266, 1031, 834 cm<sup>-1</sup>. **HRMS** (ESI): *m/z* [M+Na]<sup>+</sup> calcd for C<sub>23</sub>H<sub>29</sub>ClNa<sup>+</sup>: 363.1850; found 363.1853. **Melting Point** (Experimental): 102 – 104 °C



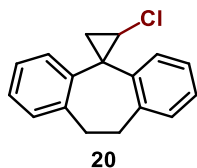

**2-chloro-10',11'-dihydrospiro[cyclopropane-1,5'-dibenzo[a,d][7]annulene] (20)**

Following the general procedure B, the title product was obtained after purification by column chromatography (PE/EA = 10:1) as a colorless oil (38.2 mg, 0.15 mmol, 75%). **<sup>1</sup>H NMR** (500 MHz, CDCl<sub>3</sub>) δ 7.25 – 7.05 (m, 8H), 3.81 – 3.62 (m, 2H), 3.31 (dd, *J* = 7.7, 4.3 Hz, 1H), 3.04 – 2.82 (m, 2H), 2.11 (t, *J* = 7.4 Hz, 1H), 1.79 (dd, *J* = 7.1, 4.3 Hz, 1H). **<sup>13</sup>C NMR** (126 MHz, CDCl<sub>3</sub>) δ 140.8, 140.6 (2C), 137.4, 130.2, 129.9, 128.5, 127.7, 127.5, 126.6, 126.3, 126.0, 42.0, 35.4, 32.4, 31.8, 19.5. **IR** (ATR): 3063, 3018, 2932, 2897, 1487, 1446, 1305, 752, 688, 447 cm<sup>-1</sup>. **HRMS** (ESI): *m/z* [M+Na]<sup>+</sup> calcd for C<sub>17</sub>H<sub>15</sub>ClNa<sup>+</sup>: 277.0755; found 230.0745.

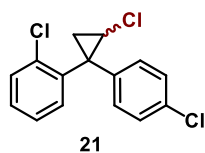

**1-chloro-2-(2-chloro-1-(4-chlorophenyl)cyclopropyl)benzene (21)**

Following the general procedure B, the title product was obtained after purification by column chromatography (PE) as a colorless oil (51.8 mg, 0.174 mmol, 87%, d:r = 2:1). **<sup>1</sup>H NMR** (400 MHz, CDCl<sub>3</sub>) (mixture of diastereomers) δ 7.56 – 7.56 (m, 1H), 7.42 – 7.28 (m, 3H), 7.22 – 7.20 (m, 2H), 7.07 – 7.05 (m, 2H), 3.82 – 3.74 (m, 1H), 1.86 – 1.91 (m, 1H), 1.76 – 1.71 (m, 1H). **<sup>13</sup>C NMR** (101 MHz, CDCl<sub>3</sub>) (mixture of diastereomers) δ 140.8, 140.7, 136.9, 136.8, 136.7, 135.4, 133.3, 133.0, 132.5, 131.5, 131.4, 130.5, 129.8, 129.2, 128.9, 128.7, 128.4, 128.3, 127.3, 126.9, 40.1, 39.6, 35.5, 34.7, 26.0, 23.0. **IR** (ATR): 3057, 2988, 2901, 1490, 1432, 1094, 1038, 1012, 817, 755 cm<sup>-1</sup>. **HRMS** (APCI): *m/z* [M+H]<sup>+</sup> calcd for C<sub>15</sub>H<sub>12</sub>Cl<sub>3</sub><sup>+</sup>: 296.9999; found 297.0007.

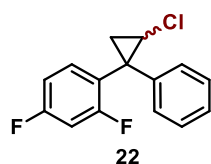

**1-(2-chloro-1-phenylcyclopropyl)-2,4-difluorobenzene (22)**

Following the general procedure B, the title product was obtained after purification by column chromatography (PE) as a colorless oil (38.1 mg, 0.144 mmol, 72%, d:r = 6:1). **<sup>1</sup>H NMR** (500 MHz, CDCl<sub>3</sub>) **major isomer:** δ 7.47 – 7.41 (m, 1H), 7.28 – 7.19 (m, 5H), 6.9 – 6.78 (m, 1H), 6.83 – 6.78 (m, 1H), 3.75 (dd, *J* = 7.6, 4.6 Hz, 1H), 1.84 (dd, *J* = 7.6, 6.6 Hz, 1H), 1.64 (dd, *J* = 6.6, 4.6 Hz, 1H); **minor isomer:** 7.41 – 7.36 (m, 1H), 7.33 – 7.30 (m, 3H), 7.18 – 7.16 (m, 3H), 6.76 – 6.69 (m, 1H), 3.67 (dd, *J* = 7.7, 4.5 Hz, 1H), 1.78 (dd, *J* = 6.7, 4.5 Hz, 1H), 1.69 (dd, *J* = 7.7, 6.6 Hz, 1H). **<sup>13</sup>C NMR** (126 MHz, CDCl<sub>3</sub>) **major isomer:** δ 163.5 (dd, *J* = 13.9, 12.7 Hz), 142.6, 133.3 (dd, *J* = 9.7, 5.5 Hz), 130.0, 128.8, 127.4, 123.5 (d, *J* = 3.8 Hz), 111.4 (d, *J* = 3.6 Hz), 111.2 (d, *J* = 3.8 Hz), 104.5 (t, *J* = 25.5 Hz), 38.8, 32.3, 24.6; **minor isomer:** 161.5 (dd, *J* = 17.0, 11.8 Hz), 139.0, 131.6 (dd, *J* = 9.6, 5.3 Hz), 129.1, 128.4, 127.1, 123.4 (d, *J* = 3.8 Hz), 111.7 (d, *J* = 3.6 Hz), 111.5 (d, *J* = 3.8 Hz), 104.5 (t, *J* = 25.5 Hz), 38.7, 32.2, 22.2. **<sup>19</sup>F NMR** (471 MHz, CDCl<sub>3</sub>) δ -108.56 – -108.61 (m, 1F), -110.63 – -110.70 (m, 1F). **IR** (ATR): 3026, 2923, 2361, 1598, 1504, 1423, 1139, 850, 695, 534 cm<sup>-1</sup>. **HRMS** (APCI): *m/z* [M+H]<sup>+</sup> calcd for C<sub>15</sub>H<sub>12</sub>F<sub>2</sub>Cl<sup>+</sup>: 265.0590; found 265.0593.



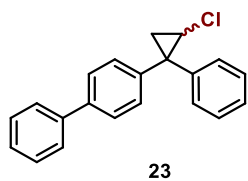

**4-(2-chloro-1-phenylcyclopropyl)-1,1'-biphenyl (23)** Following the general procedure B, the title product was obtained after purification by column chromatography (PE) as a yellow oil (49.4 mg, 0.162 mmol, 81%, d:r = 1.5:1). **<sup>1</sup>H NMR (500 MHz, CDCl<sub>3</sub>) (mixture of diastereomers)** δ 7.59 – 7.27 (m, 14H), 3.77 – 3.74 (m, 1H), 1.84 – 1.80 (m, 1H), 1.79 – 1.76 (m, 1H). **<sup>13</sup>C NMR (126 MHz, CDCl<sub>3</sub>) (mixture of diastereomers)** δ 144.3, 143.4, 140.9, 140.7, 140.0, 139.8, 139.7, 138.9, 131.0, 130.8, 128.91, 128.86, 128.8, 128.5, 128.2, 128.0, 127.47, 127.45, 127.4, 127.3, 127.22, 127.15, 126.9, 39.6, 36.84, 36.78, 24.0, 23.8. **IR (ATR):** 3027, 2360, 1599, 1486, 1446, 836, 760, 730, 693 cm<sup>-1</sup>. **HRMS (APCI):** *m/z* [M+H]<sup>+</sup> calcd for C<sub>21</sub>H<sub>18</sub>Cl<sup>+</sup>: 305.1091; found 305.1093.

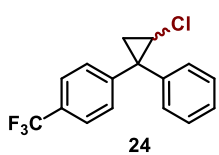

**1-(2-chloro-1-phenylcyclopropyl)-4-(trifluoromethyl)benzene (24)** Following the general procedure B, the title product was obtained after purification by column chromatography (PE) as a colorless oil (40.8 mg, 0.138 mmol, 69%, d:r = 3:1). **<sup>1</sup>H NMR (500 MHz, CDCl<sub>3</sub>) (mixture of diastereomers)** δ 7.61 – 7.50 (m, 2H), 7.42 – 7.34 (m, 3H), 7.34 – 7.26 (m, 3H), 7.24 – 7.19 (m, 1H), 3.80 – 3.71 (m, 1H), 1.88 – 1.73 (m, 2H). **<sup>13</sup>C NMR (126 MHz, CDCl<sub>3</sub>) (mixture of diastereomers)** δ 148.3, 143.8, 143.4, 138.8, 131.0, 130.8, 129.0, 128.8 (q, *J* = 32.7 Hz), 128.7, 128.1, 128.0, 127.7, 127.2, 125.7 (q, *J* = 3.6 Hz), 125.4 (q, *J* = 3.8 Hz), 124.2 (q, *J* = 272.6 Hz) 39.4, 39.2, 37.0, 36.8, 24.2, 23.8. **<sup>19</sup>F NMR (471 MHz, CDCl<sub>3</sub>) (mixture of diastereomers)** δ -62.1 (s, 3F), -62.2 (s, 3F). **IR (ATR):** 2957, 2361, 1598, 1504, 1424, 1269, 1139, 850, 695 cm<sup>-1</sup>. **HRMS (APCI):** *m/z* [M+H]<sup>+</sup> calcd for C<sub>21</sub>H<sub>18</sub>Cl<sup>+</sup>: 305.1091; found 305.1093.

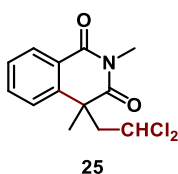

**4-(2,2-dichloroethyl)-2,4-dimethylisoquinoline-1,3(2H,4H)-dione (25)** Following the general procedure A, the title product was obtained after purification by column chromatography (PE/EA = 5:1) as a white solid (41.0 mg, 0.144 mmol, 72%). **<sup>1</sup>H NMR (400 MHz, CDCl<sub>3</sub>)** δ 8.31 (dd, *J* = 7.9, 1.5 Hz, 1H), 7.71 (td, *J* = 7.6, 1.6 Hz, 1H), 7.53 - 7.49 (m, 1H), 7.41 - 7.39 (m, 1H), 5.20 (dd, *J* = 10.0, 3.9 Hz, 1H), 3.49 (dd, *J* = 14.8, 10.0 Hz, 1H), 3.39 (s, 3H), 2.87 (dd, *J* = 14.8, 3.9 Hz, 1H), 1.65 (s, 3H). **<sup>13</sup>C NMR (101 MHz, CDCl<sub>3</sub>)** δ 175.3, 163.9, 140.7, 134.4, 129.7, 128.3, 125.3, 125.1, 69.7, 53.3, 46.3, 31.7, 27.6. **IR (ATR):** 2935, 1713, 1661, 1467, 1317, 1058, 1431, 775, 703, 560 cm<sup>-1</sup>. **HRMS (APCI):** *m/z* [M+H]<sup>+</sup> calcd for C<sub>13</sub>H<sub>14</sub>NO<sub>2</sub>Cl<sub>2</sub><sup>+</sup>: 286.0396; found 286.04398.

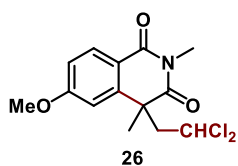

**4-(2,2-dichloroethyl)-6-methoxy-2,4-dimethylisoquinoline-1,3(2H,4H)-dione (26)** Following the general procedure A, the title product was obtained after purification by column chromatography (PE/EA = 5:1) as a colorless oil (41.1 mg, 0.130 mmol, 65%). **<sup>1</sup>H NMR (500 MHz, CDCl<sub>3</sub>)** δ 8.26 (d, *J* = 8.8 Hz, 1H), 7.02 (dd, *J* = 8.8, 2.4 Hz, 1H), 6.82 (d, *J* = 2.4 Hz, 1H), 5.27 (dd, *J* = 9.9, 3.9 Hz, 1H), 3.92 (s, 3H), 3.48 (dd, *J* = 14.8, 9.9 Hz, 1H), 3.36 (s, 3H), 2.82 (dd, *J* = 14.8, 3.9 Hz, 1H), 1.63 (s, 3H). **<sup>13</sup>C NMR (126 MHz, CDCl<sub>3</sub>)** δ 175.4, 164.4, 163.6, 142.9, 132.1, 118.0, 113.5,

110.9, 69.7, 55.8, 53.4, 46.5, 31.8, 27.4. **IR** (ATR): 2935, 1709, 1661, 1606, 1434, 1359, 1313, 780  $\text{cm}^{-1}$ . **HRMS** (APCI):  $m/z$   $[\text{M}+\text{H}]^+$  calcd for  $\text{C}_{14}\text{H}_{16}\text{NO}_3\text{Cl}_2^+$ : 316.0502; found 316.0504. **Melting Point** (Experimental): 158 – 160  $^\circ\text{C}$

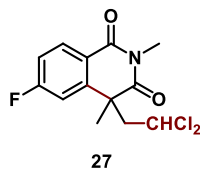

**4-(2,2-dichloroethyl)-6-fluoro-2,4-dimethylisoquinoline-1,3(2H,4H)-dione (27)**

Following the general procedure A, the title product was obtained after purification by column chromatography (PE/EA = 5:1) as a white solid (42.0 mg, 0.138 mmol, 69%).  **$^1\text{H NMR}$**  (400 MHz,  $\text{CDCl}_3$ )  $\delta$  8.34 (dd,  $J$  = 8.8, 5.8 Hz, 1H), 7.24 – 7.19 (m, 1H), 7.11 – 7.09 (m, 1H), 5.27 (dd,  $J$  = 9.6, 4.4 Hz, 1H), 3.49 (dd,  $J$  = 14.9, 9.6 Hz, 1H), 3.38 (s, 3H), 2.83 (dd,  $J$  = 14.9, 4.4 Hz, 1H), 1.65 (s, 3H).  **$^{13}\text{C NMR}$**  (101 MHz,  $\text{CDCl}_3$ )  $\delta$  174.8, 166.5 (d,  $J$  = 258.0 Hz), 162.9, 143.8 (d,  $J$  = 81.8 Hz), 132.8 (d,  $J$  = 9.8 Hz), 121.5 (d,  $J$  = 2.4 Hz), 116.3 (d,  $J$  = 22.2 Hz), 112.3 (d,  $J$  = 23.1 Hz), 69.4, 53.2, 46.6, 31.7, 27.6.  **$^{19}\text{F NMR}$**  (376 MHz,  $\text{CDCl}_3$ )  $\delta$  -102.2. **IR** (ATR): 2935, 1715, 1661, 1614, 1357, 1311, 1056, 780, 699  $\text{cm}^{-1}$ . **HRMS** (APCI):  $m/z$   $[\text{M}+\text{H}]^+$  calcd for  $\text{C}_{13}\text{H}_{13}\text{NO}_2\text{Cl}_2\text{F}^+$ : 304.0302; found 304.0305. **Melting Point** (Experimental): 108 – 110  $^\circ\text{C}$

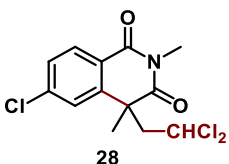

**6-chloro-4-(2,2-dichloroethyl)-2,4-dimethylisoquinoline-1,3(2H,4H)-dione (28)**

Following the general procedure A, the title product was obtained after purification by column chromatography (PE/EA = 5:1) as a white solid (31.9 mg, 0.100 mmol, 50%).  **$^1\text{H NMR}$**  (500 MHz,  $\text{CDCl}_3$ )  $\delta$  8.25 (d,  $J$  = 8.5 Hz, 1H), 7.49 (dd,  $J$  = 8.5, 1.9 Hz, 1H), 7.38 (d,  $J$  = 1.9 Hz, 1H), 5.27 (dd,  $J$  = 9.6, 4.4 Hz, 1H), 3.48 (dd,  $J$  = 14.9, 9.6 Hz, 1H), 3.38 (s, 3H), 2.84 (dd,  $J$  = 14.9, 4.4 Hz, 1H), 1.65 (s, 3H).  **$^{13}\text{C NMR}$**  (101 MHz,  $\text{CDCl}_3$ )  $\delta$  174.7, 163.1, 142.5, 141.0, 131.3, 128.9, 125.5, 123.5, 69.4, 53.1, 46.4, 31.7, 27.6. **IR** (ATR): 2935, 1713, 1660, 1597, 1427, 1354, 1057, 849, 780, 697  $\text{cm}^{-1}$ . **HRMS** (APCI):  $m/z$   $[\text{M}+\text{H}]^+$  calcd for  $\text{C}_{13}\text{H}_{13}\text{NO}_2\text{Cl}_3^+$ : 320.0006; found 320.0009. **Melting Point** (Experimental): 126 – 128  $^\circ\text{C}$

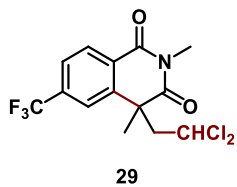

**4-(2,2-dichloroethyl)-2,4-dimethyl-6-(trifluoromethyl)isoquinoline-1,3(2H,4H)-dione (29)**

Following the general procedure A, the title product was obtained after purification by column chromatography (PE/EA = 5:1) as a yellow-white solid (39.7 mg, 0.112 mmol, 56%).  **$^1\text{H NMR}$**  (500 MHz,  $\text{CDCl}_3$ )  $\delta$  8.44 (d,  $J$  = 8.2 Hz, 1H), 7.76 (d,  $J$  = 8.2 Hz, 1H), 7.65 (s, 1H), 5.24 (dd,  $J$  = 9.1, 4.8 Hz, 1H), 3.51 (dd,  $J$  = 15.0, 9.1 Hz, 1H), 3.41 (s, 3H), 2.92 (dd,  $J$  = 14.9, 4.8 Hz, 1H), 1.68 (s, 3H).  **$^{13}\text{C NMR}$**  (126 MHz,  $\text{CDCl}_3$ )  $\delta$  174.5, 162.8, 141.8, 135.9 (q,  $J$  = 33.3 Hz), 130.6, 128.0, 125.9 (d,  $J$  = 3.4 Hz), 123.3 (q,  $J$  = 274.1 Hz), 122.5 (q,  $J$  = 4.1 Hz), 69.3, 53.1, 46.6, 31.7, 27.8.  **$^{19}\text{F NMR}$**  (376 MHz,  $\text{CDCl}_3$ )  $\delta$  -62.9. **IR** (ATR): 2935, 1716, 1665, 1431, 1272, 1128, 1076, 855, 789, 702  $\text{cm}^{-1}$ . **HRMS** (ESI):  $m/z$   $[\text{M}+\text{H}]^+$  calcd for  $\text{C}_{14}\text{H}_{13}\text{NO}_2\text{Cl}_2\text{F}_3^+$ : 354.0260; found 354.0270. **Melting Point** (Experimental): 73 – 75  $^\circ\text{C}$

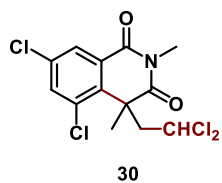

**5,7-dichloro-4-(2,2-dichloroethyl)-2,4-dimethylisoquinoline-1,3(2H,4H)-dione**

**(30)** Following the general procedure A, the title product was obtained after purification by column chromatography (PE/EA = 5:1) as a colorless oil (36.9 mg, 0.104 mmol, 52%).

**<sup>1</sup>H NMR** (500 MHz, CDCl<sub>3</sub>) δ 8.34 (d, *J* = 2.3 Hz, 1H), 7.70 (d, *J* = 2.3 Hz, 1H), 5.24 (dd, *J* = 10.6, 3.7 Hz, 1H), 3.71 (dd, *J* = 15.3, 3.7 Hz, 1H), 3.54 (dd, *J* = 15.3, 10.6 Hz, 1H), 3.40 (s, 3H), 1.79 (s, 3H). **<sup>13</sup>C NMR** (126 MHz, CDCl<sub>3</sub>) δ 175.3, 161.8, 136.6, 135.3, 135.1, 133.2, 129.3, 129.1, 70.2, 49.3, 47.7, 28.2, 26.8. **IR** (ATR): 2935, 1718, 1668, 1587, 1434, 1323, 1261, 1061, 728, 425 cm<sup>-1</sup>. **HRMS** (ESI): *m/z* [M+Na]<sup>+</sup> calcd for C<sub>13</sub>H<sub>11</sub>NO<sub>2</sub>Cl<sub>4</sub>Na<sup>+</sup>: 377.9391; found 377.9406.

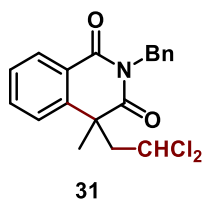

**2-benzyl-4-(2,2-dichloroethyl)-4-methylisoquinoline-1,3(2H,4H)-dione** **(31)**

Following the general procedure A, the title product was obtained after purification by column chromatography (PE/EA = 5:1) as a colorless oil (51.4 mg, 0.142 mmol, 71%).

**<sup>1</sup>H NMR** (400 MHz, CDCl<sub>3</sub>) δ 8.32 (dd, *J* = 8.0, 1.4 Hz, 1H), 7.76 – 7.65 (m, 1H), 7.54 – 7.34 (m, 3H), 7.31 – 7.26 (m, 3H), 7.24 (dd, *J* = 9.9, 4.2 Hz, 1H), 5.26 (d, *J* = 13.8 Hz, 1H), 5.15 (d, *J* = 13.8 Hz, 1H), 5.14 (dd, *J* = 9.9, 4.2 Hz 1H), 3.48 (dd, *J* = 14.8, 9.9 Hz, 1H), 2.86 (dd, *J* = 14.8, 4.2 Hz, 1H), 1.62 (s, 3H). **<sup>13</sup>C NMR** (101 MHz, CDCl<sub>3</sub>) δ 175.0, 163.7, 140.8, 136.7, 134.4, 130.0, 129.2, 128.5, 128.3, 127.7, 125.3, 125.1, 69.6, 52.9, 46.5, 44.1, 32.0. **IR** (ATR): 3065, 2923, 1713, 1667, 1466, 1385, 1352, 1159, 737, 707 cm<sup>-1</sup>. **HRMS** (APCI): *m/z* [M+H]<sup>+</sup> calcd for C<sub>19</sub>H<sub>18</sub>NO<sub>2</sub>Cl<sub>2</sub><sup>+</sup>: 362.0709; found 362.0709.

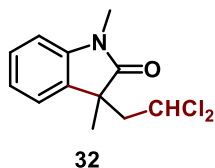

**3-(2,2-dichloroethyl)-1,3-dimethylindolin-2-one** **(32)**

Following the general procedure A, the title product was obtained after purification by column chromatography

(PE/EA = 5:1) as a colorless oil (44.2 mg, 0.172 mmol, 86%). **<sup>1</sup>H NMR** (500 MHz, CDCl<sub>3</sub>) δ 7.34 – 7.31 (m, 1H), 7.21 – 7.19 (m, 1H), 7.12 – 7.09 (m, 1H), 6.88 (d, *J* = 7.8 Hz, 1H), 5.39 (dd, *J* = 9.2, 4.1 Hz, 1H), 3.21 (s, 3H), 3.04 (dd, *J* = 14.8, 9.2 Hz, 1H), 2.71 (dd, *J* = 14.9, 4.1 Hz, 1H), 1.40 (s, 3H). **<sup>13</sup>C NMR** (126 MHz, CDCl<sub>3</sub>) δ 179.1, 143.6, 131.2, 128.8, 122.8, 108.8, 69.8, 50.3, 47.3, 26.6, 25.6.

These data are in agreement with those reported previously in the literature<sup>9</sup>.

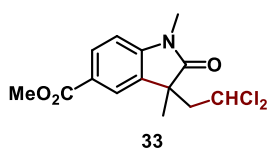

**methyl 3-(2,2-dichloroethyl)-1,3-dimethyl-2-oxindoline-5-carboxylate** **(33)**

Following the general procedure A, the title product was obtained after purification

by column chromatography (PE/EA = 5:1) as a white solid (40.3 mg, 0.128 mmol, 64%). **<sup>1</sup>H NMR** (400 MHz, CDCl<sub>3</sub>) δ 8.08 (dd, *J* = 8.2, 1.7 Hz, 1H), 7.89 (d, *J* = 1.7 Hz, 1H), 6.92 (d, *J* = 8.2 Hz, 1H), 5.37 (dd, *J* = 9.4, 4.2 Hz, 1H), 3.94 (s, 3H), 3.25 (s, 3H), 3.07 (dd, *J* = 14.8, 9.4 Hz, 1H), 2.77 (dd, *J* = 14.8, 4.2 Hz, 1H), 1.42 (s, 3H). **<sup>13</sup>C NMR** (101 MHz, CDCl<sub>3</sub>) δ 179.5, 166.8, 147.7, 131.5, 131.2, 124.7, 124.1, 108.3, 69.6, 52.3, 49.9, 47.1, 26.8, 25.6. **IR** (ATR): 2957, 1713, 1668, 1466, 1385, 1352, 1159, 737, 707 cm<sup>-1</sup>. **HRMS** (APCI): *m/z* [M+H]<sup>+</sup> calcd for C<sub>14</sub>H<sub>16</sub>NO<sub>3</sub>Cl<sub>2</sub><sup>+</sup>: 316.0502; found 316.0504. **Melting Point** (Experimental): 134 – 136 °C

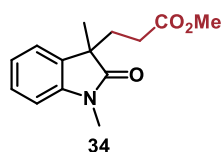

**methyl 3-(1,3-dimethyl-2-oxoindolin-3-yl)propanoate (34)** Following the general procedure C, the title product was obtained after purification by column chromatography (PE/EA = 5:1) as a colorless oil (32.1 mg, 0.130 mmol, 65%). **<sup>1</sup>H NMR** (400 MHz, CDCl<sub>3</sub>) δ 7.30 – 7.26 (m, 1H), 7.19 – 7.17 (m, 1H), 7.10 – 7.06 (m, 1H), 6.86 (d, *J* = 7.8 Hz, 1H), 3.54 (s, 3H), 3.22 (s, 3H), 2.28 – 2.19 (m, 1H), 2.17 – 2.03 (m, 2H), 1.93 – 1.81 (m, 1H), 1.39 (s, 3H). **<sup>13</sup>C NMR** (101 MHz, CDCl<sub>3</sub>) δ 180.0, 173.3, 143.3, 132.9, 128.2, 122.82, 122.77, 108.2, 51.7, 47.7, 33.1, 29.5, 26.3, 23.7. These data are in agreement with those reported previously in the literature<sup>10</sup>.

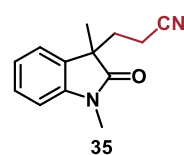

**3-(1,3-dimethyl-2-oxoindolin-3-yl)propanenitrile (35)** Following the general procedure C, the title product was obtained after purification by column chromatography (PE/EA = 5:1) as a colorless oil (33.0 mg, 0.154 mmol, 77%). **<sup>1</sup>H NMR** (500 MHz, CDCl<sub>3</sub>) δ 7.36 – 7.33 (m, 1H), 7.23 – 7.21 (m, 1H), 7.16 – 7.12 (m, 1H), 6.91 (d, *J* = 7.6 Hz, 1H), 3.25 (s, 3H), 2.39 – 2.33 (m, 1H), 2.15 – 1.98 (m, 3H), 1.42 (s, 3H). **<sup>13</sup>C NMR** (126 MHz, CDCl<sub>3</sub>) δ 178.9, 143.2, 131.7, 128.8, 123.1, 122.7, 118.9, 108.6, 47.4, 33.5, 26.4, 23.6, 12.9. These data are in agreement with those reported previously in the literature<sup>11</sup>.

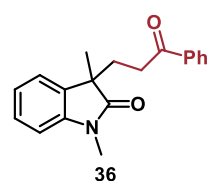

**1,3-dimethyl-3-(3-oxo-3-phenylpropyl)indolin-2-one (36)** Following the general procedure C, the title product was obtained after purification by column chromatography (PE/EA = 5:1) as a colorless oil (26.4 mg, 0.090 mmol, 45%). **<sup>1</sup>H NMR** (400 MHz, CDCl<sub>3</sub>) δ 7.80 – 7.77 (m, 2H), 7.53 – 7.48 (m, 1H), 7.47 – 7.31 (m, 2H), 7.30 – 7.20 (m, 2H), 7.10 – 7.06 (m, 1H), 6.87 (d, *J* = 7.7 Hz, 1H), 3.26 (s, 3H), 2.84 – 2.76 (m, 1H), 2.52 – 2.44 (m, 1H), 2.38 – 2.20 (m, 2H), 1.43 (s, 3H). **<sup>13</sup>C NMR** (101 MHz, CDCl<sub>3</sub>) δ 199.5, 180.3, 143.2, 136.7, 133.4, 133.1, 128.6, 128.2, 128.1, 122.9, 122.8, 108.2, 47.7, 33.6, 32.5, 26.3, 23.9. These data are in agreement with those reported previously in the literature<sup>12</sup>.

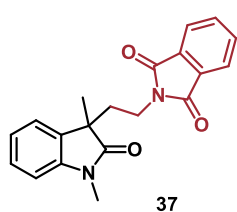

**2-(2-(1,3-dimethyl-2-oxoindolin-3-yl)ethyl)isoindoline-1,3-dione (37)** Following the general procedure C, the title product was obtained after purification by column chromatography (PE/EA = 20:1) as a colorless oil (31.4 mg, 0.094 mmol, 47%). **<sup>1</sup>H NMR** (400 MHz, CDCl<sub>3</sub>) δ 7.66 – 7.61 (m, 4H), 7.08 (d, *J* = 7.4 Hz, 1H), 6.96 – 6.92 (m, 1H), 6.78 – 6.65 (m, 2H), 3.59 (ddd, *J* = 14.5, 8.8, 5.9 Hz, 1H), 3.44 (dt, *J* = 14.5, 5.7 Hz, 1H), 3.20 (s, 3H), 2.46 (ddd, *J* = 14.8, 8.8, 6.2 Hz, 1H), 2.31 (dt, *J* = 14.8, 5.6 Hz, 1H), 1.36 (s, 3H). **<sup>13</sup>C NMR** (101 MHz, CDCl<sub>3</sub>) δ 179.6, 167.9, 143.1, 133.7, 132.9, 131.9, 127.6, 122.9, 122.4, 122.1, 108.4, 47.1, 34.64, 34.6, 26.3, 25.2. These data are in agreement with those reported previously in the literature<sup>12</sup>.

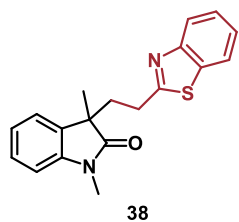

38

**3-(2-(benzo[d]thiazol-2-yl)ethyl)-1,3-dimethylindolin-2-one (38)** Following the general procedure C, the title product was obtained after purification by column chromatography (PE/EA = 100:1) as a colorless oil (38.6 mg, 0.120 mmol, 60%). **<sup>1</sup>H NMR** (500 MHz, CDCl<sub>3</sub>) δ 7.92 – 7.90 (m, 1H), 7.81 – 7.79 (m, 1H), 7.44 – 7.40 (m, 1H), 7.35 – 7.27 (m, 2H), 7.26 – 7.24 (m, 1H), 7.09 – 7.05 (m, 1H), 6.88 (d, *J* = 7.8 Hz, 1H), 3.25 (s, 3H), 2.84 (ddd, *J* = 15.0, 12.2, 5.1 Hz, 1H), 2.72 (ddd, *J* = 15.0, 11.9, 4.8 Hz, 1H), 2.52 (ddd, *J* = 13.3, 11.9, 5.1 Hz, 1H), 2.37 (ddd, *J* = 13.3, 12.2, 4.8 Hz, 1H), 1.46 (s, 3H). **<sup>13</sup>C NMR** (126 MHz, CDCl<sub>3</sub>) δ 180.0, 170.9, 153.2, 143.4, 135.2, 133.1, 128.3, 126.0, 124.8, 123.0, 122.9, 122.6, 121.6, 108.3, 48.2, 37.4, 29.7, 26.4, 23.8. **IR** (ATR): 2925, 1703, 1612, 1492, 1377, 1346, 1123, 1095, 755 cm<sup>-1</sup>. **HRMS** (APCI): *m/z* [M+H]<sup>+</sup> calcd for C<sub>19</sub>H<sub>19</sub>ON<sub>2</sub>S<sup>+</sup>: 323.1213; found 323.1215.

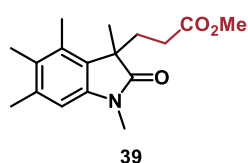

39

**methyl 3-(1,3,4,5,6-pentamethyl-2-oxoindolin-3-yl)propanoate (39)** Following the general procedure C, the title product was obtained after purification by column chromatography (PE/EA = 10:1) as a colorless oil (46.8 mg, 0.162 mmol, 81%). **<sup>1</sup>H NMR** (500 MHz, CDCl<sub>3</sub>) δ 6.55 (s, 1H), 3.51 (s, 3H), 3.18 (s, 3H), 2.39 – 2.30 (m, 1H), 2.32 (s, 3H), 2.29 – 2.24 (m, 1H), 2.28 (s, 3H), 2.14 (s, 3H), 1.97 – 1.91 (m, 1H), 1.81 – 1.74 (m, 1H), 1.46 (s, 3H). **<sup>13</sup>C NMR** (126 MHz, CDCl<sub>3</sub>) δ 180.1, 173.3, 141.1, 136.1, 133.3, 129.8, 127.1, 107.8, 51.6, 48.9, 31.7, 29.9, 26.2, 22.6, 21.4, 15.7, 14.9. **IR** (ATR): 2931, 1703, 1614, 1455, 1381, 1339, 1171, 1062, 838 cm<sup>-1</sup>. **HRMS** (APCI): *m/z* [M+H]<sup>+</sup> calcd for C<sub>17</sub>H<sub>24</sub>O<sub>3</sub>N<sup>+</sup>: 290.1751; found 290.1753.

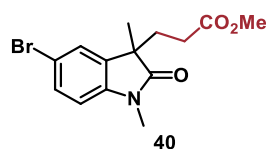

40

**methyl 3-(5-bromo-1,3-dimethyl-2-oxoindolin-3-yl)propanoate (40)** Following the general procedure C, the title product was obtained after purification by column chromatography (PE/EA = 5:1) as a colorless oil (33.1 mg, 0.102 mmol, 51%). **<sup>1</sup>H NMR** (500 MHz, CDCl<sub>3</sub>) δ 7.19 – 7.13 (m, 2H), 6.80 (dd, *J* = 7.2, 1.5 Hz, 1H), 3.56 (s, 3H), 3.21 (s, 3H), 2.67 (ddd, *J* = 13.8, 10.9, 5.8 Hz, 1H), 2.23 (ddd, *J* = 13.8, 10.9, 5.5 Hz, 1H), 1.96 – 1.83 (m, 2H), 1.53 (s, 3H). **<sup>13</sup>C NMR** (126 MHz, CDCl<sub>3</sub>) δ 179.3, 172.9, 145.4, 130.4, 129.7, 127.0, 119.1, 107.3, 51.7, 50.1, 30.0, 29.8, 26.5, 21.2. **IR** (ATR): 2931, 1710, 1602, 1578, 1451, 1297, 1172, 1120, 776, 561, 499 cm<sup>-1</sup>. **HRMS** (APCI): *m/z* [M+H]<sup>+</sup> calcd for C<sub>14</sub>H<sub>17</sub>O<sub>3</sub>NBr<sup>+</sup>: 326.0386; found 326.0385.

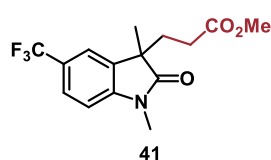

41

**methyl 3-(1,3-dimethyl-2-oxo-5-(trifluoromethyl)indolin-3-yl)propanoate (41)** Following the general procedure C, the title product was obtained after purification by column chromatography (PE/EA = 5:1) as white solid (32.8 mg, 0.104 mmol, 52%). **<sup>1</sup>H NMR** (500 MHz, CDCl<sub>3</sub>) δ 7.59 – 7.57 (m, 1H), 7.41 (d, *J* = 1.3 Hz, 1H), 6.93 (d, *J* = 8.2 Hz, 1H), 3.55 (s, 3H), 3.26 (s, 3H), 2.28 (ddd, *J* = 13.1, 10.4, 5.2 Hz, 1H), 2.19 – 2.06 (m, 2H), 1.90 (ddd, *J* = 15.9, 10.4, 5.2 Hz, 1H), 1.42 (s, 3H). **<sup>13</sup>C NMR** (126 MHz, CDCl<sub>3</sub>) δ 179.9, 172.9, 146.4, 133.6, 126.1 (q, *J* = 4.0 Hz), 125.0 (q, *J* = 32.3 Hz), 124.5 (q, *J* = 272.2 Hz), 119.9 (q, *J* = 3.2 Hz), 108.0, 51.8, 47.7, 32.9, 29.5, 26.5, 23.6. **<sup>19</sup>F**

**NMR** (471 MHz, CDCl<sub>3</sub>)  $\delta$  -61.2. **IR** (ATR): 2957, 1721, 1623, 1505, 1460, 1328, 1115, 823, 537 cm<sup>-1</sup>. **HRMS** (APCI):  $m/z$  [M+H]<sup>+</sup> calcd for C<sub>15</sub>H<sub>17</sub>O<sub>3</sub>NF<sub>3</sub><sup>+</sup>: 316.1155; found 316.1157.

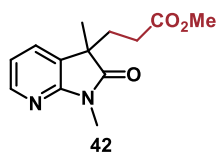

**methyl 3-(1,3-dimethyl-2-oxo-2,3-dihydro-1H-pyrrolo[2,3-b]pyridin-3-yl)propanoate (42)** Following the general procedure C, the title product was obtained after purification by column chromatography (PE/EA = 5:1) as a colorless oil (28.8 mg, 0.116 mmol, 58%). **<sup>1</sup>H NMR** (400 MHz, CDCl<sub>3</sub>)  $\delta$  8.20 (dd,  $J$  = 5.2, 1.6 Hz, 1H), 7.43 (dd,  $J$  = 7.2, 1.6 Hz, 1H), 6.98 (dd,  $J$  = 7.2, 5.2 Hz, 1H), 3.55 (s, 3H), 3.31 (s, 3H), 2.30 – 2.22 (m, 1H), 2.19 – 2.09 (m, 2H), 1.98 – 1.89 (m, 1H), 1.41 (s, 3H). **<sup>13</sup>C NMR** (101 MHz, CDCl<sub>3</sub>)  $\delta$  179.6, 173.1, 156.9, 147.2, 130.4, 127.3, 118.3, 51.8, 47.4, 32.5, 29.4, 25.4, 23.2. **IR** (ATR): 2925, 1714, 1592, 1467, 1345, 1133, 1020, 780 cm<sup>-1</sup>. **HRMS** (ESI):  $m/z$  [M+Na]<sup>+</sup> calcd for C<sub>13</sub>H<sub>16</sub>N<sub>2</sub>O<sub>3</sub>Na<sup>+</sup>: 271.1053; found 271.1050.

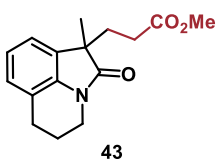

**methyl 3-(1-methyl-2-oxo-1,2,5,6-tetrahydro-4H-pyrrolo[3,2,1-ij]quinolin-1-yl)propanoate (43)** Following the general procedure C, the title product was obtained after purification by column chromatography (PE/EA = 5:1) as white solid (41.5 mg, 0.152 mmol, 76%). **<sup>1</sup>H NMR** (400 MHz, CDCl<sub>3</sub>)  $\delta$  7.04 – 6.93 (m, 3H), 3.77 – 3.67 (m, 2H), 3.55 (s, 3H), 2.79 (t,  $J$  = 6.1 Hz, 2H), 2.26 – 1.90 (m, 6H), 1.39 (s, 3H). **<sup>13</sup>C NMR** (101 MHz, CDCl<sub>3</sub>)  $\delta$  178.8, 173.4, 139.1, 131.4, 126.9, 122.2, 120.6, 120.3, 51.7, 49.0, 38.8, 32.9, 29.6, 24.7, 23.4, 21.3. **IR** (ATR): 2924, 1734, 1694, 1599, 1483, 1385, 1166, 1060, 787 cm<sup>-1</sup>. **HRMS** (ESI):  $m/z$  [M+Na]<sup>+</sup> calcd for C<sub>16</sub>H<sub>19</sub>NO<sub>3</sub>Na<sup>+</sup>: 296.1257; found 296.1255. **Melting Point**: 184 – 186 °C.

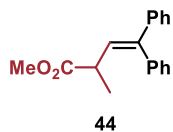

**methyl 2-methyl-4,4-diphenylbut-3-enoate (44)** Following the general procedure C, the title product was obtained after purification by column chromatography (PE/EA = 10:1) as a colorless oil (38.3 mg, 0.146 mmol, 73%). **<sup>1</sup>H NMR** (400 MHz, CDCl<sub>3</sub>)  $\delta$  7.41 – 7.32 (m, 3H), 7.28 – 7.25 (m, 2H), 7.24 – 7.19 (m, 5H), 6.12 (d,  $J$  = 10.3 Hz, 1H), 3.68 (s, 3H), 3.33 – 3.27 (m, 1H), 1.27 (d,  $J$  = 7.0 Hz, 3H). **<sup>13</sup>C NMR** (101 MHz, CDCl<sub>3</sub>)  $\delta$  175.5, 143.2, 141.9, 139.4, 129.9, 128.5, 128.3, 127.8, 127.54, 127.49, 52.1, 40.4, 18.7. These data are in agreement with those reported previously in the literature<sup>13</sup>.

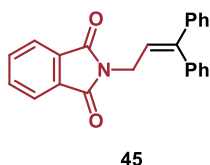

**4,4-diphenylbut-3-enitrile (45)** Following the general procedure C, the title product was obtained after purification by column chromatography (PE/EA = 10:1) as a colorless oil (38.3 mg, 0.146 mmol, 68%). **<sup>1</sup>H NMR** (400 MHz, CDCl<sub>3</sub>)  $\delta$  7.83 – 7.81 (m, 2H), 7.70 – 7.68 (m, 2H), 7.47 – 7.39 (m, 2H), 7.37 – 7.32 (m, 3H), 7.28 – 7.19 (m, 5H), 6.07 (t,  $J$  = 6.6 Hz, 1H), 4.39 (d,  $J$  = 6.6 Hz, 1H). **<sup>13</sup>C NMR** (101 MHz, CDCl<sub>3</sub>)  $\delta$  168.1, 144.8, 141.5, 138.8, 134.0, 132.2, 129.9, 128.6, 128.5, 128.2, 127.7, 127.7, 127.5, 123.3, 122.4, 37.7. These data are in agreement with those reported previously in the literature<sup>14</sup>.

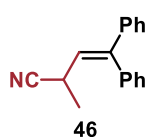

**2-methyl-4,4-diphenylbut-3-enitrile (46)** Following the general procedure C, the title product was obtained after purification by column chromatography (PE/EA = 10:1) as a colorless oil (27.5 mg, 0.118 mmol, 59%). **<sup>1</sup>H NMR** (500 MHz, CDCl<sub>3</sub>) δ 7.44 – 7.36 (m, 3H), 7.32 – 7.29 (m, 2H), 7.25 – 7.18 (m, 5H), 5.97 (d, *J* = 9.9 Hz, 1H), 3.39 (dq, *J* = 9.9, 7.0 Hz, 1H), 1.42 (d, *J* = 7.0 Hz, 3H). **<sup>13</sup>C NMR** (101 MHz, CDCl<sub>3</sub>) δ 145.7, 140.7, 138.3, 129.4, 128.9, 128.5, 128.3, 128.2, 127.6, 123.5, 121.8, 25.9, 19.6. These data are in agreement with those reported previously in the literature<sup>15</sup>.

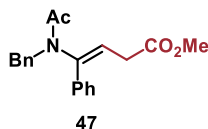

**methyl (E)-4-(N-benzylacetamido)-4-phenylbut-3-enoate (47)** Following the general procedure C, the title product was obtained after purification by column chromatography (PE/EA = 10:1) as a colorless oil (52.3 mg, 0.162 mmol, 81%, *E:Z* = 5/1). **<sup>1</sup>H NMR (400 MHz, CDCl<sub>3</sub>)** major *E*-isomer: δ 7.43 – 7.38 (m, 3H), 7.29 – 7.18 (m, 7H), 5.53 (t, *J* = 7.6 Hz, 1H), 4.49 (s, 2H), 3.63 (s, 3H), 3.21 (d, *J* = 7.6 Hz, 2H), 2.28 (s, 3H). **<sup>13</sup>C NMR (101 MHz, CDCl<sub>3</sub>)** major *E*-isomer: δ 171.3, 170.9, 141.6, 137.4, 134.2, 129.2, 129.0, 128.9, 128.8, 128.4, 127.3, 123.2, 52.1, 49.0, 33.9, 22.4. **IR (ATR):** major *E*-isomer: 2915, 1735, 1644, 1493, 1386, 1169, 980, 780 cm<sup>-1</sup>. **HRMS (ESI):** *m/z* [M+Na]<sup>+</sup> calcd for C<sub>20</sub>H<sub>21</sub>NO<sub>3</sub>Na<sup>+</sup>:346.1413; found 346.1406.

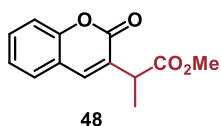

**methyl 2-(2-oxo-2H-chromen-3-yl)propanoate (48)** Following the general procedure C, the title product was obtained after purification by column chromatography (PE/EA = 10:1) as white solid (32.0 mg, 0.138 mmol, 69%). **<sup>1</sup>H NMR** (500 MHz, CDCl<sub>3</sub>) δ 7.65 (s, 1H), 7.53 – 7.49 (m, 2H), 7.34 – 7.29 (m, 2H), 3.92 (q, *J* = 7.3 Hz, 1H), 3.73 (s, 3H), 1.54 (d, *J* = 7.3 Hz, 3H). **<sup>13</sup>C NMR** (101 MHz, CDCl<sub>3</sub>) δ 173.9, 161.1, 153.3, 139.1, 131.5, 128.6, 127.9, 124.6, 119.2, 116.6, 52.5, 40.1, 16.4. **IR (ATR):** 2920, 1736, 1708, 1459, 1382, 1191, 1085, 788 cm<sup>-1</sup>. **HRMS (ESI):** *m/z* [M+Na]<sup>+</sup> calcd for C<sub>13</sub>H<sub>12</sub>O<sub>4</sub>Na<sup>+</sup>:255.0628; found 255.0626. **Melting Point:** 87 - 89 °C.

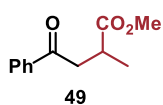

**methyl 2-methyl-4-oxo-4-phenylbutanoate (49)** Following the general procedure C, the title product was obtained after purification by column chromatography (PE/EA = 10:1) as a colorless oil (25.1 mg, 0.122 mmol, 61%). **<sup>1</sup>H NMR** (500 MHz, CDCl<sub>3</sub>) δ 8.00 – 7.96 (m, 2H), 7.59 – 7.55 (m, 1H), 7.48 – 7.45 (m, 2H), 3.71 (s, 3H), 3.49 (dd, *J* = 17.7, 7.9 Hz, 1H), 3.18 – 3.11 (m, 1H), 3.04 (dd, *J* = 17.7, 5.5 Hz, 1H), 1.29 (d, *J* = 7.2 Hz, 3H). **<sup>13</sup>C NMR** (126 MHz, CDCl<sub>3</sub>) δ 198.2, 176.6, 136.7, 133.4, 128.7, 128.2, 52.1, 42.1, 35.0, 17.4. These data are in agreement with those reported previously in the literature<sup>16</sup>.

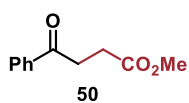

**methyl 4-oxo-4-phenylbutanoate (50)** Following the general procedure C, the title product was obtained after purification by column chromatography (PE/EA = 10:1) as a colorless oil (28.0 mg, 0.146 mmol, 73%). **<sup>1</sup>H NMR** (500 MHz, CDCl<sub>3</sub>) δ 8.00 – 7.99 (m, 2H), 7.59 – 7.56 (m, 1H), 7.49 – 7.46 (m, 2H), 3.71 (s, 3H), 3.33 (t, *J* = 6.6 Hz, 2H), 2.78 (t, *J* = 6.6 Hz, 2H). **<sup>13</sup>C NMR** (126 MHz, CDCl<sub>3</sub>) δ 198.2, 173.5, 136.6, 133.4, 128.8, 128.2, 52.0, 33.5, 28.1. These data are in agreement with those reported previously in the literature<sup>17</sup>.



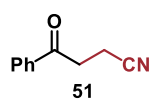

**4-oxo-4-phenylbutanenitrile (51)** Following the general procedure C, the title product was obtained after purification by column chromatography (PE/EA = 10:1) as a colorless oil (21.0 mg, 0.132 mmol, 66%).  $^1\text{H NMR}$  (400 MHz,  $\text{CDCl}_3$ )  $\delta$  7.98 – 7.95 (m, 2H), 7.65 – 7.60 (m, 1H), 7.52 – 7.48 (m, 2H), 3.41 – 3.38 (m, 2H), 2.80 – 2.77 (m, 2H).  $^{13}\text{C NMR}$  (101 MHz,  $\text{CDCl}_3$ )  $\delta$  195.5, 135.7, 134.1, 129.0, 128.2, 119.4, 34.4, 11.9. These data are in agreement with those reported previously in the literature<sup>18</sup>.

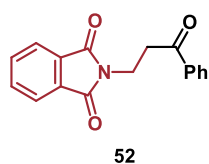

**2-(3-oxo-3-phenylpropyl)isoindoline-1,3-dione (52)** Following the general procedure C, the title product was obtained after purification by column chromatography (PE/EA = 10:1) as a colorless oil (28.5 mg, 0.102 mmol, 51%).  $^1\text{H NMR}$  (400 MHz,  $\text{CDCl}_3$ )  $\delta$  7.96 – 7.96 (m, 2H), 7.87 – 7.84 (m, 2H), 7.74 – 7.71 (m, 2H), 7.59 – 7.54 (m, 1H), 7.48 – 7.43 (m, 2H), 4.17 – 4.13 (m, 2H), 3.46 – 3.42 (m, 2H).  $^{13}\text{C NMR}$  (101 MHz,  $\text{CDCl}_3$ )  $\delta$  197.5, 168.3, 136.4, 134.1, 133.5, 132.2, 128.8, 128.1, 123.4, 36.9, 33.6. These data are in agreement with those reported previously in the literature<sup>18</sup>.

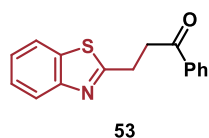

**3-(benzo[d]thiazol-2-yl)-1-phenylpropan-1-one (53)** Following the general procedure C, the title product was obtained after purification by column chromatography (PE/EA = 10:1) as a colorless oil (31.0 mg, 0.116 mmol, 58%).  $^1\text{H NMR}$  (400 MHz,  $\text{CDCl}_3$ )  $\delta$  8.04 – 7.79 (m, 4H), 7.60 – 7.33 (m, 5H), 3.68 – 3.64 (m, 2H), 3.56 – 3.59 (m, 2H).  $^{13}\text{C NMR}$  (101 MHz,  $\text{CDCl}_3$ )  $\delta$  198.0, 170.6, 153.3, 136.6, 135.3, 133.5, 128.8, 128.2, 126.0, 124.9, 122.6, 121.6, 37.6, 28.3. These data are in agreement with those reported previously in the literature<sup>18</sup>.

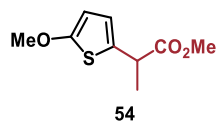

**methyl 2-(5-methoxythiophen-2-yl)propanoate (54)** Following the general procedure C, the title product was obtained after purification by column chromatography (PE/EA = 10:1) as a colorless oil (20.8 mg, 0.104 mmol, 52%).  $^1\text{H NMR}$  (500 MHz,  $\text{CDCl}_3$ )  $\delta$  6.53 (d,  $J$  = 3.8 Hz, 1H), 6.02 (d,  $J$  = 3.8 Hz, 1H), 3.85 (s, 3H), 3.82 (q,  $J$  = 7.2 Hz, 1H), 3.70 (s, 3H), 1.52 (d,  $J$  = 7.2 Hz, 3H).  $^{13}\text{C NMR}$  (126 MHz,  $\text{CDCl}_3$ )  $\delta$  174.3, 165.5, 128.9, 122.1, 103.1, 60.3, 52.4, 41.2, 19.1. **IR** (ATR): 2951, 1734, 1560, 1504, 1432, 1196, 1060, 767  $\text{cm}^{-1}$ . **HRMS** (ESI):  $m/z$   $[\text{M}+\text{Na}]^+$  calcd for  $\text{C}_9\text{H}_{12}\text{O}_3\text{SNa}^+$ :223.0399; found 223.0399.

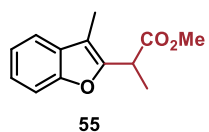

**methyl 2-(3-methylbenzofuran-2-yl)propanoate (55)** Following the general procedure C, the title product was obtained after purification by column chromatography (PE/EA = 10:1) as a colorless oil (28.3 mg, 0.130 mmol, 65%).  $^1\text{H NMR}$  (500 MHz,  $\text{CDCl}_3$ )  $\delta$  7.47 – 7.40 (m, 2H), 7.26 – 7.19 (m, 2H), 4.00 (q,  $J$  = 7.3 Hz, 1H), 3.69 (s, 3H), 2.21 (s, 3H), 1.59 (d,  $J$  = 7.3 Hz, 3H).  $^{13}\text{C NMR}$  (126 MHz,  $\text{CDCl}_3$ )  $\delta$  172.7, 154.0, 150.8, 130.1, 124.0, 122.3, 119.2, 111.3, 111.1, 52.5, 37.8, 15.5, 8.0. **IR** (ATR): 2949, 1737, 1454, 1189, 1066, 876  $\text{cm}^{-1}$ . **HRMS** (ESI):  $m/z$   $[\text{M}+\text{Na}]^+$  calcd for  $\text{C}_{13}\text{H}_{14}\text{O}_3\text{Na}^+$ :241.0835; found 241.0833.



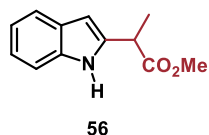

**methyl 2-(1H-indol-2-yl)propanoate (56)** Following the general procedure C, the title product was obtained after purification by column chromatography (PE/EA = 5:1) as pale yellow solid (17.5 mg, 0.086 mmol, 43%). **<sup>1</sup>H NMR** (500 MHz, CDCl<sub>3</sub>) δ 8.52 (bs, 1H), 7.56 – 7.54 (m, 1H), 7.35 – 7.33 (m, 1H), 7.17 – 7.06 (m, 2H), 6.37 – 6.36 (m, 1H), 3.96 (q, *J* = 7.2 Hz, 1H), 3.73 (s, 3H), 1.62 (d, *J* = 7.2 Hz, 3H). **<sup>13</sup>C NMR** (126 MHz, CDCl<sub>3</sub>) δ 174.2, 136.7, 136.3, 128.2, 122.0, 120.4, 120.0, 110.9, 100.3, 52.6, 39.2, 17.6. **IR** (ATR): 3355, 2920, 1712, 1455, 1330, 1197, 1068, 780 cm<sup>-1</sup>. **HRMS** (ESI): *m/z* [M+Na]<sup>+</sup> calcd for C<sub>12</sub>H<sub>13</sub>NO<sub>2</sub>Na<sup>+</sup>:226.0838; found 226.0836. **Melting Point:** 84 - 86 °C.

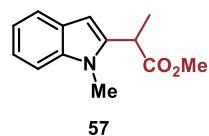

**methyl 2-(1-methyl-1H-indol-2-yl)propanoate (57)** Following the general procedure C, the title product was obtained after purification by column chromatography (PE/EA = 5:1) as a colorless oil (19.1 mg, 0.088 mmol, 44%). **<sup>1</sup>H NMR** (500 MHz, CDCl<sub>3</sub>) δ 7.57 – 7.56 (m, 1H), 7.30 – 7.28 (m, 1H), 7.22 – 7.18 (m, 1H), 7.12 – 7.07 (m, 1H), 6.43 (s, 1H), 3.96 (q, *J* = 7.2 Hz, 1H), 3.71 (s, 3H), 3.68 (s, 3H), 1.65 (d, *J* = 7.2 Hz, 3H). **<sup>13</sup>C NMR** (126 MHz, CDCl<sub>3</sub>) δ 173.7, 138.9, 137.6, 127.6, 121.5, 120.5, 119.7, 109.2, 99.6, 52.5, 37.9, 29.9, 17.0. **IR** (ATR): 2917, 1731, 1467, 1316, 1163, 1064, 775 cm<sup>-1</sup>. **HRMS** (ESI): *m/z* [M+Na]<sup>+</sup> calcd for C<sub>13</sub>H<sub>15</sub>NO<sub>2</sub>Na<sup>+</sup>:240.0995; found 240.0994.

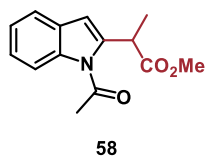

**methyl 2-(1-acetyl-1H-indol-2-yl)propanoate (58)** Following the general procedure C, the title product was obtained after purification by column chromatography (PE/EA = 5:1) as white solid (20.6 mg, 0.084 mmol, 42%). **<sup>1</sup>H NMR** (500 MHz, CDCl<sub>3</sub>) δ 7.64 – 7.55 (m, 2H), 7.32 – 7.23 (m, 2H), 6.63 (s, 1H), 4.39 (q, *J* = 7.3, 1H), 3.71 (s, 3H), 2.80 (s, 3H), 1.65 (d, *J* = 7.3 Hz, 3H). **<sup>13</sup>C NMR** (126 MHz, CDCl<sub>3</sub>) δ 174.4, 170.7, 141.2, 136.0, 130.0, 124.2, 123.2, 121.4, 114.3, 109.5, 52.2, 41.2, 27.7, 16.8. **IR** (ATR): 2952, 1731, 1697, 1428, 1369, 1210, 979 cm<sup>-1</sup>. **HRMS** (ESI): *m/z* [M+Na]<sup>+</sup> calcd for C<sub>14</sub>H<sub>15</sub>NO<sub>3</sub>Na<sup>+</sup>:268.0944; found 268.0942. **Melting Point:** 98 - 100 °C.

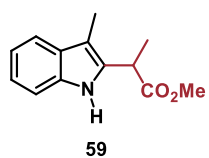

**methyl 2-(3-methyl-1H-indol-2-yl)propanoate (59)** Following the general procedure C, the title product was obtained after purification by column chromatography (PE/EA = 5:1) as white solid (29.5 mg, 0.136 mmol, 68%). **<sup>1</sup>H NMR** (500 MHz, CDCl<sub>3</sub>) δ 8.40 (bs, 1H), 7.52 – 7.50 (m, 1H), 7.32 – 7.30 (m, 1H), 7.17 – 7.07 (m, 2H), 4.06 (q, *J* = 7.3 Hz, 1H), 3.71 (s, 3H), 2.27 (s, 3H), 1.54 (d, *J* = 7.3 Hz, 3H). **<sup>13</sup>C NMR** (126 MHz, CDCl<sub>3</sub>) δ 175.0, 135.6, 132.1, 128.9, 121.9, 119.3, 118.6, 110.8, 107.9, 52.4, 37.0, 18.9, 8.5. These data are in agreement with those reported previously in the literature<sup>19</sup>.

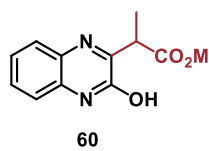

**methyl 2-(3-hydroxyquinoxalin-2-yl)propanoate (60)** Following the general procedure C, the title product was obtained after purification by column chromatography (PE/EA = 5:1) as whiter solid (40.4 mg, 0.174 mmol, 87%). **<sup>1</sup>H NMR** (500 MHz, CDCl<sub>3</sub>) δ 12.89 (bs, 1H), 7.86 (d, *J* = 8.7 Hz, 1H), 7.54 – 7.51 (m, 1H), 7.37 – 7.34 (m, 2H), 4.30 (q, *J* = 7.2 Hz, 1H), 3.73 (s, 3H), 1.66 (d, *J* = 7.2 Hz, 3H). **<sup>13</sup>C NMR** (126 MHz, CDCl<sub>3</sub>) δ 173.3, 158.6, 156.3, 132.8, 131.3,

130.5, 129.3, 124.4, 116.0, 52.4, 43.7, 14.5. **IR** (ATR): 2839, 1731, 1660, 1561, 1432, 1085, 763  $\text{cm}^{-1}$ . **HRMS** (ESI):  $m/z$   $[\text{M}+\text{Na}]^+$  calcd for  $\text{C}_{12}\text{H}_{12}\text{N}_2\text{O}_3\text{Na}^+$ :255.0740; found 255.0737. **Melting Point:** 184 - 186  $^{\circ}\text{C}$ .

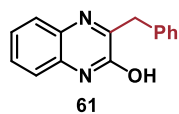

**3-benzylquinoxalin-2-ol (61)** Following the general procedure C, the title product was obtained after purification by column chromatography (PE/EA = 5:1) as whiter solid (29.7 mg, 0.126 mmol, 63%).  **$^1\text{H NMR}$**  (500 MHz,  $\text{CDCl}_3$ )  $\delta$  12.40 (bs, 1H), 7.85 - 7.83 (m, 1H), 7.50 - 7.46 (m, 3H), 7.34 - 7.25 (m, 4H), 7.22 - 7.19 (m, 1H), 4.30 (s, 2H).  **$^{13}\text{C NMR}$**  (126 MHz,  $\text{CDCl}_3$ )  $\delta$  159.9, 156.6, 137.1, 133.0, 131.3, 130.1, 129.7, 129.1, 128.5, 126.8, 124.3, 115.8, 40.1. These data are in agreement with those reported previously in the literature<sup>20</sup>.

## 14. NMR Spectrum

### <sup>1</sup>H NMR of Nitrenium Salt A1 (400 MHz, Methanol-*d*<sub>4</sub>)

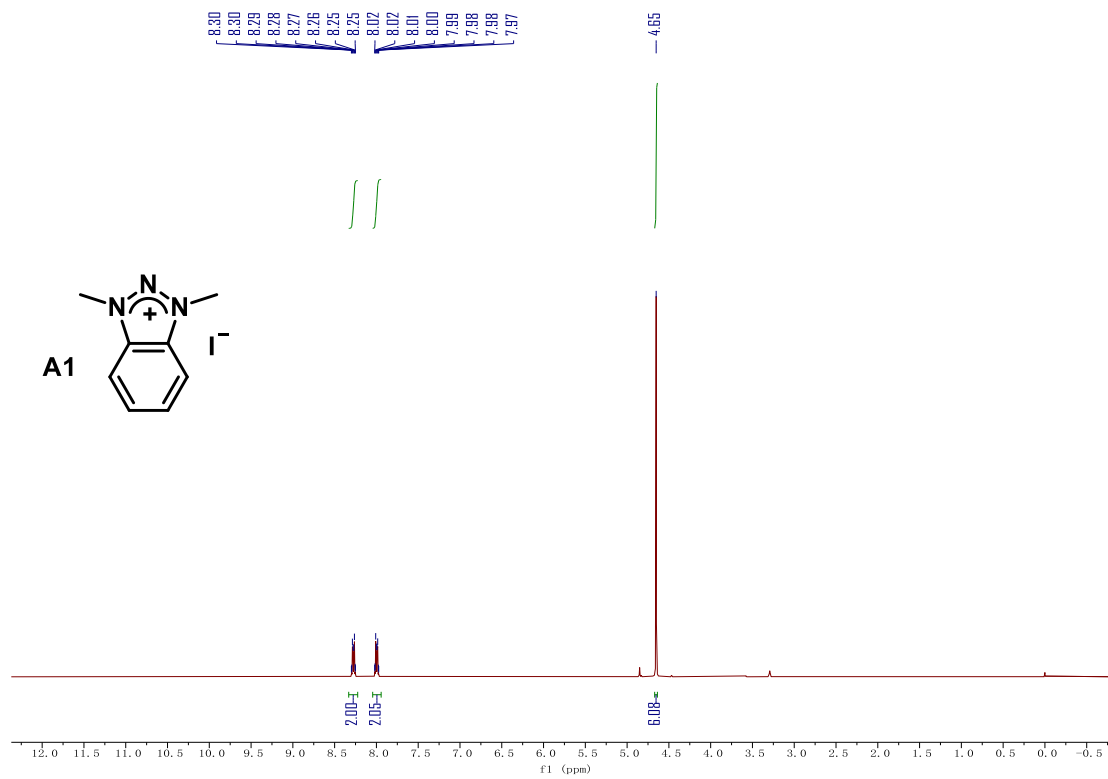

### <sup>13</sup>C NMR of Nitrenium Salt A1 (101 MHz, Methanol-*d*<sub>4</sub>)

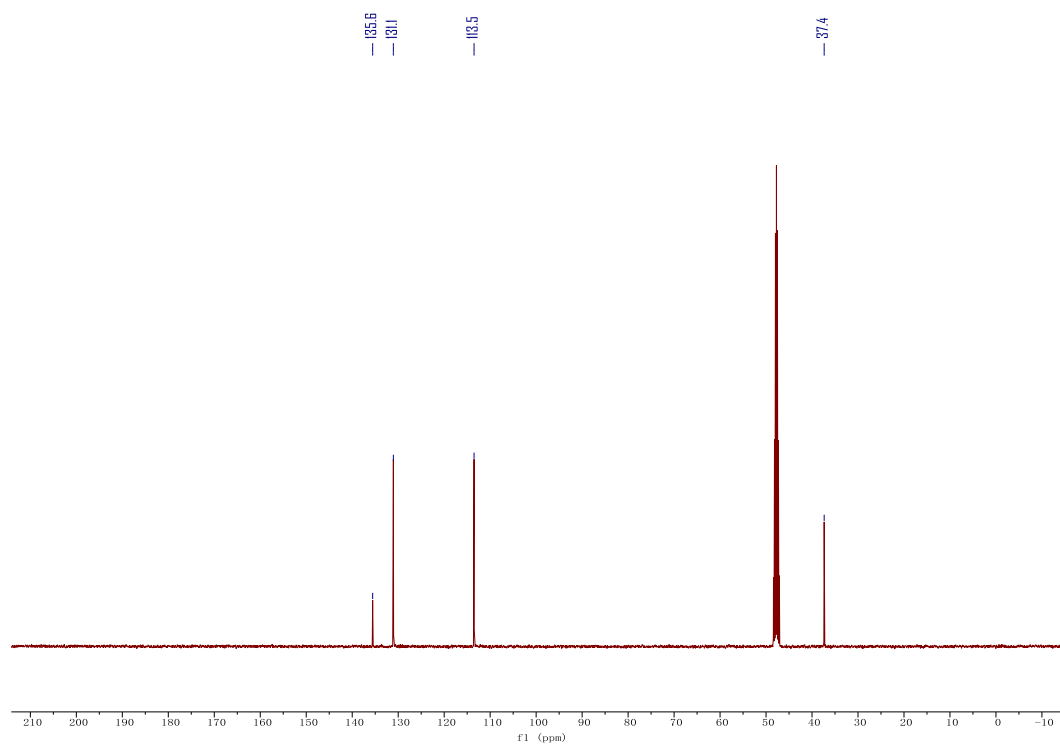

### <sup>1</sup>H NMR of Nitrenium Salt A2 (500 MHz, D<sub>2</sub>O)

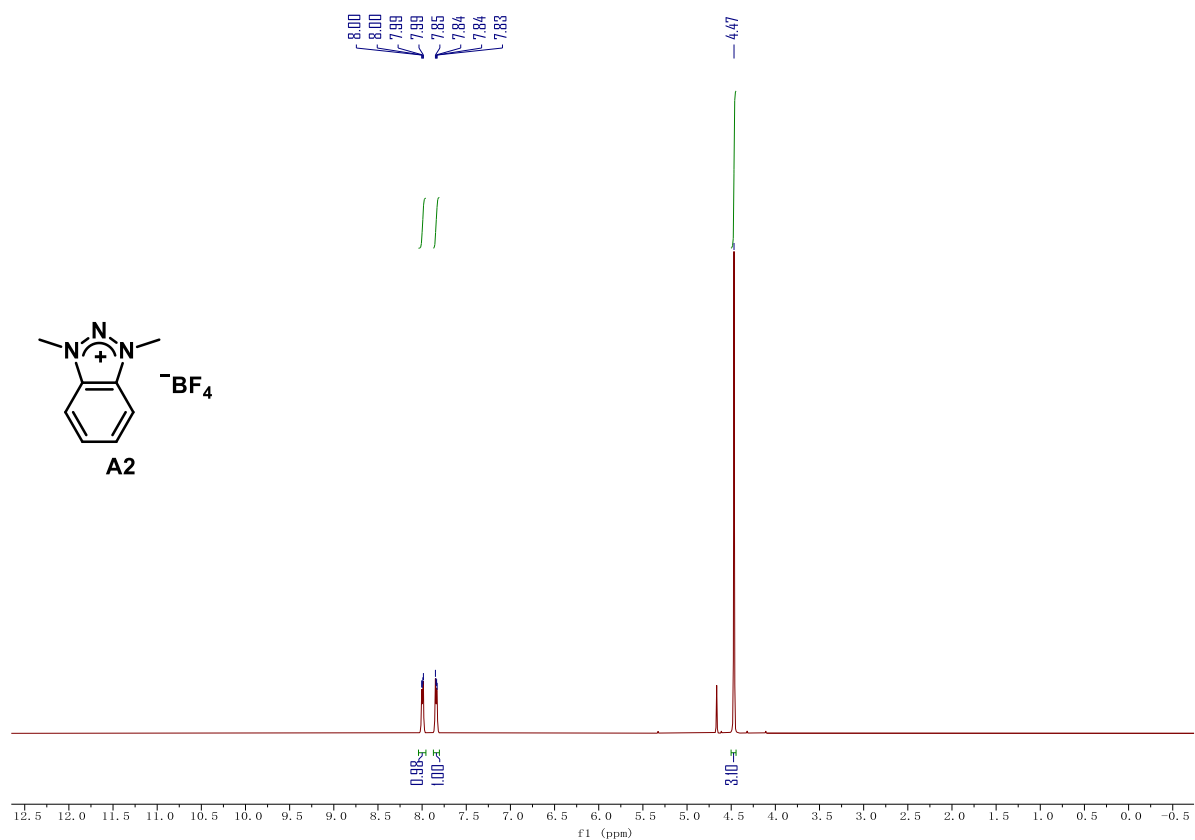

### <sup>13</sup>C NMR of Nitrenium Salt A2 (126 MHz, D<sub>2</sub>O)

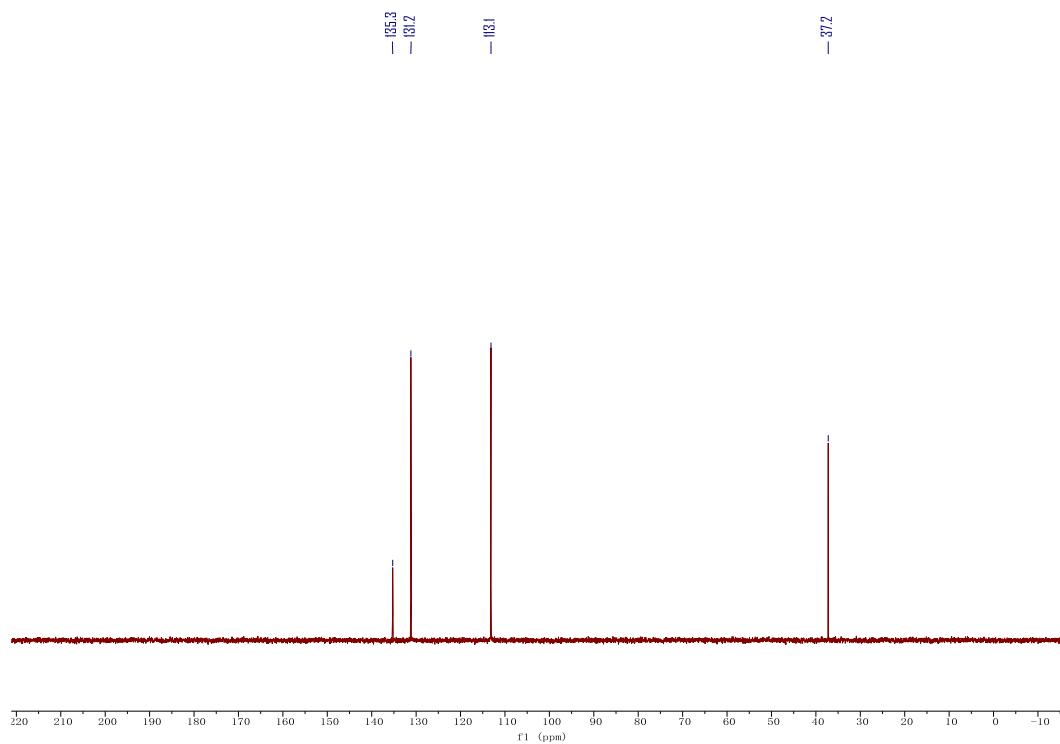

**$^{19}\text{F}$  NMR of Nitrenium Salt A2 (471 MHz,  $\text{D}_2\text{O}$ )**

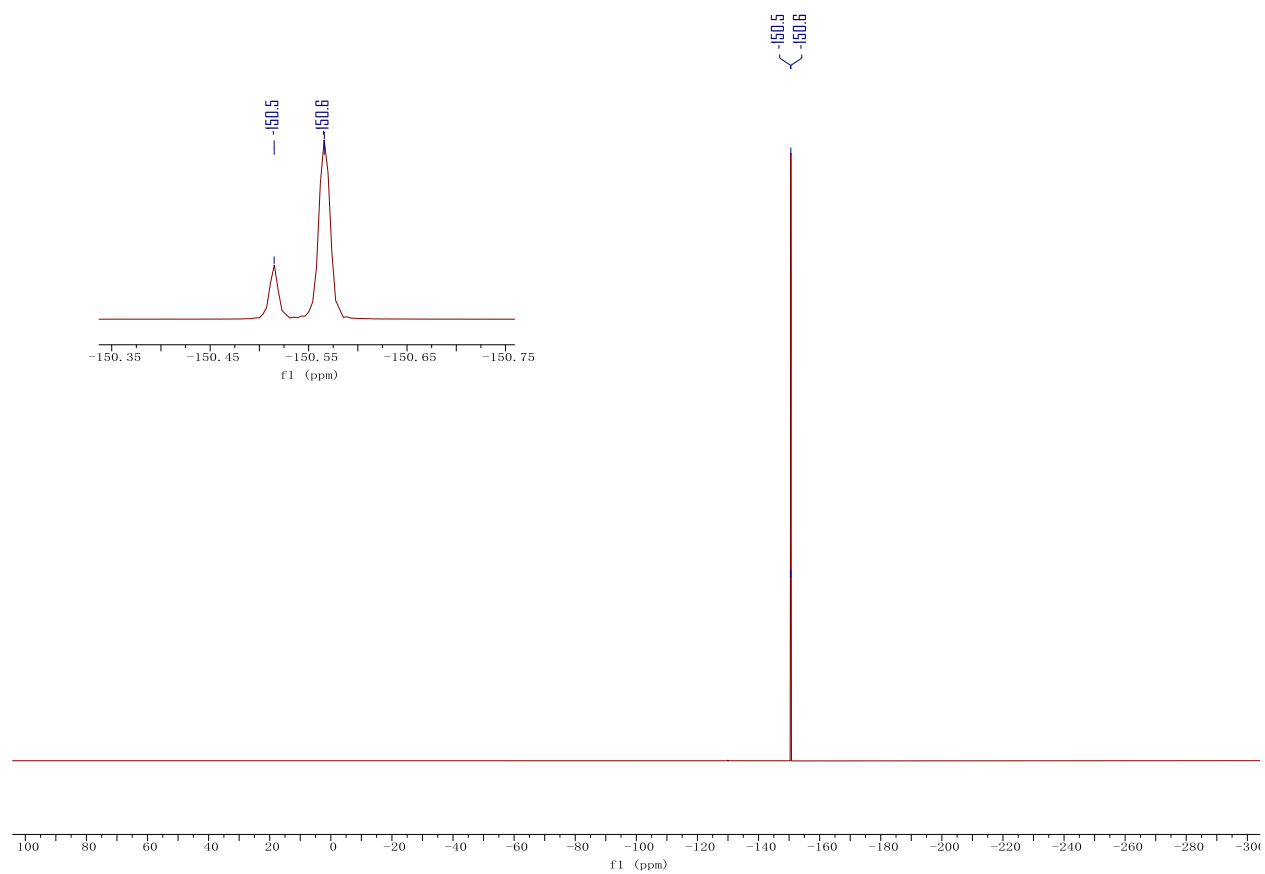

### <sup>1</sup>H NMR of Nitrenium Salt A3 (400 MHz, Methanol-*d*<sub>4</sub>)

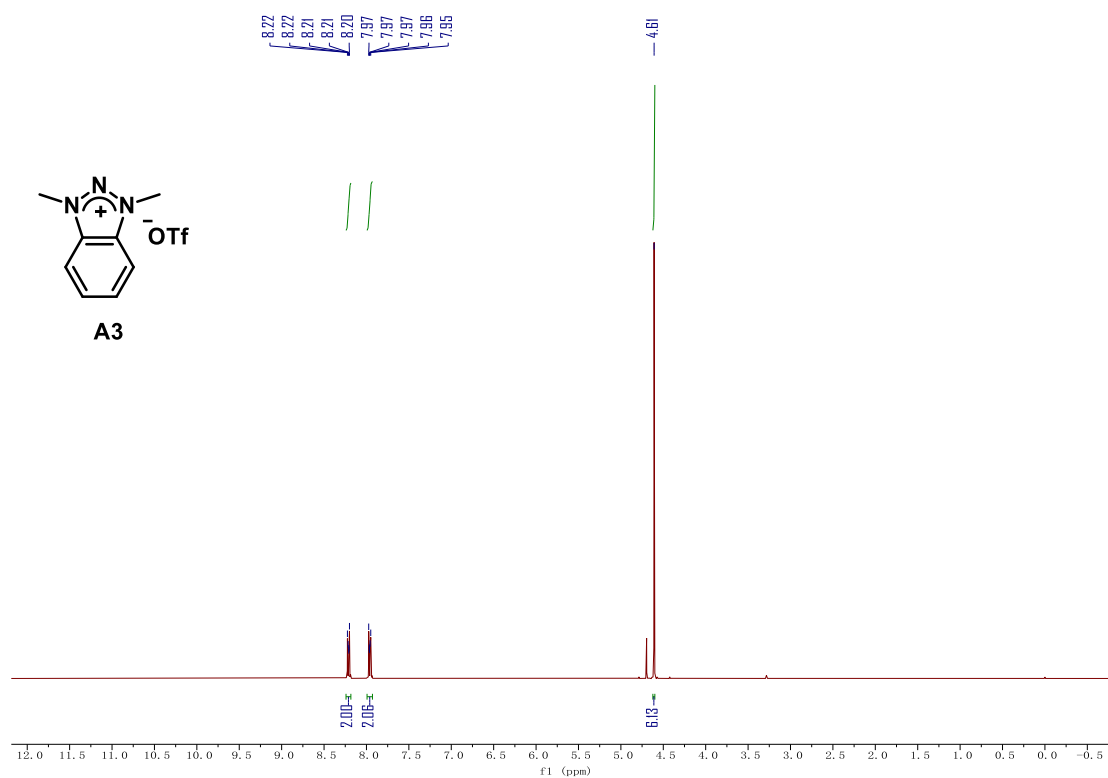

### <sup>13</sup>C NMR of Nitrenium Salt A3 (101 MHz, Methanol-*d*<sub>4</sub>)

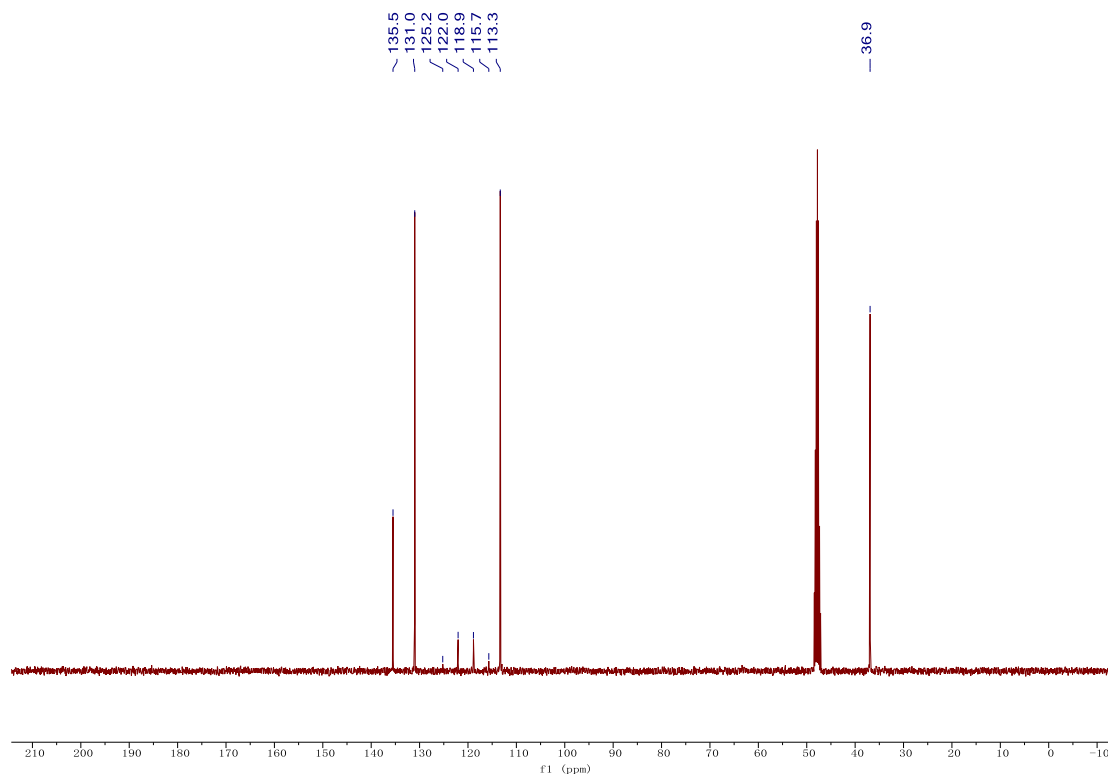

### <sup>19</sup>F NMR of Nitrenium Salt A3 (471 MHz, Methanol-*d*<sub>4</sub>)

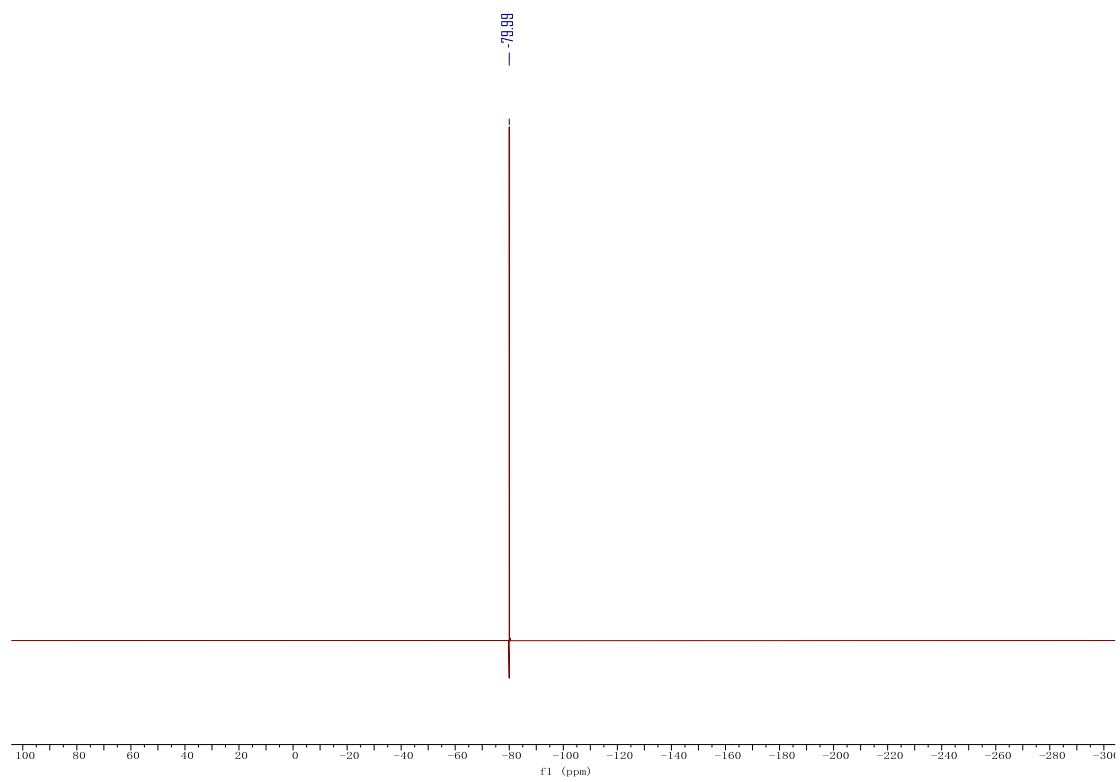

### <sup>1</sup>H NMR of Nitrenium Salt B (500 MHz, Methanol-*d*<sub>4</sub>)

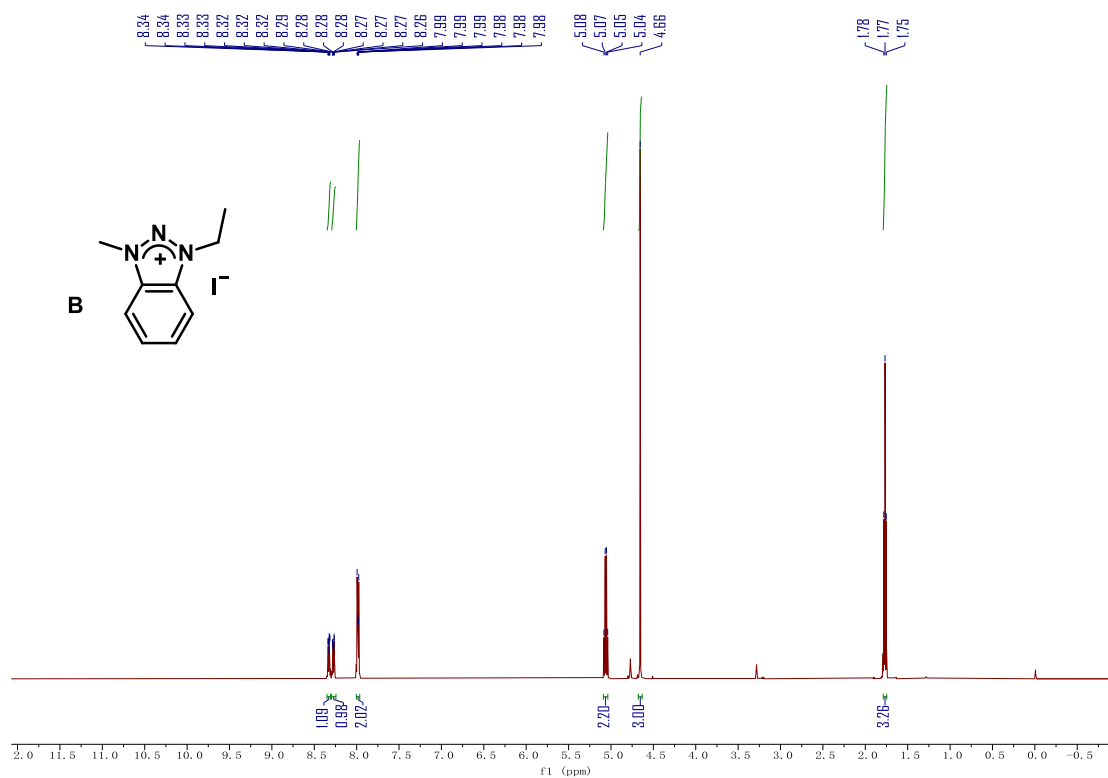

### <sup>13</sup>C NMR of Nitrenium Salt B (126 MHz, Methanol-*d*<sub>4</sub>)

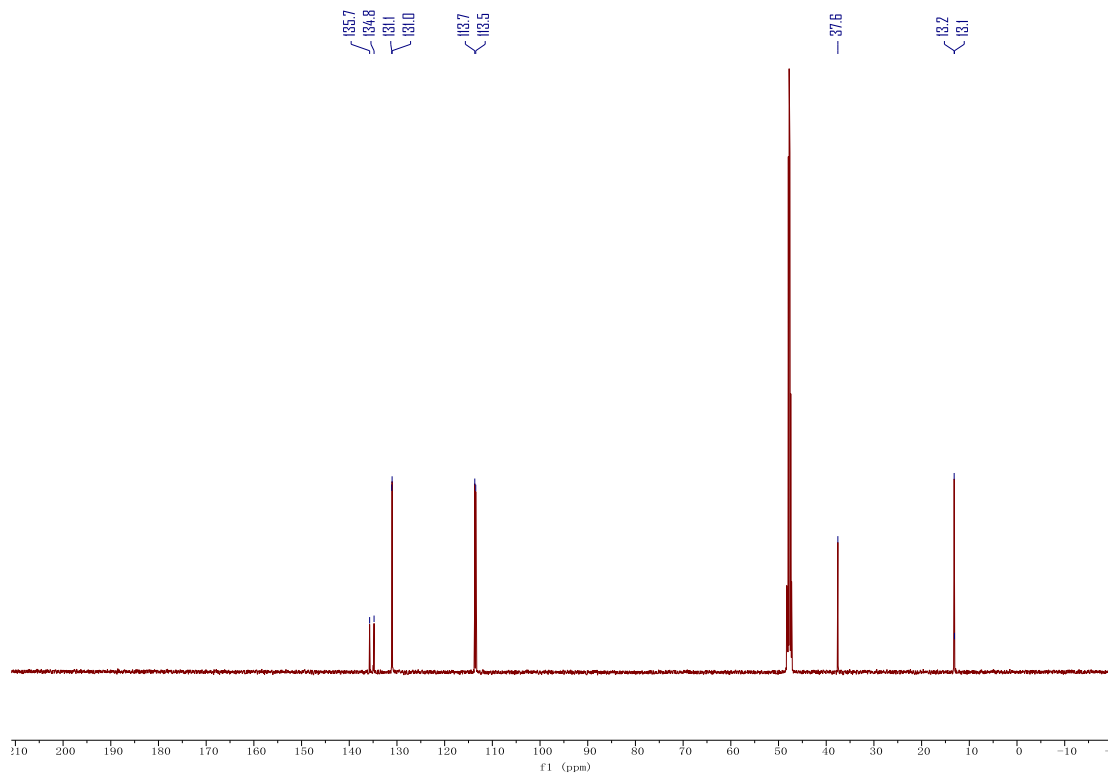



**<sup>1</sup>H NMR of Nitrenium Salt C (500 MHz, Methanol-*d*<sub>4</sub>)**

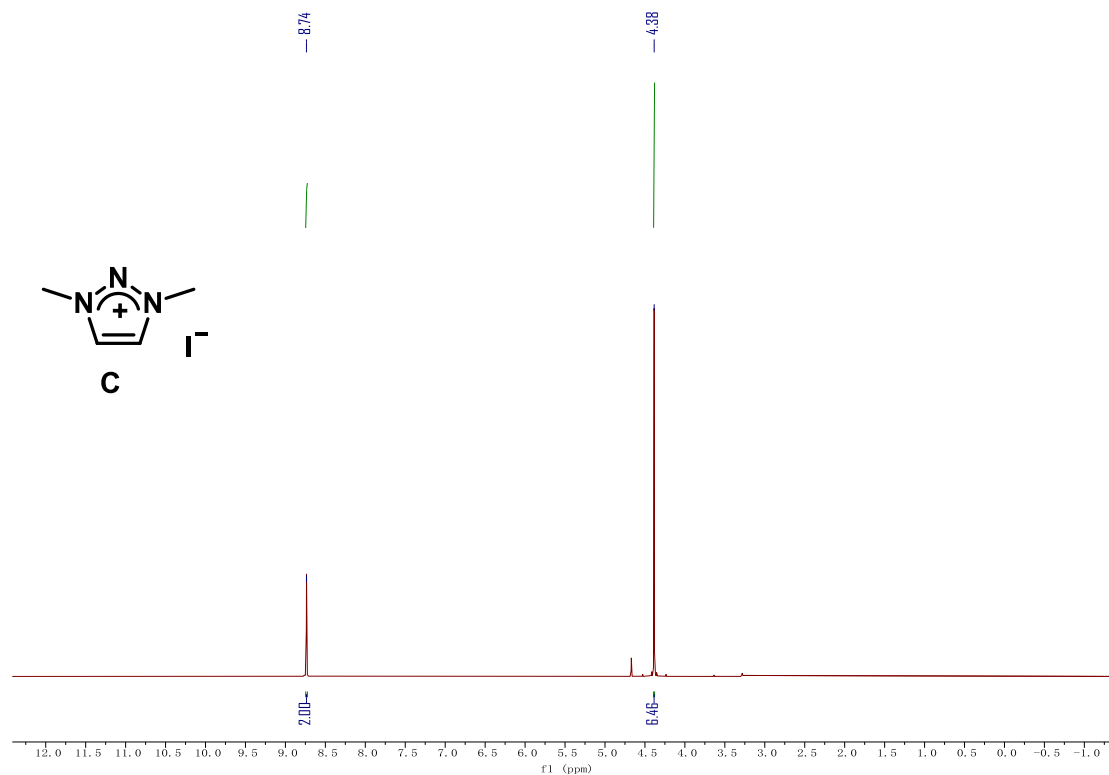

**<sup>13</sup>C NMR of Nitrenium Salt B1 (126 MHz, Methanol-*d*<sub>4</sub>)**

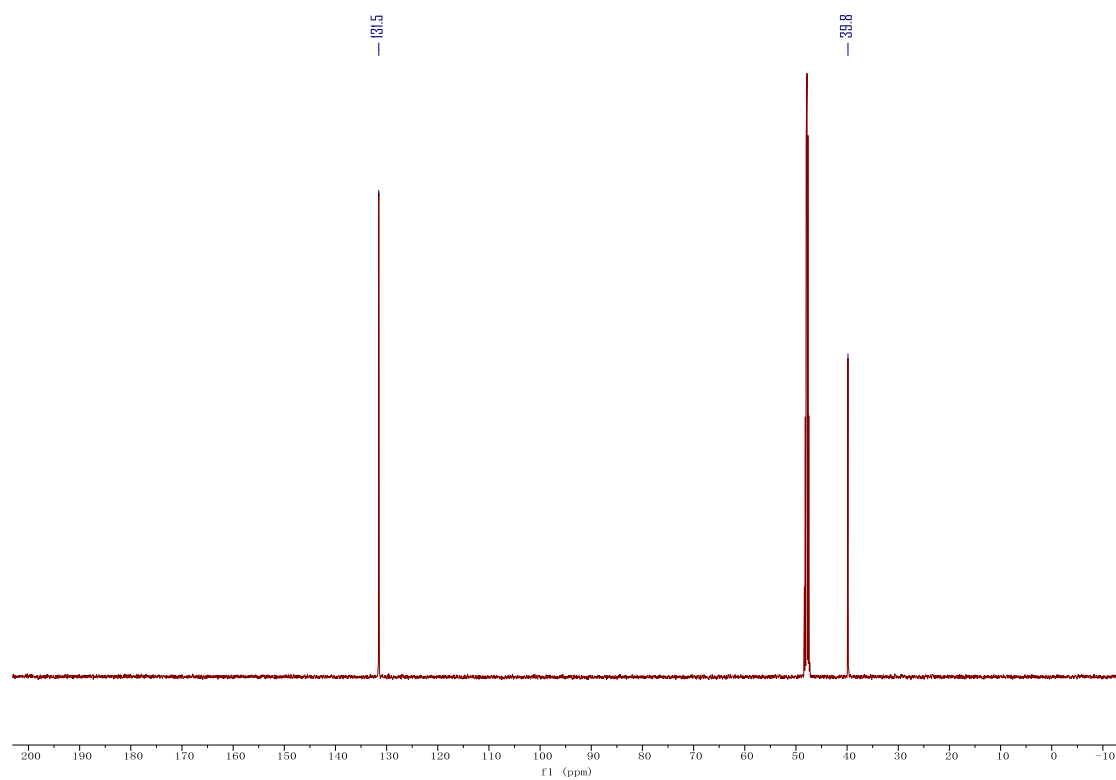

### $^1\text{H}$ NMR of Nitrenium Salt D (500 MHz, Methanol- $d_4$ )

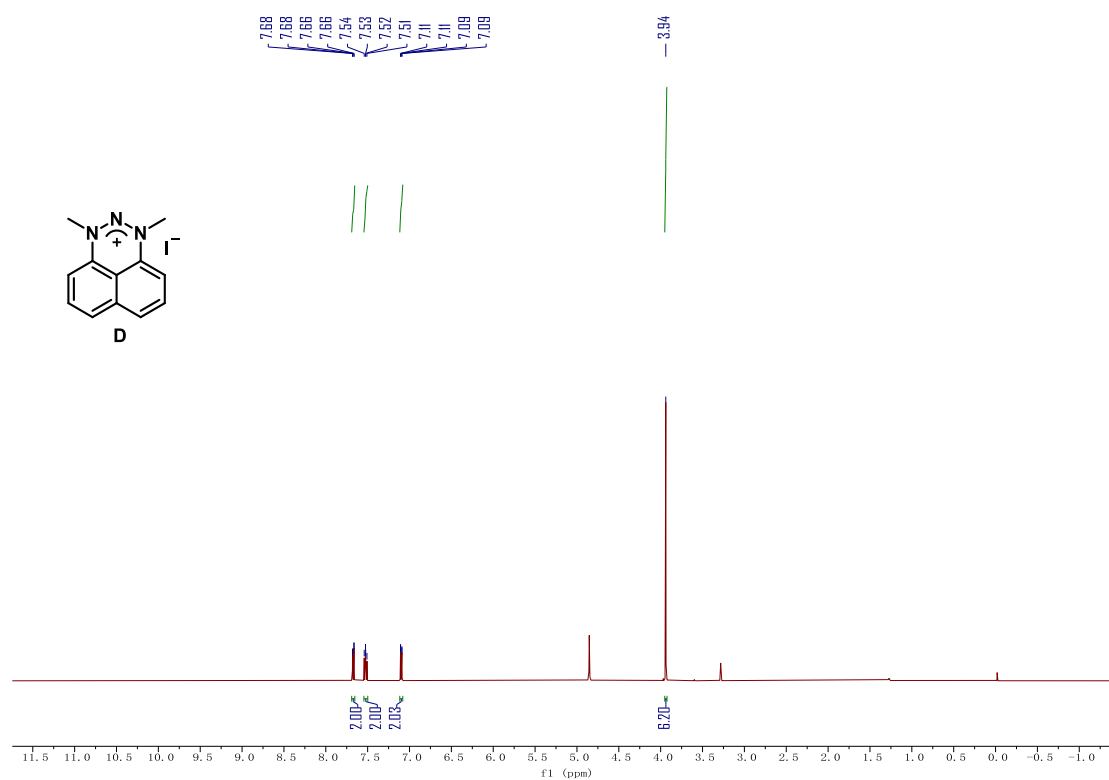

### $^{13}\text{C}$ NMR of Nitrenium Salt D (126 MHz, Methanol- $d_4$ )

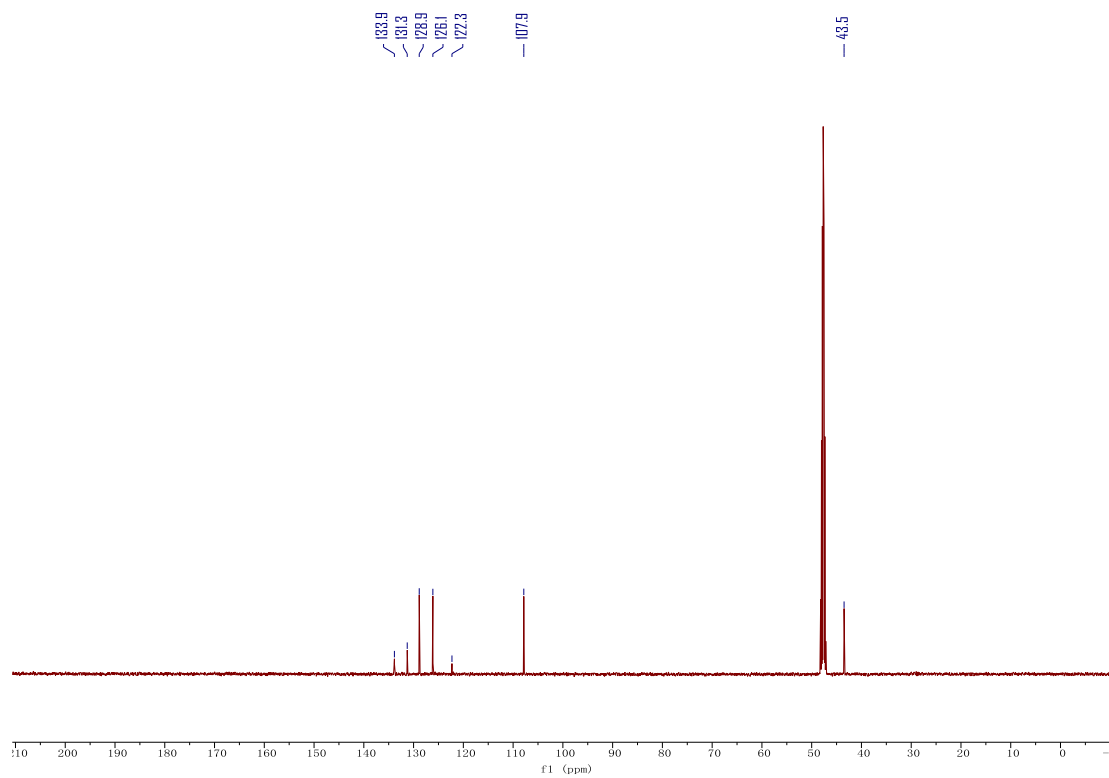

**<sup>1</sup>H NMR of 2 (500 MHz, CDCl<sub>3</sub>)**

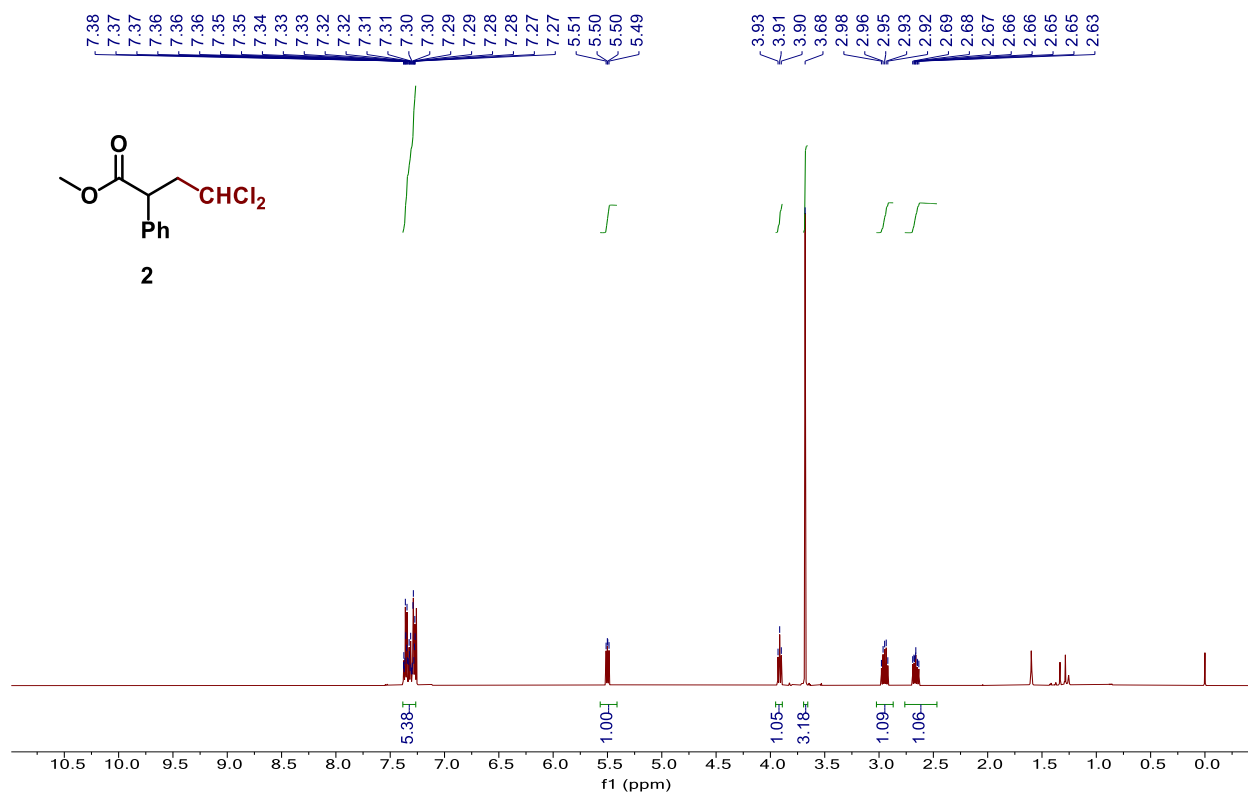

**<sup>13</sup>C NMR of 2 (126 MHz, CDCl<sub>3</sub>)**

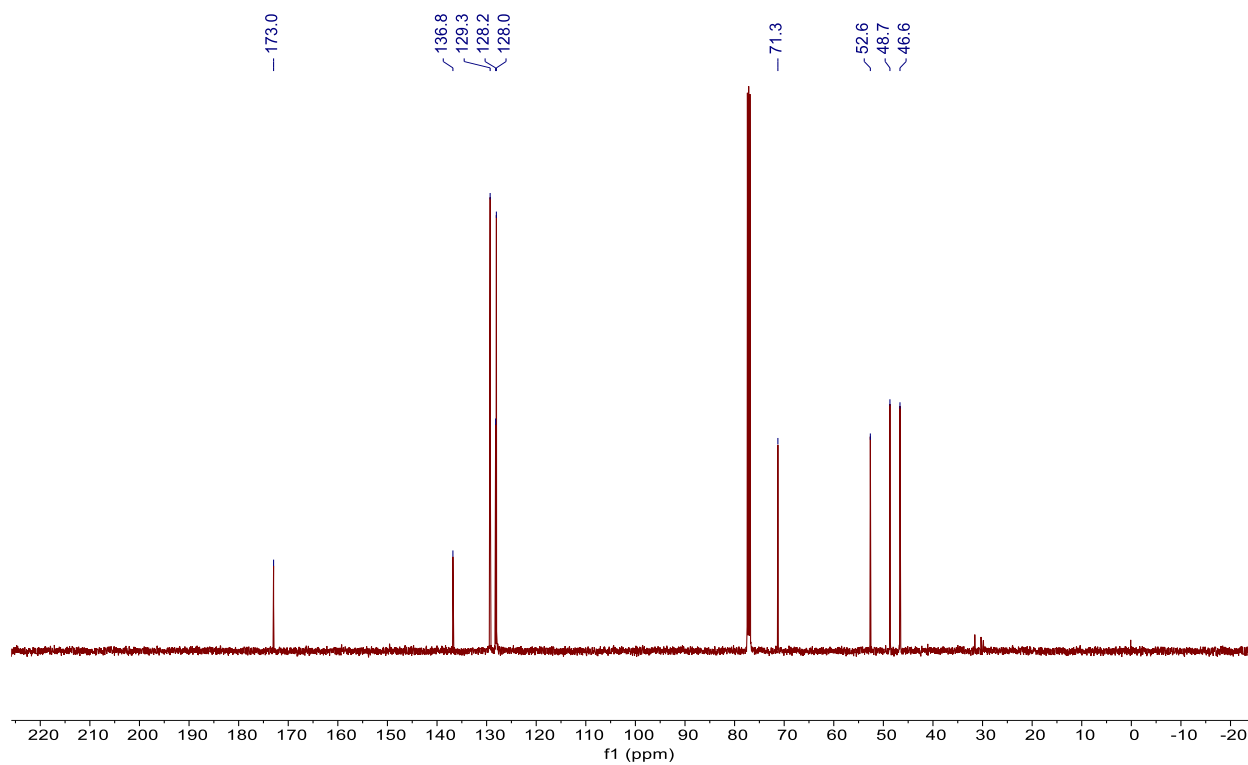

**<sup>1</sup>H NMR of 3 (500 MHz, CDCl<sub>3</sub>)**

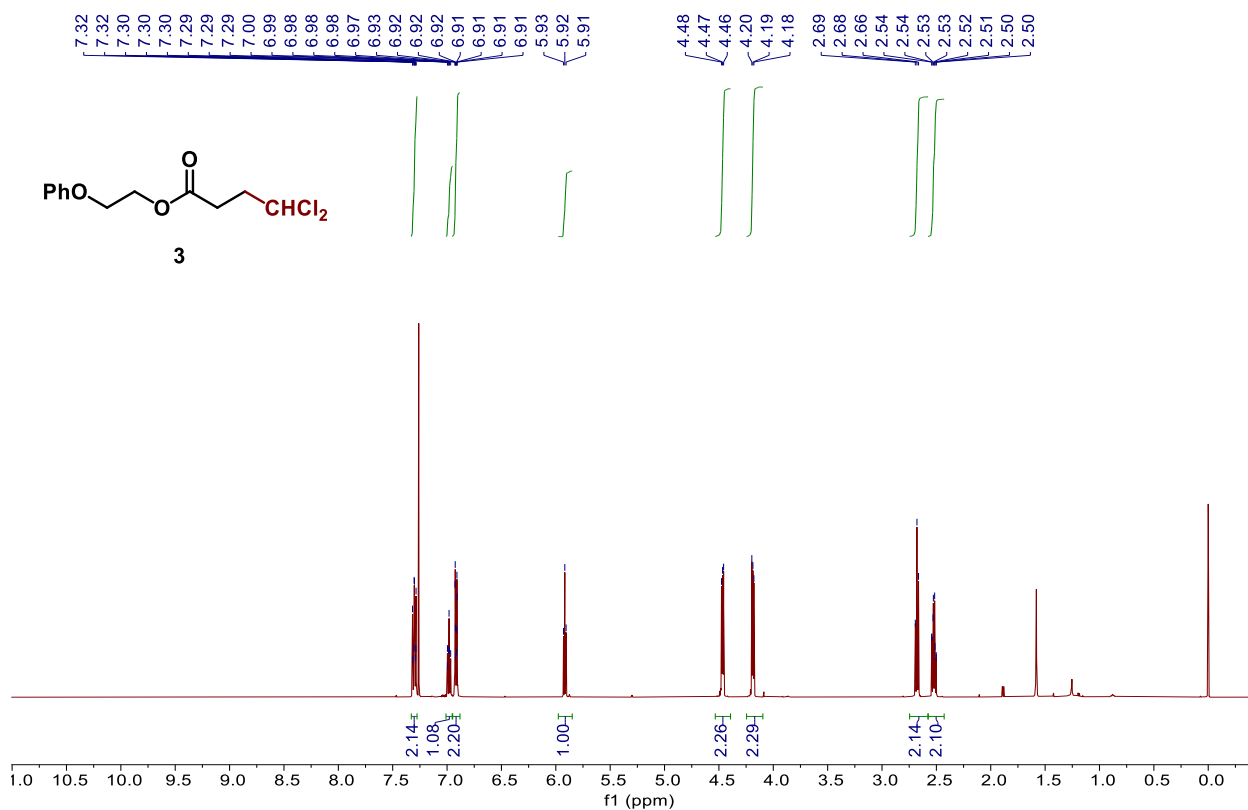

**<sup>13</sup>C NMR of 3 (101 MHz, CDCl<sub>3</sub>)**

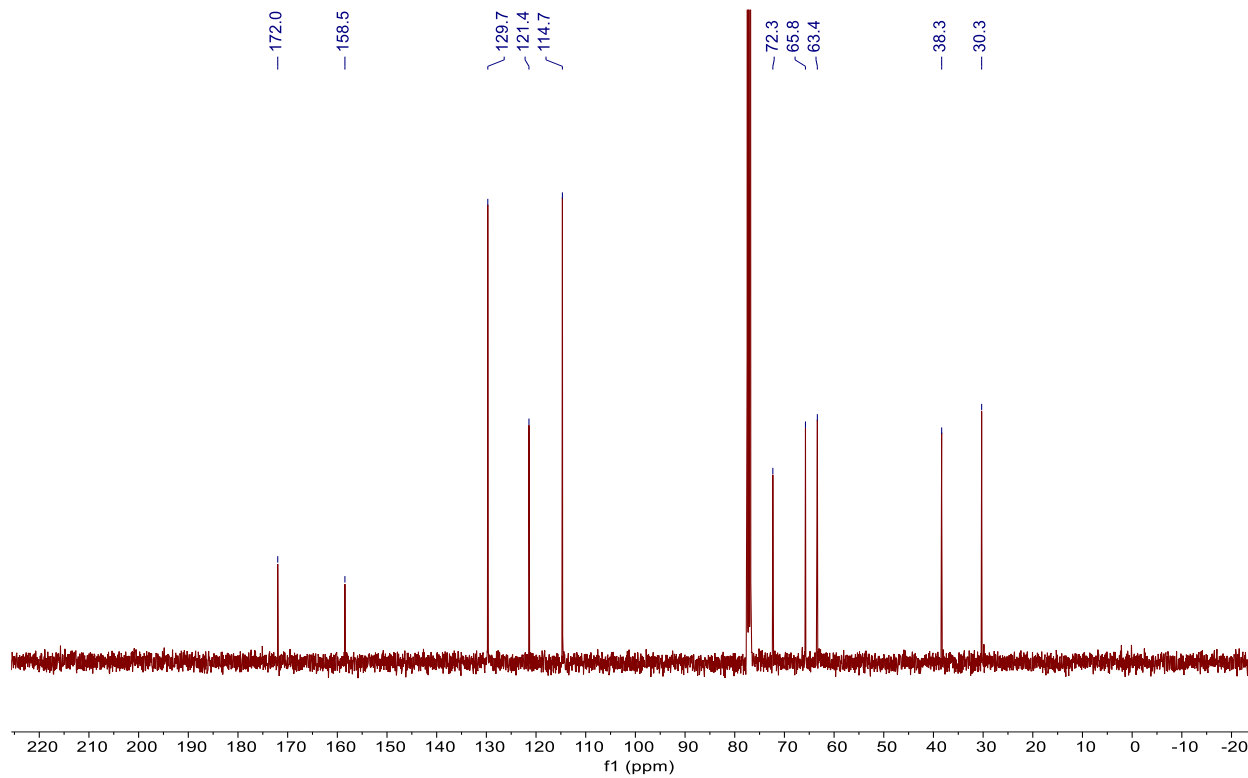

**<sup>1</sup>H NMR of 4 (500 MHz, CDCl<sub>3</sub>)**

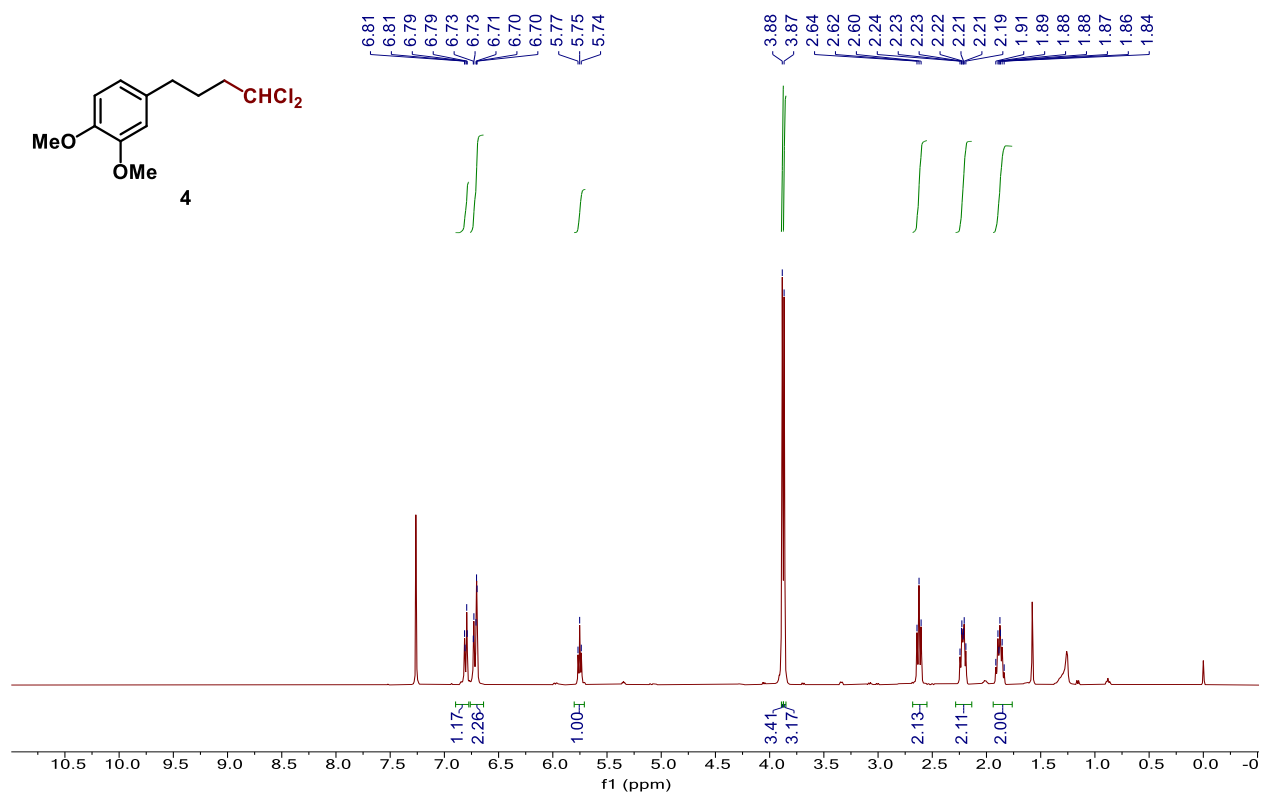

**<sup>13</sup>C NMR of 4 (101 MHz, CDCl<sub>3</sub>)**

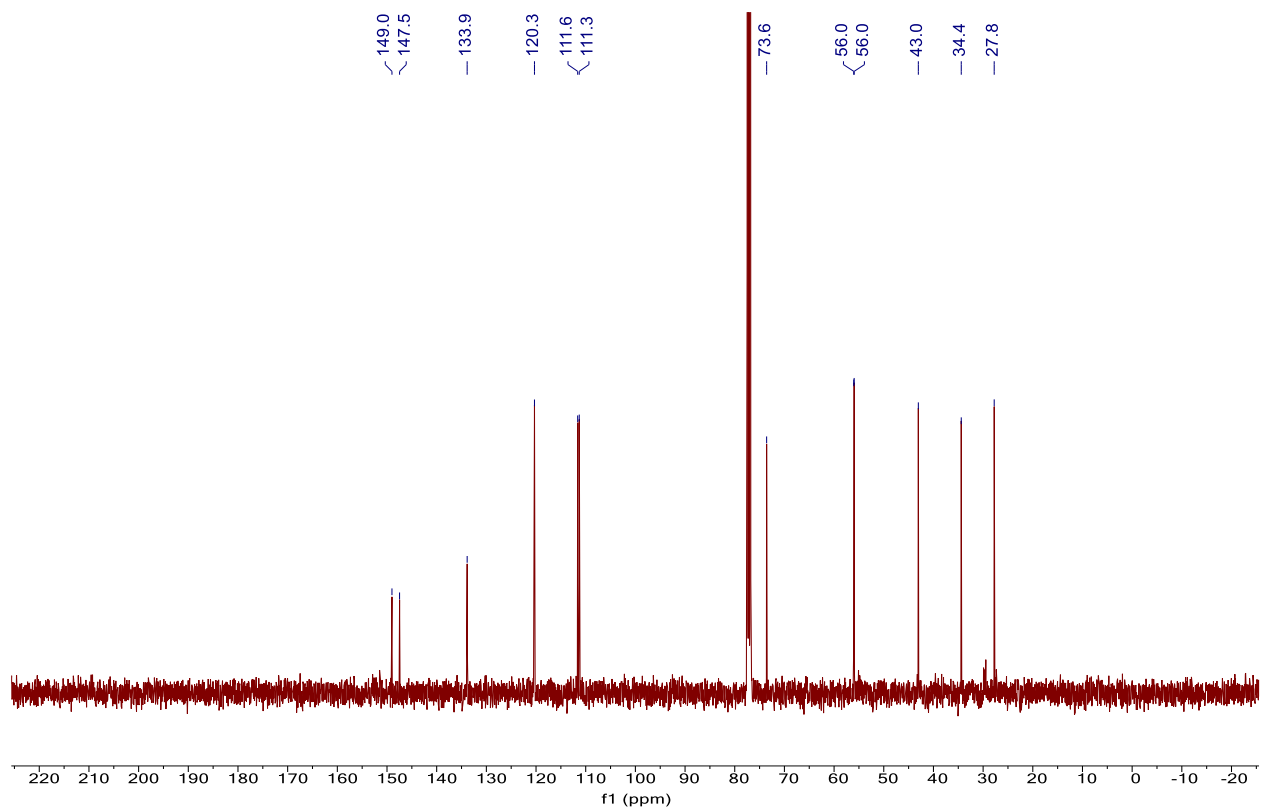

### <sup>1</sup>H NMR of 5 (400 MHz, CDCl<sub>3</sub>)

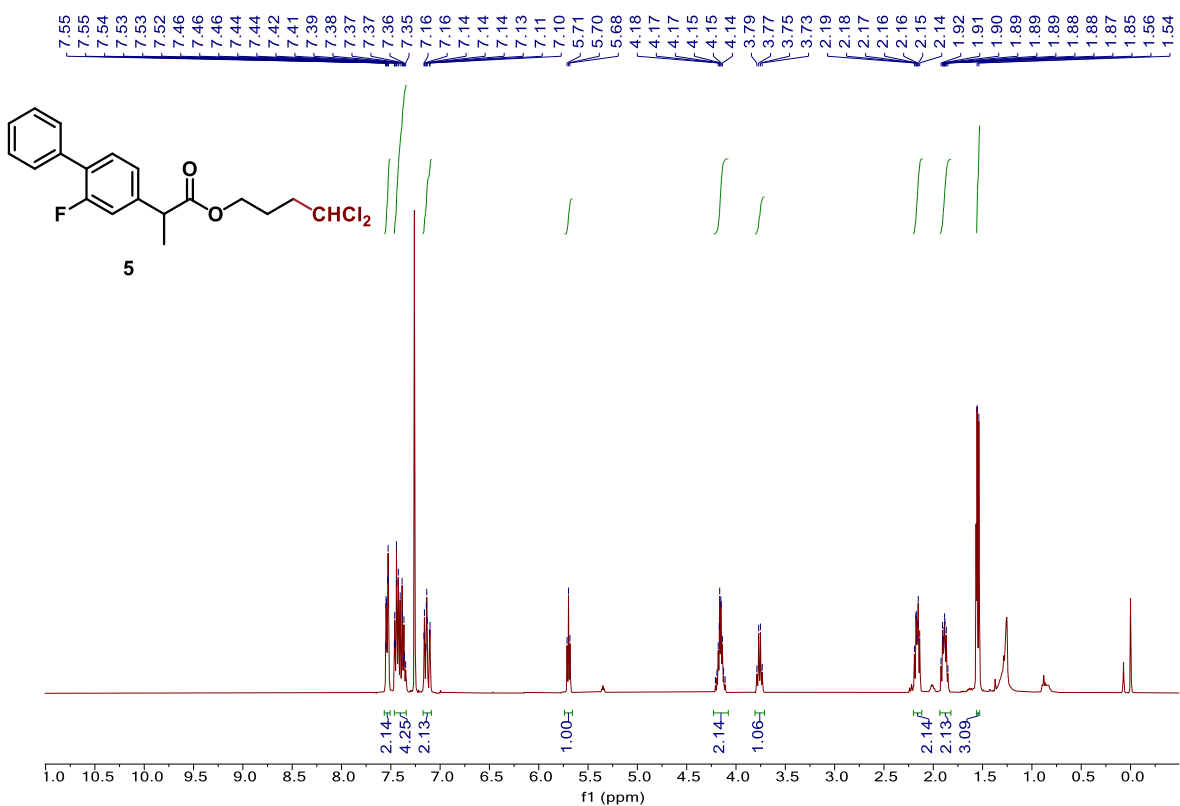

### <sup>13</sup>C NMR of 5 (126 MHz, CDCl<sub>3</sub>)

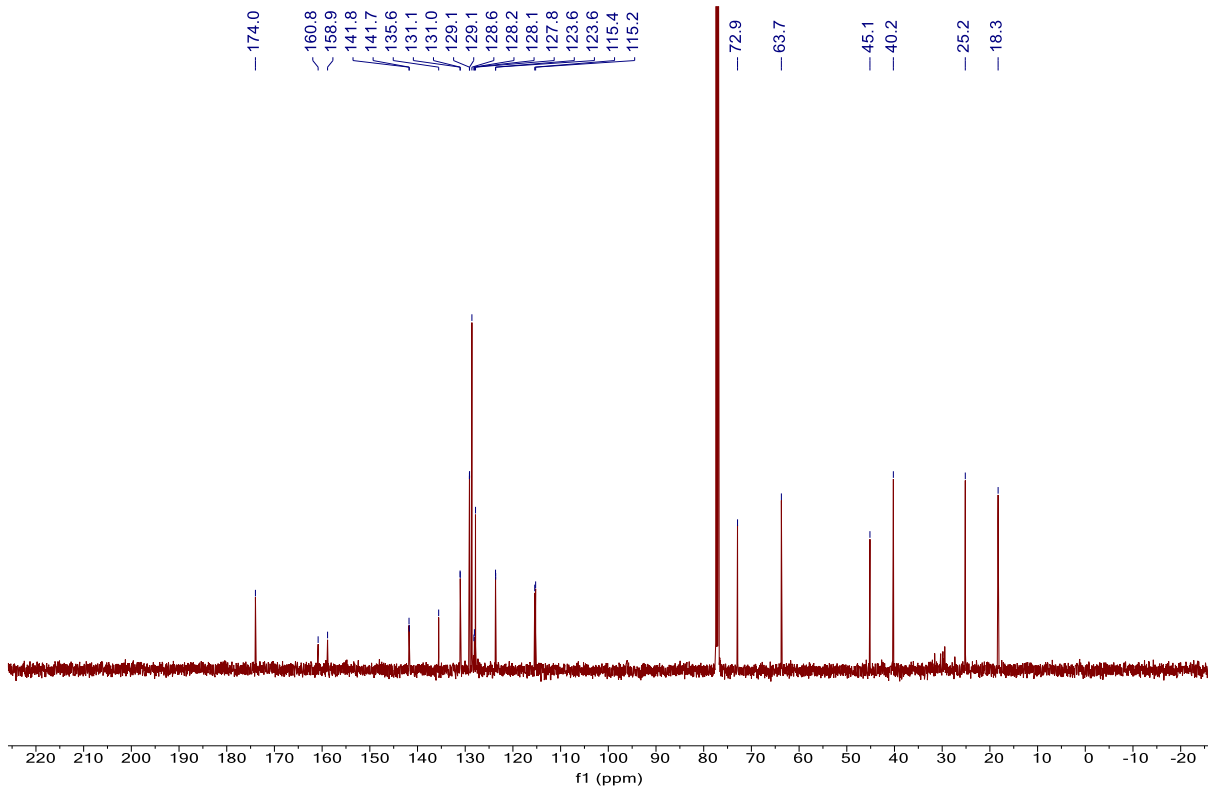

**$^{19}\text{F}$  NMR of 5 (471 MHz,  $\text{CDCl}_3$ )**

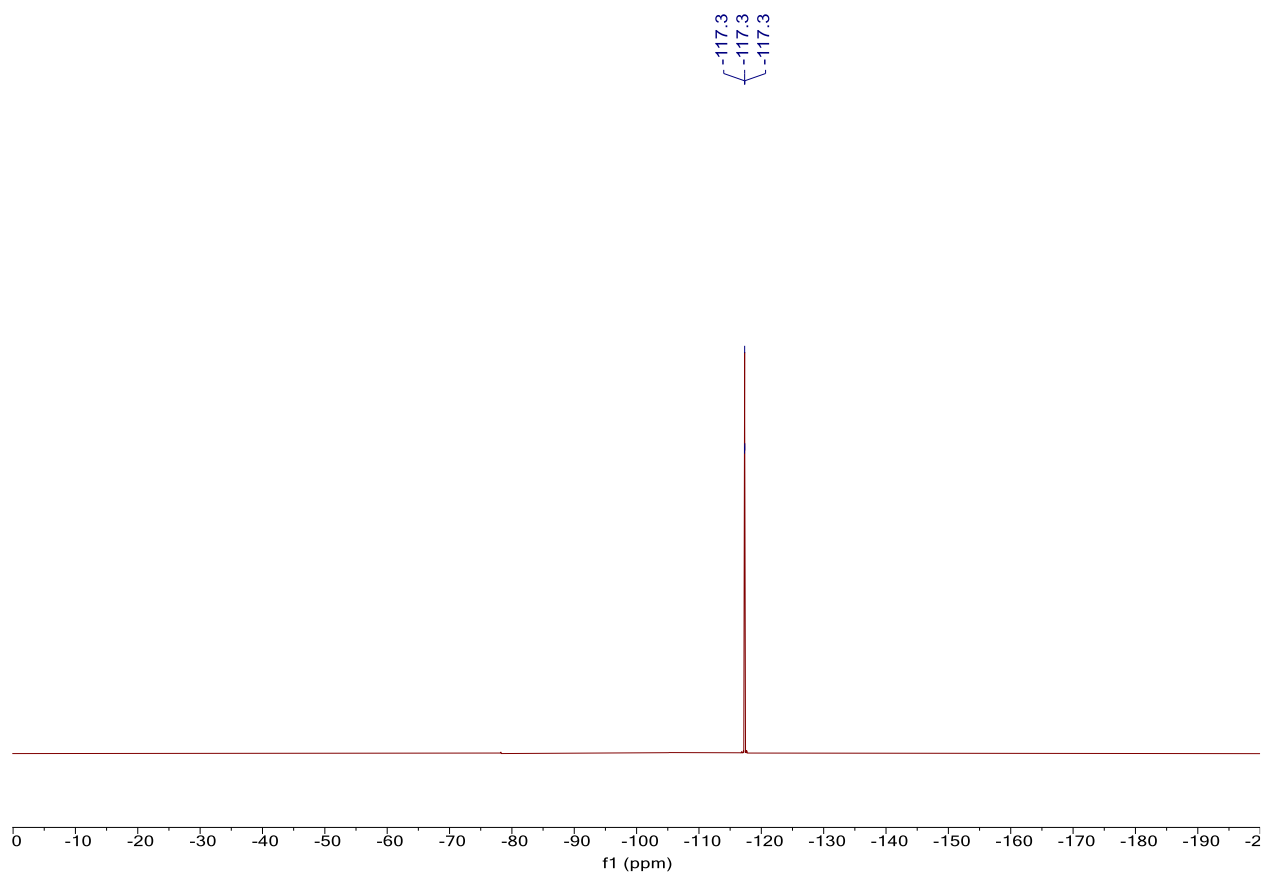

**<sup>1</sup>H NMR of 6 (400 MHz, CDCl<sub>3</sub>)**

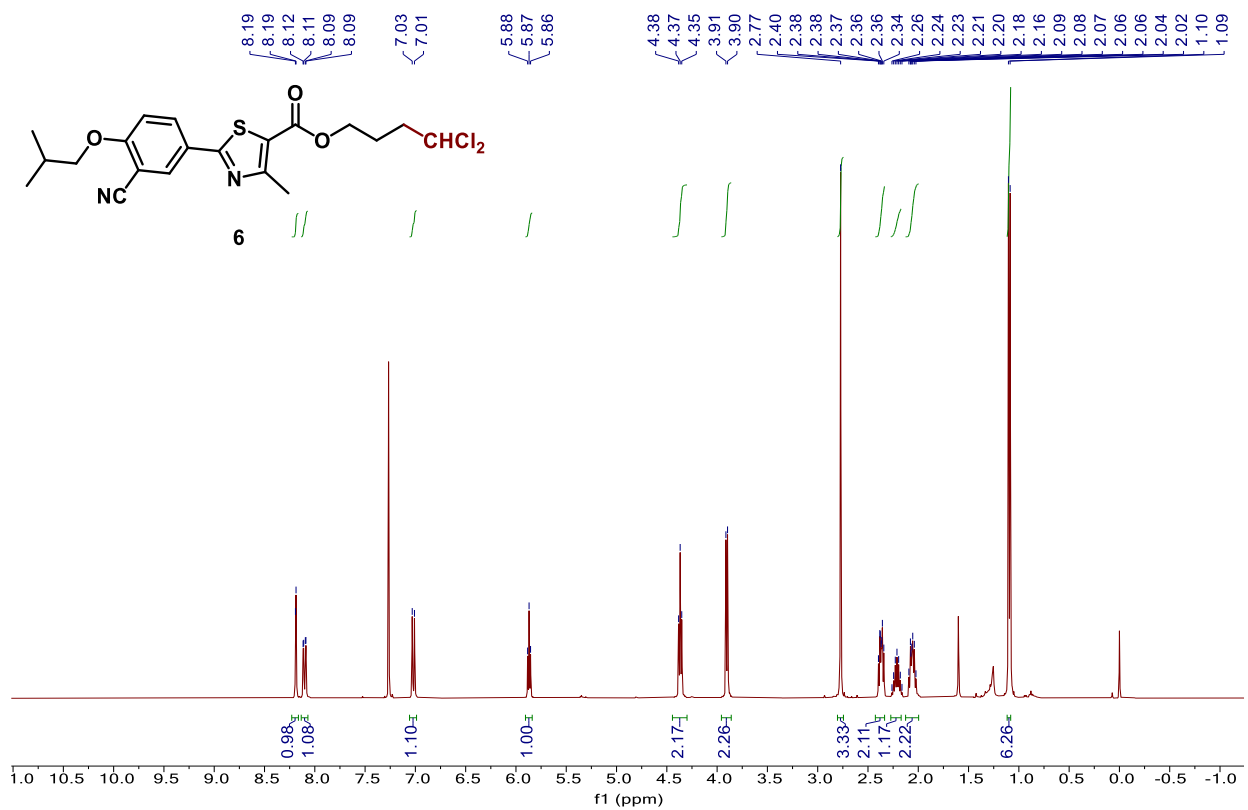

**<sup>13</sup>C NMR of 6 (101 MHz, CDCl<sub>3</sub>)**

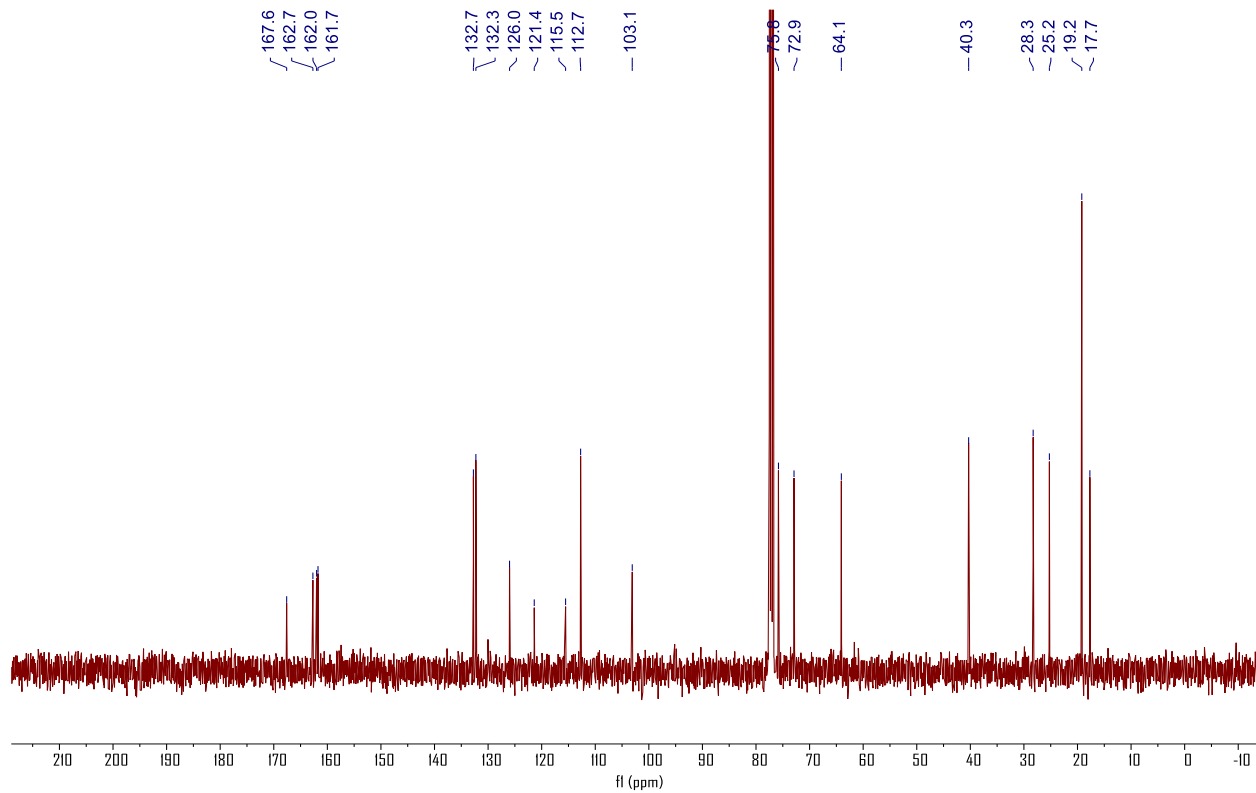



**<sup>1</sup>H NMR of 7 (500 MHz, CDCl<sub>3</sub>)**

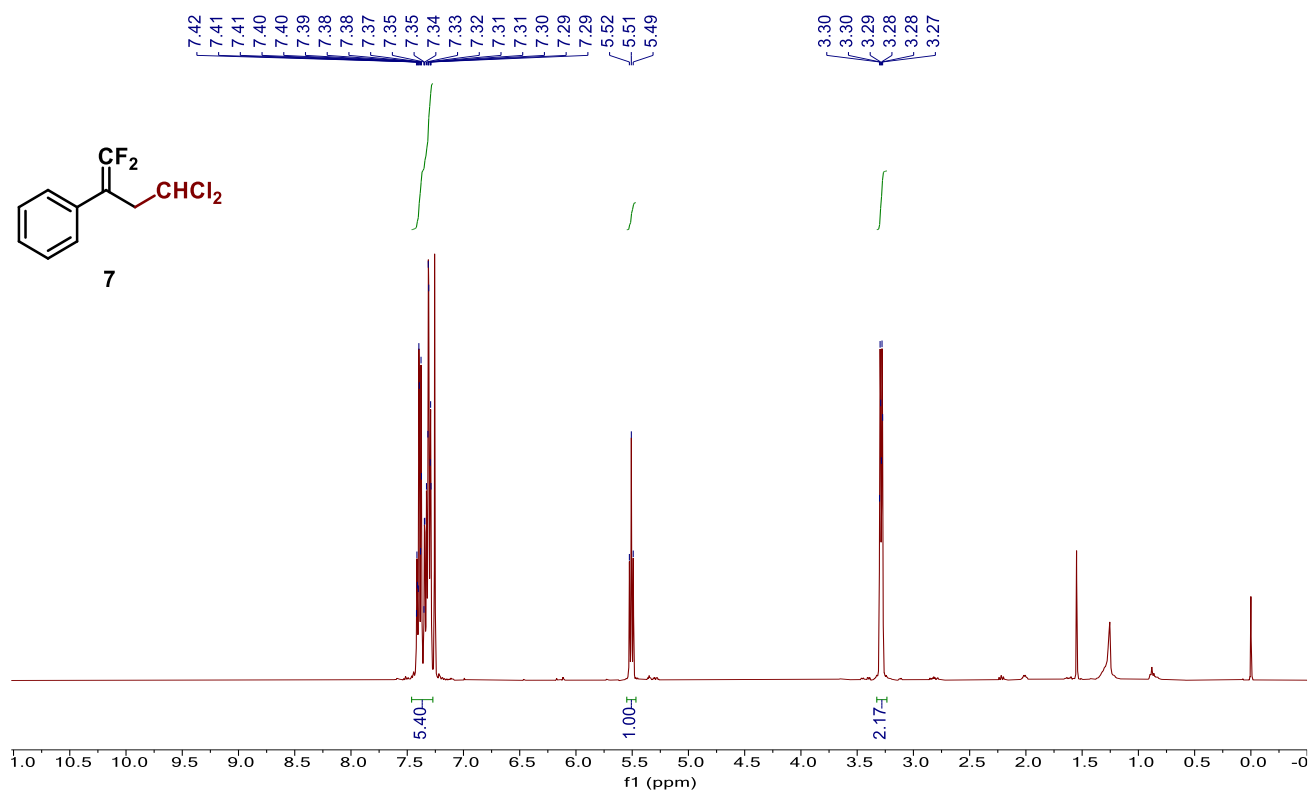

**<sup>13</sup>C NMR of 7 (126 MHz, CDCl<sub>3</sub>)**

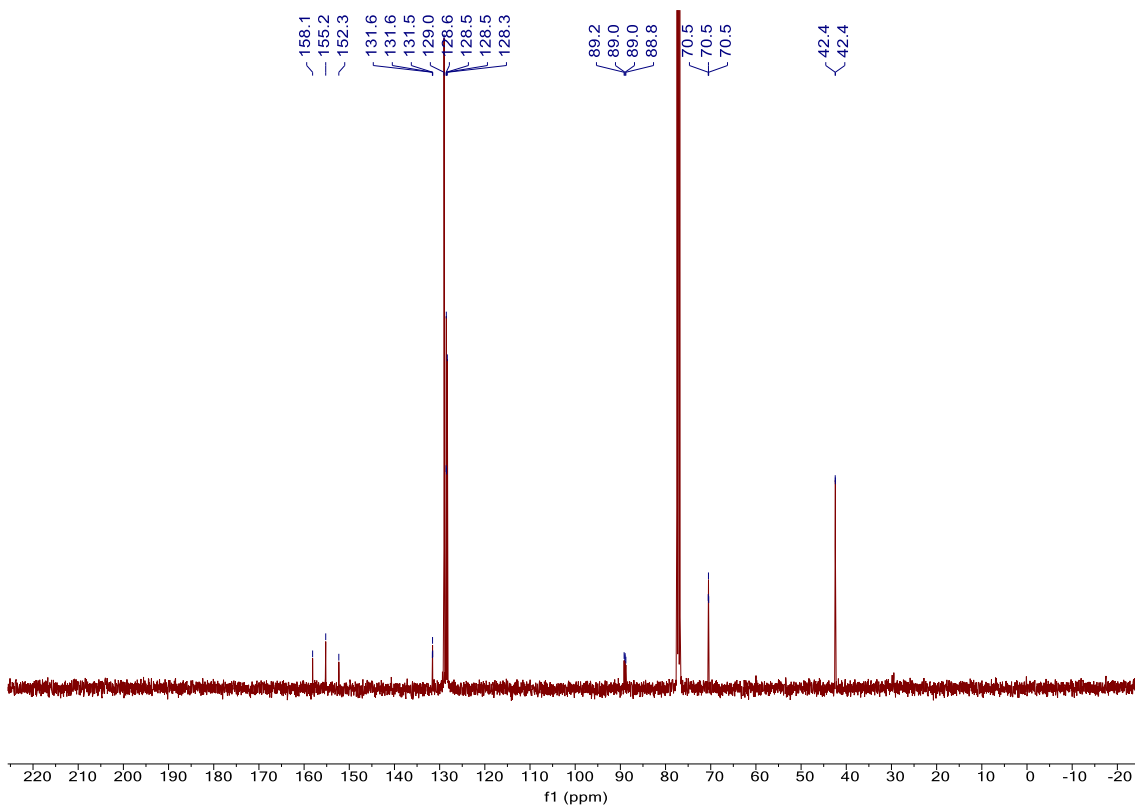

**<sup>19</sup>F NMR of 7 (376 MHz, CDCl<sub>3</sub>)**

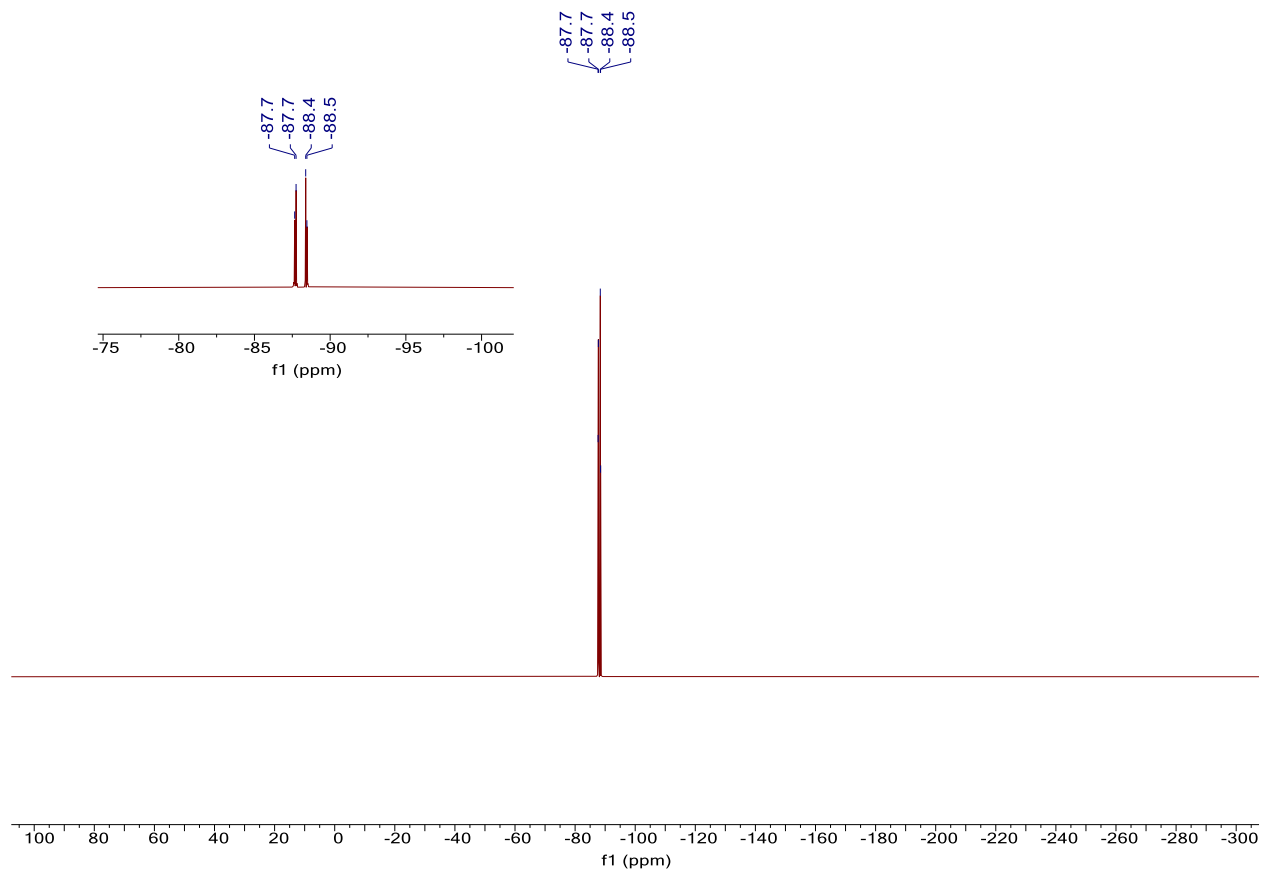

**<sup>1</sup>H NMR of 8 (500 MHz, CDCl<sub>3</sub>)**

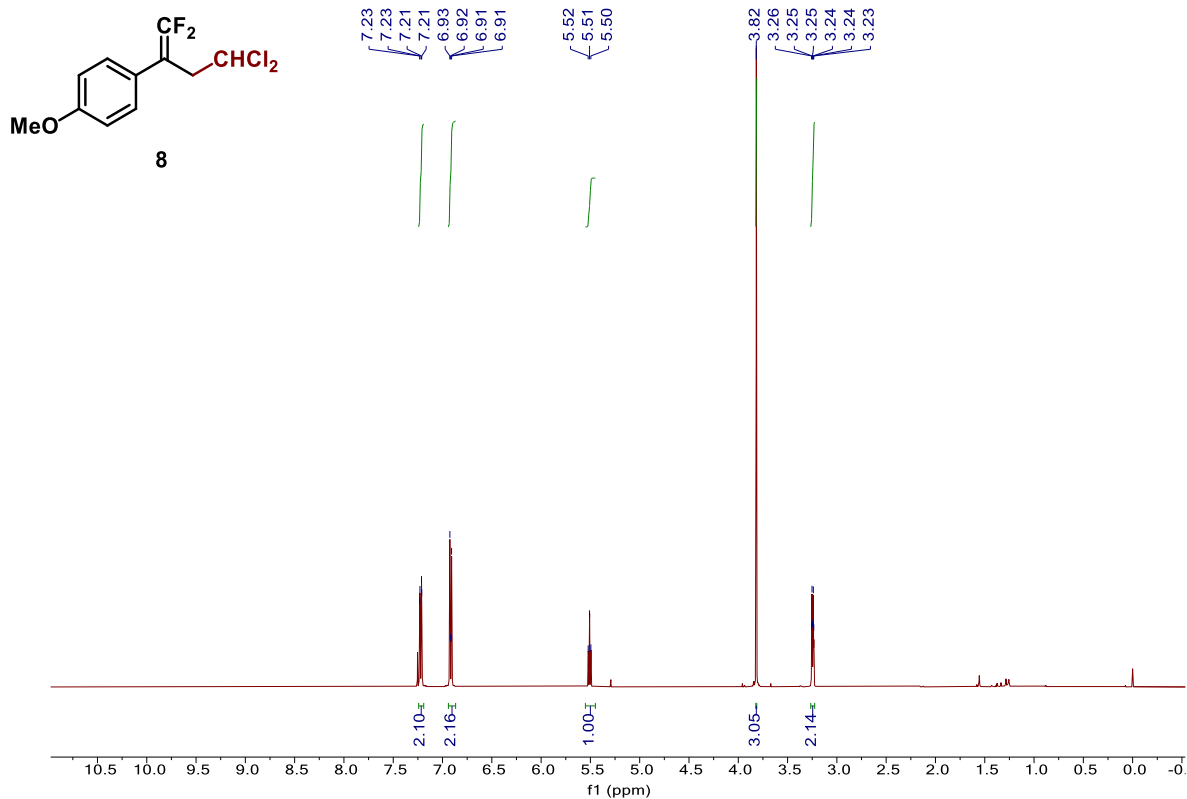

**<sup>13</sup>C NMR of 8 (126 MHz, CDCl<sub>3</sub>)**

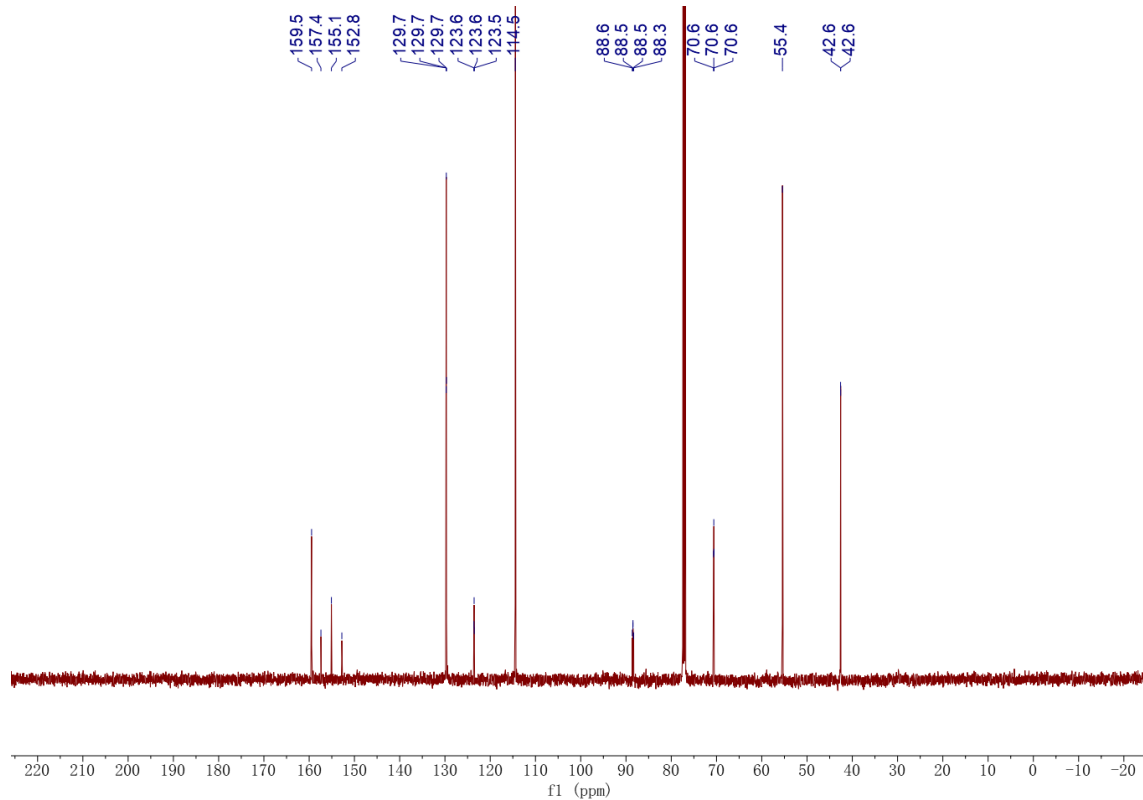

**$^{19}\text{F}$  NMR of 8 (471 MHz,  $\text{CDCl}_3$ )**

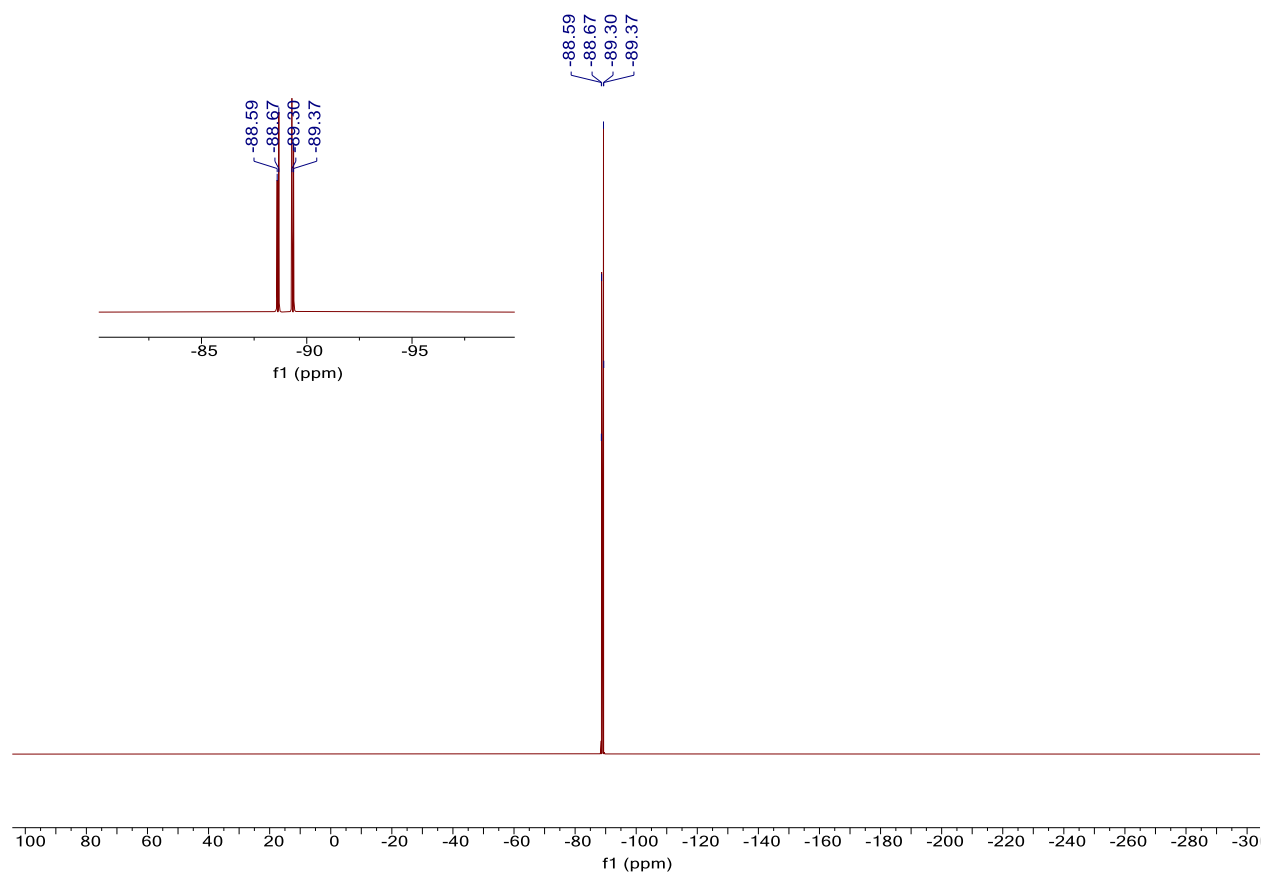

**<sup>1</sup>H NMR of 9 (500 MHz, CDCl<sub>3</sub>)**

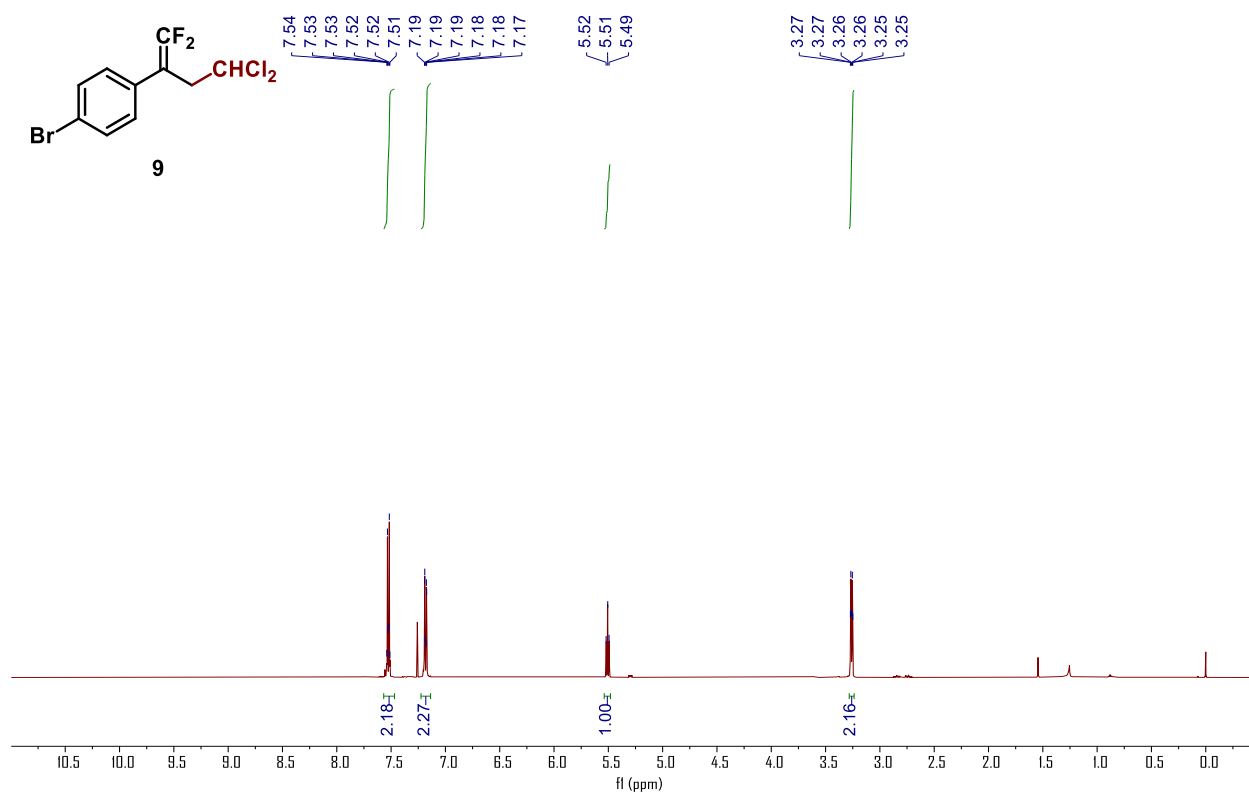

**<sup>13</sup>C NMR of 9 (126 MHz, CDCl<sub>3</sub>)**

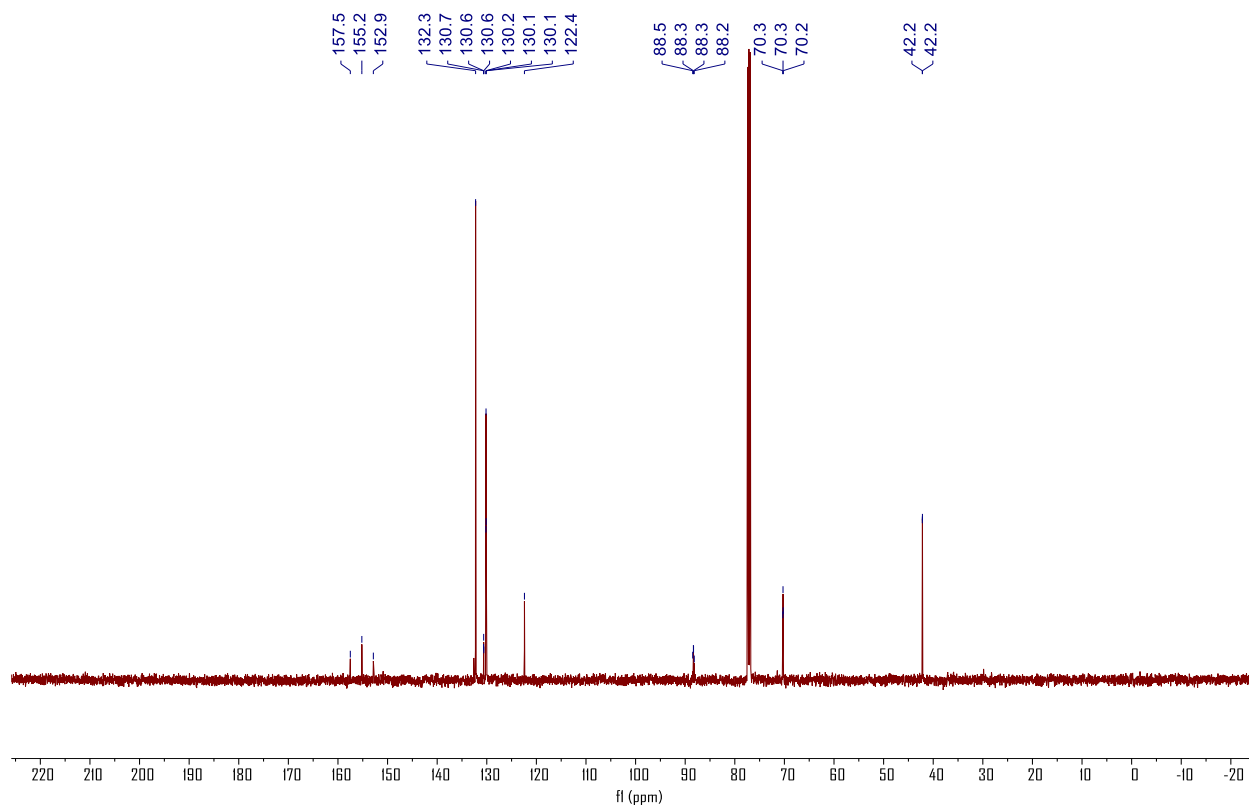

**$^{19}\text{F}$  NMR of 9 (471 MHz,  $\text{CDCl}_3$ )**

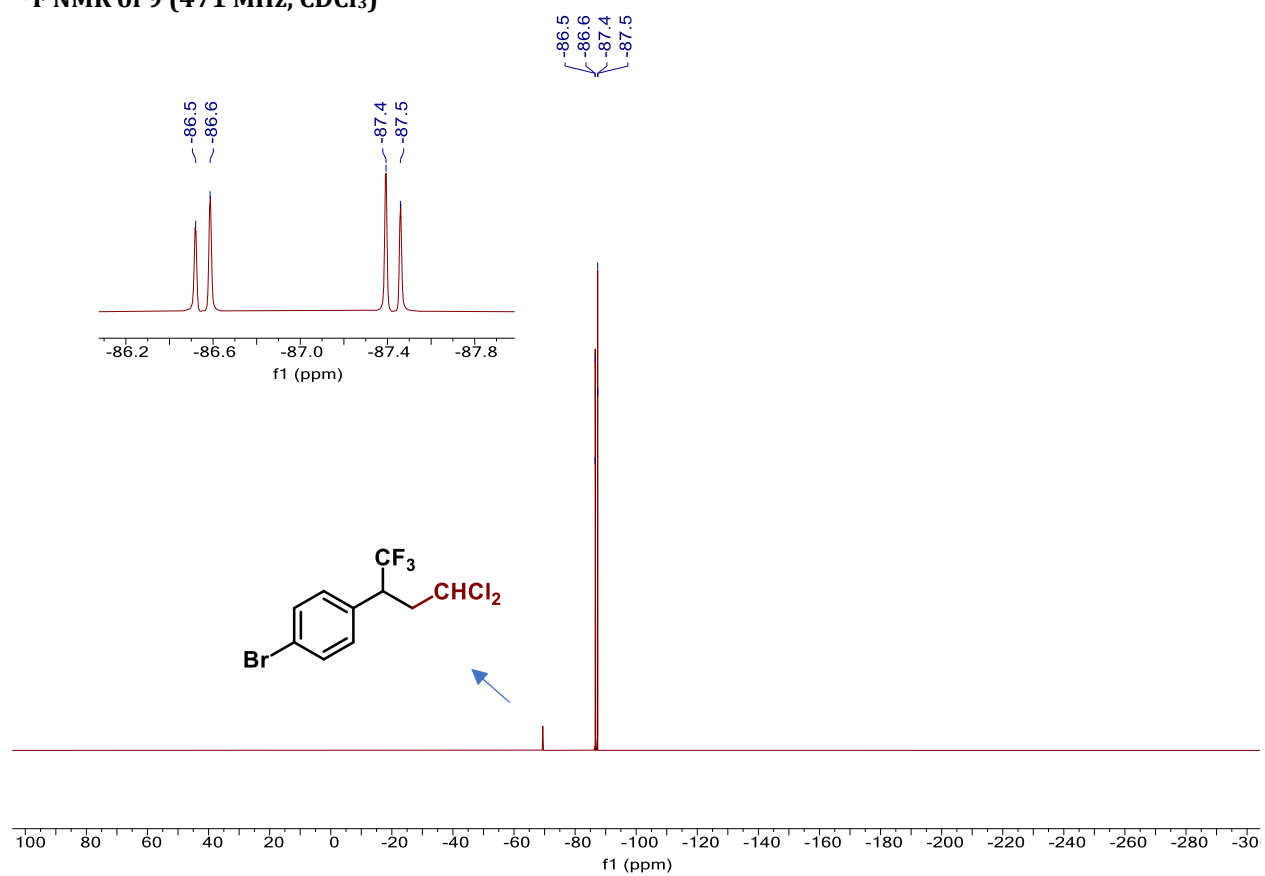

**<sup>1</sup>H NMR of 10 (400 MHz, CDCl<sub>3</sub>)**

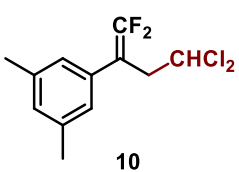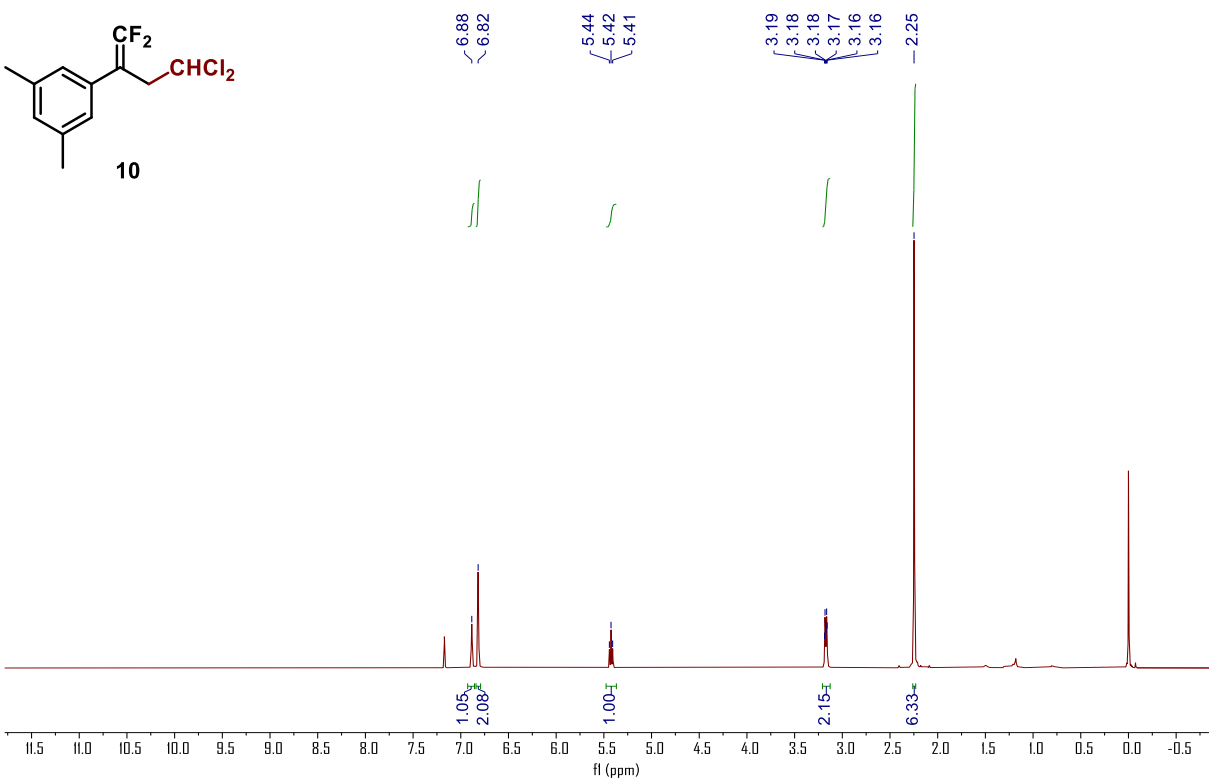

**<sup>13</sup>C NMR of 10 (126 MHz, CDCl<sub>3</sub>)**

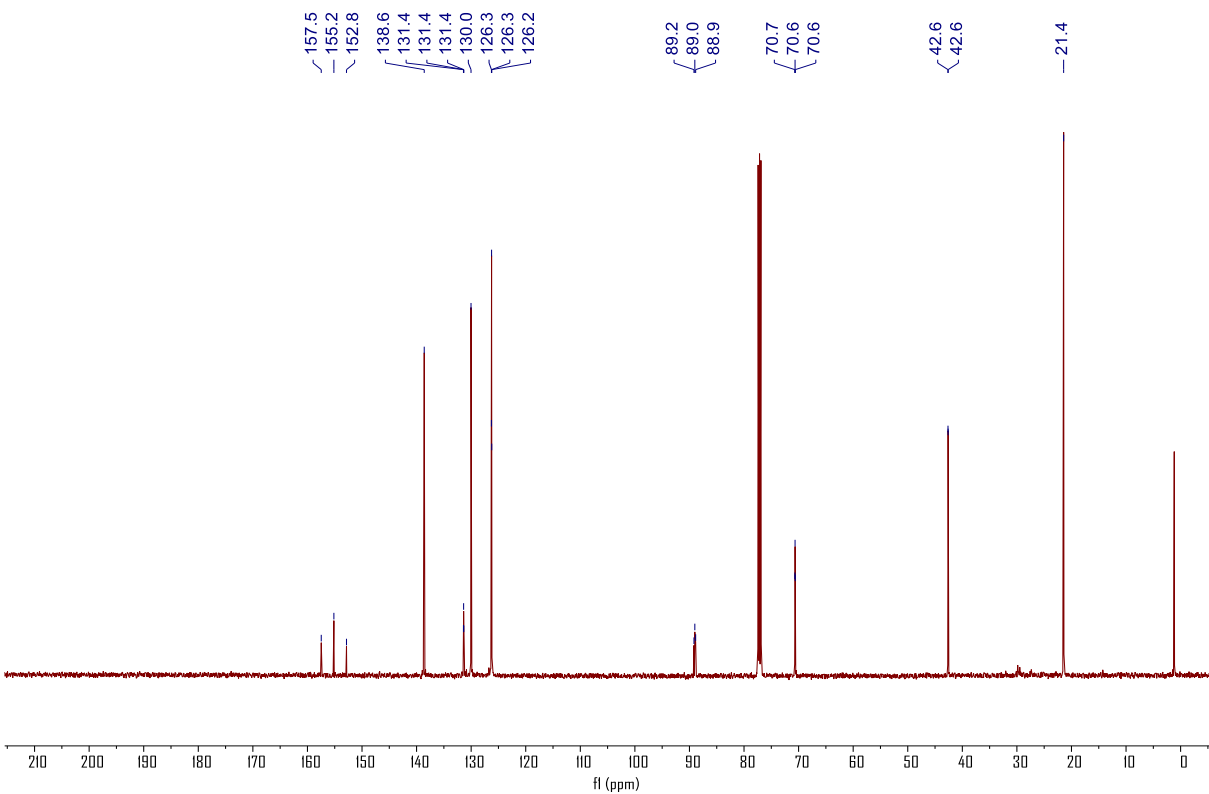

**$^{19}\text{F}$  NMR of 10 (376 MHz,  $\text{CDCl}_3$ )**

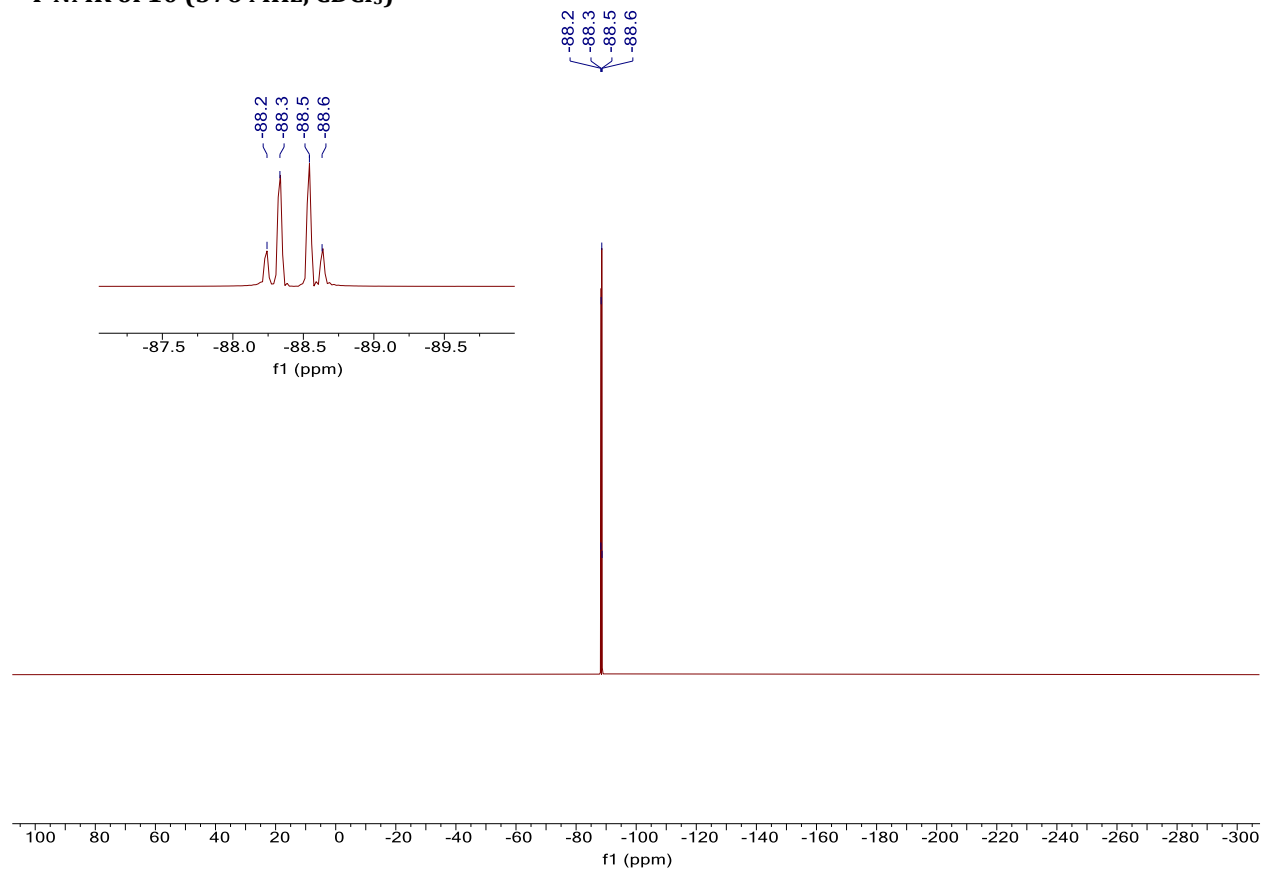



**<sup>1</sup>H NMR of 11 (400 MHz, CDCl<sub>3</sub>)**

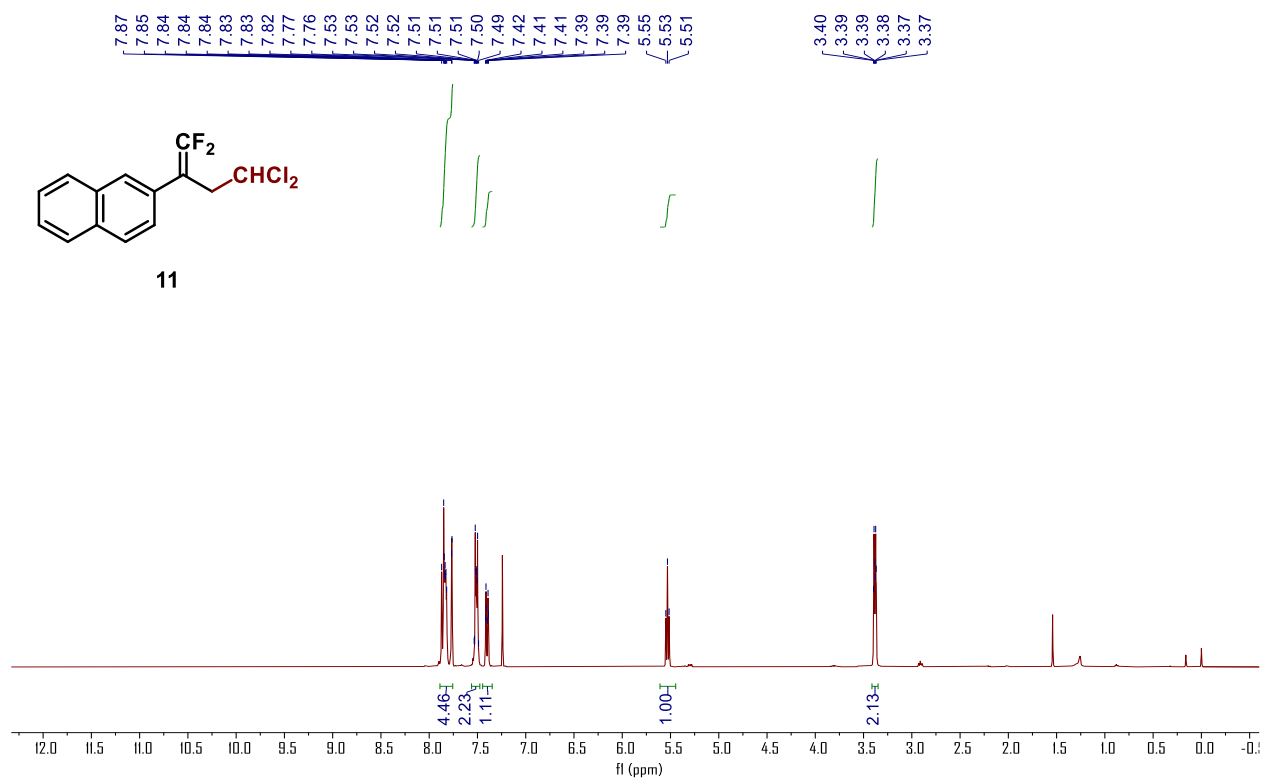

**<sup>13</sup>C NMR of 11 (101 MHz, CDCl<sub>3</sub>)**

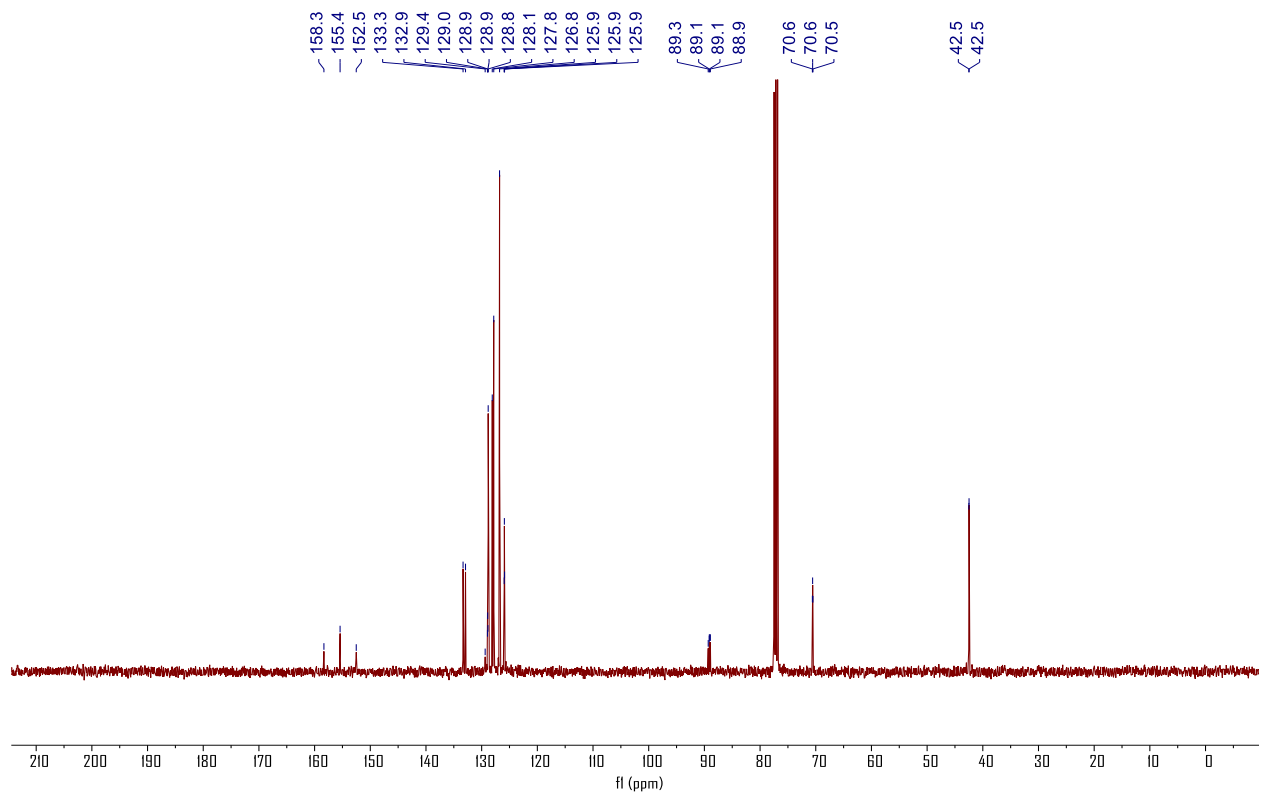

**$^{19}\text{F}$  NMR of 11 (376 MHz,  $\text{CDCl}_3$ )**

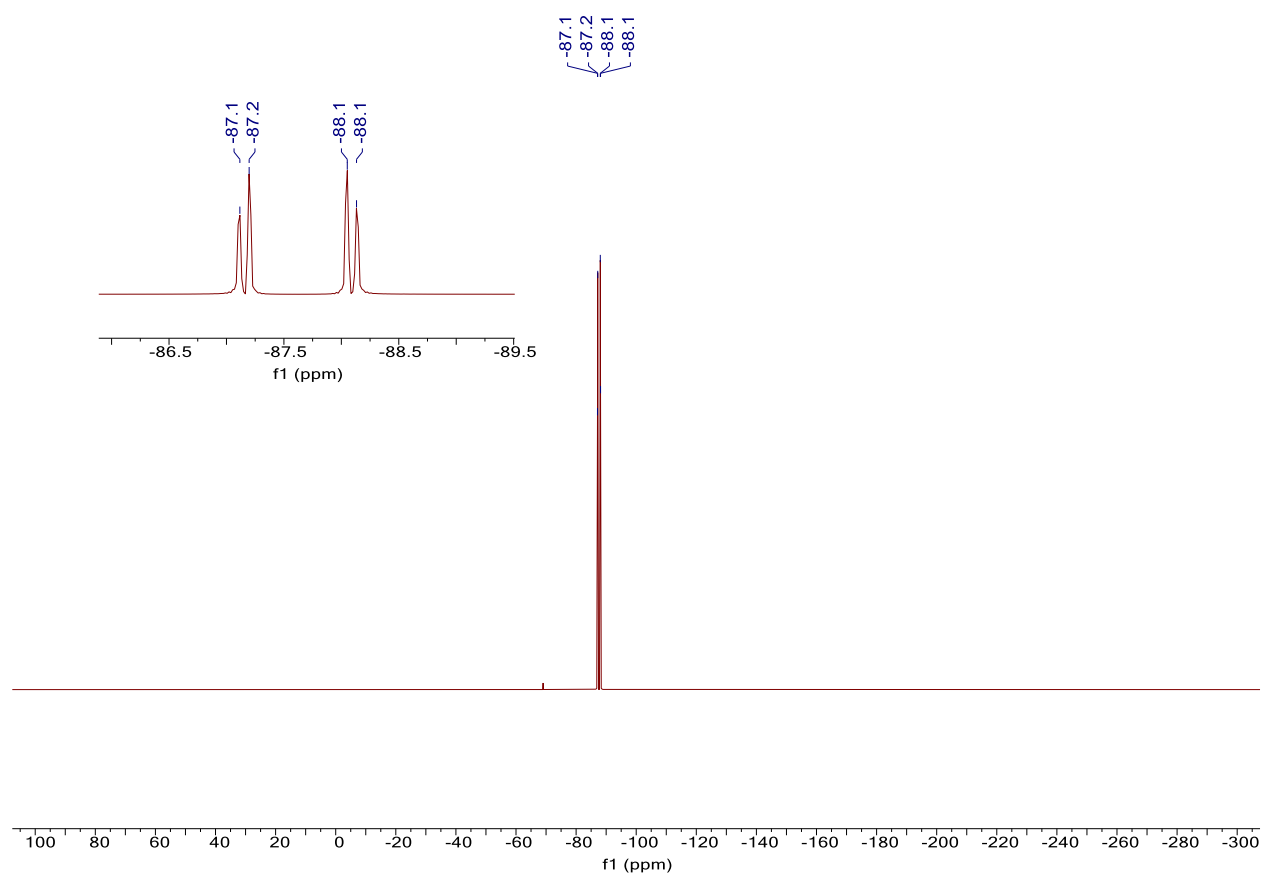

**<sup>1</sup>H NMR of 12 (400 MHz, CDCl<sub>3</sub>)**

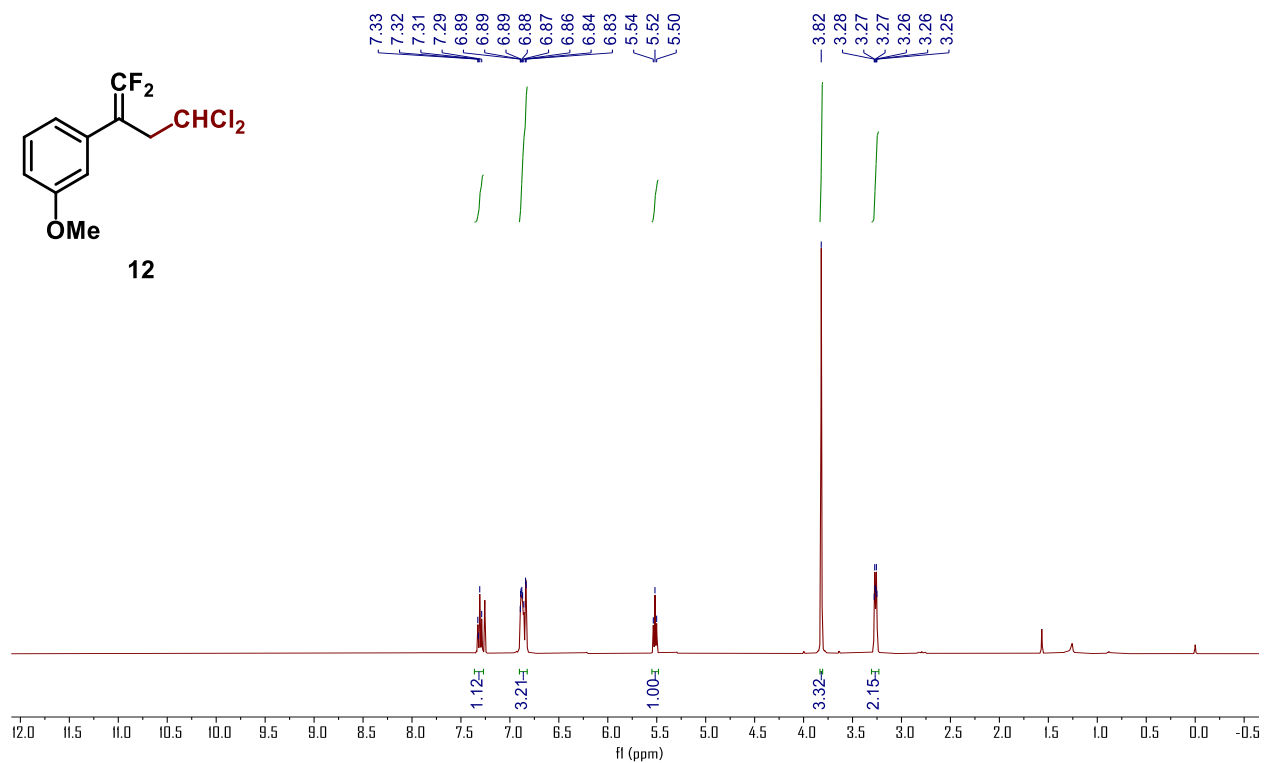

**<sup>13</sup>C NMR of 12 (101 MHz, CDCl<sub>3</sub>)**

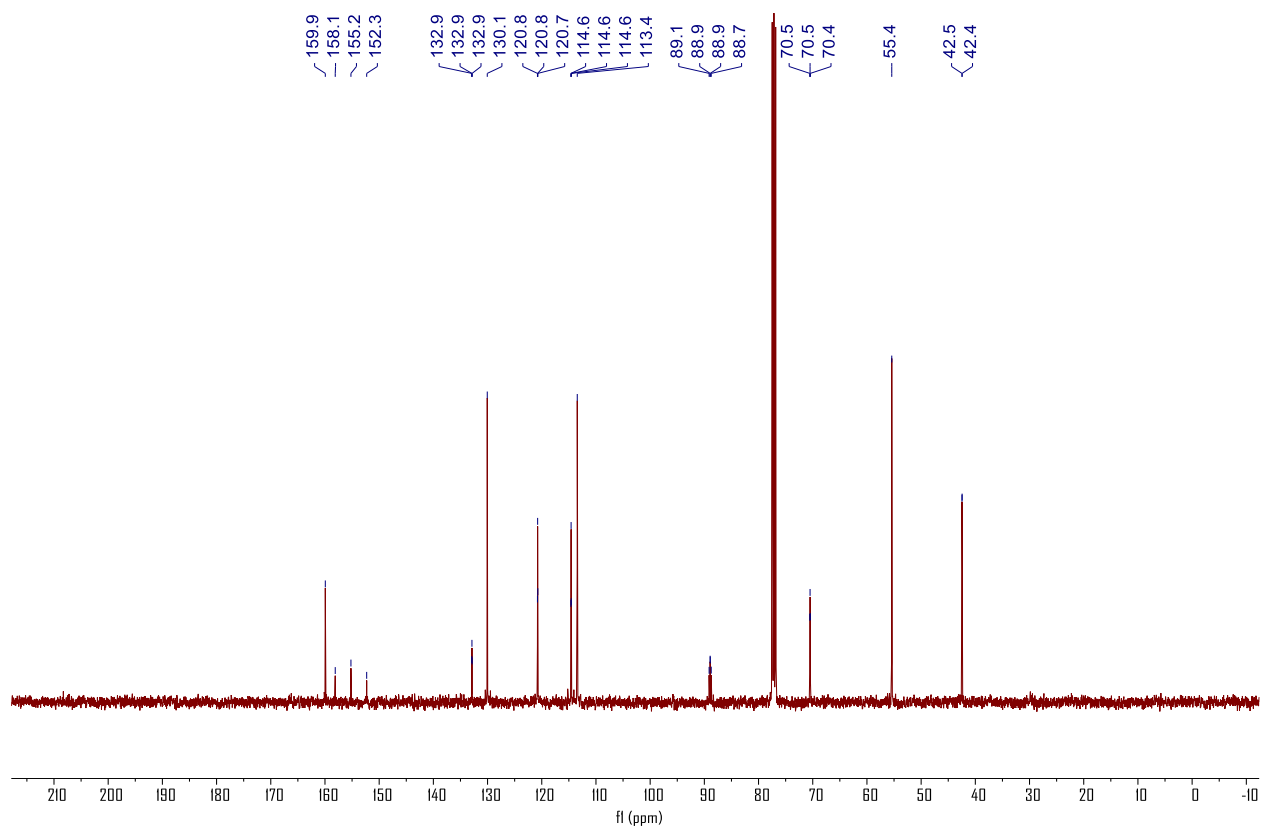

**$^{19}\text{F}$  NMR of 12 (376 MHz,  $\text{CDCl}_3$ )**

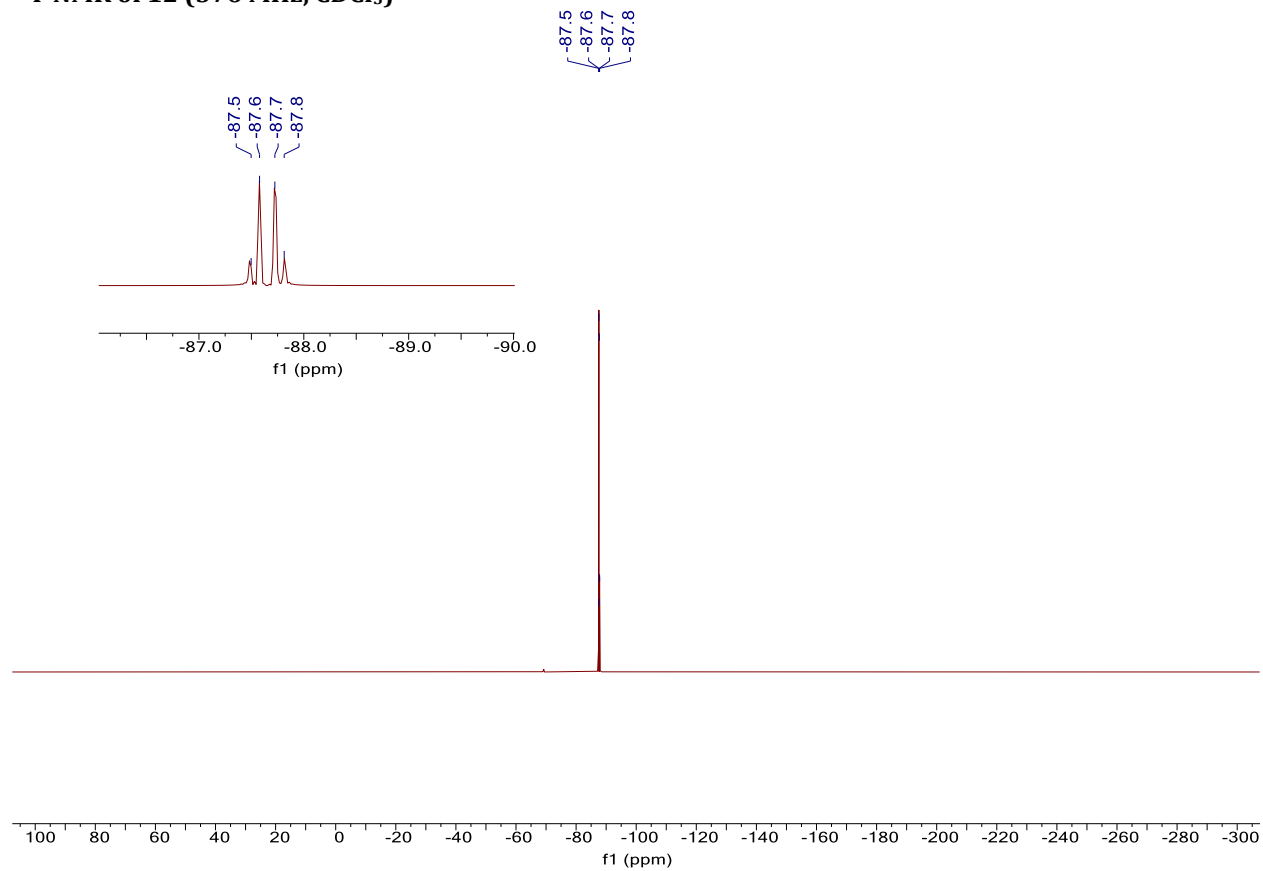

**<sup>1</sup>H NMR of 13 (400 MHz, CDCl<sub>3</sub>)**

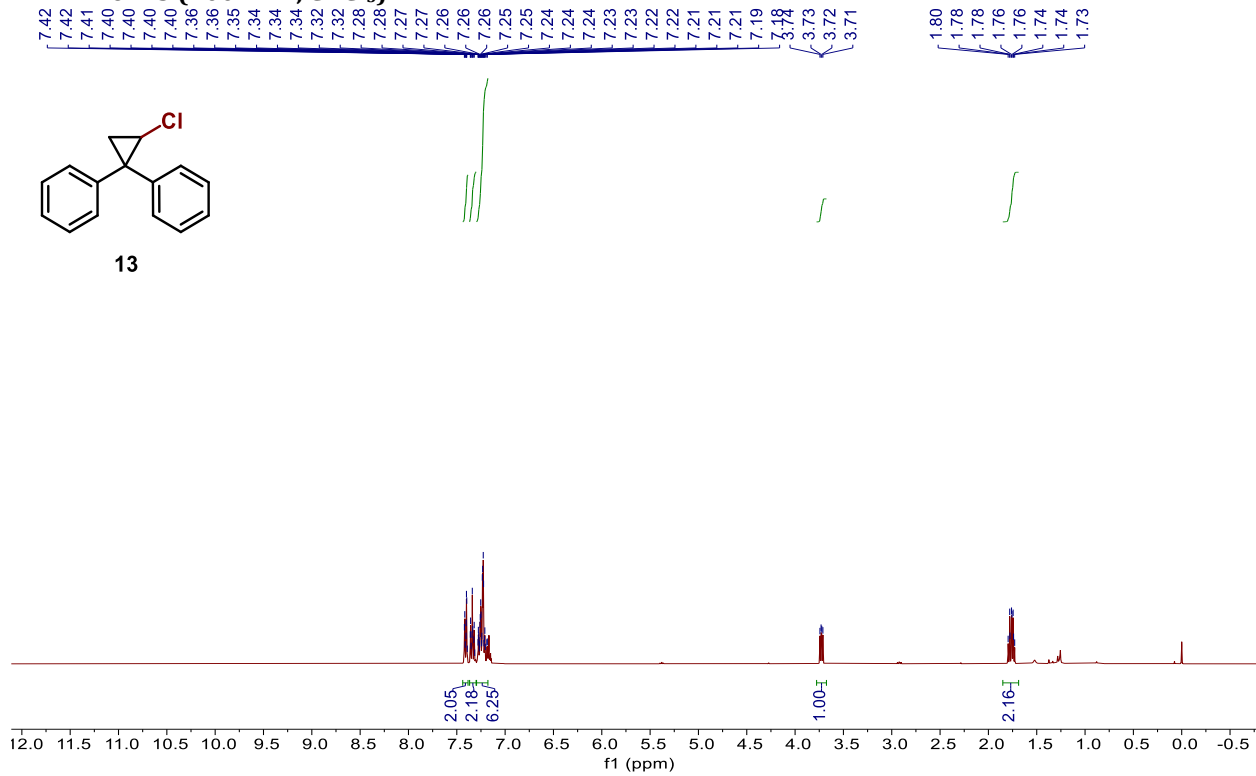

**<sup>13</sup>C NMR of 13 (101 MHz, CDCl<sub>3</sub>)**

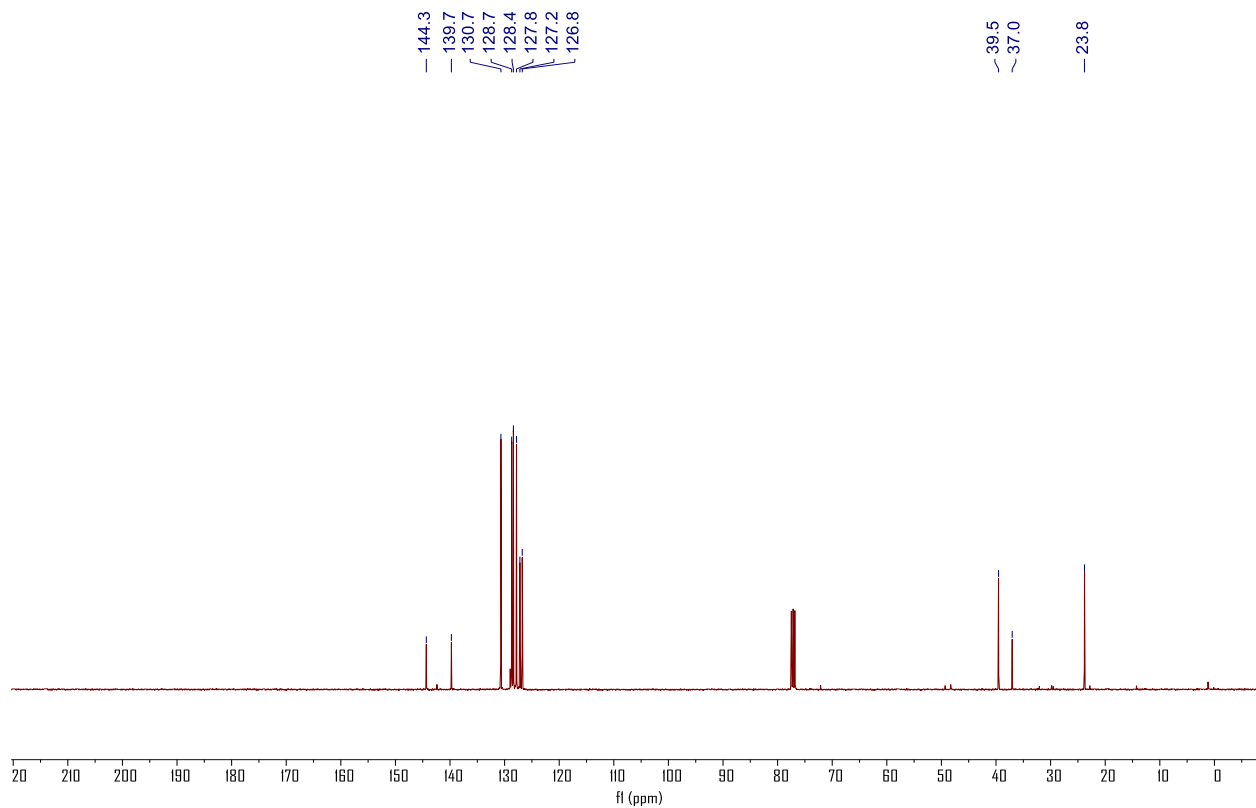

**<sup>1</sup>H NMR of 14 (500 MHz, CDCl<sub>3</sub>)**

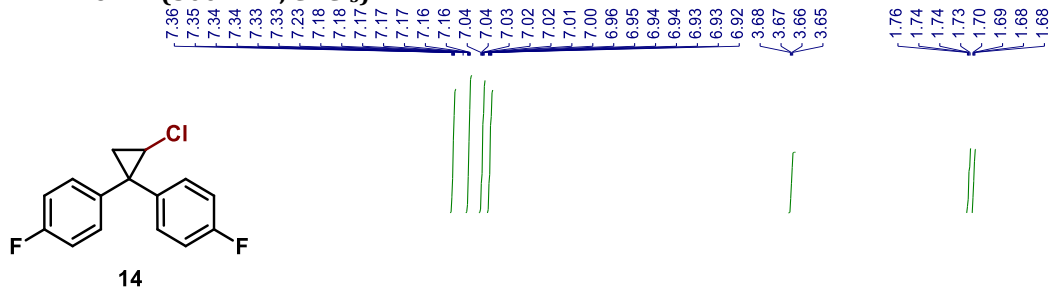

**<sup>13</sup>C NMR of 14 (126 MHz, CDCl<sub>3</sub>)**

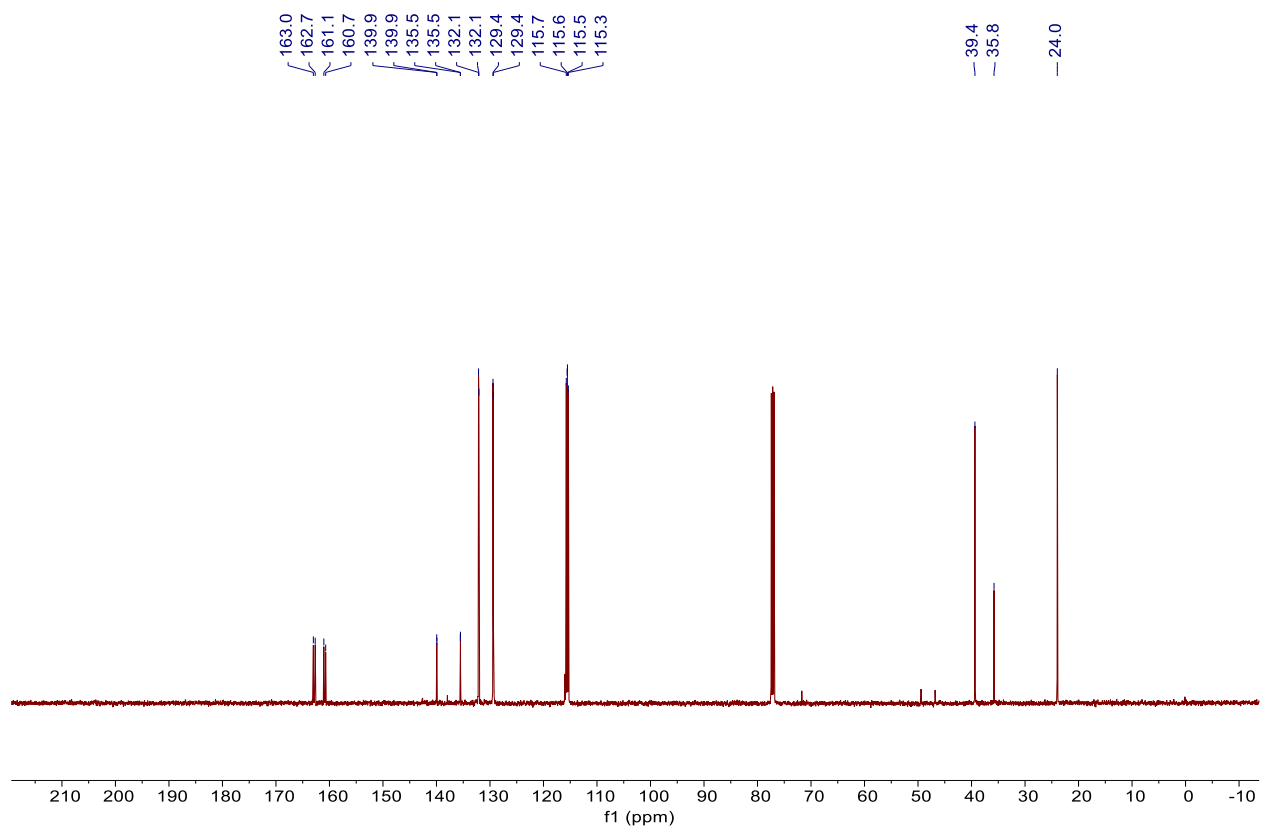

**<sup>19</sup>F NMR of 14 (471 MHz, CDCl<sub>3</sub>)**

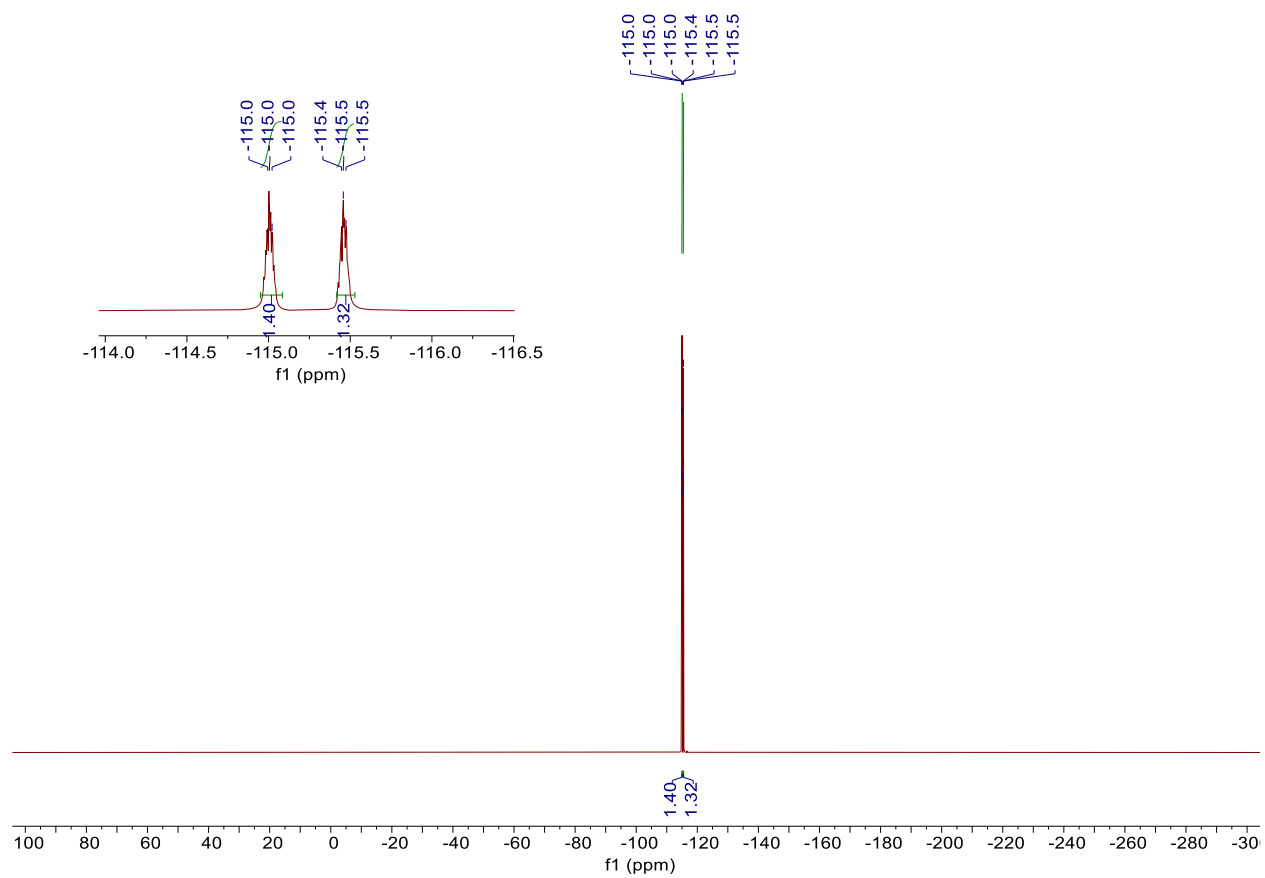

**<sup>1</sup>H NMR of 15 (500 MHz, CDCl<sub>3</sub>)**

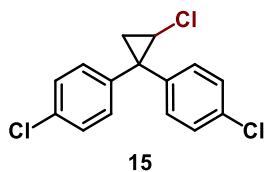

7.3283  
7.3267  
7.3226  
7.3162  
7.3103  
7.3045  
7.2983  
7.2923  
7.2880  
7.2863  
7.2810  
7.2479  
7.2358  
7.2318  
7.2229  
7.2188  
7.2133  
7.1496  
7.1336  
7.1286  
7.1244  
7.1155  
7.1115

3.6876  
3.6784  
3.6723  
3.6632

1.7671  
1.7538  
1.7516  
1.7387  
1.7188  
1.7096  
1.7056  
1.6965

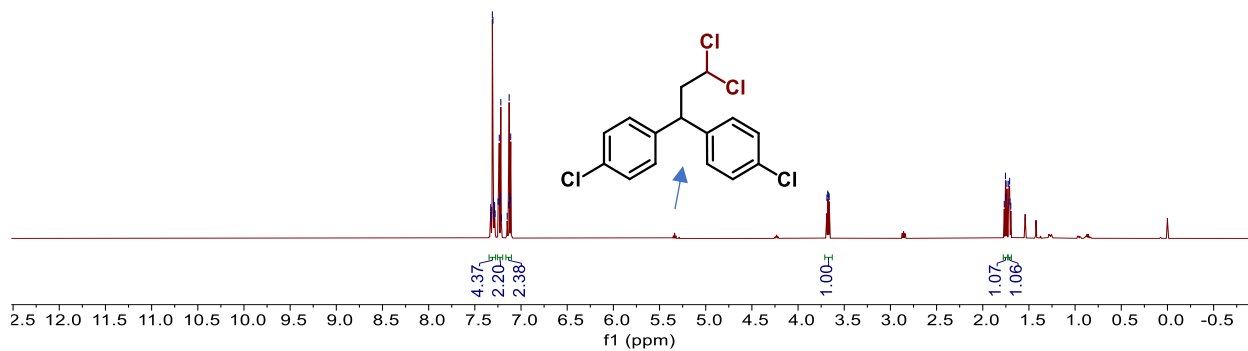

**<sup>13</sup>C NMR of 15 (126 MHz, CDCl<sub>3</sub>)**

142.3  
137.9  
133.4  
132.9  
131.9  
129.1  
129.0  
128.8

39.2  
36.0  
24.0

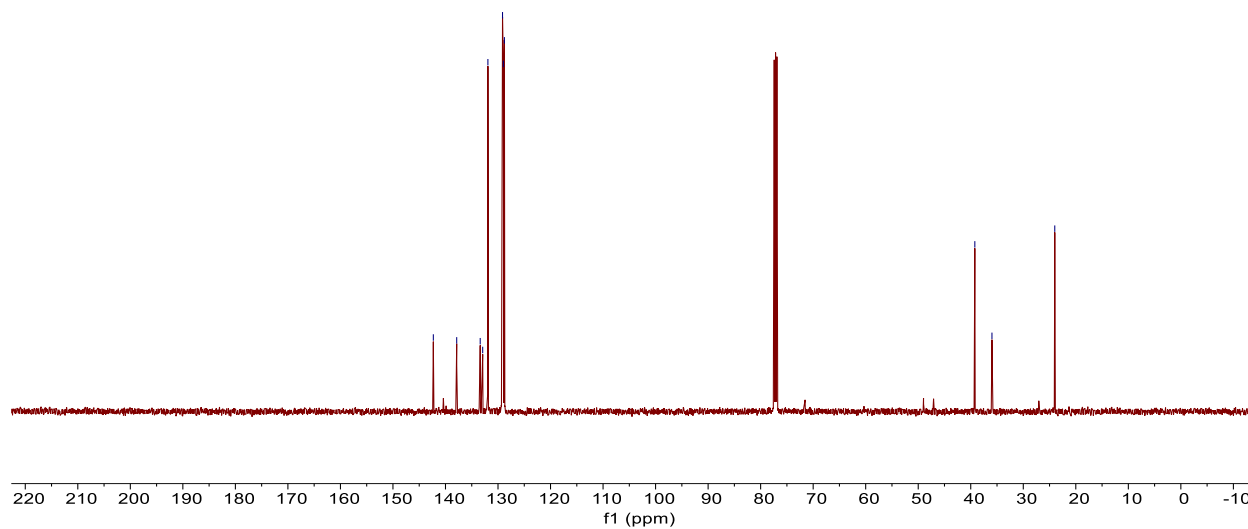



**<sup>1</sup>H NMR of 16 (500 MHz, CDCl<sub>3</sub>)**

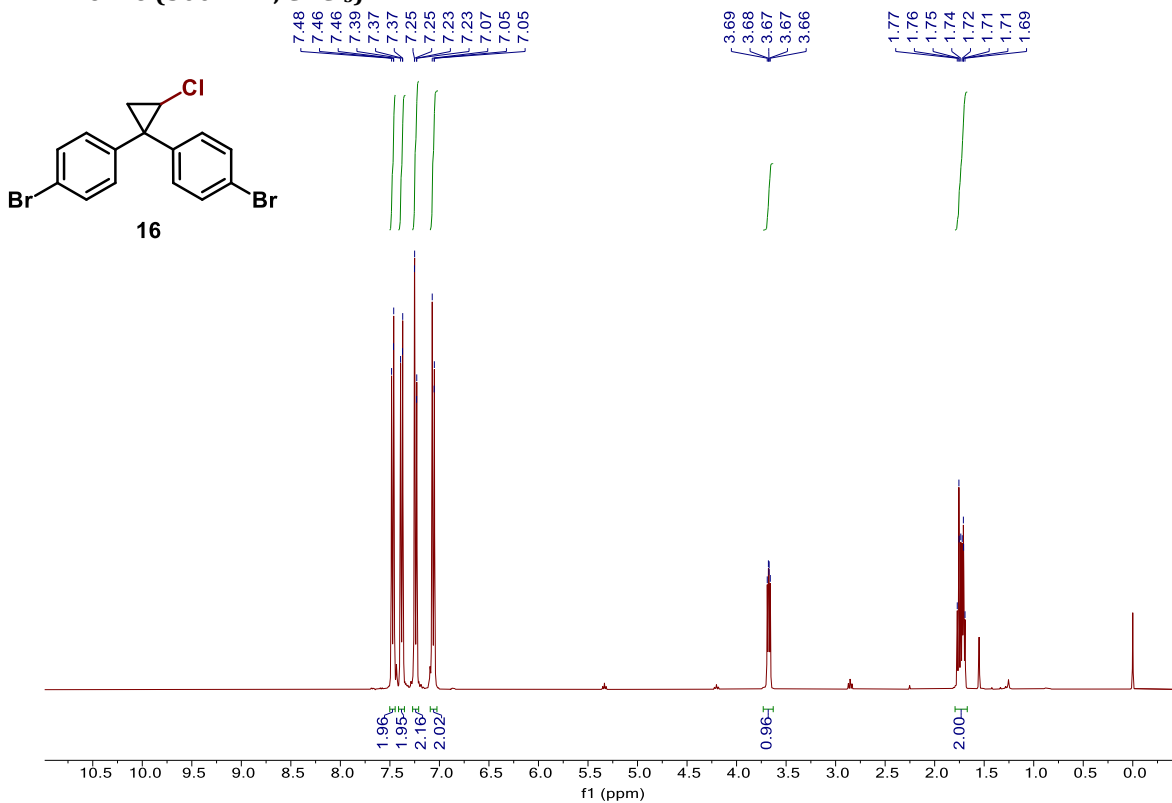

**<sup>13</sup>C NMR of 16 (126 MHz, CDCl<sub>3</sub>)**

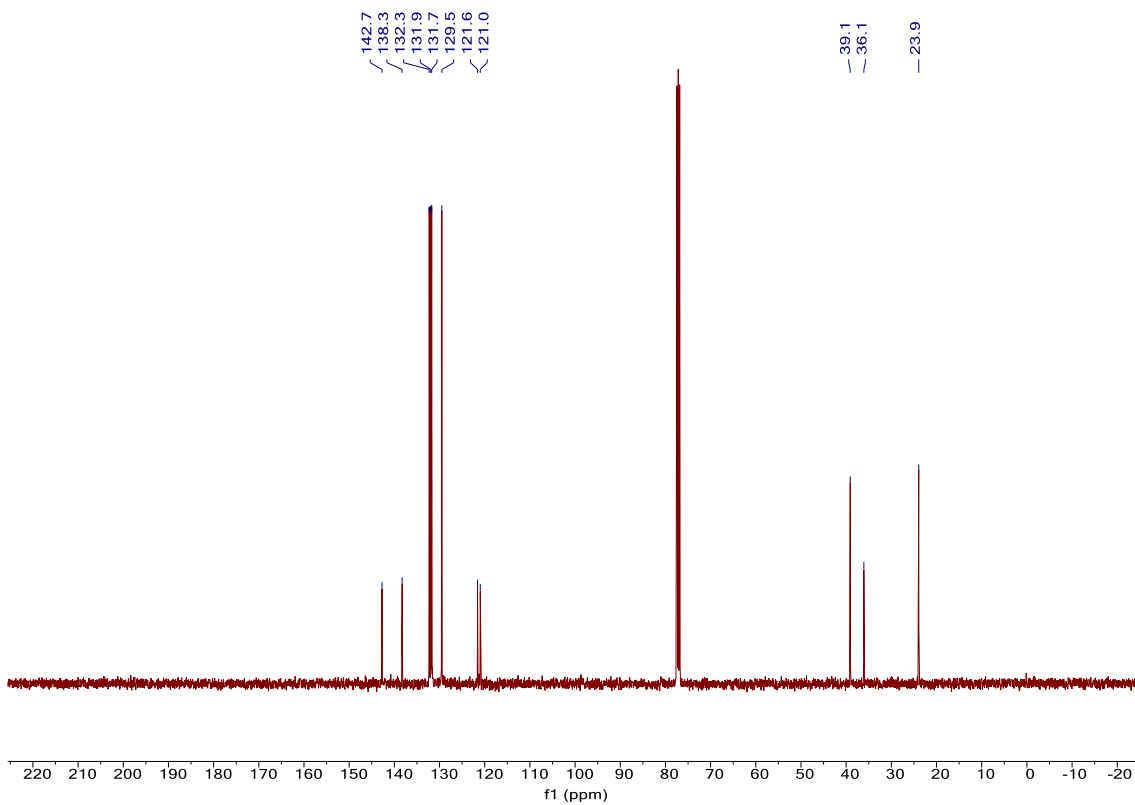

**<sup>1</sup>H NMR of 17 (500 MHz, CDCl<sub>3</sub>)**

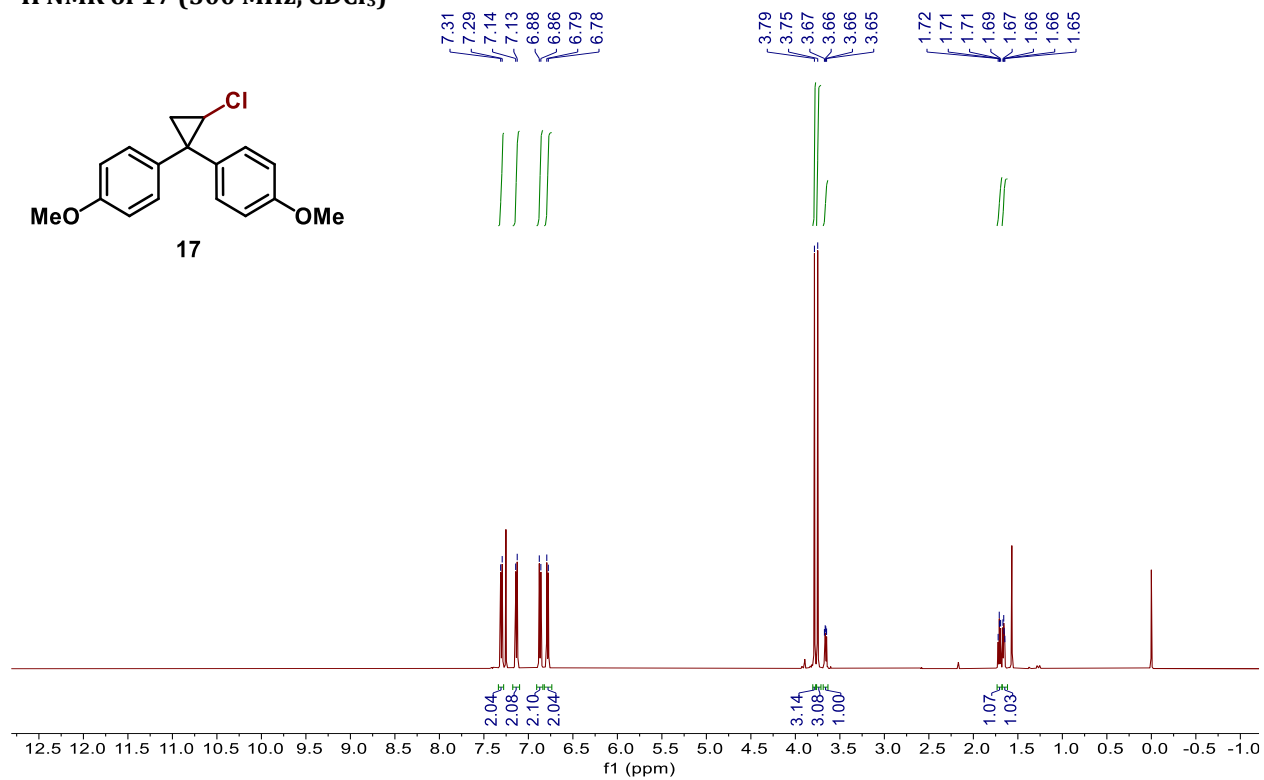

**<sup>13</sup>C NMR of 17 (126 MHz, CDCl<sub>3</sub>)**

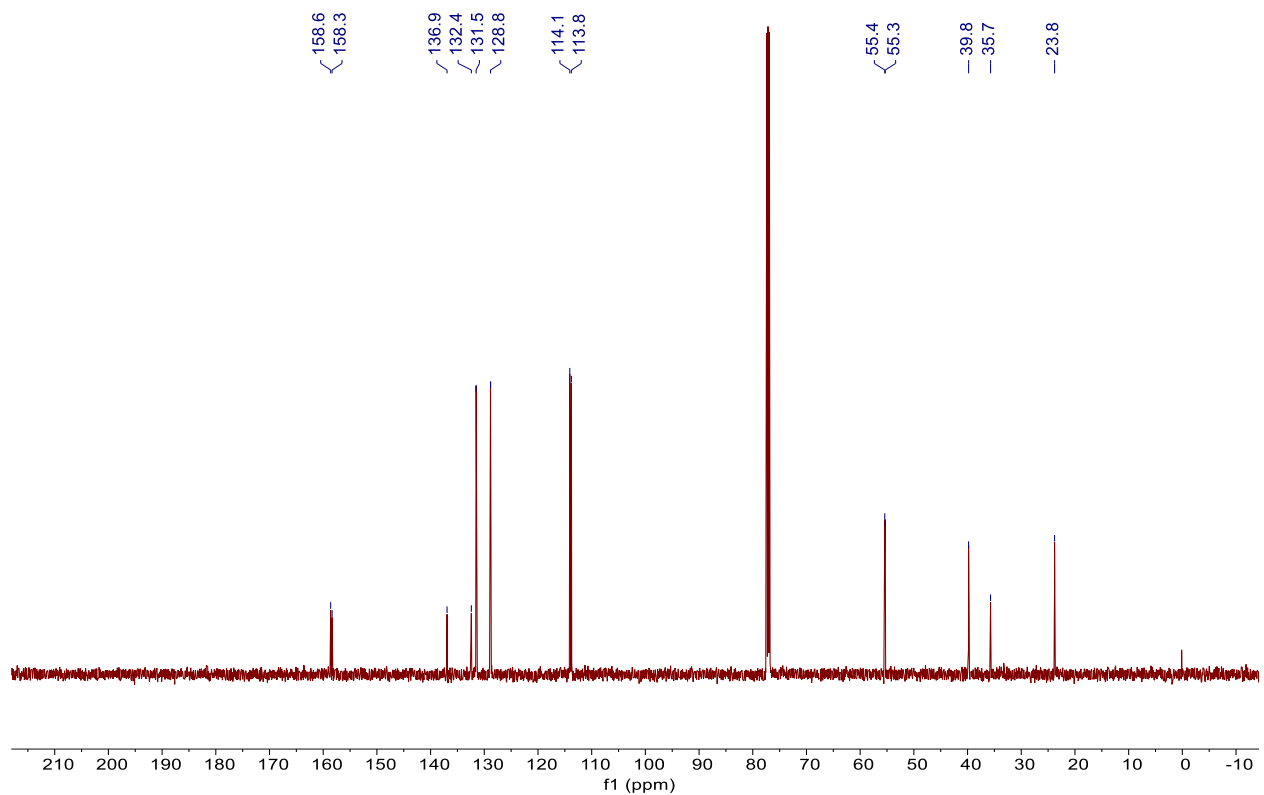

**<sup>1</sup>H NMR of 18 (400 MHz, CDCl<sub>3</sub>)**

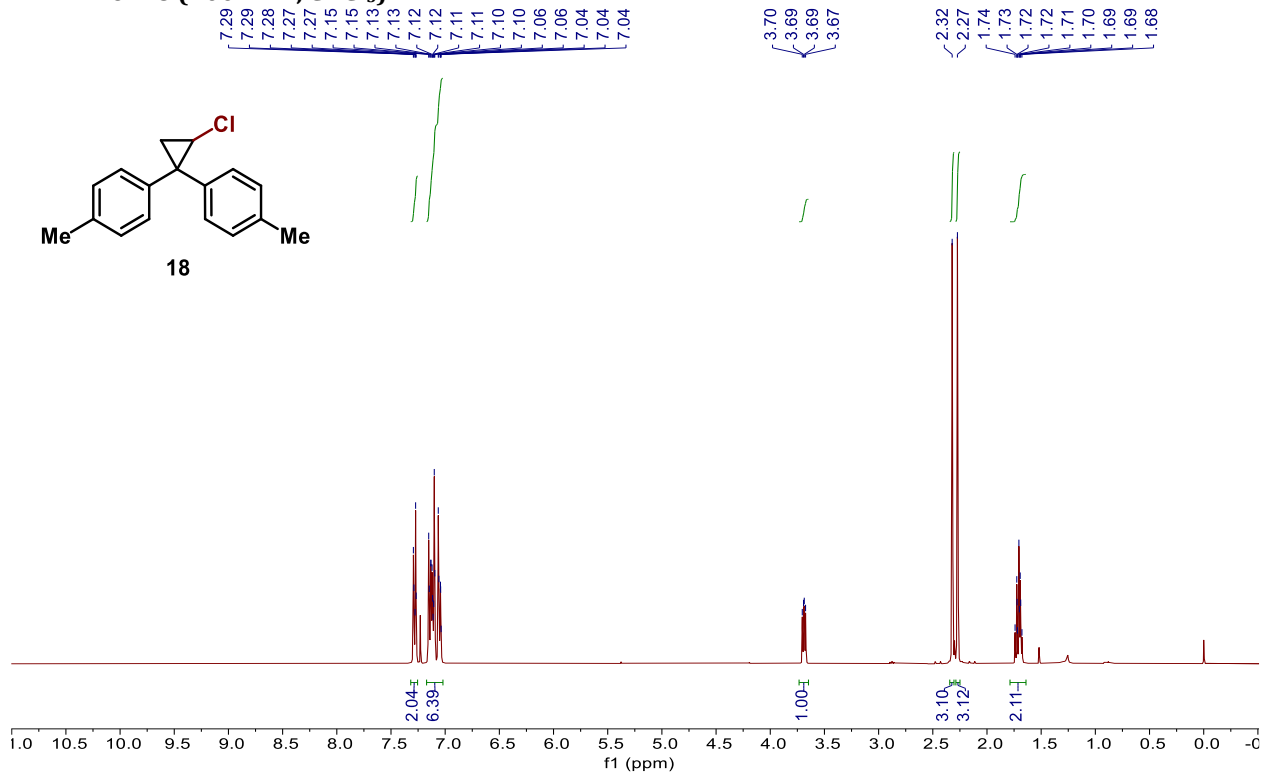

**<sup>13</sup>C NMR of 18 (101Hz, CDCl<sub>3</sub>)**

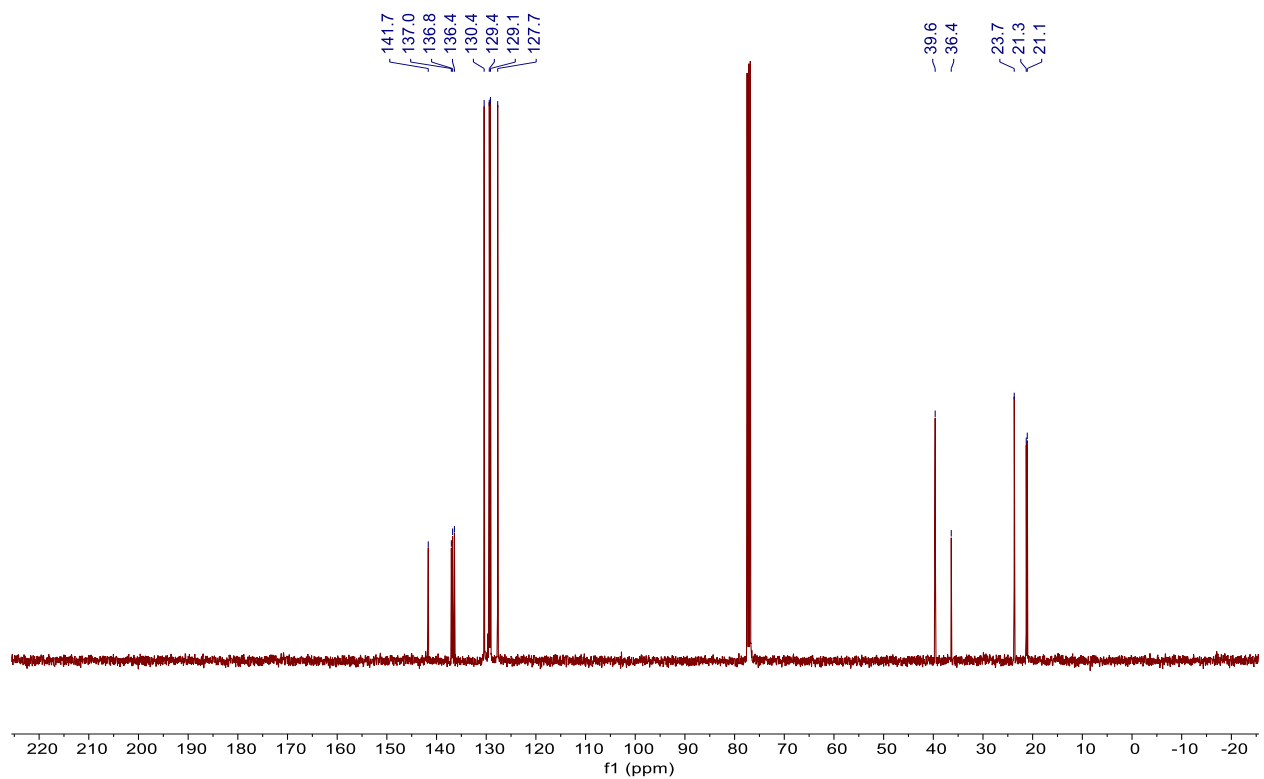

**<sup>1</sup>H NMR of 19 (500 MHz, CDCl<sub>3</sub>)**

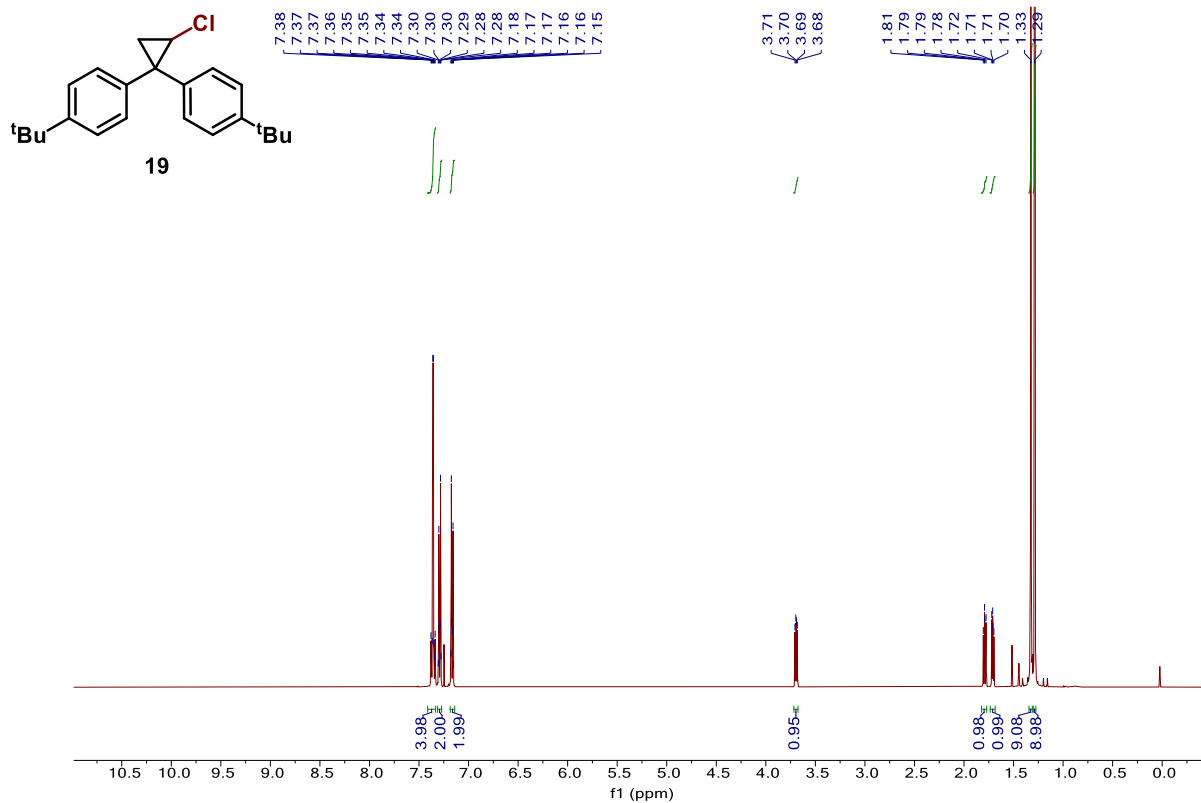

**<sup>13</sup>C NMR of 19 (126 Hz, CDCl<sub>3</sub>)**

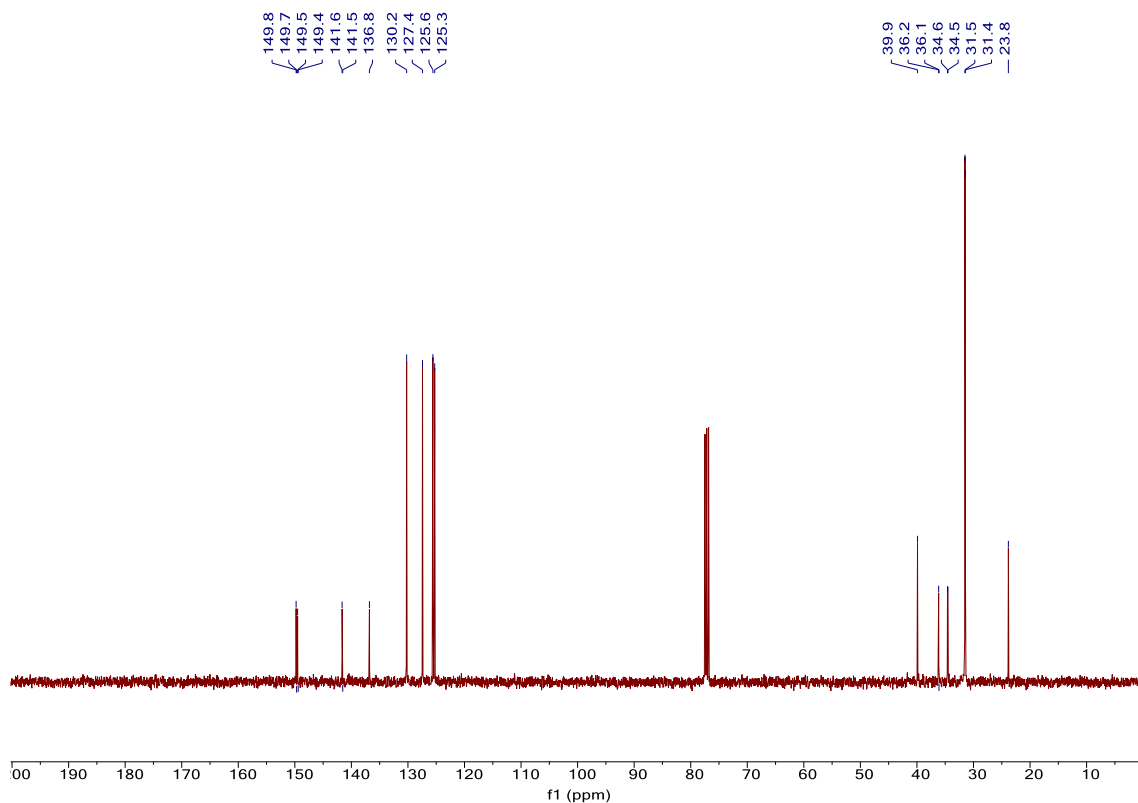

**<sup>1</sup>H NMR of 20 (500 MHz, CDCl<sub>3</sub>)**

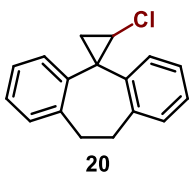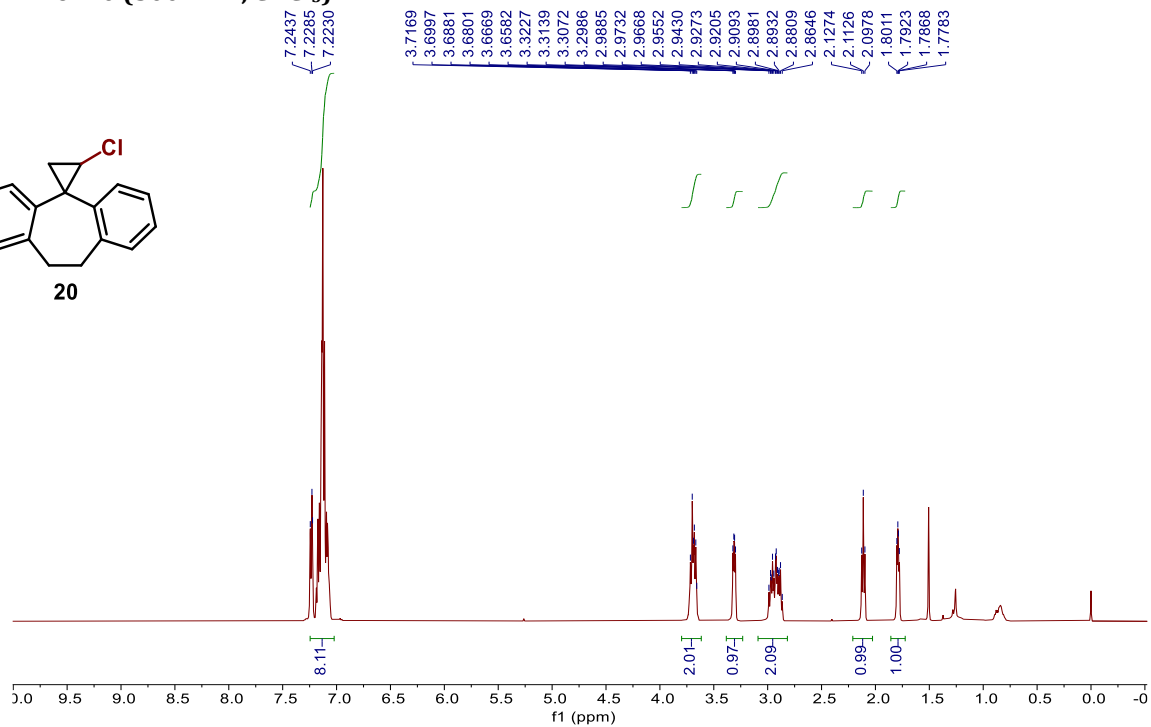

**<sup>13</sup>C NMR of 20 of (126 Hz, CDCl<sub>3</sub>)**

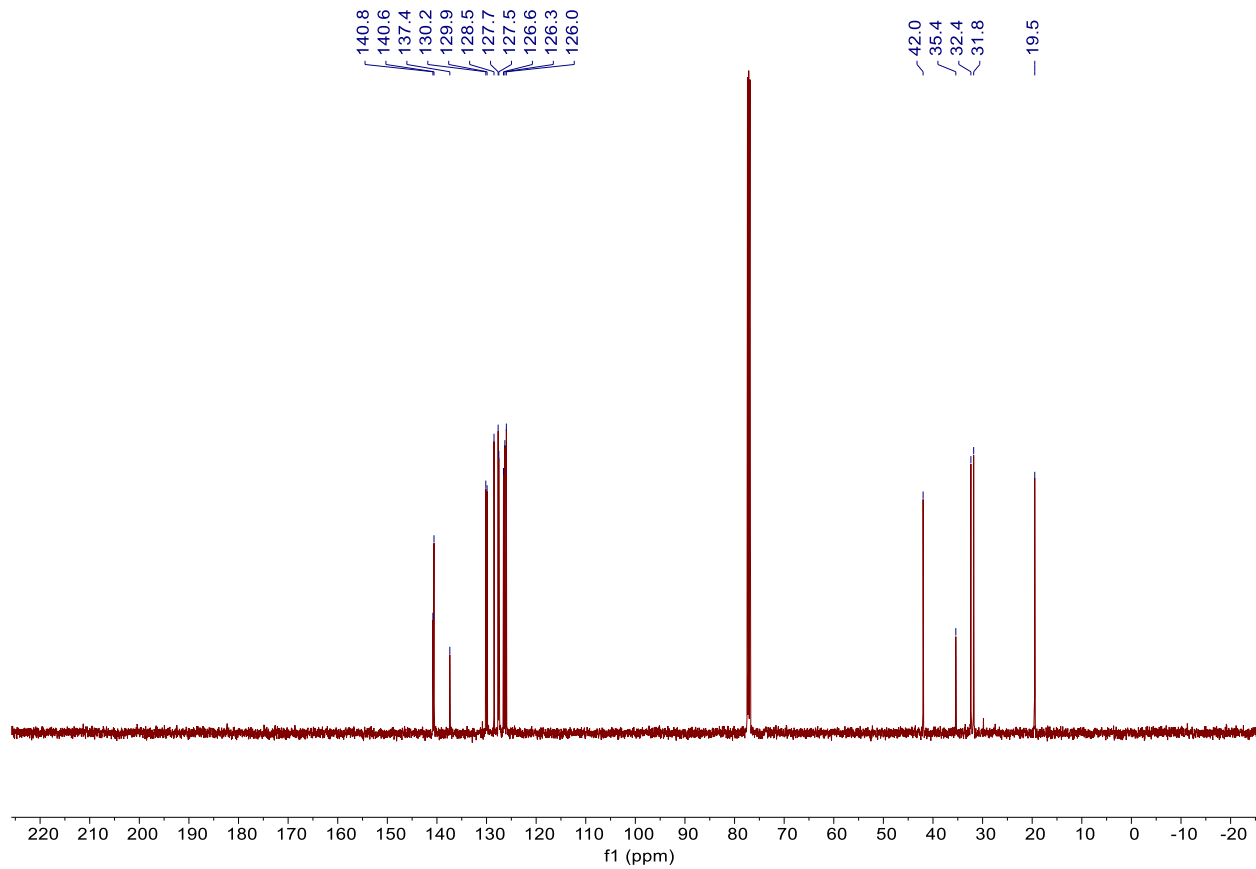

**<sup>1</sup>H NMR of 21 (400 MHz, CDCl<sub>3</sub>)**

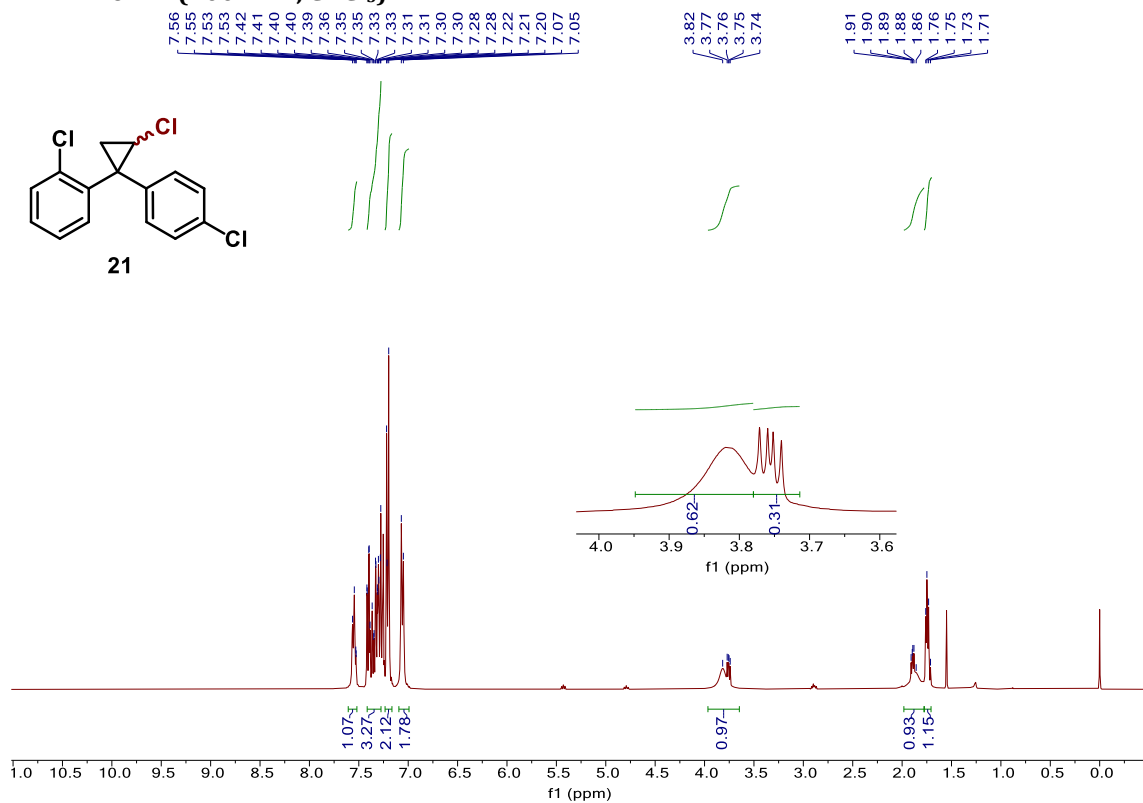

**<sup>13</sup>C NMR of 21 (126 Hz, CDCl<sub>3</sub>)**

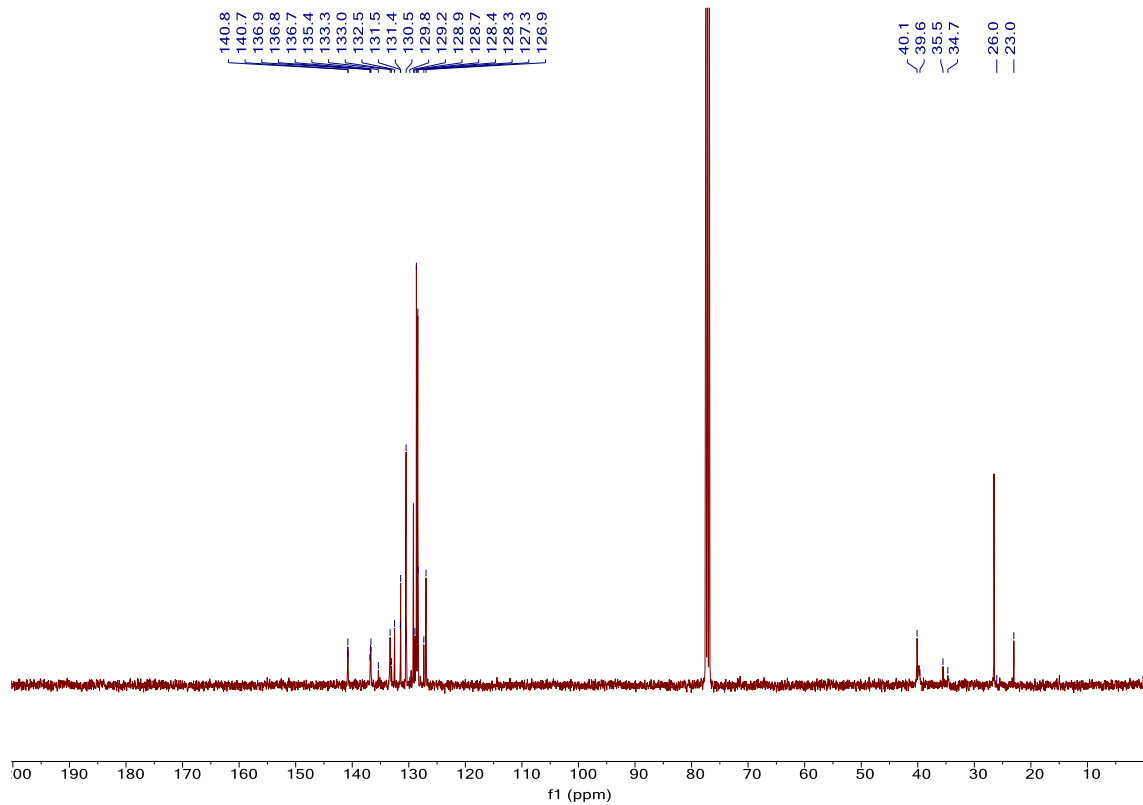

### <sup>1</sup>H NMR of 22 (500 MHz, CDCl<sub>3</sub>)

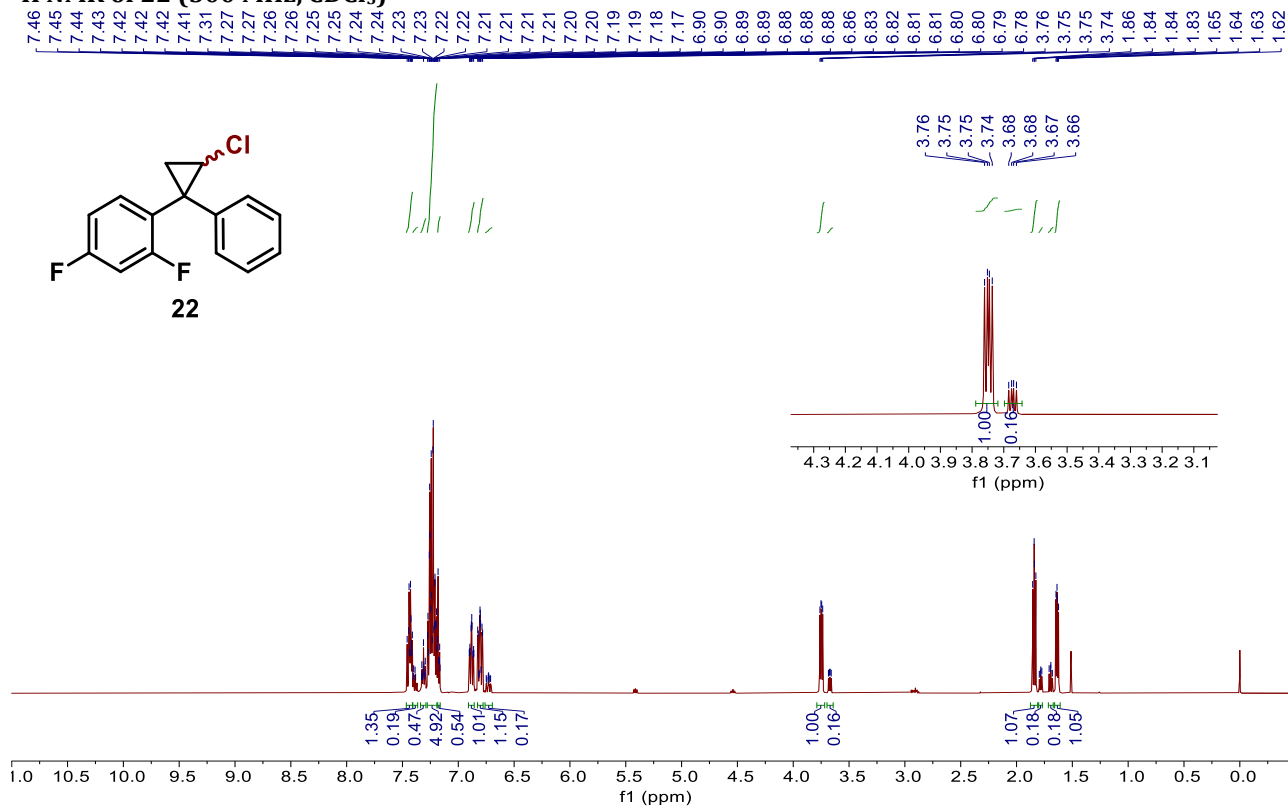

### <sup>13</sup>C NMR of 22 (126 Hz, CDCl<sub>3</sub>)

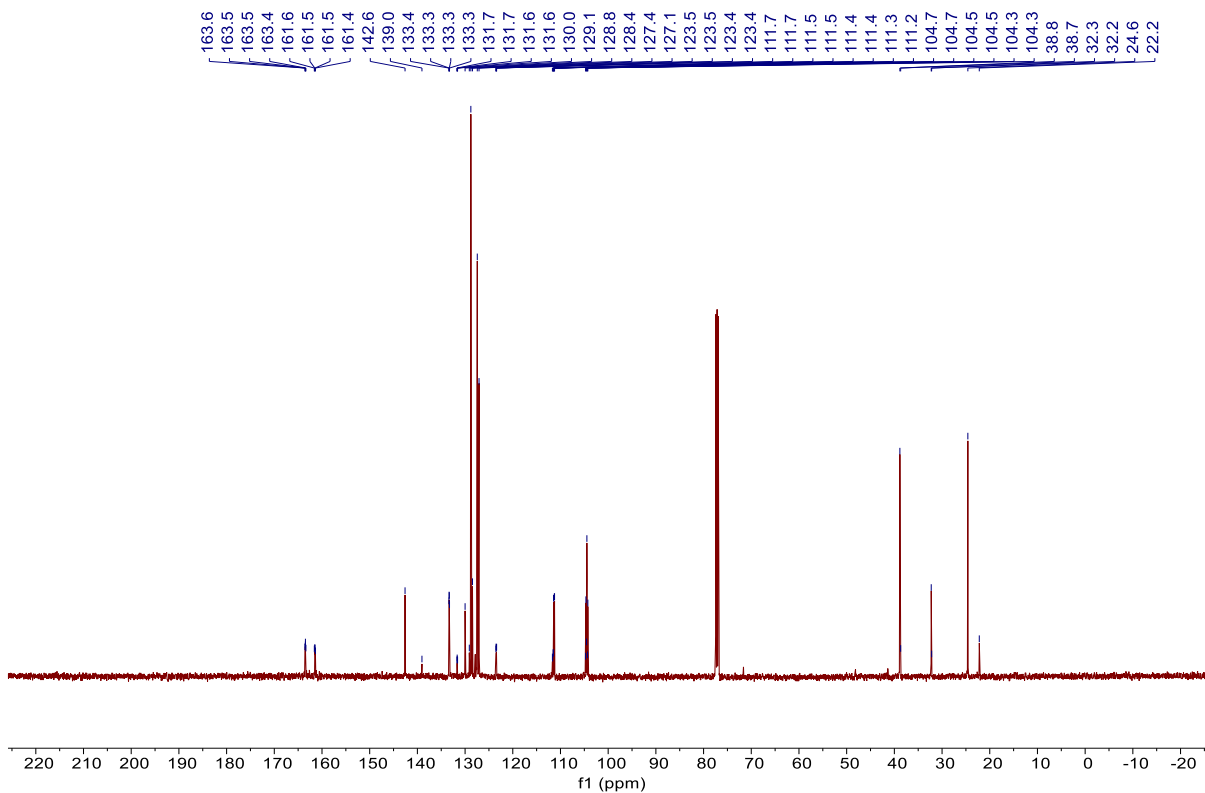

**$^{19}\text{F}$  NMR of 22 (471 Hz,  $\text{CDCl}_3$ )**

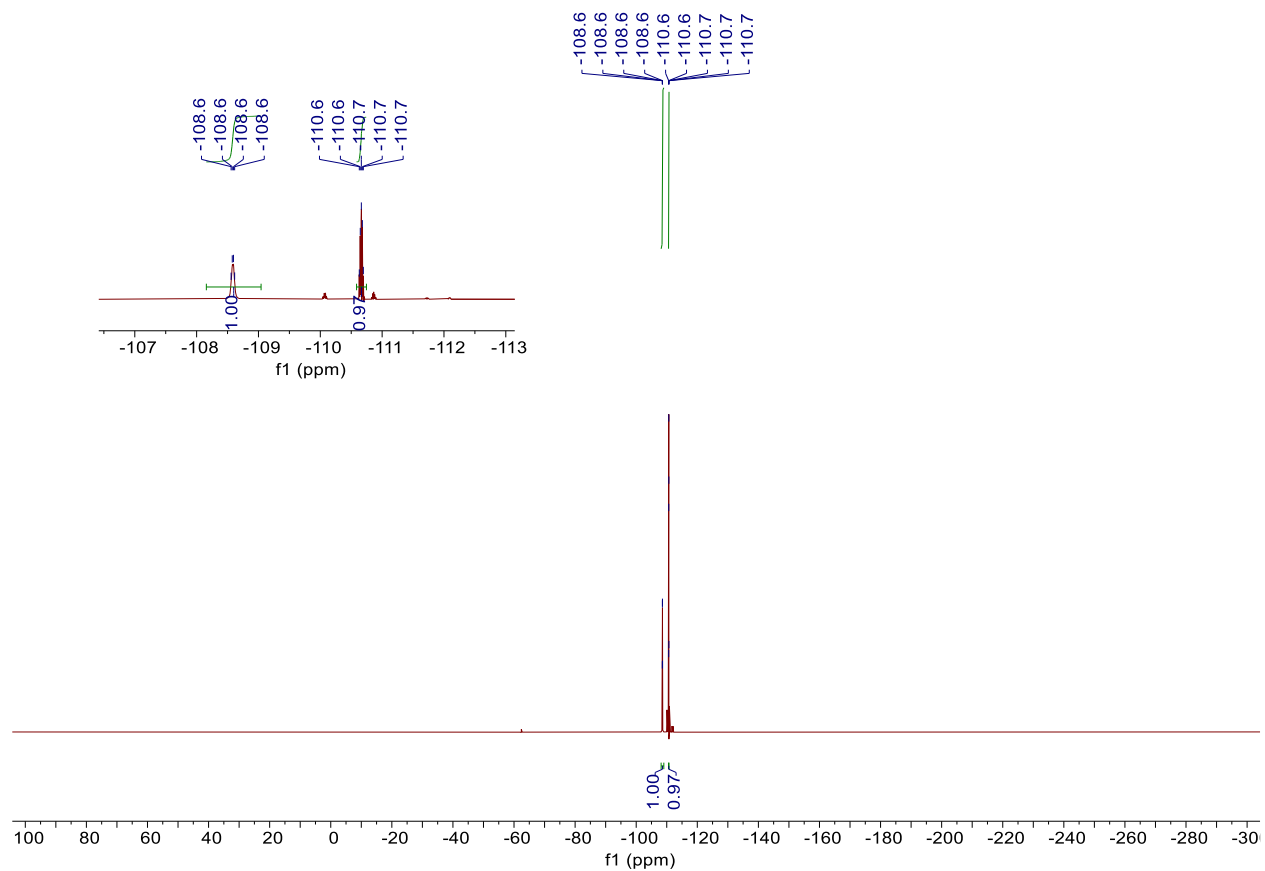



**<sup>1</sup>H NMR of 23 (500 MHz, CDCl<sub>3</sub>)**

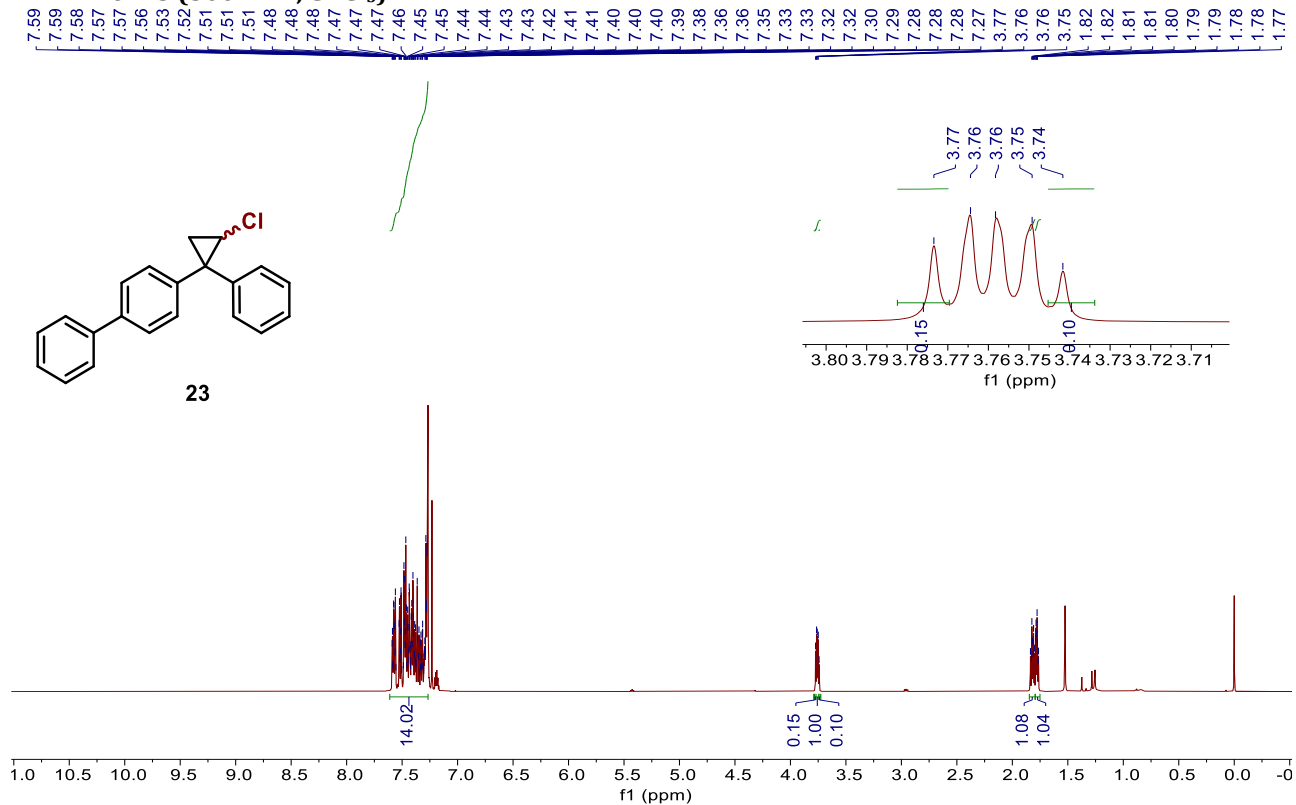

**<sup>13</sup>C NMR of 23 (126 Hz, CDCl<sub>3</sub>)**

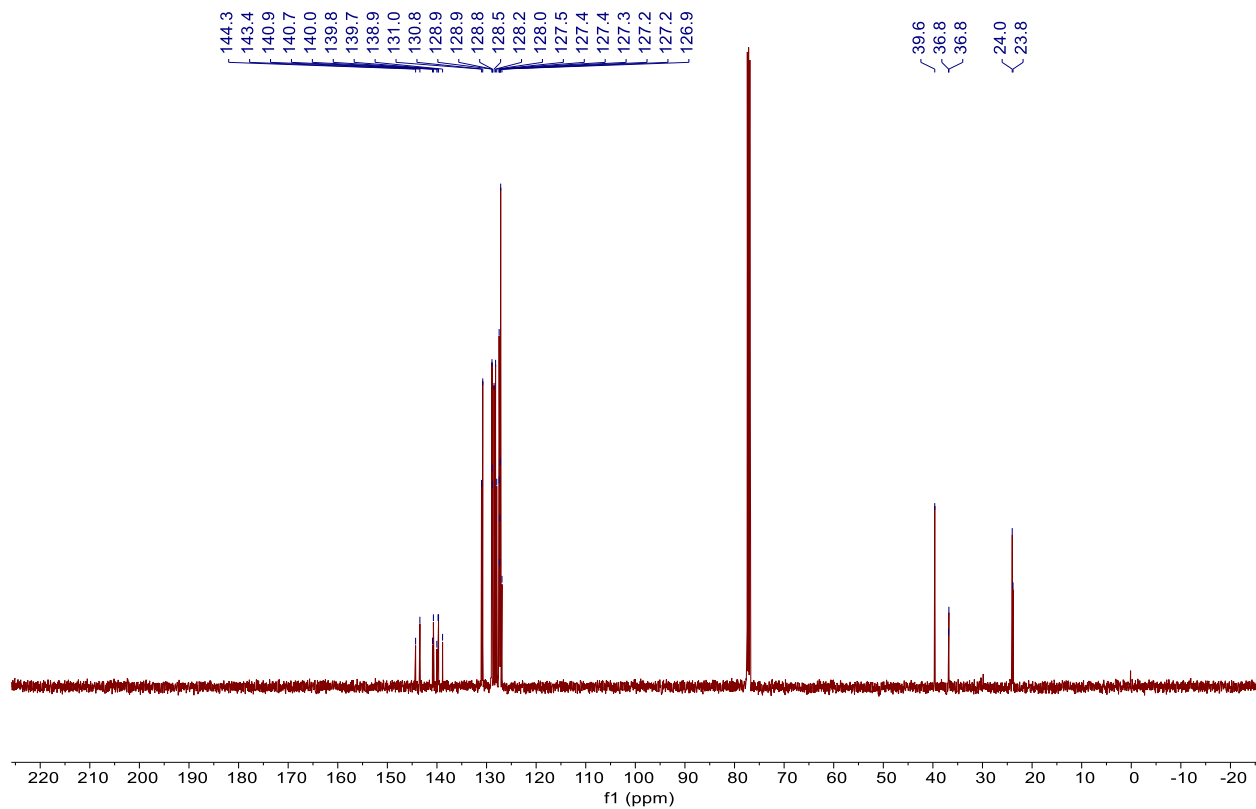



**$^{19}\text{F}$  NMR of 24 (471 Hz,  $\text{CDCl}_3$ )**

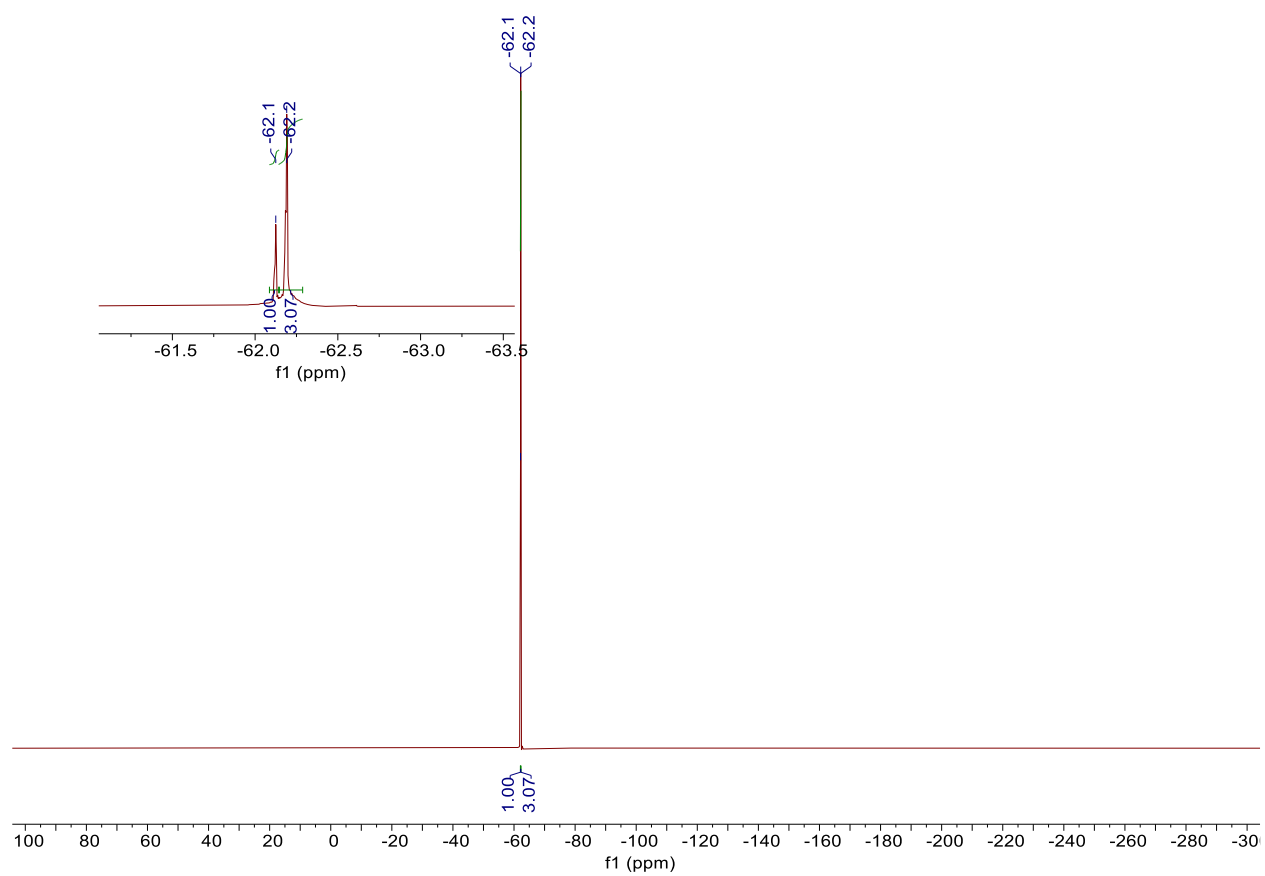

**<sup>1</sup>H NMR of 25 (400 MHz, CDCl<sub>3</sub>)**

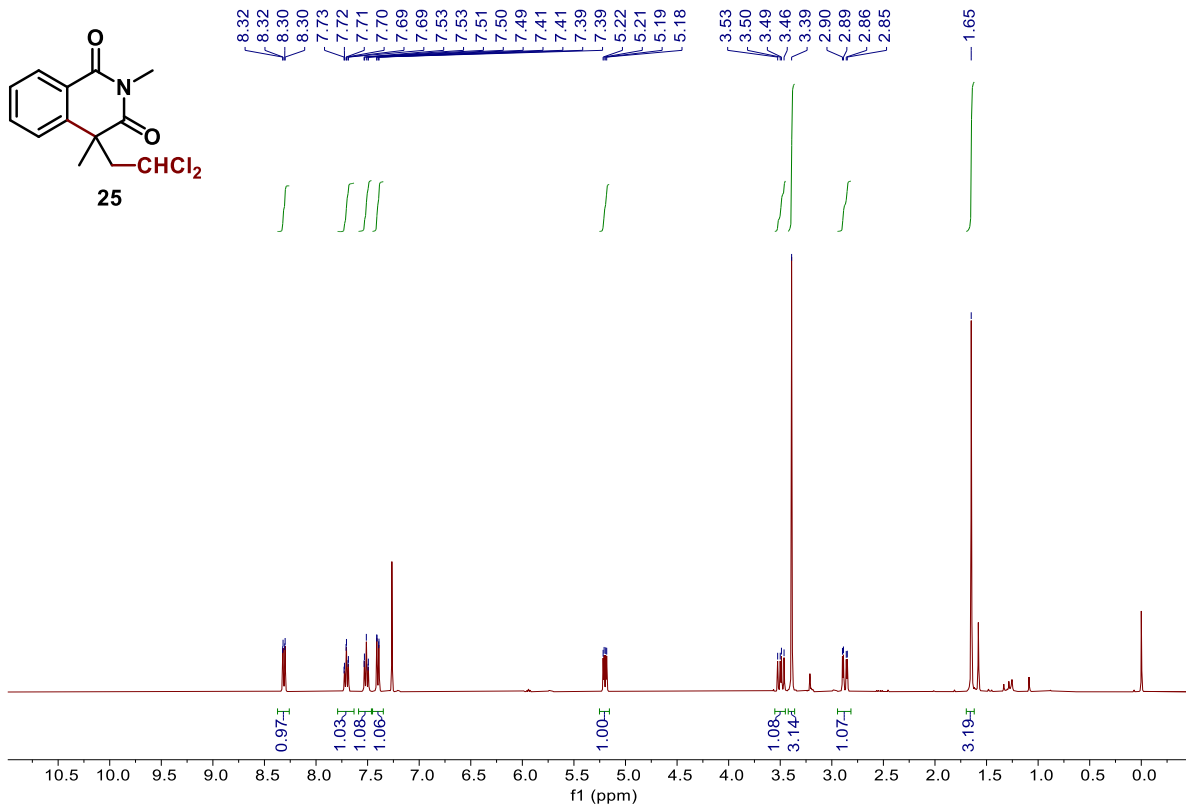

**<sup>13</sup>C NMR of 25 (101 MHz, CDCl<sub>3</sub>)**

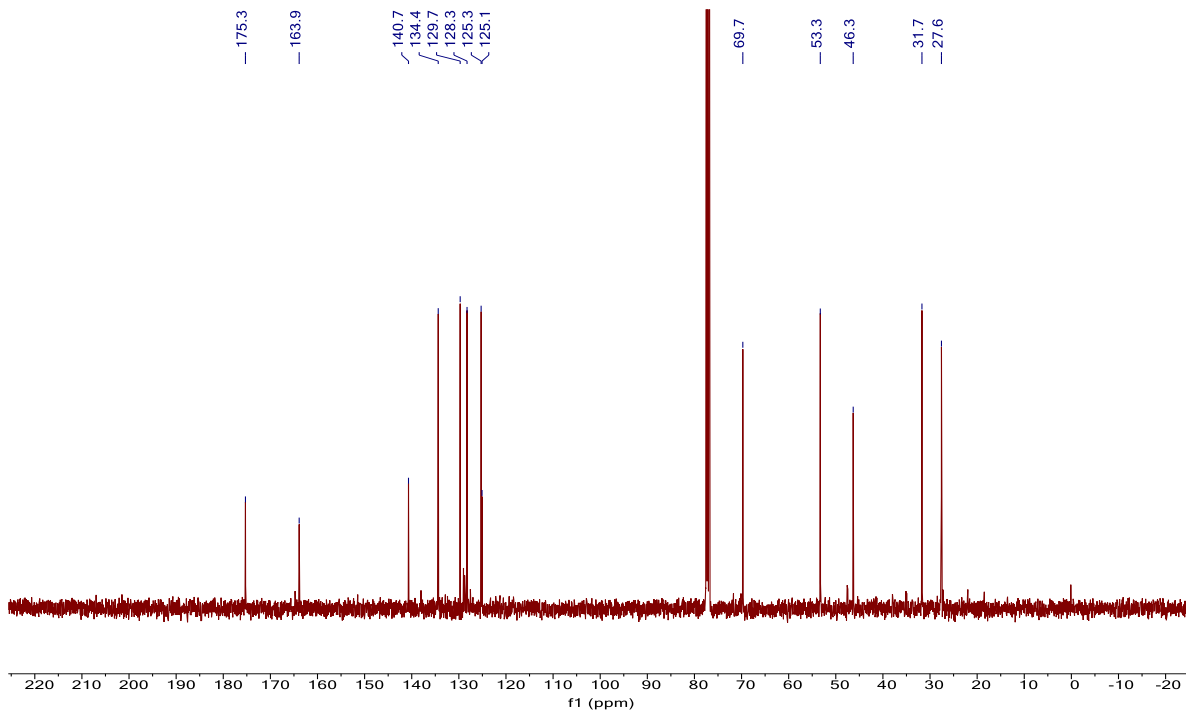

**<sup>1</sup>H NMR of 26 (500 MHz, CDCl<sub>3</sub>)**

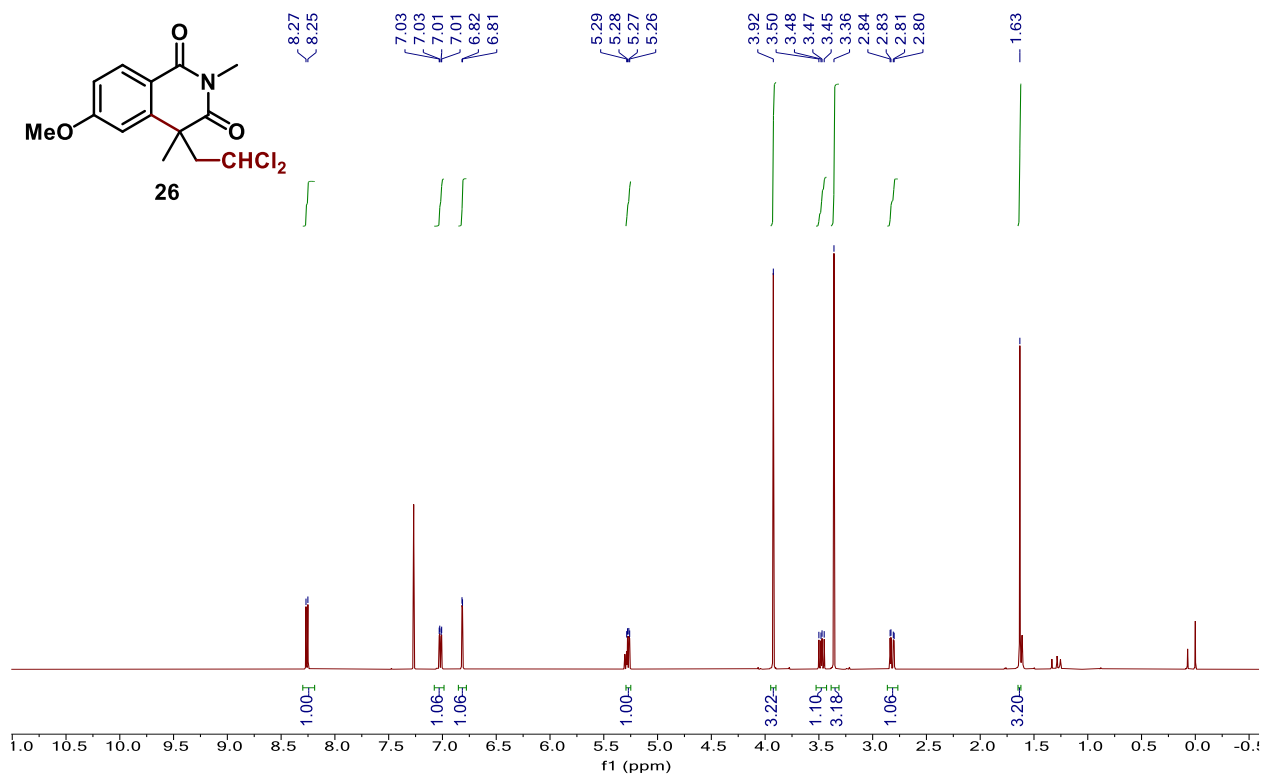

**<sup>13</sup>C NMR of 26 (126 MHz, CDCl<sub>3</sub>)**

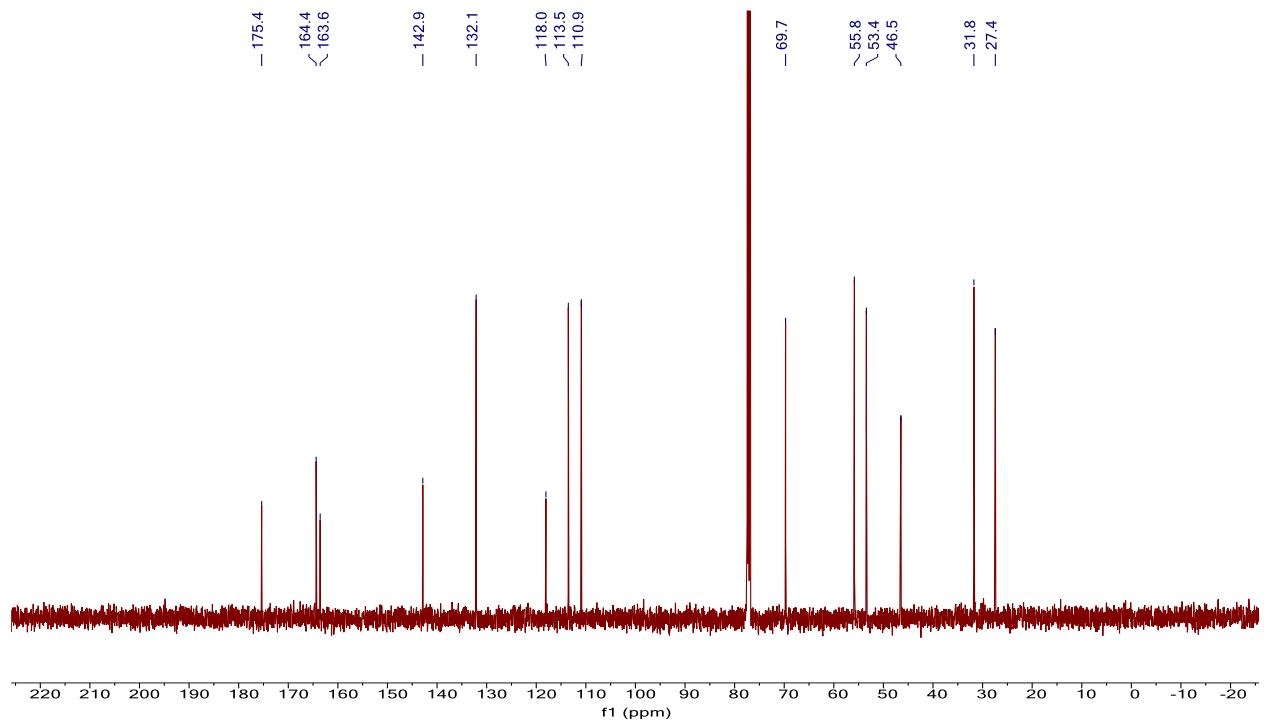

**<sup>1</sup>H NMR of 27 (400 MHz, CDCl<sub>3</sub>)**

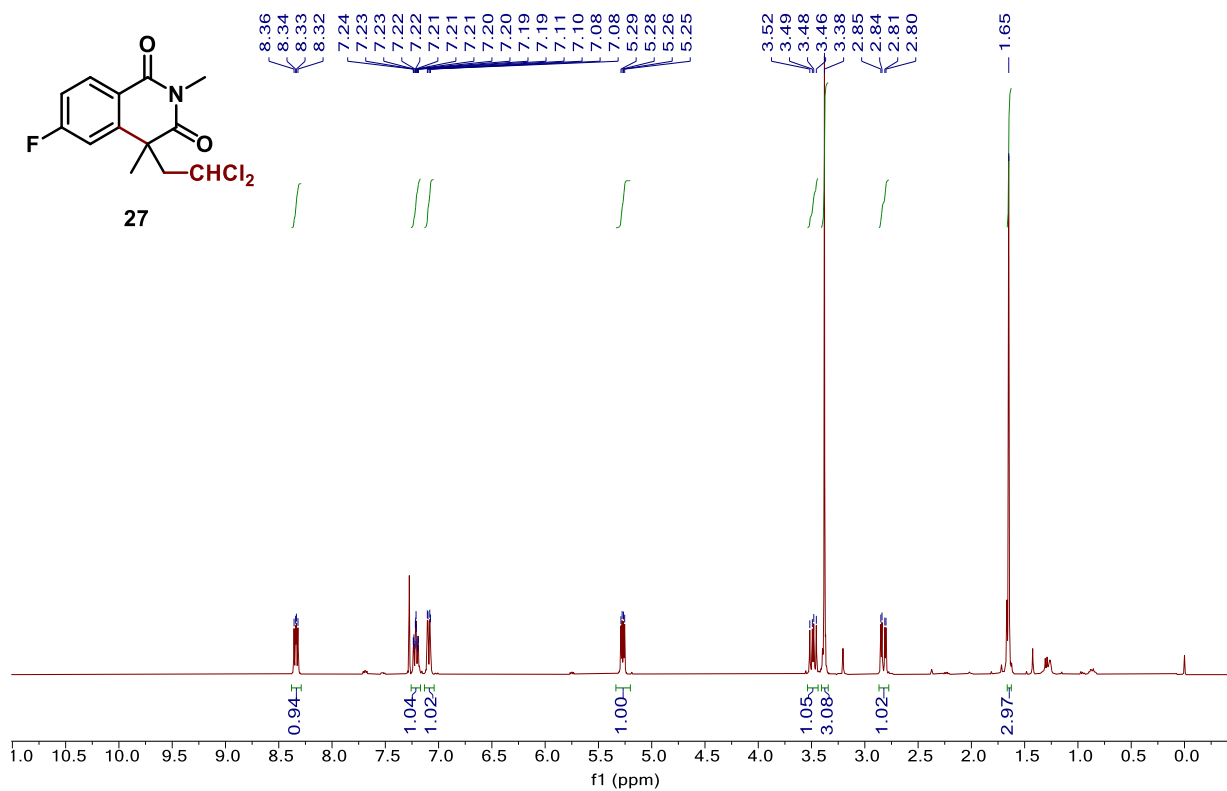

**<sup>13</sup>C NMR of 27 (101 MHz, CDCl<sub>3</sub>)**

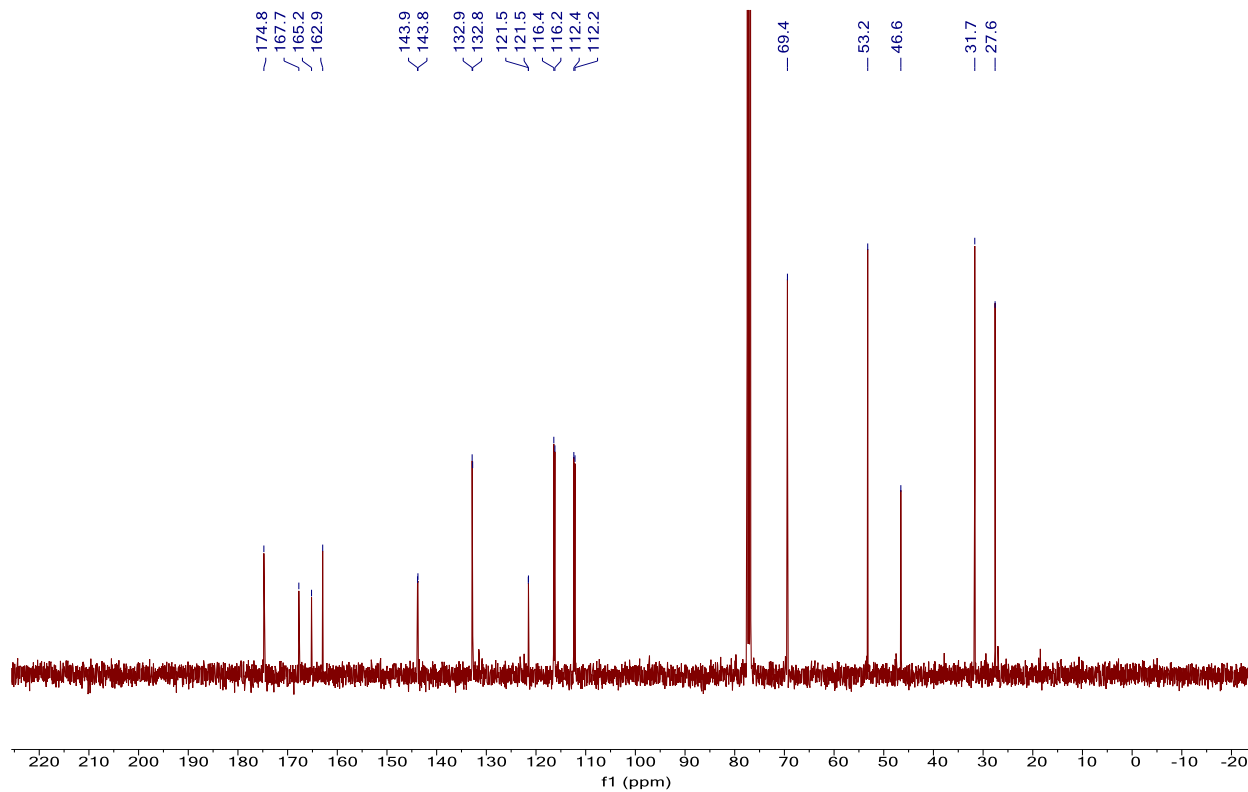

**$^{19}\text{F}$  NMR of 27 (376 MHz,  $\text{CDCl}_3$ )**

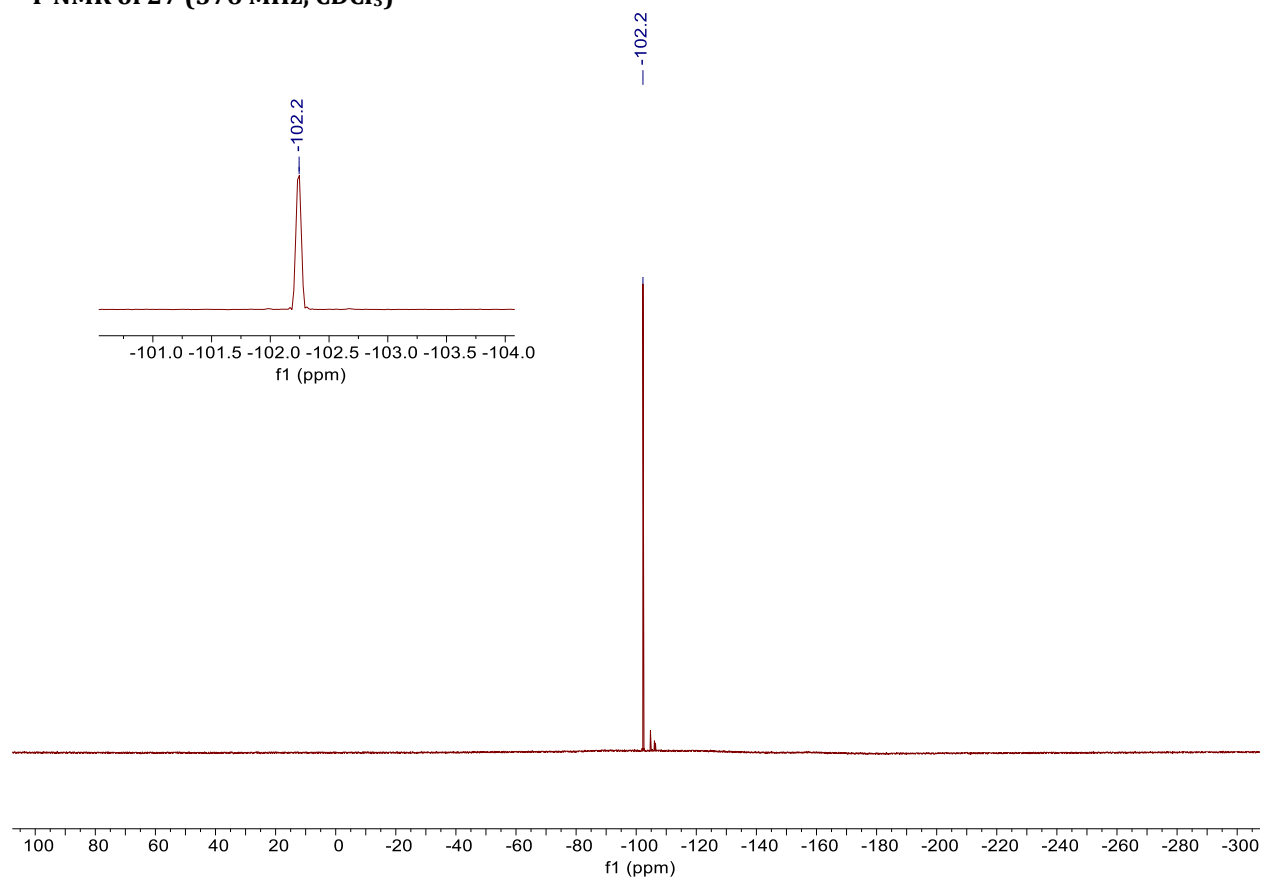

**<sup>1</sup>H NMR of 28 (500 MHz, CDCl<sub>3</sub>)**

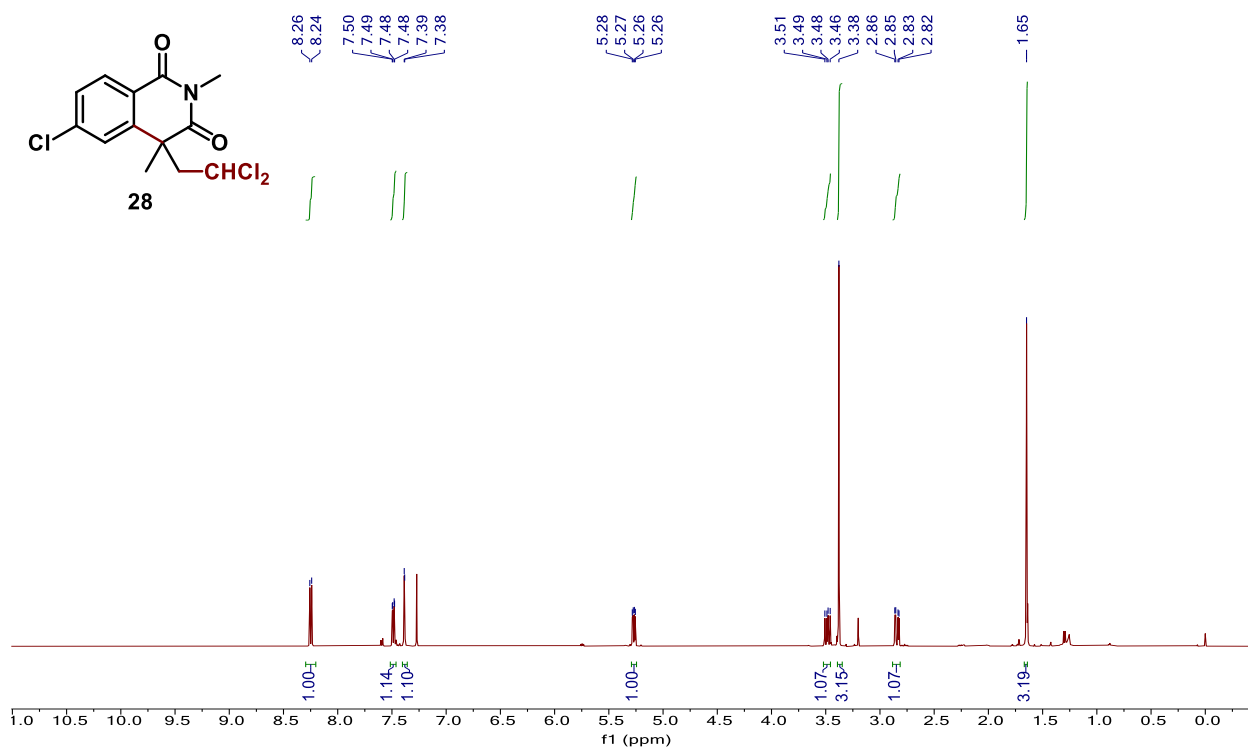

**<sup>13</sup>C NMR of 28 (101 MHz, CDCl<sub>3</sub>)**

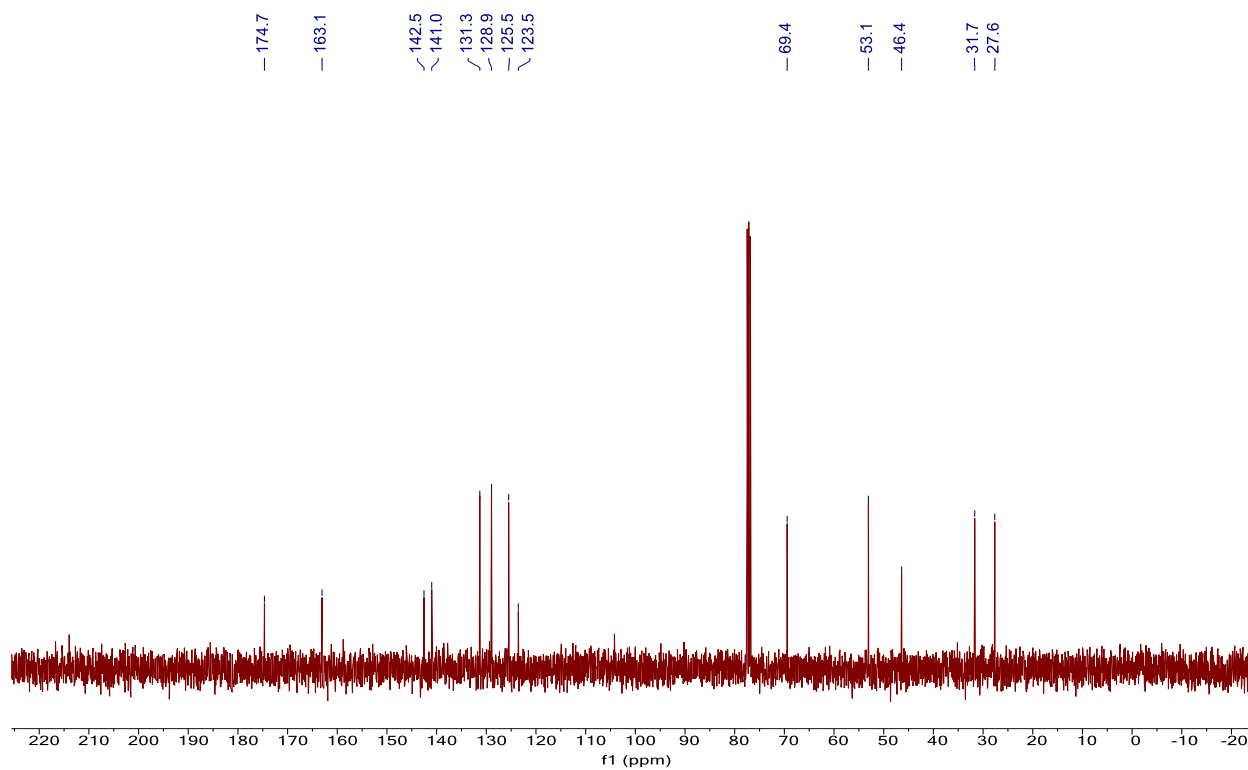



**<sup>1</sup>H NMR of 29 (500 MHz, CDCl<sub>3</sub>)**

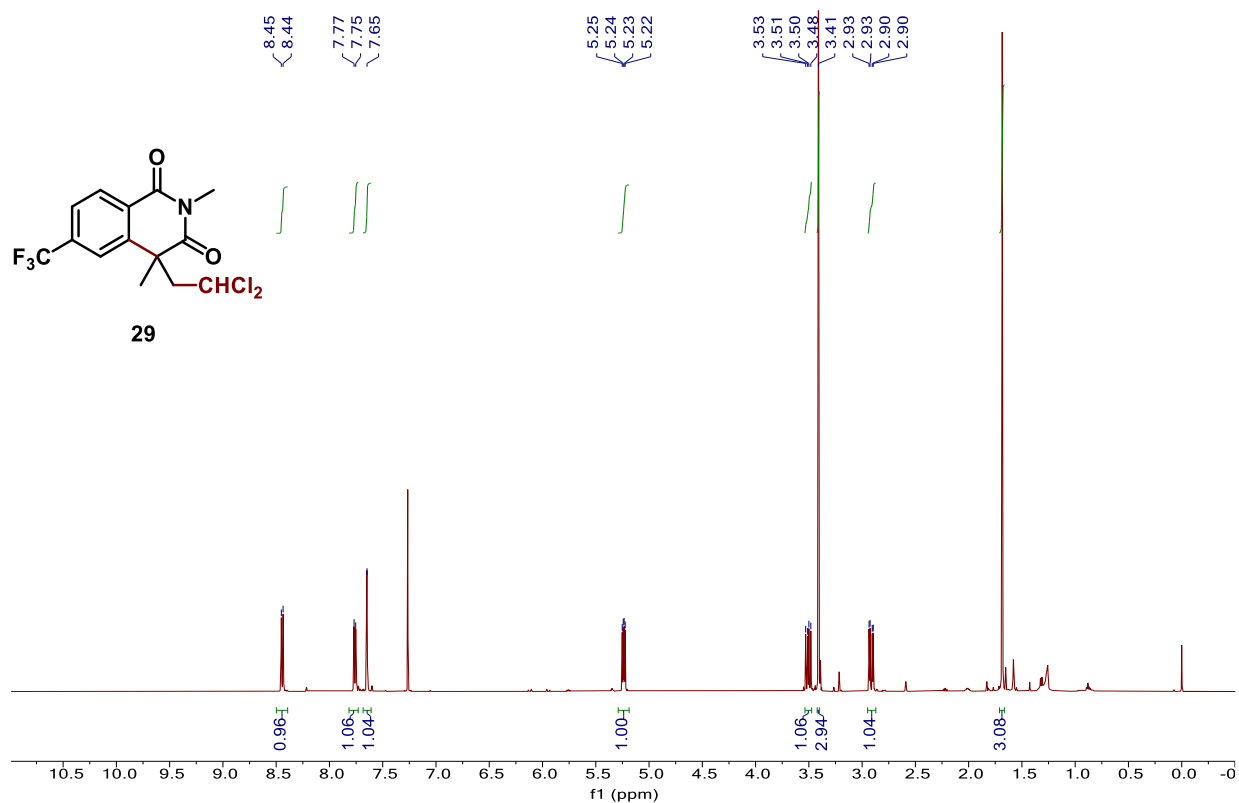

**<sup>13</sup>C NMR of 29 (126 MHz, CDCl<sub>3</sub>)**

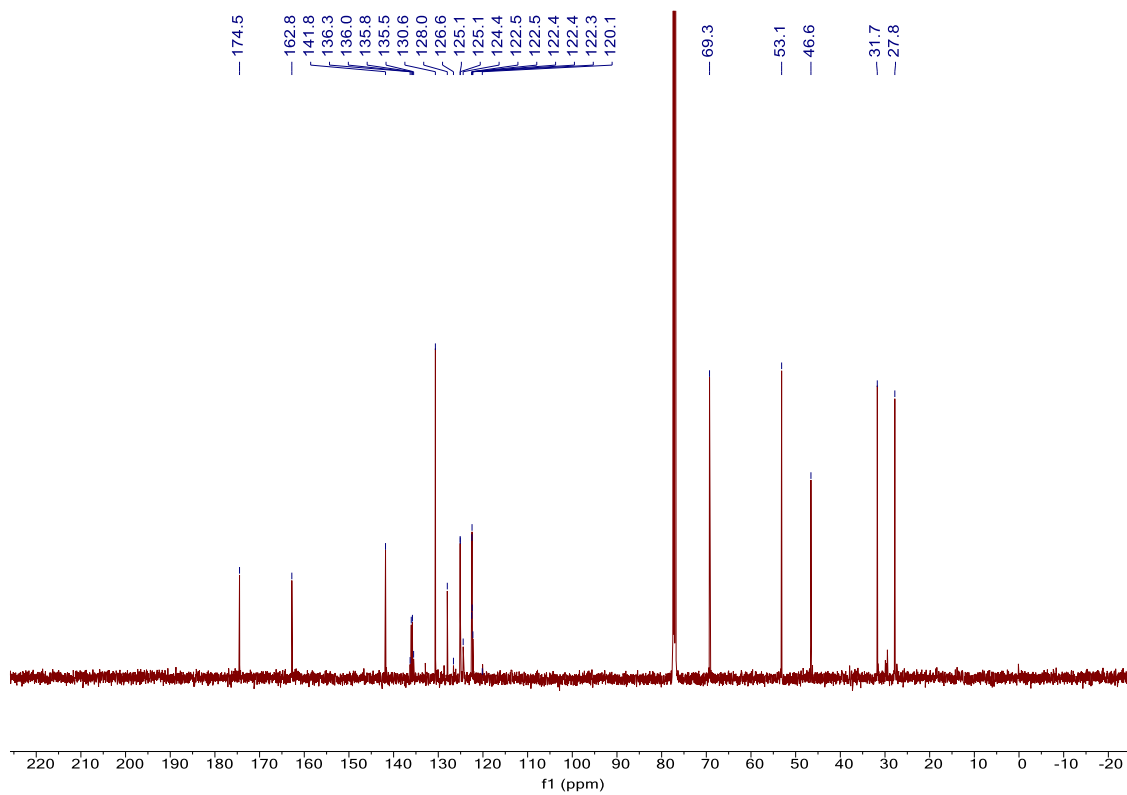

**$^{19}\text{F}$  NMR of 29 (376 MHz,  $\text{CDCl}_3$ )**

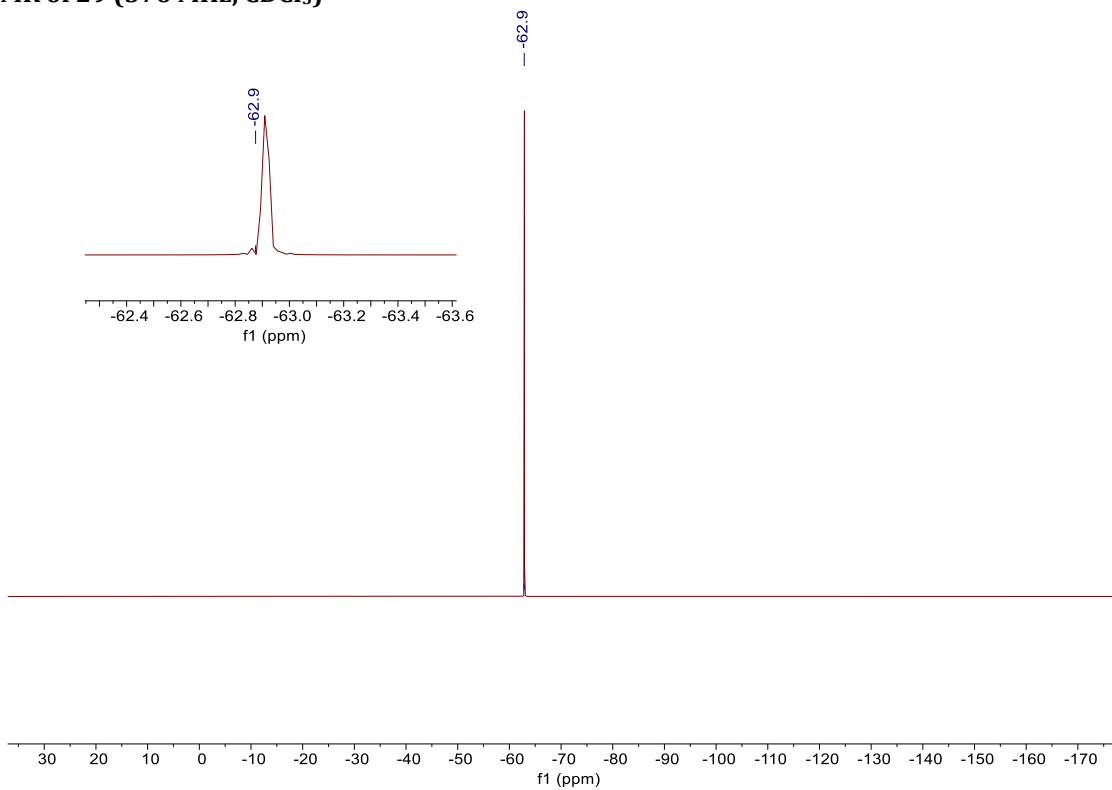

**<sup>1</sup>H NMR of 30 (500 MHz, CDCl<sub>3</sub>)**

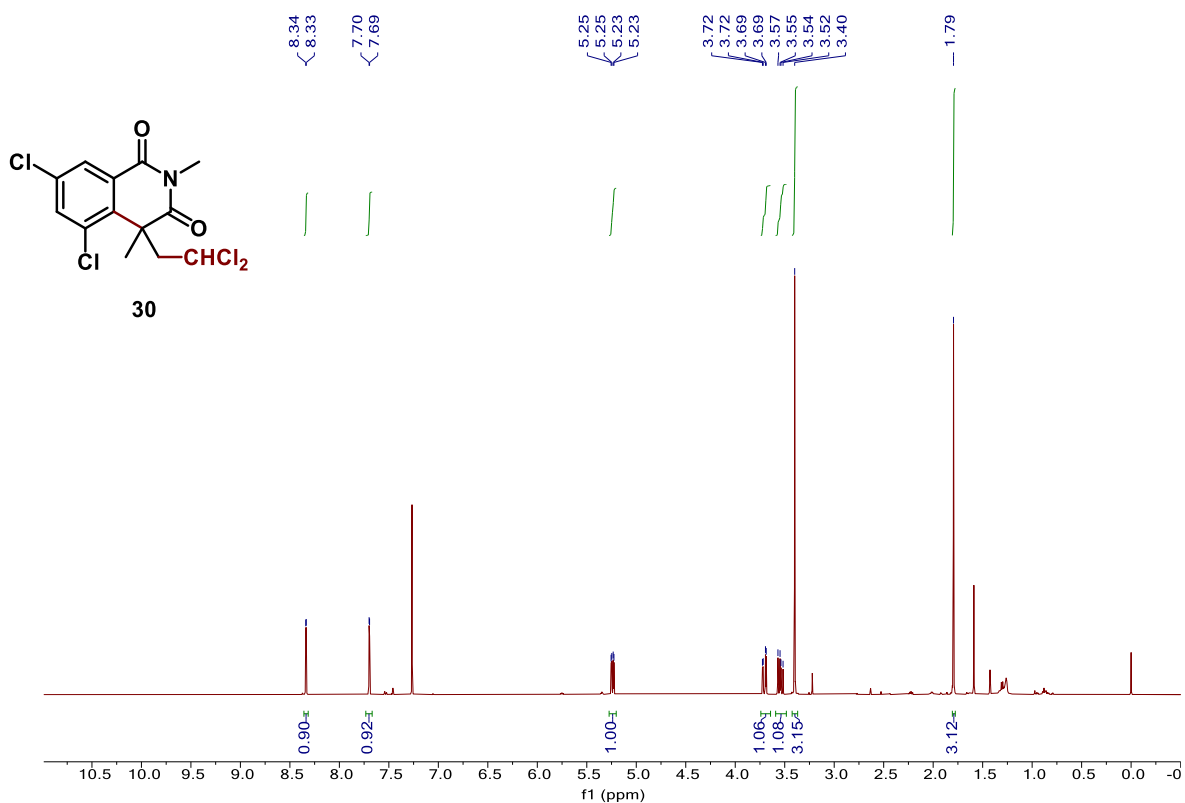

**<sup>13</sup>C NMR of 30 (126 MHz, CDCl<sub>3</sub>)**

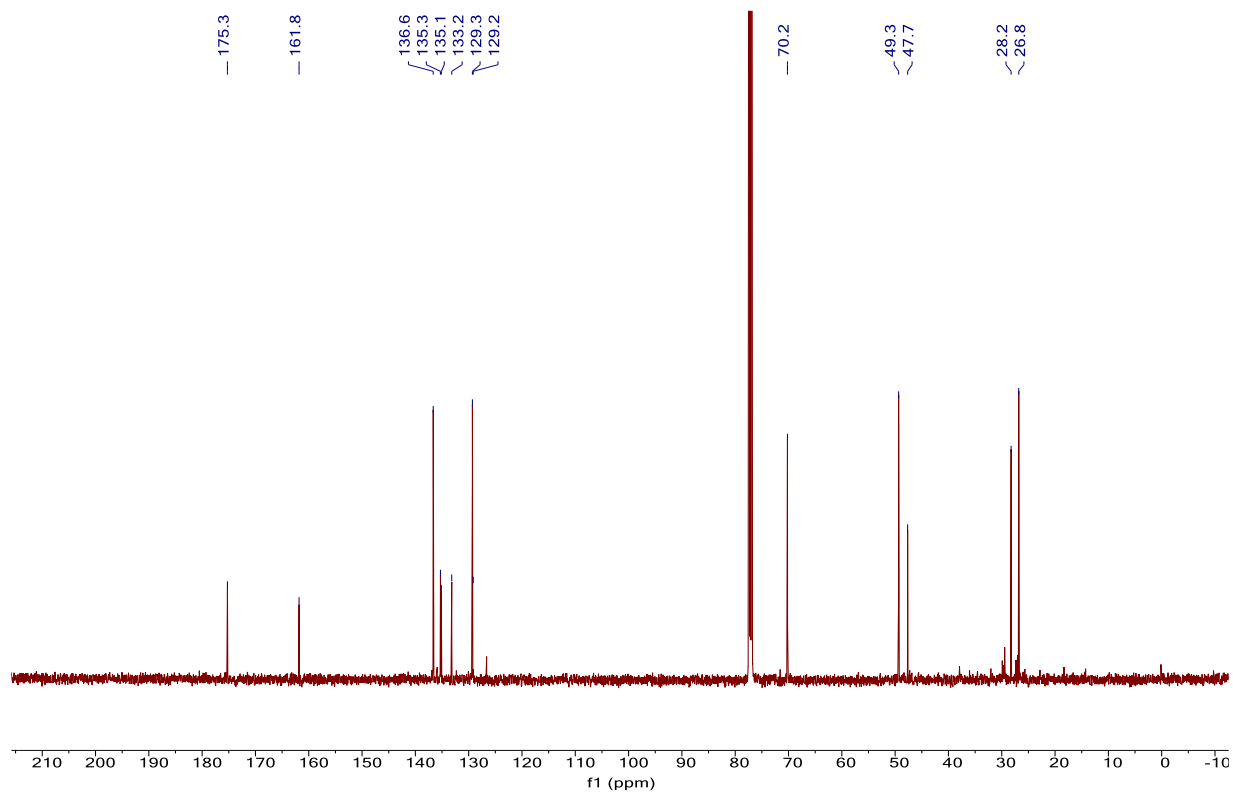

**<sup>1</sup>H NMR of 31 (400 MHz, CDCl<sub>3</sub>)**

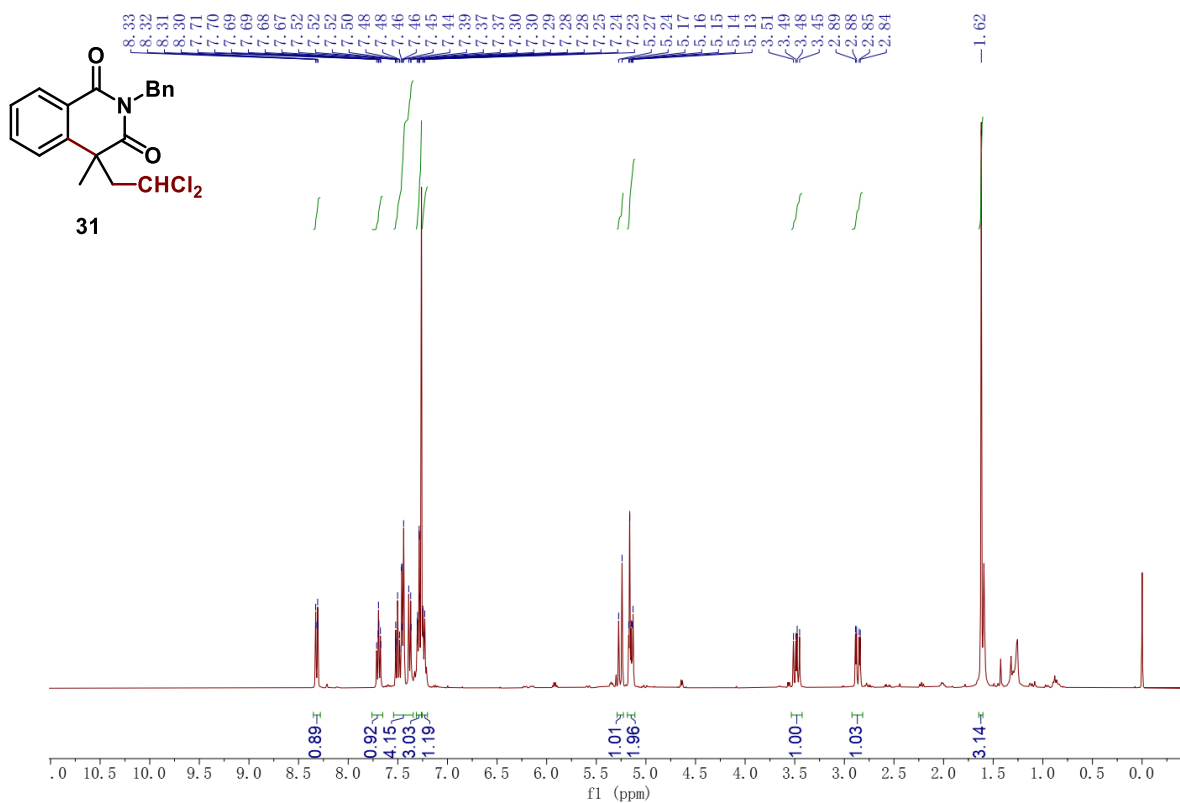

**<sup>13</sup>C NMR of 31 (101 MHz, CDCl<sub>3</sub>)**

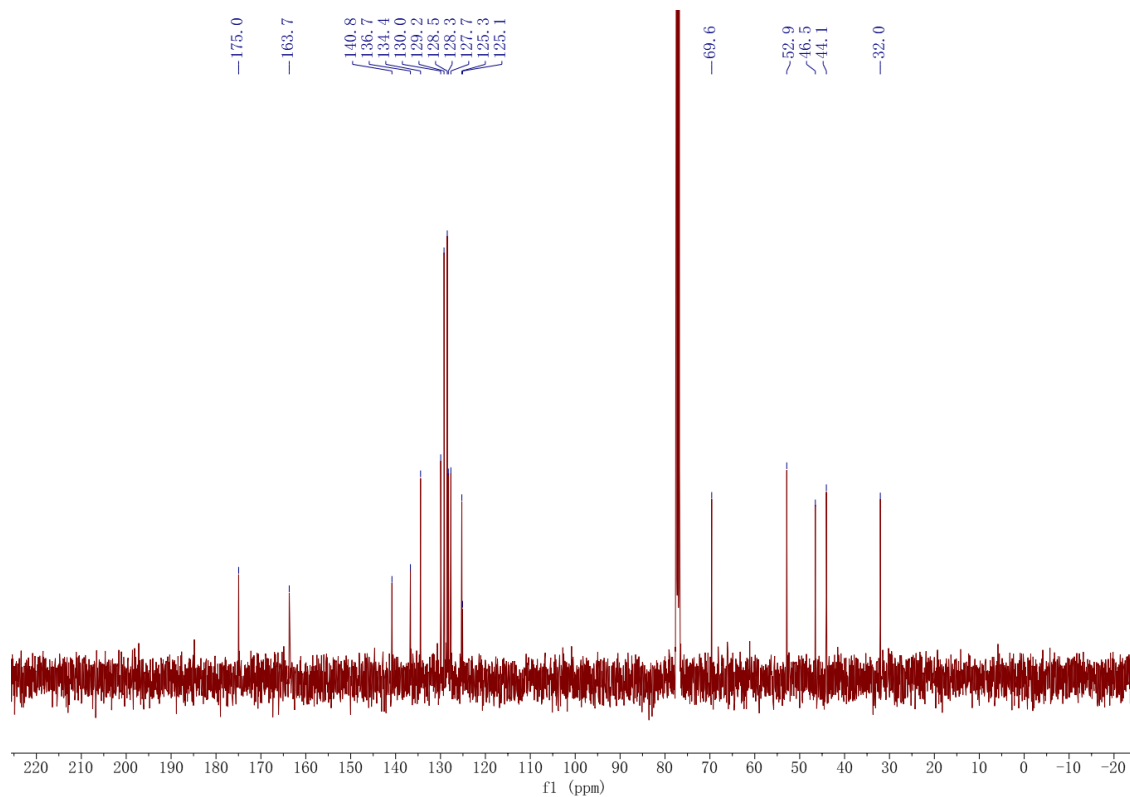

**<sup>1</sup>H NMR of 32 (500 MHz, CDCl<sub>3</sub>)**

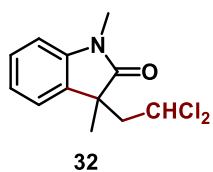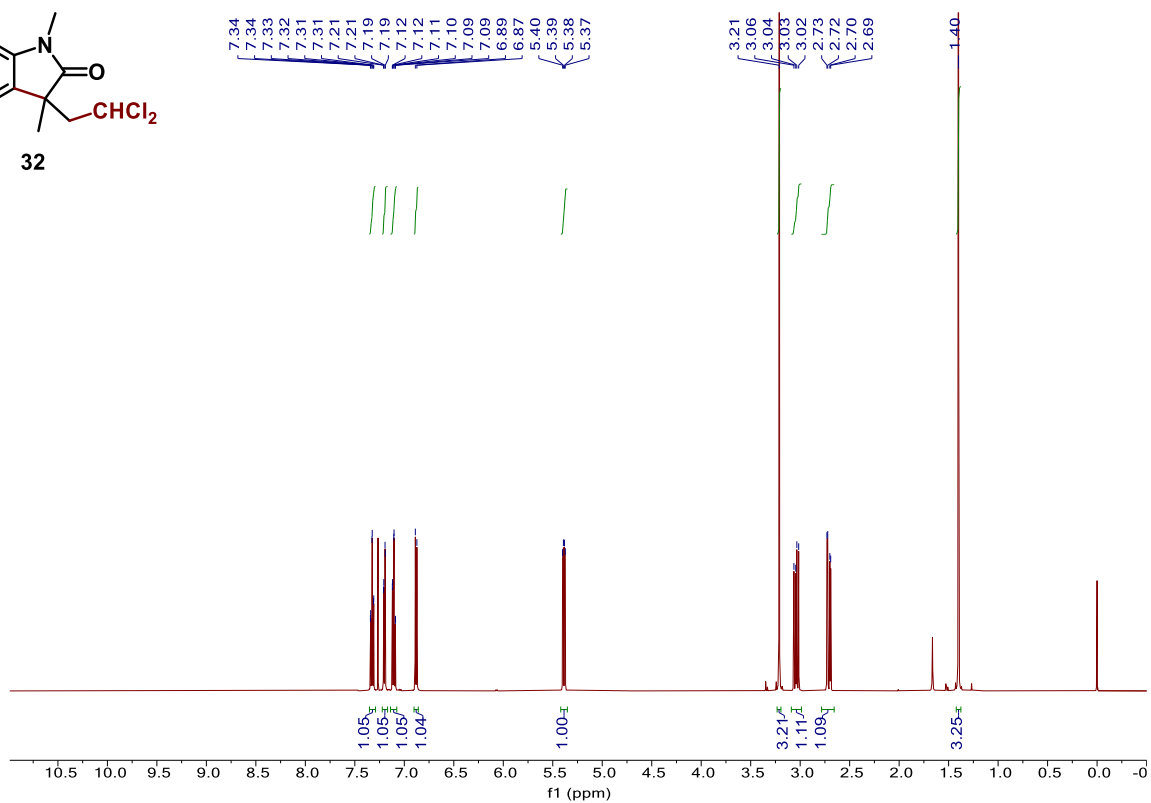

**<sup>13</sup>C NMR of 32 (126 MHz, CDCl<sub>3</sub>)**

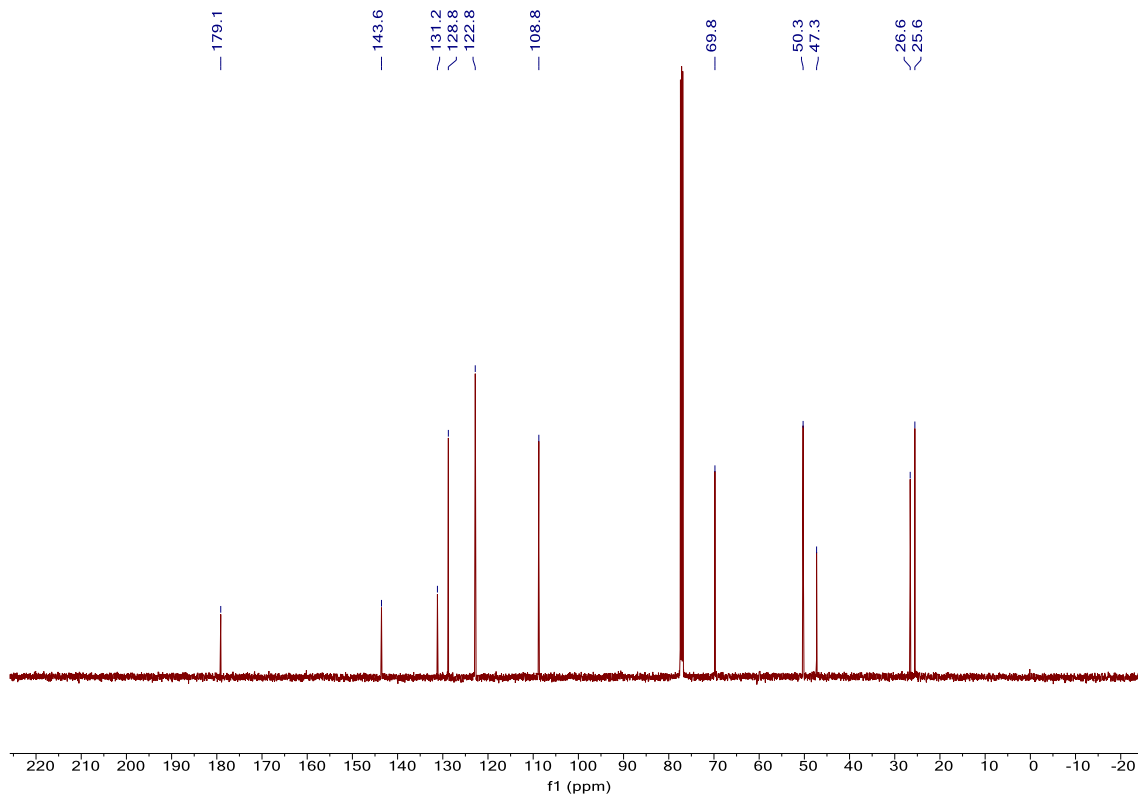

**<sup>1</sup>H NMR of 33 (400 MHz, CDCl<sub>3</sub>)**

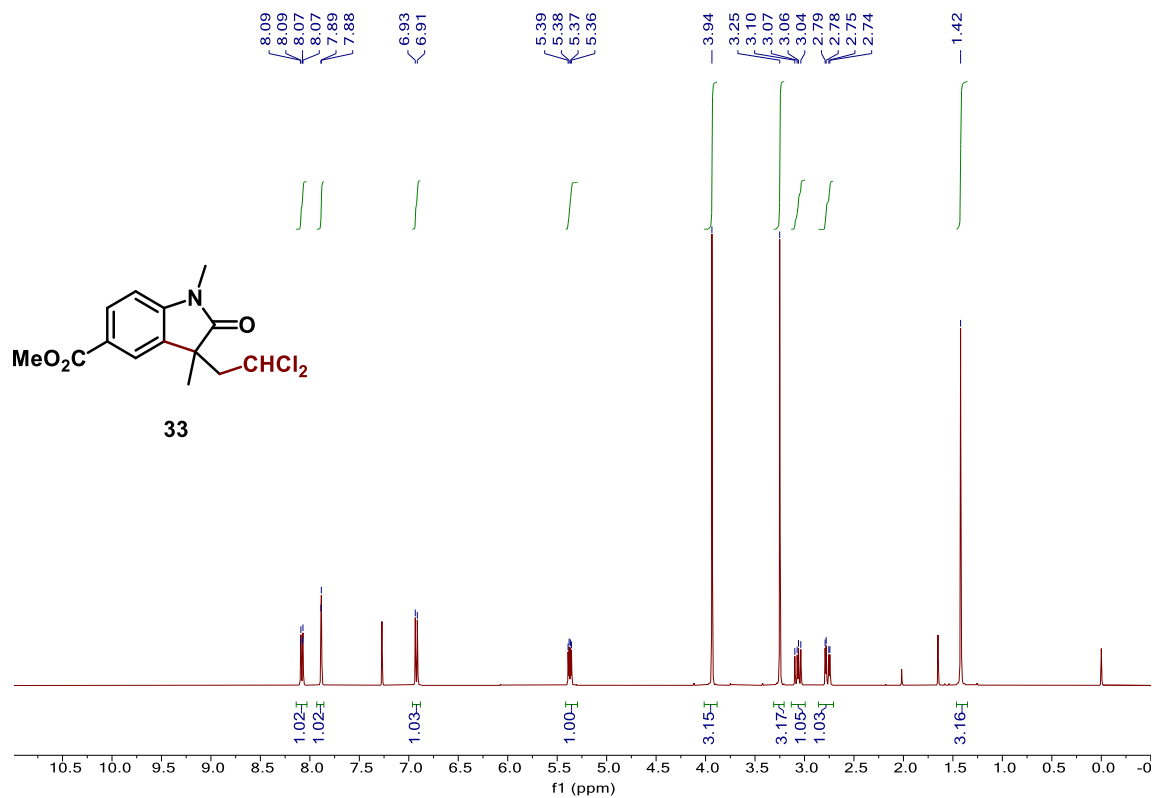

**<sup>13</sup>C NMR of 33 (101 MHz, CDCl<sub>3</sub>)**

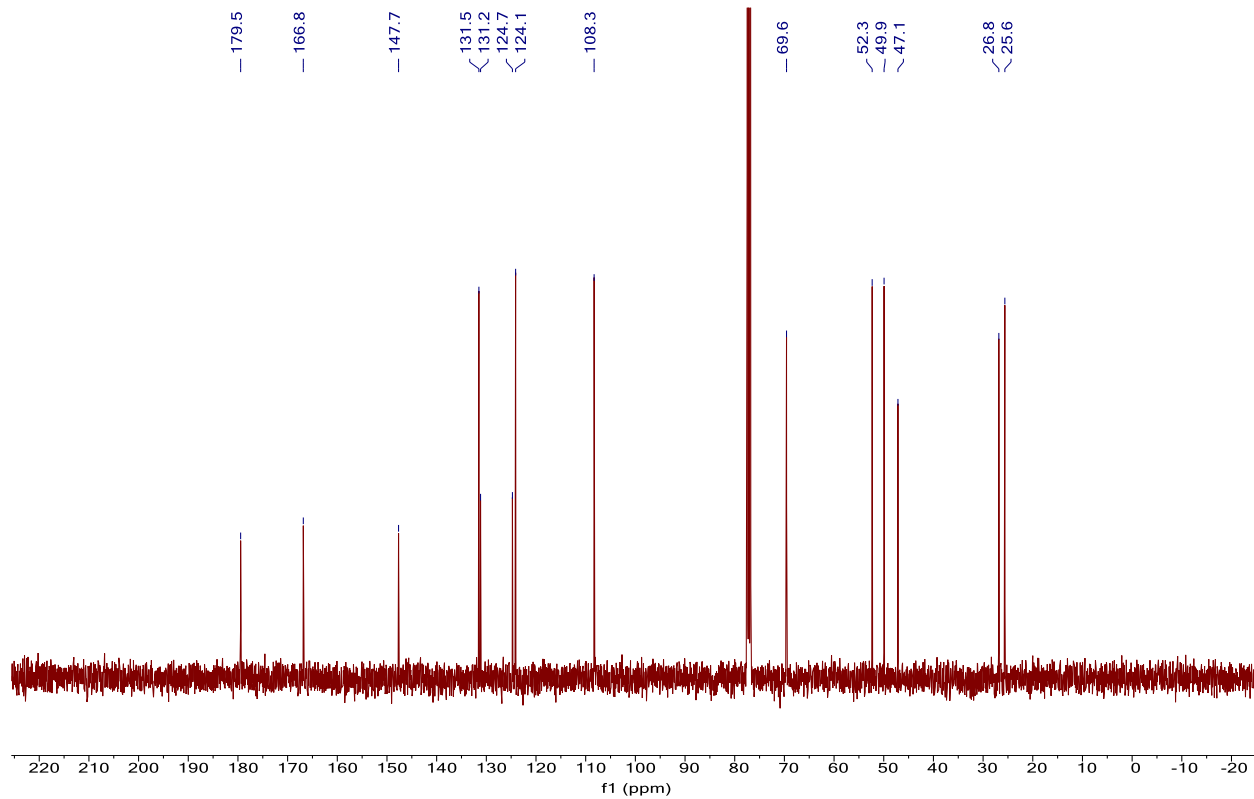

**<sup>1</sup>H NMR of 34 (500 MHz, CDCl<sub>3</sub>)**

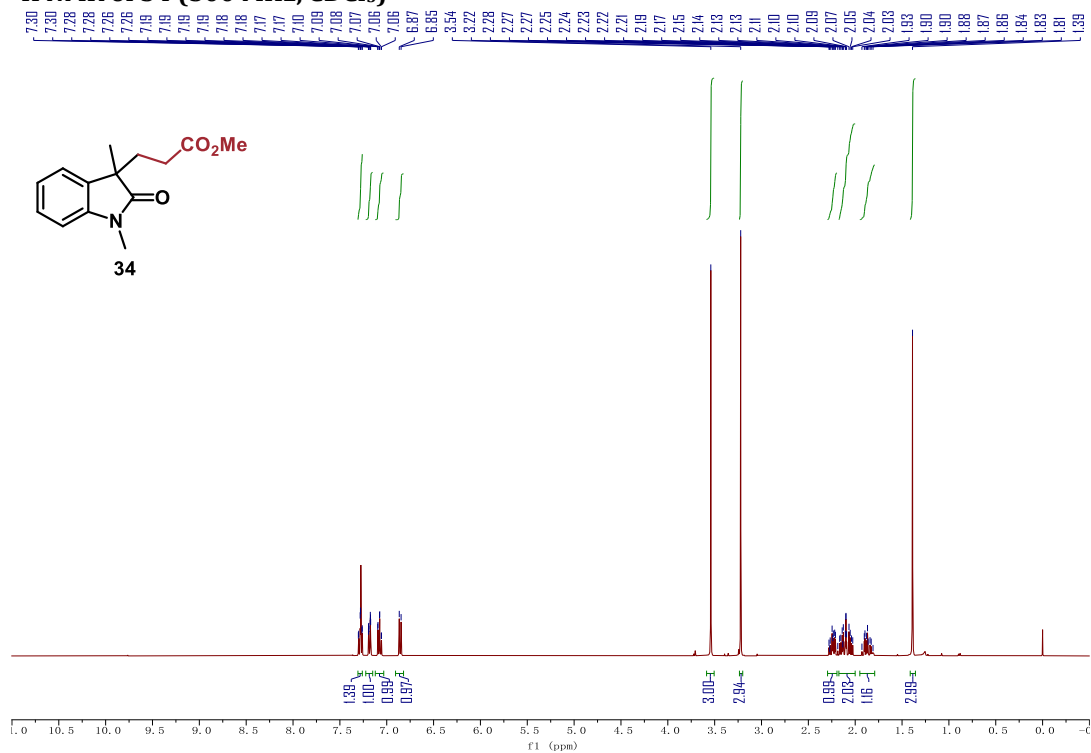

**<sup>13</sup>C NMR of 34 (101 MHz, CDCl<sub>3</sub>)**

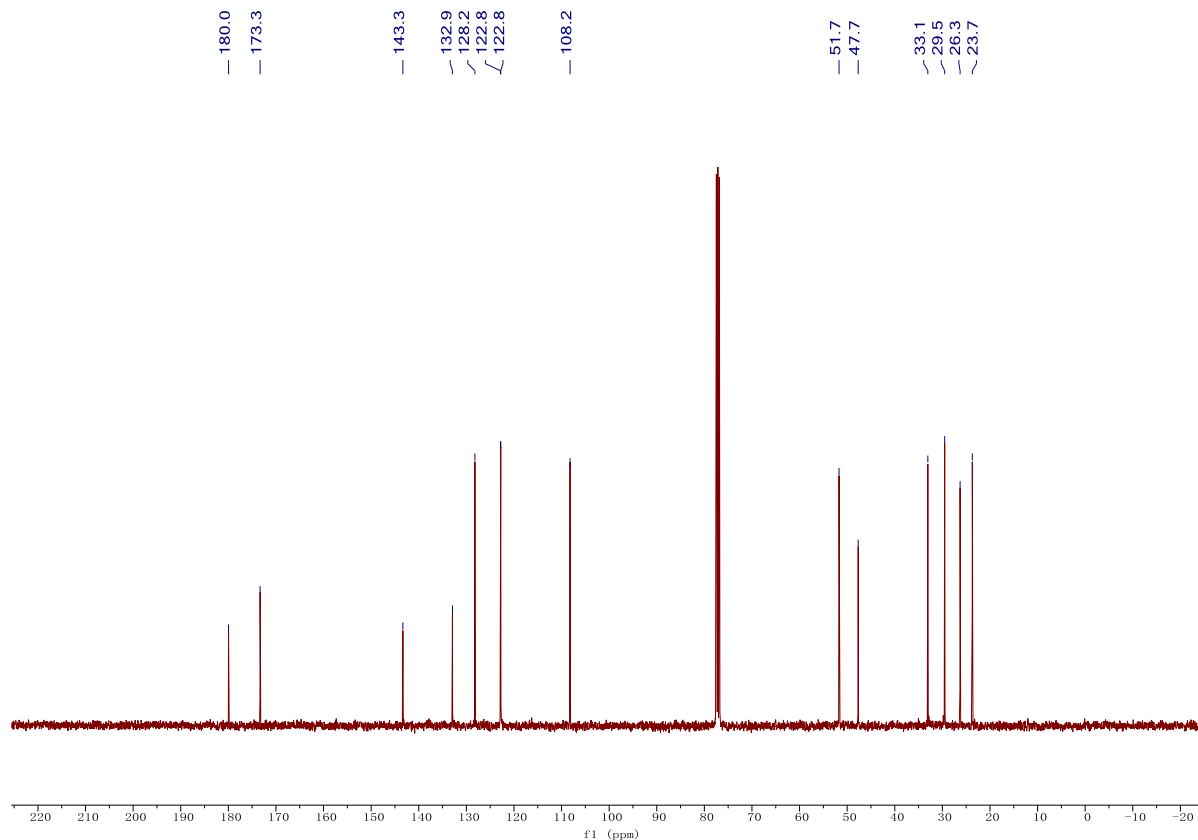

**<sup>1</sup>H NMR of 35 (500 MHz, CDCl<sub>3</sub>)**

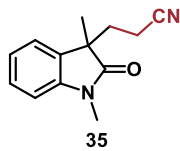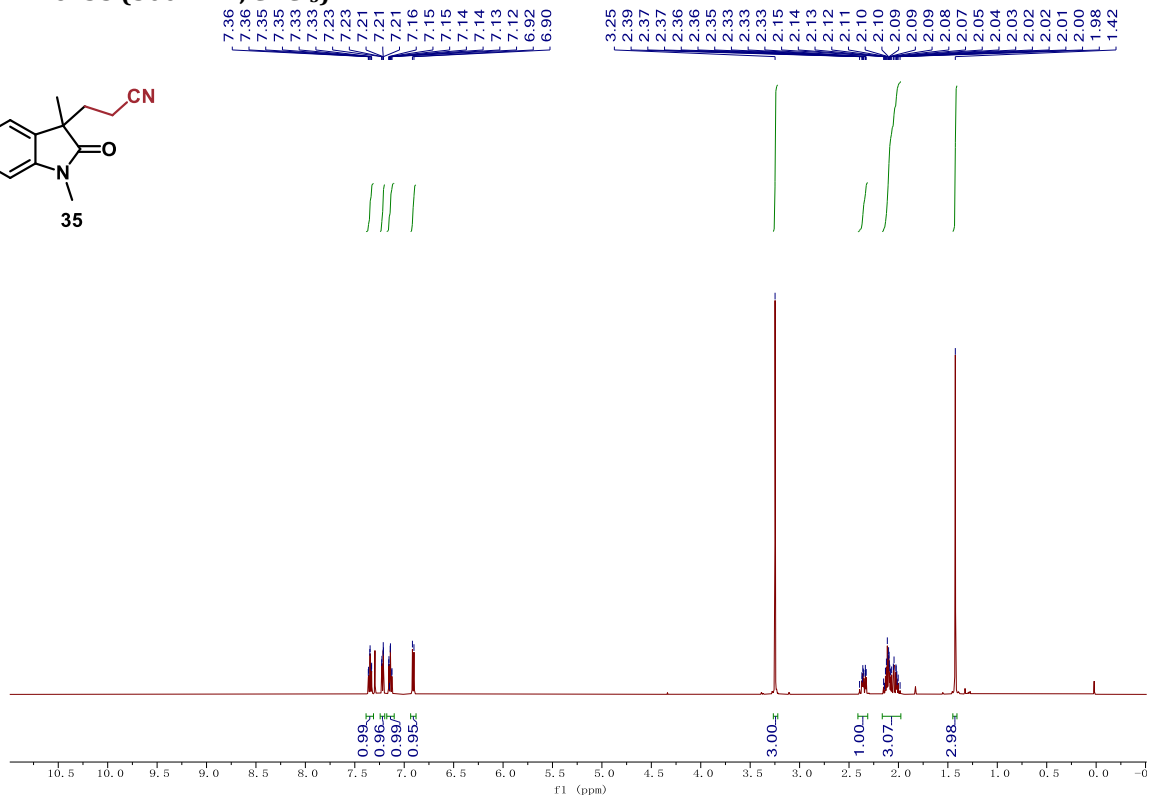

**<sup>13</sup>C NMR of 35 (126 MHz, CDCl<sub>3</sub>)**

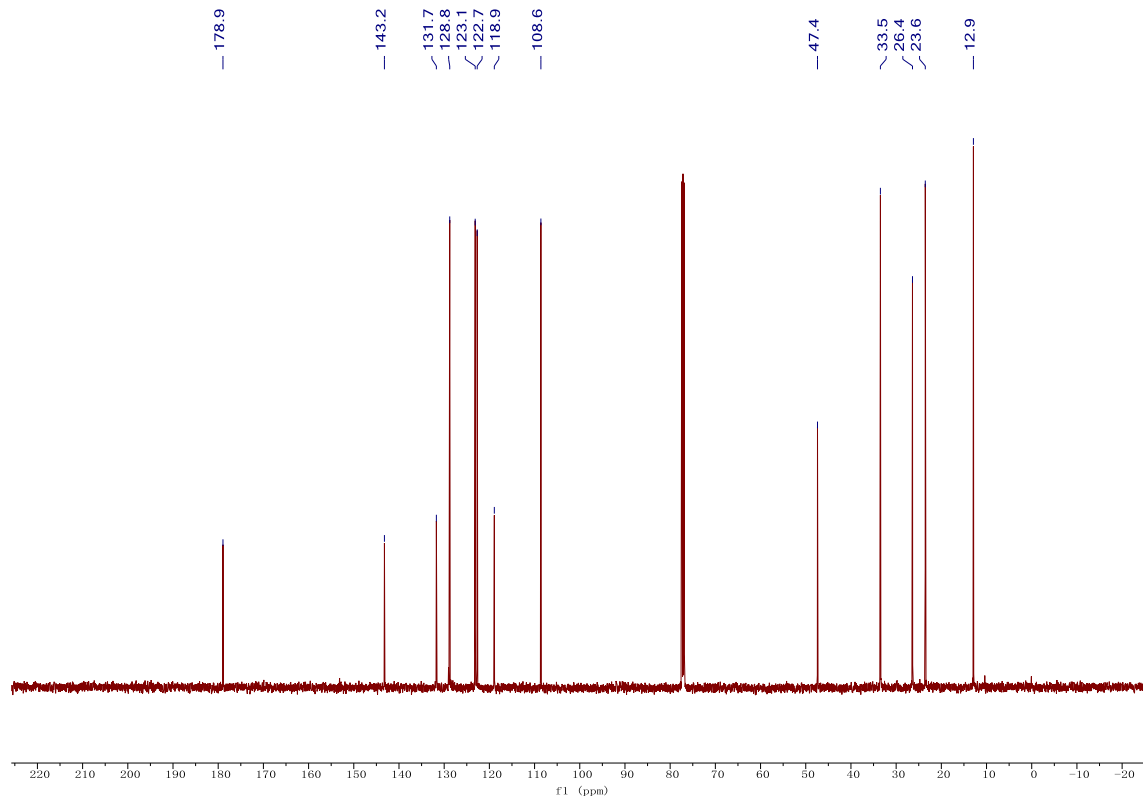



**<sup>1</sup>H NMR of 36 (400 MHz, CDCl<sub>3</sub>)**

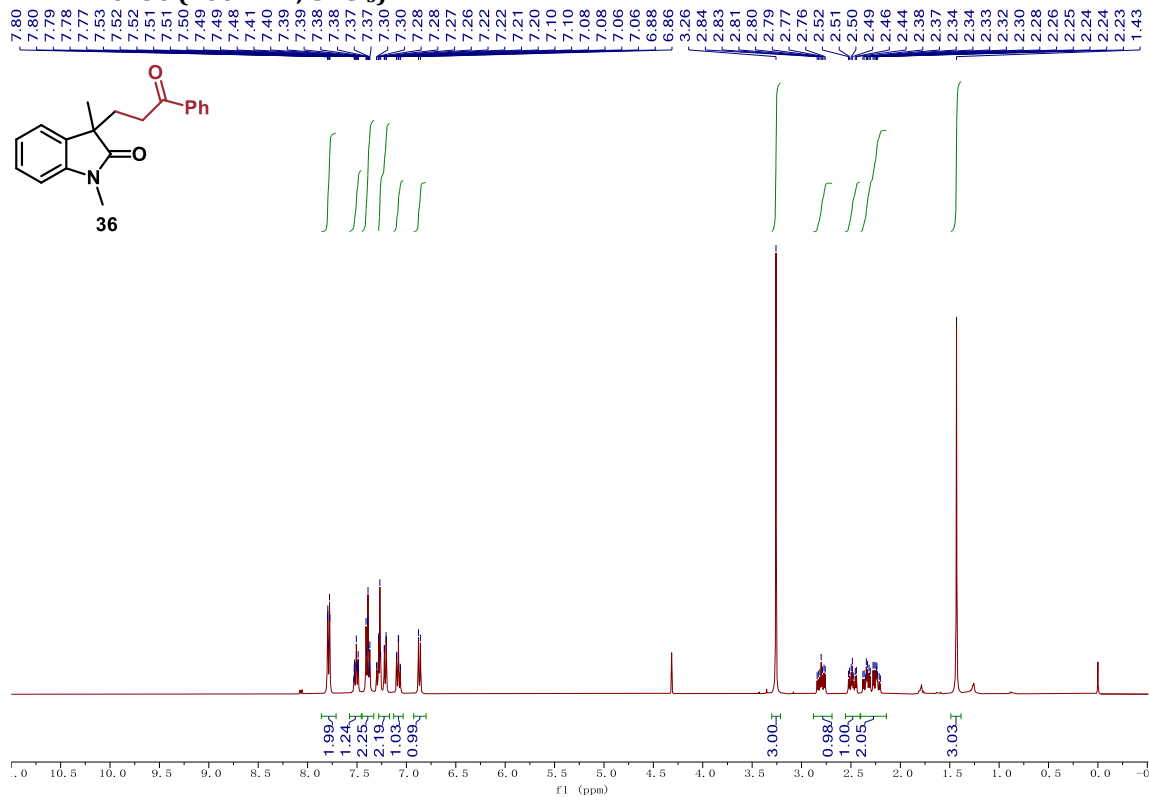

**<sup>13</sup>C NMR of 36 (101 MHz, CDCl<sub>3</sub>)**

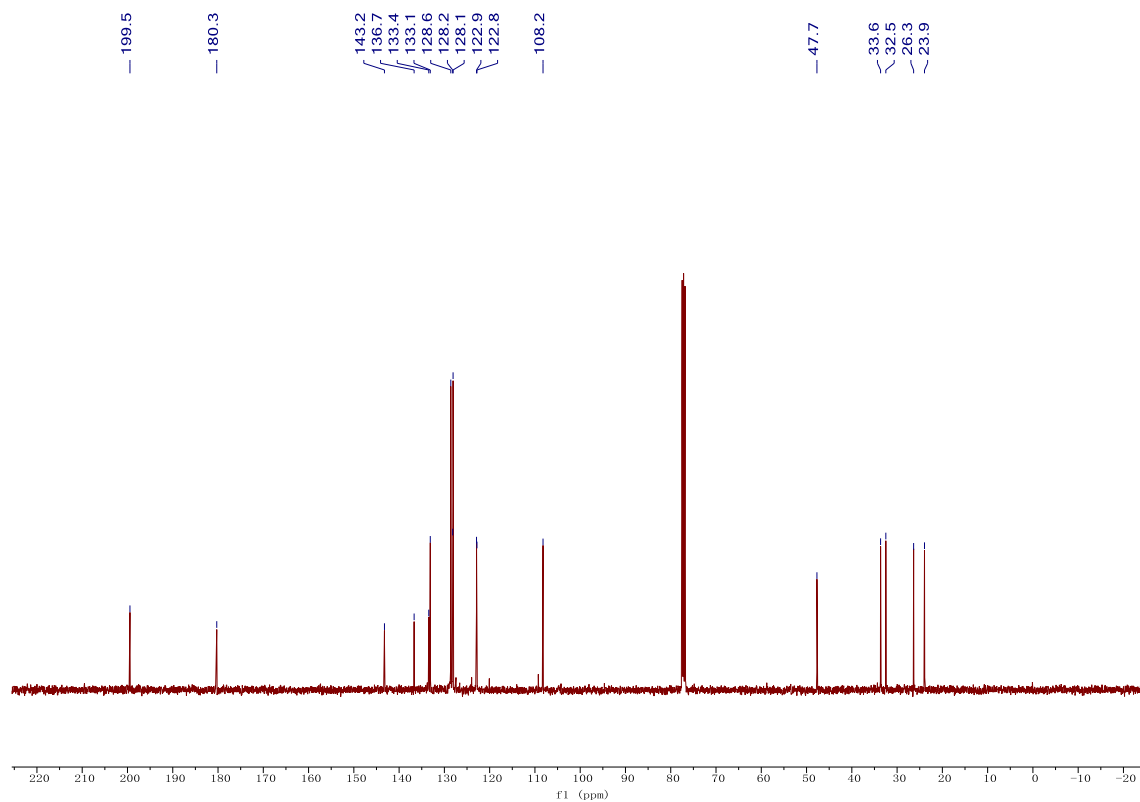

**<sup>1</sup>H NMR of 37 (500 MHz, CDCl<sub>3</sub>)**

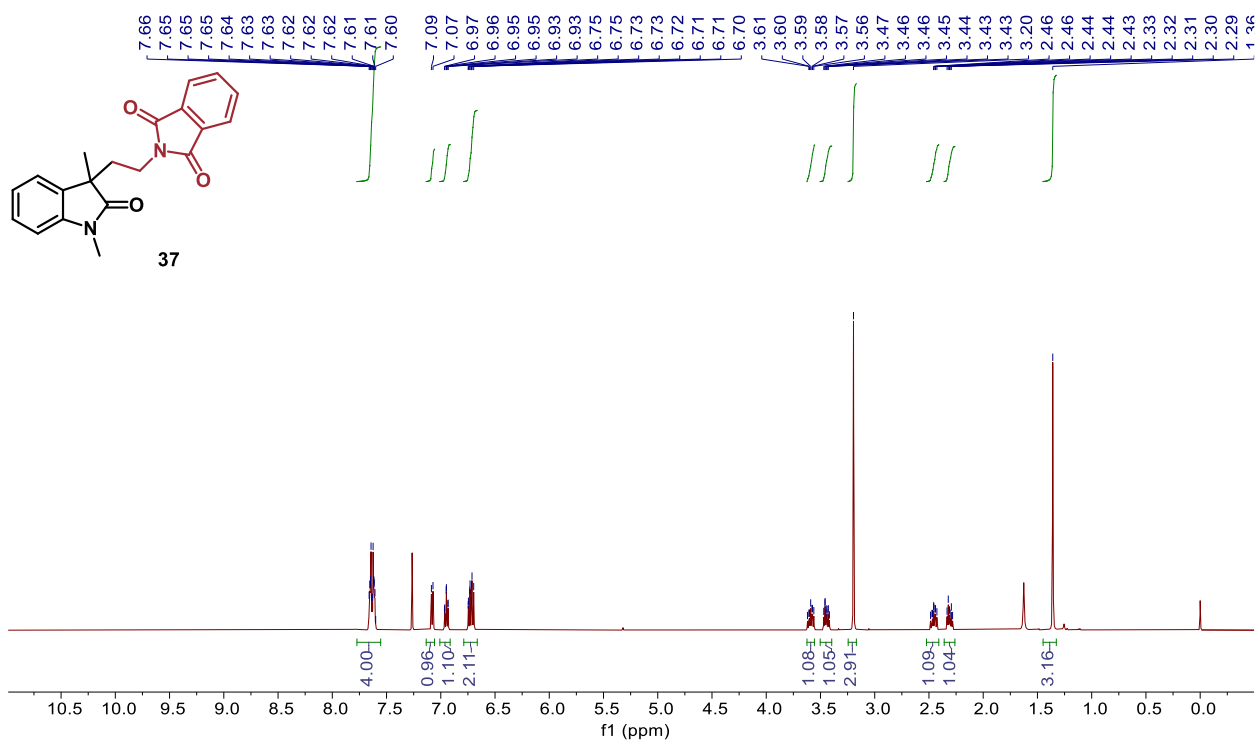

**<sup>13</sup>C NMR of 37 (126 MHz, CDCl<sub>3</sub>)**

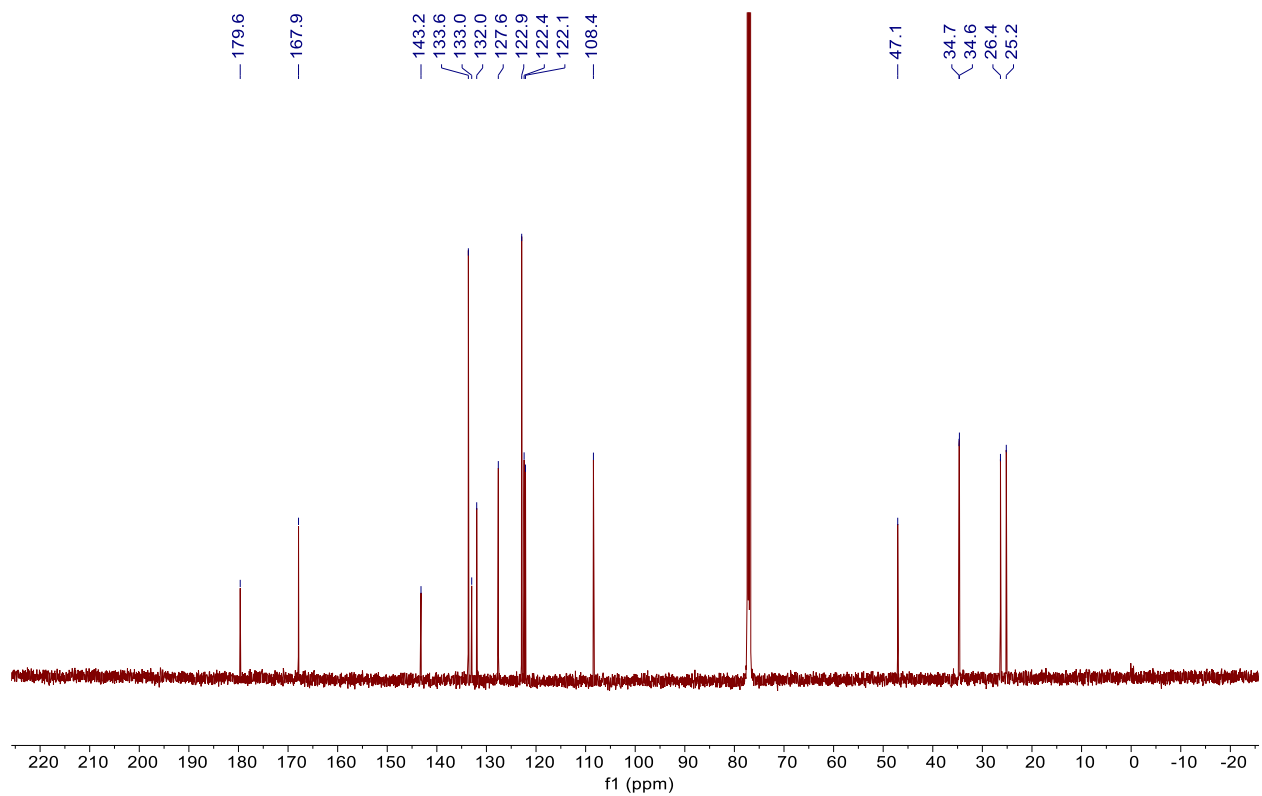

**<sup>1</sup>H NMR of 38 (500 MHz, CDCl<sub>3</sub>)**

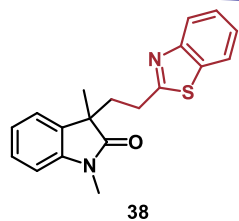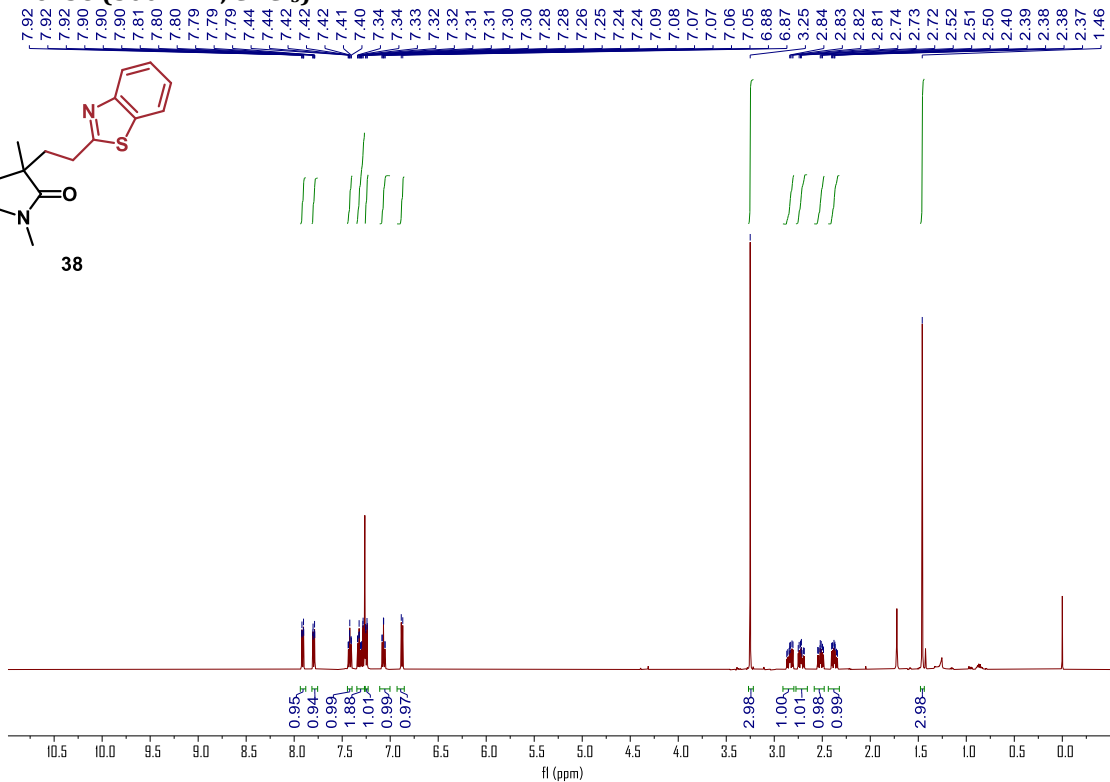

**<sup>13</sup>C NMR of 38 (126 MHz, CDCl<sub>3</sub>)**

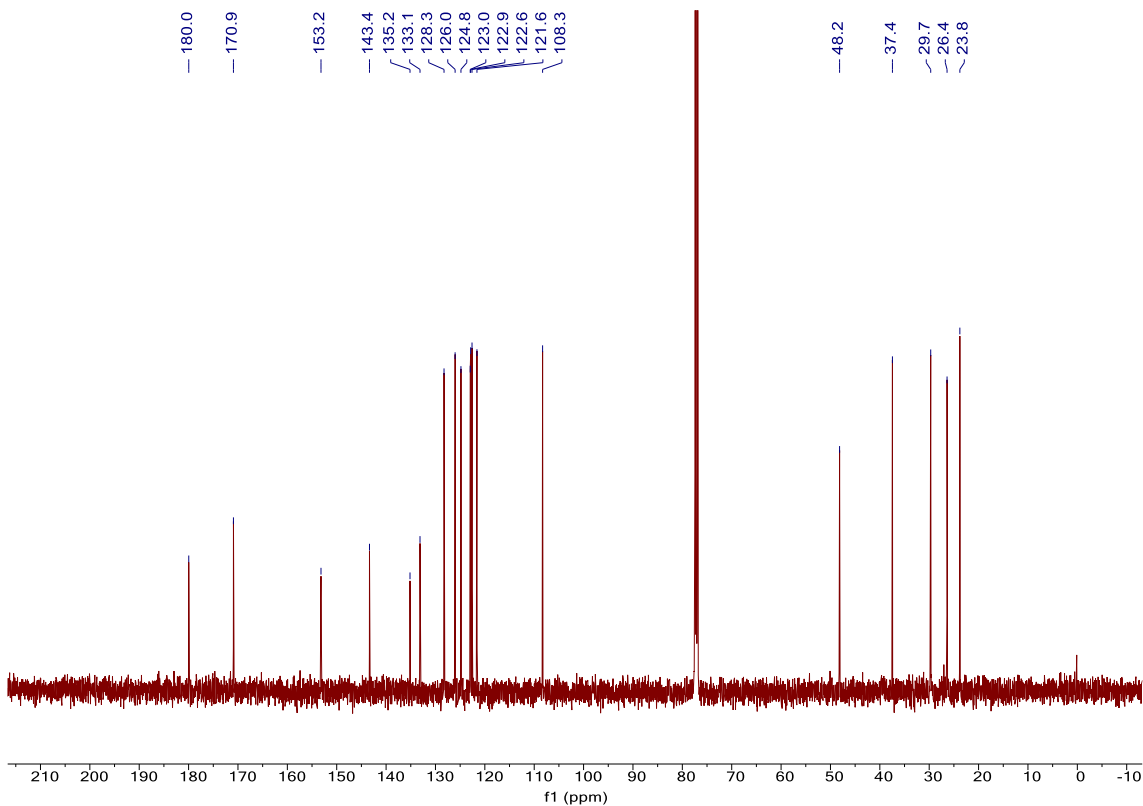

**<sup>1</sup>H NMR of 39 (500 MHz, CDCl<sub>3</sub>)**

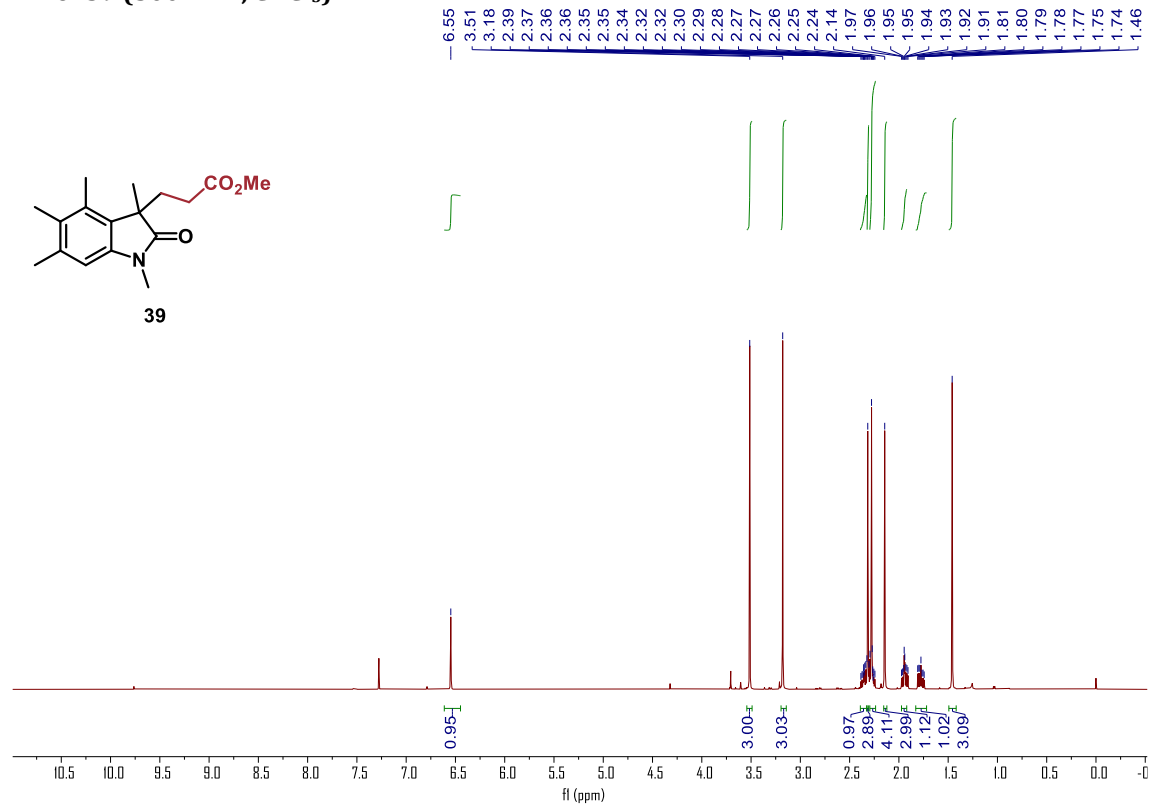

**<sup>13</sup>C NMR of 39 (126 MHz, CDCl<sub>3</sub>)**

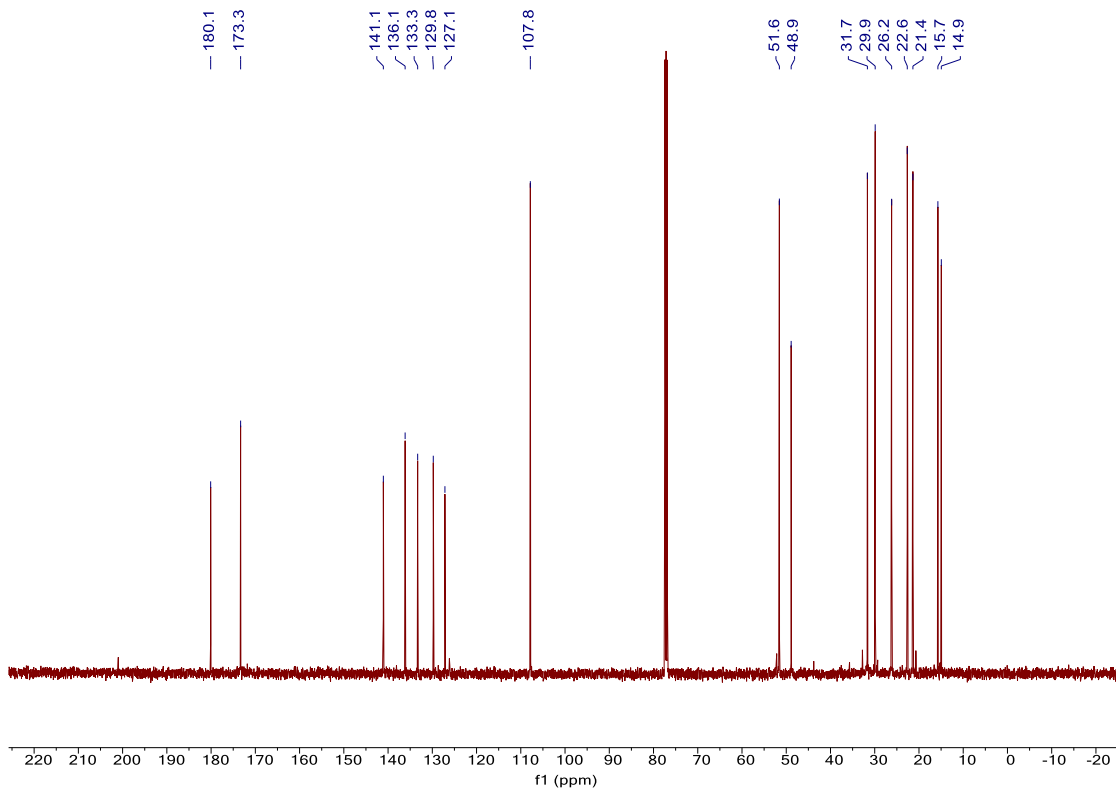

**<sup>1</sup>H NMR of 40 (500 MHz, CDCl<sub>3</sub>)**

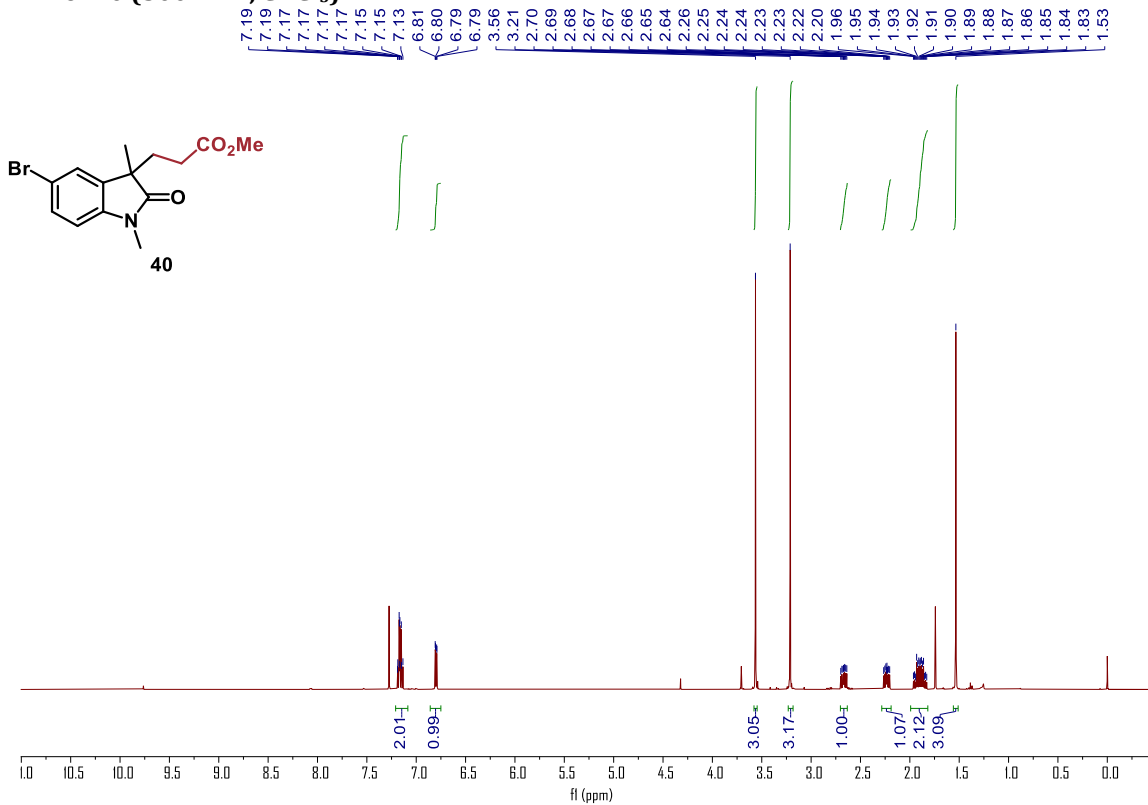

**<sup>13</sup>C NMR of 40 (126 MHz, CDCl<sub>3</sub>)**

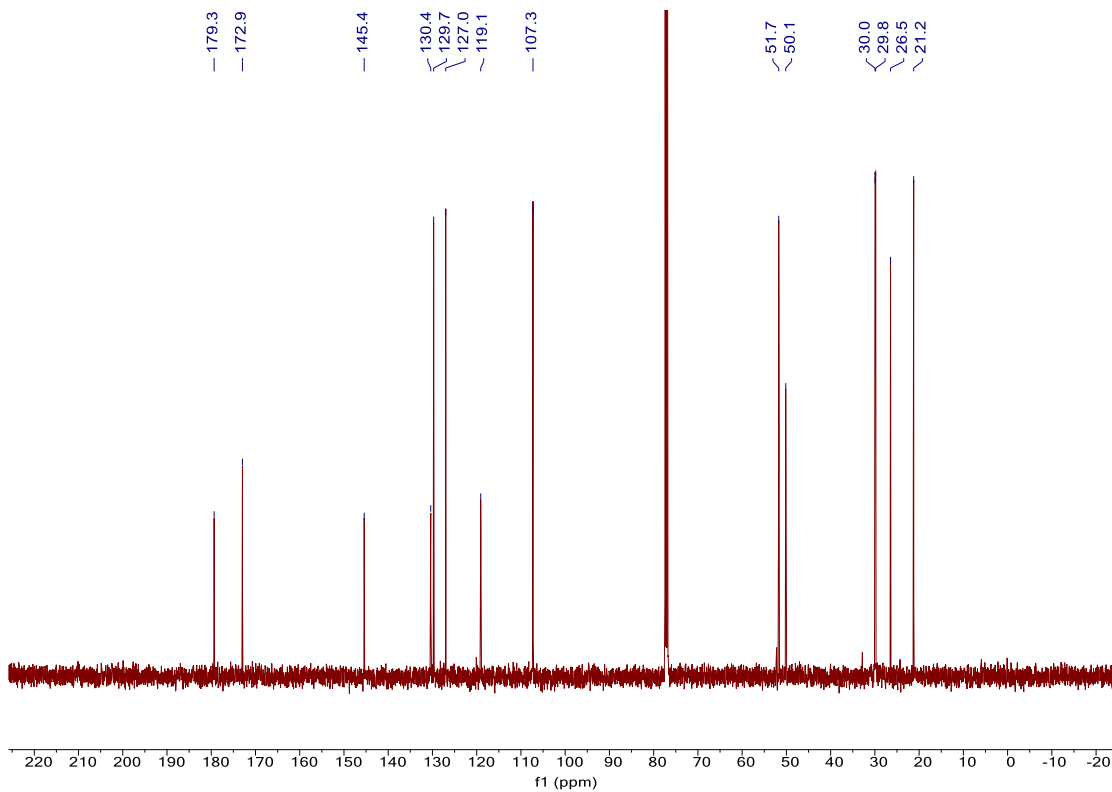

**<sup>1</sup>H NMR of 41 (500 MHz, CDCl<sub>3</sub>)**

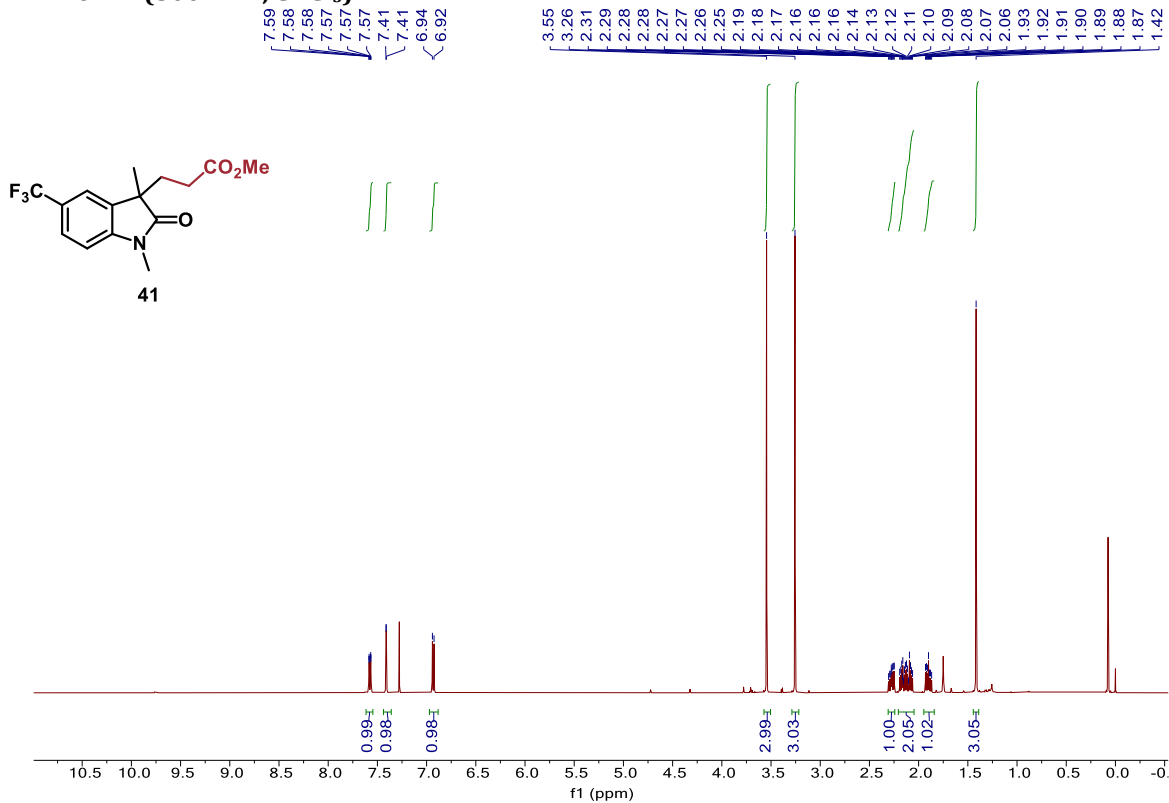

**<sup>13</sup>C NMR of 41 (126 MHz, CDCl<sub>3</sub>)**

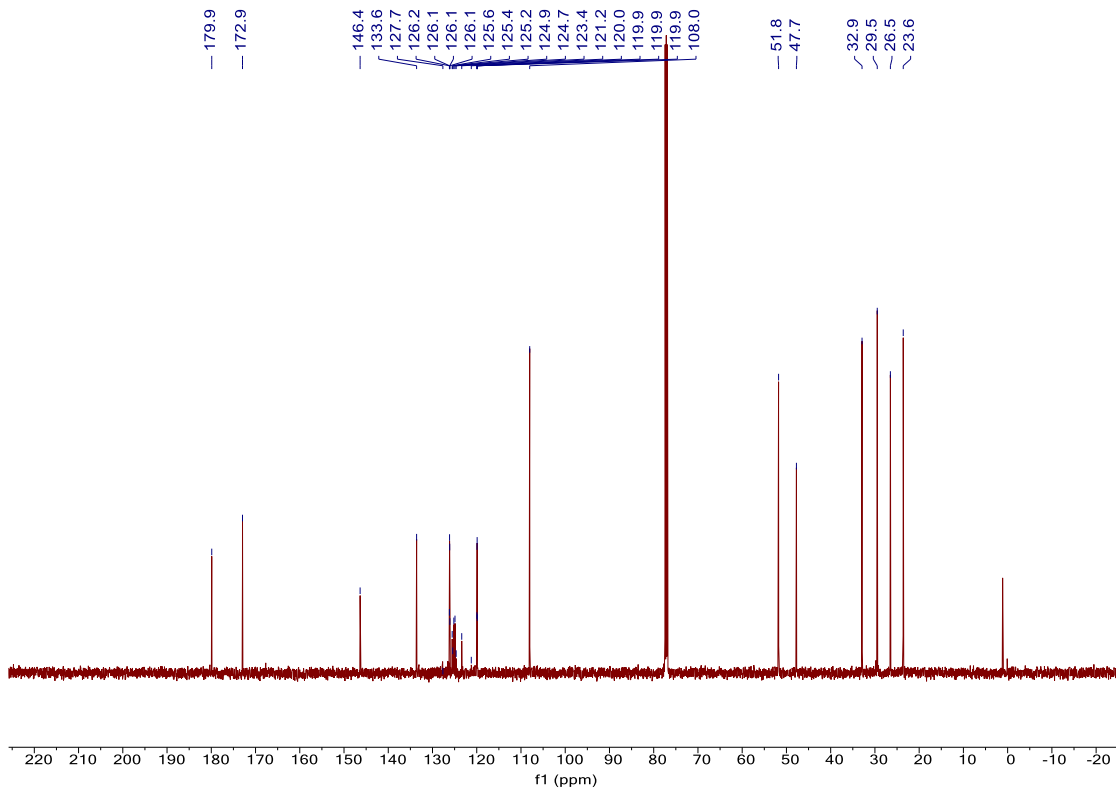

**$^{19}\text{F}$  NMR of 41 (471 MHz,  $\text{CDCl}_3$ )**

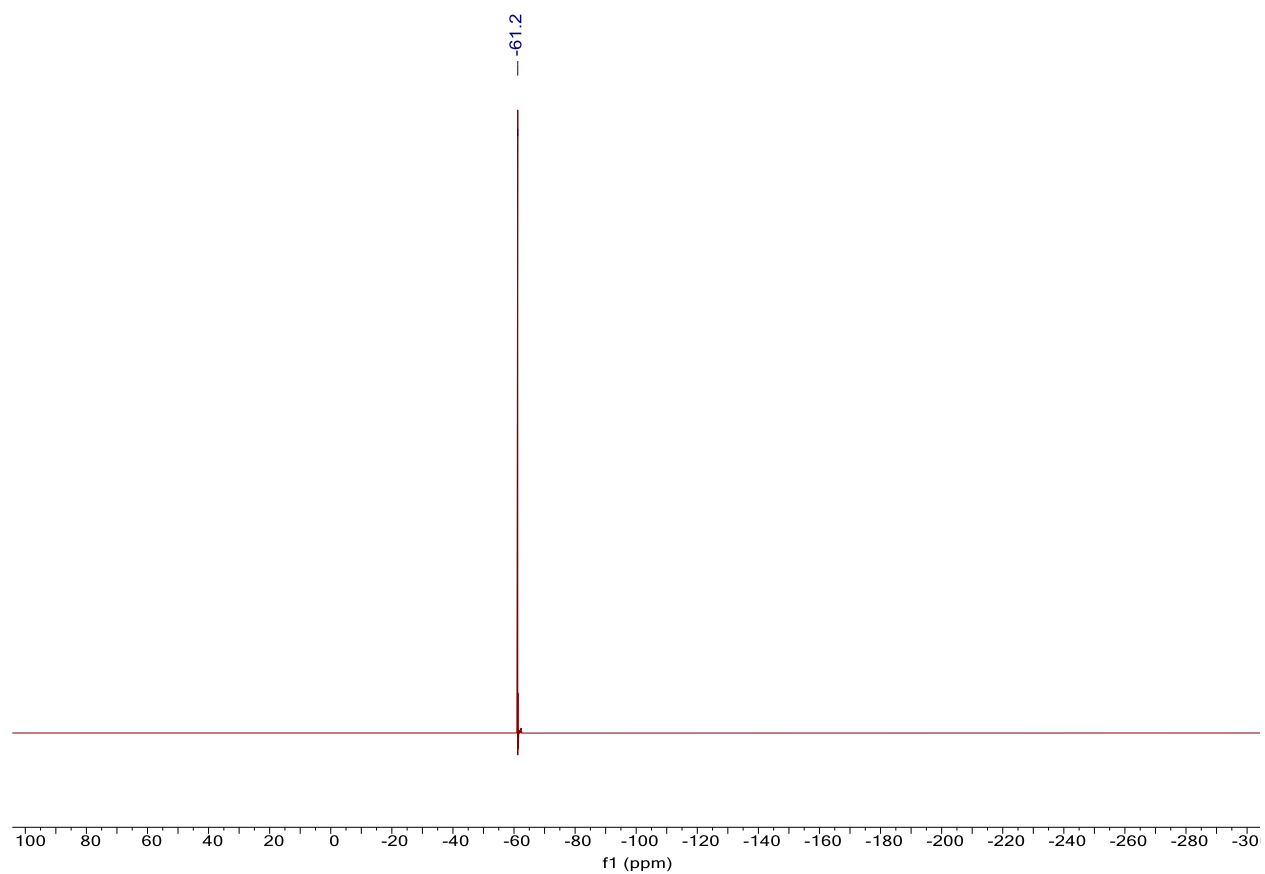

**<sup>1</sup>H NMR of 42 (400 MHz, CDCl<sub>3</sub>)**

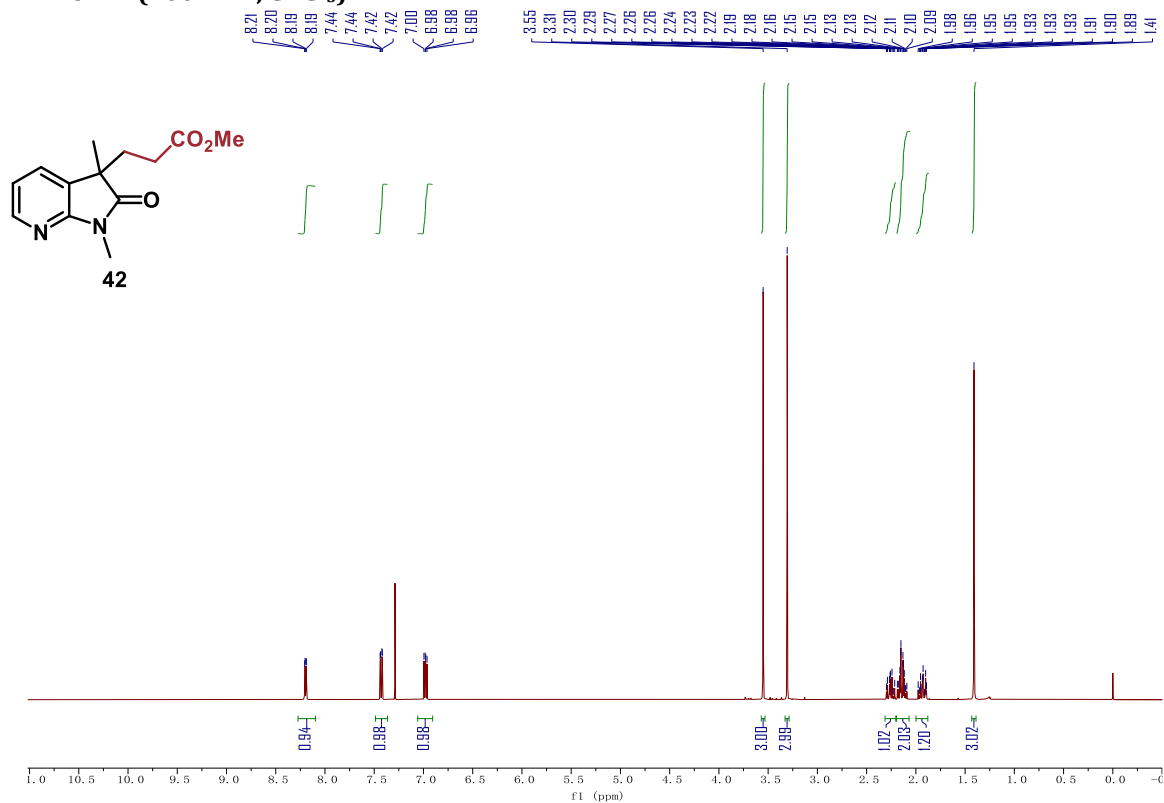

**<sup>13</sup>C NMR of 42 (101 MHz, CDCl<sub>3</sub>)**

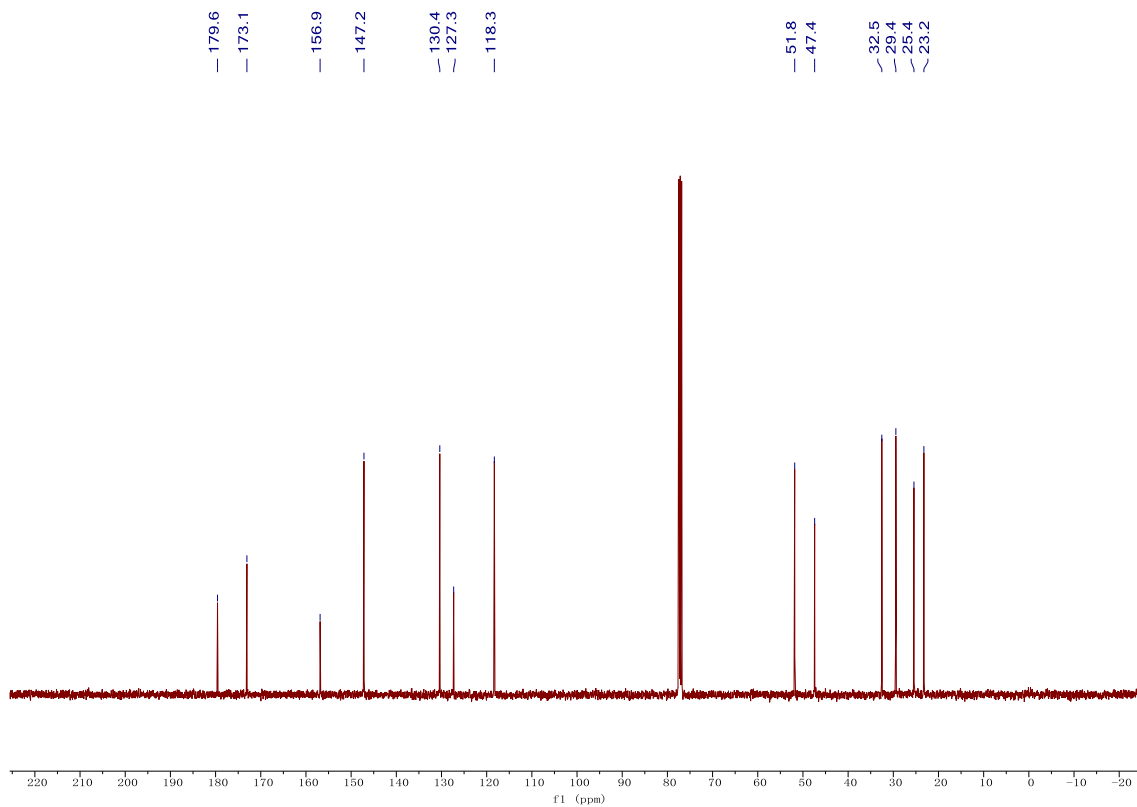



### <sup>1</sup>H NMR of 43 (400 MHz, CDCl<sub>3</sub>)

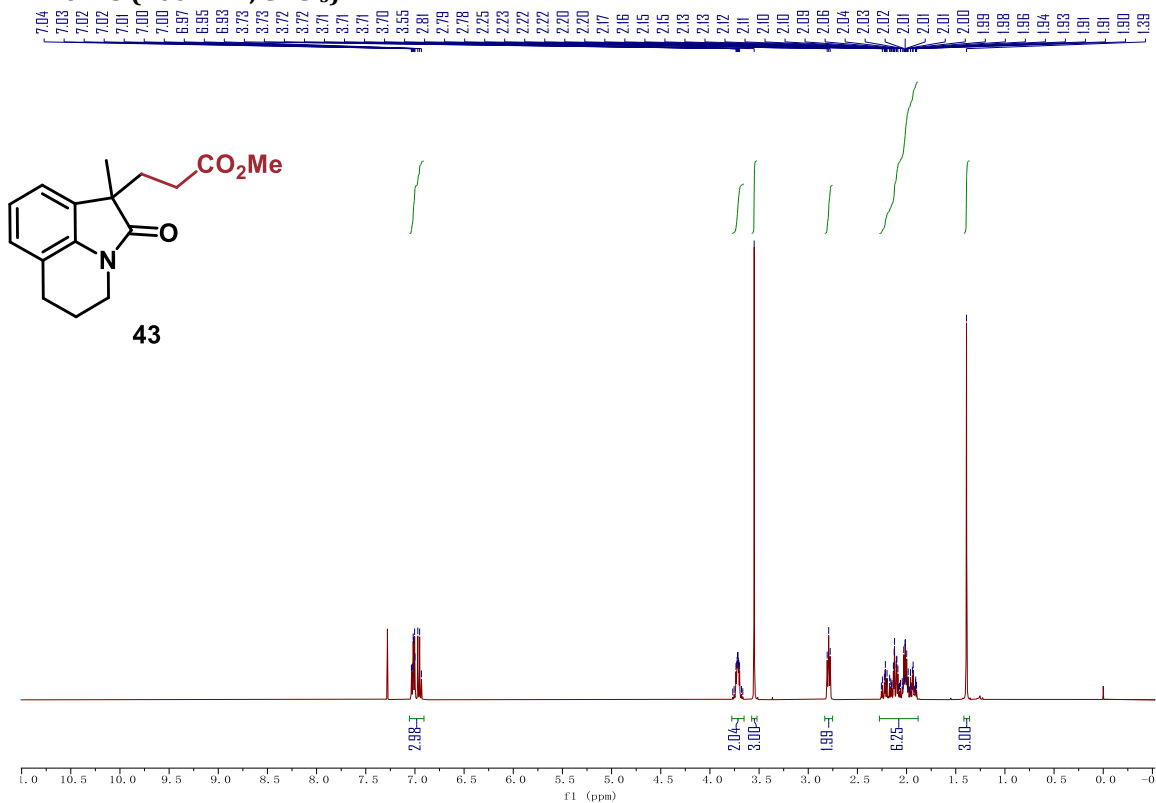

### <sup>13</sup>C NMR of 43 (101 MHz, CDCl<sub>3</sub>)

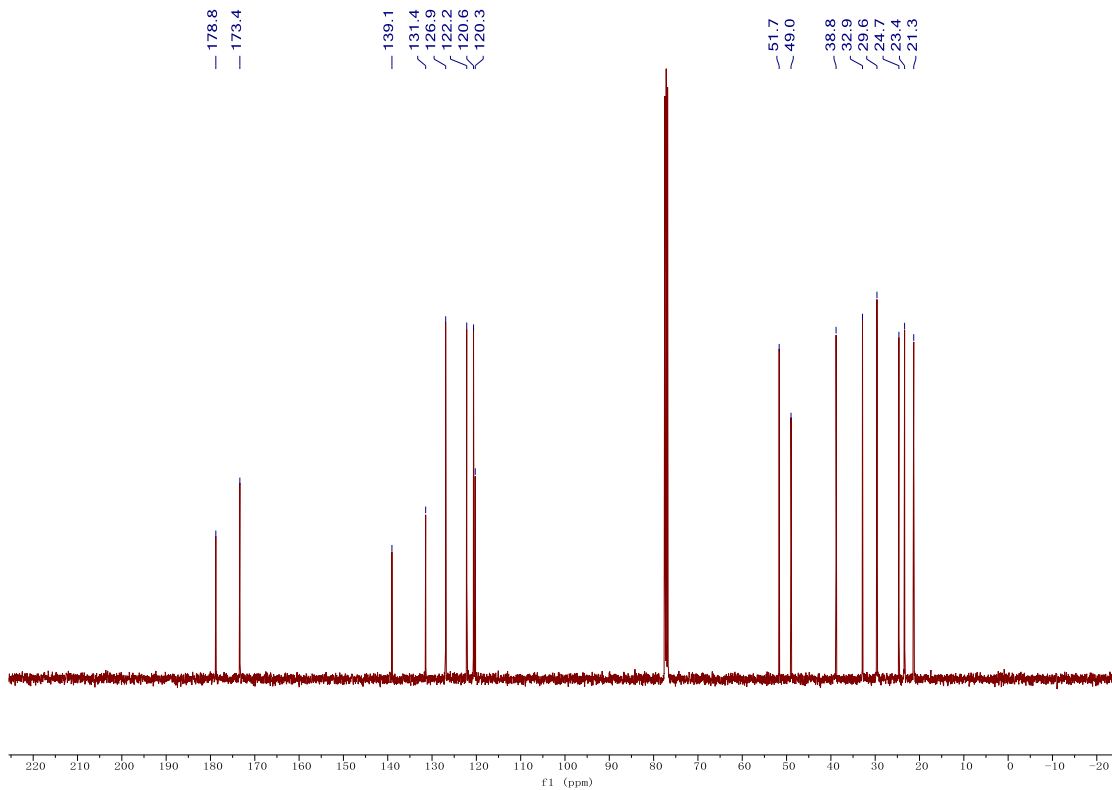

**<sup>1</sup>H NMR of 44 (500 MHz, CDCl<sub>3</sub>)**

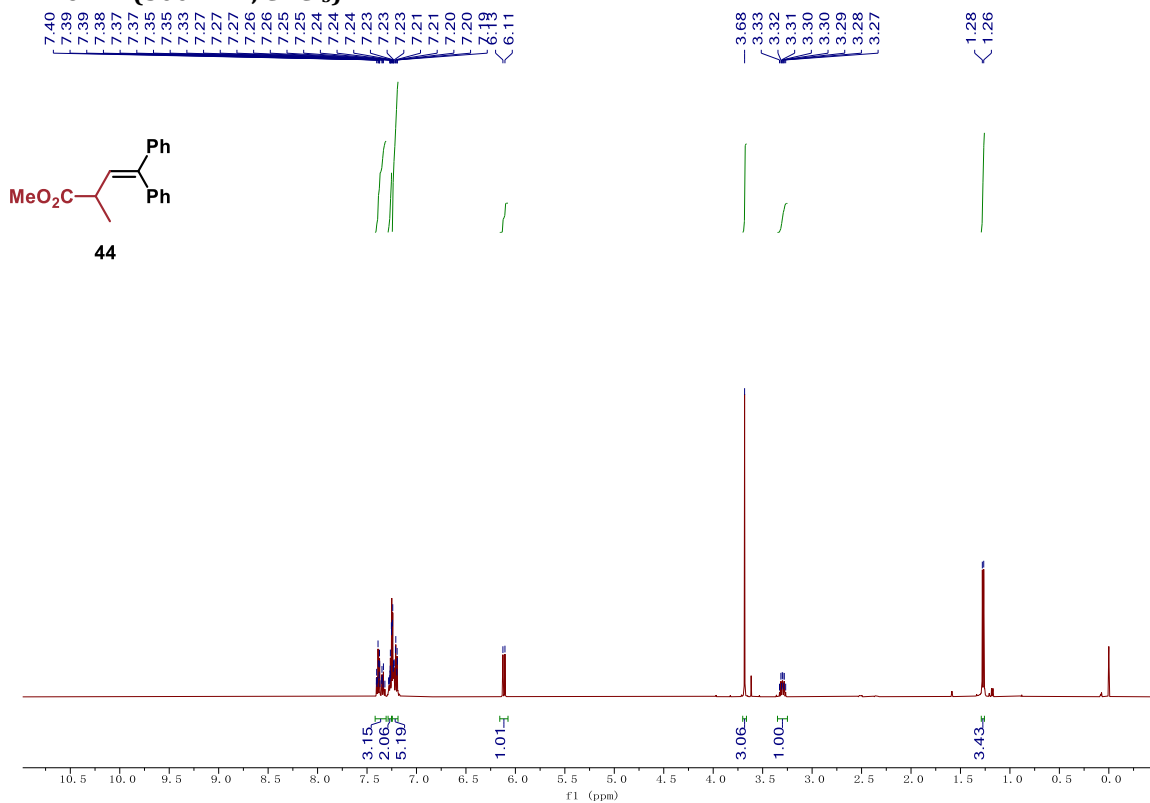

**<sup>13</sup>C NMR of 44 (126 MHz, CDCl<sub>3</sub>)**

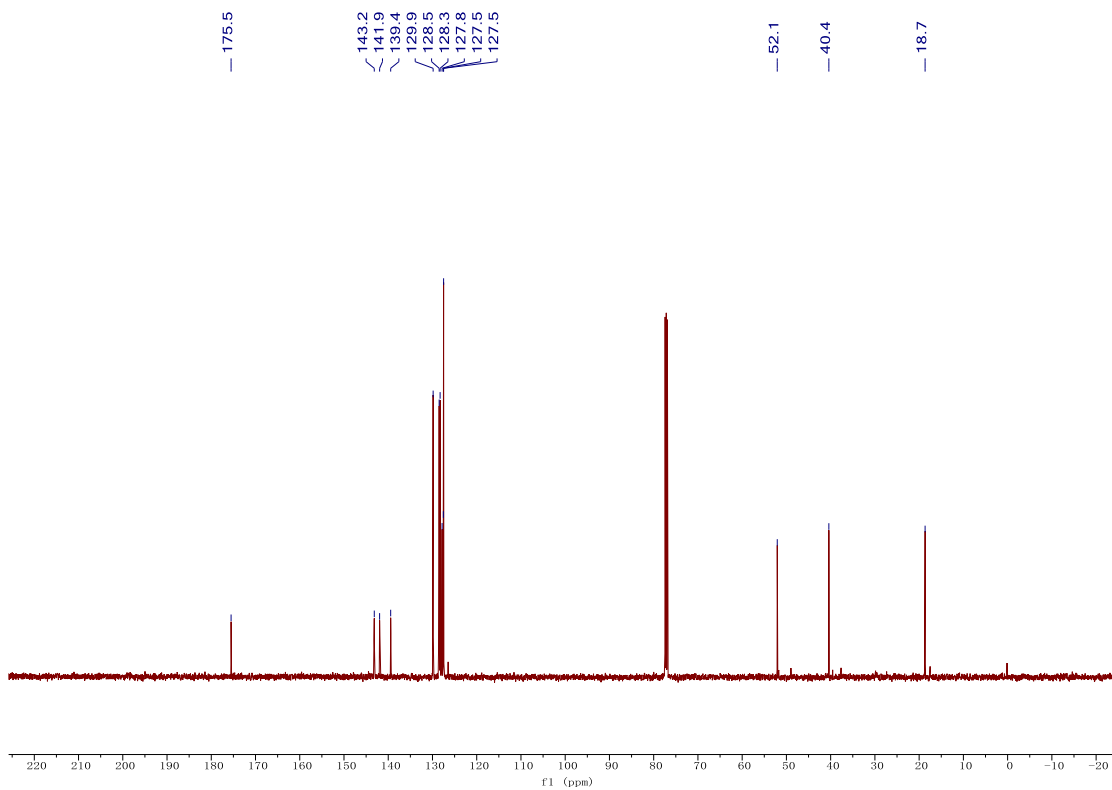

**<sup>1</sup>H NMR of 45 (500 MHz, CDCl<sub>3</sub>)**

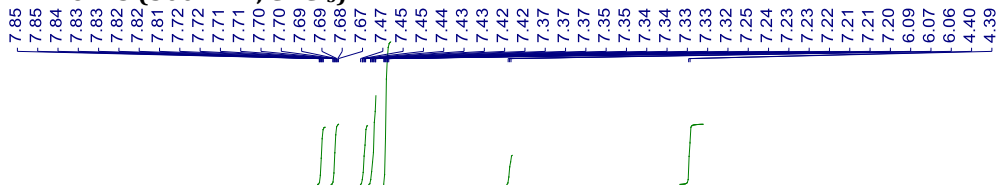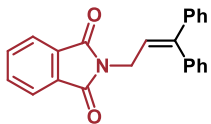

**45**

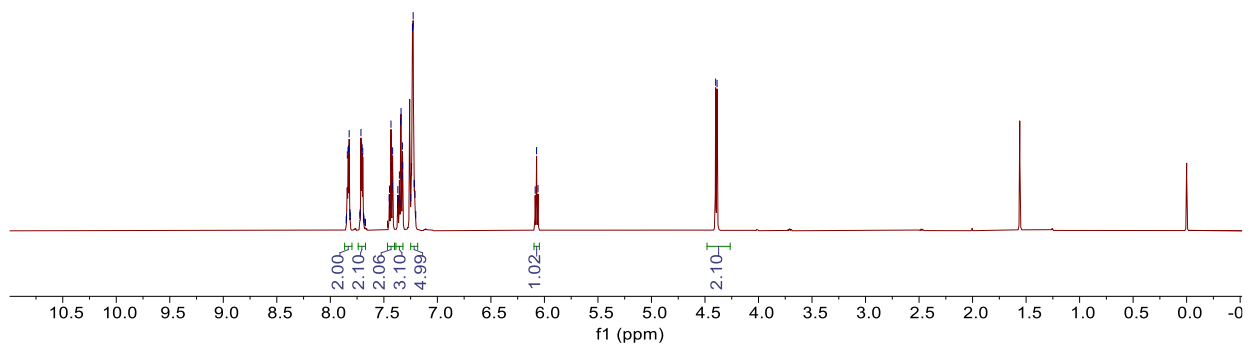

**<sup>13</sup>C NMR of 45 (126 MHz, CDCl<sub>3</sub>)**

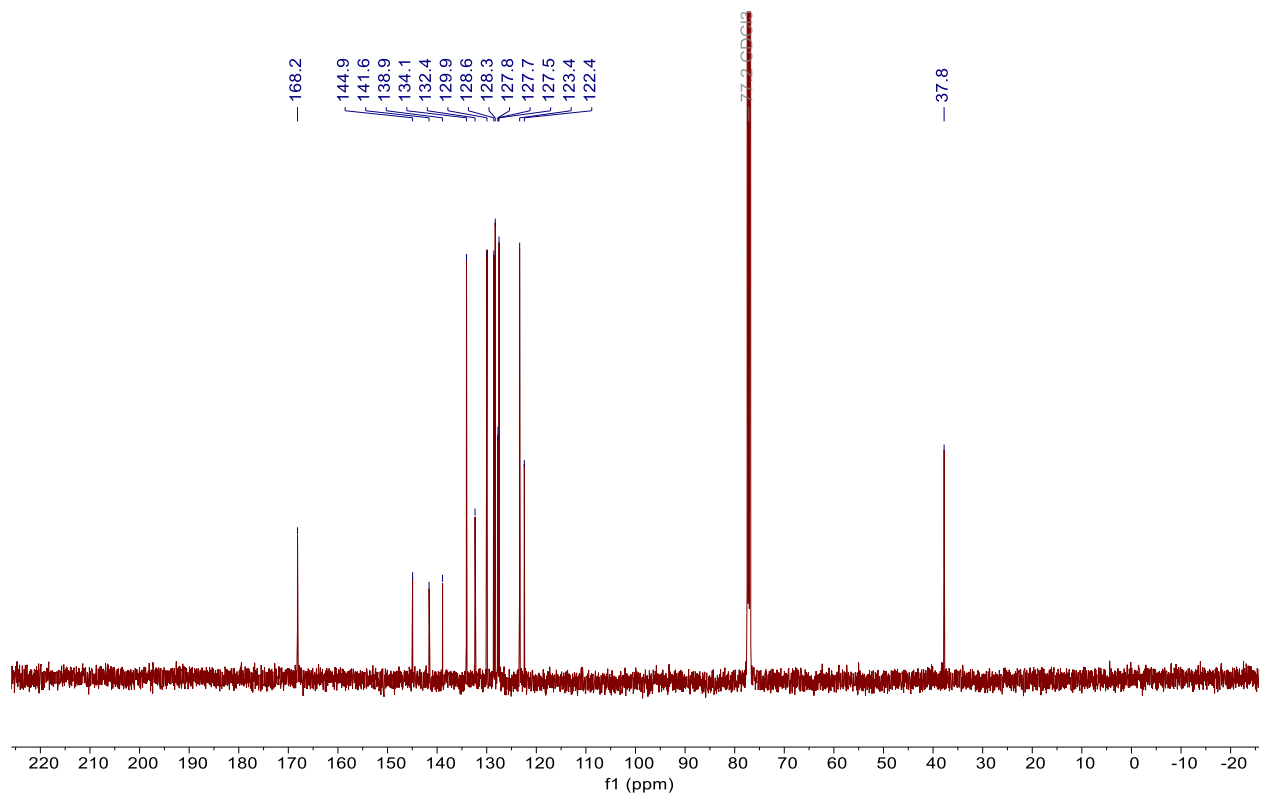

**<sup>1</sup>H NMR of 46 (500 MHz, CDCl<sub>3</sub>)**

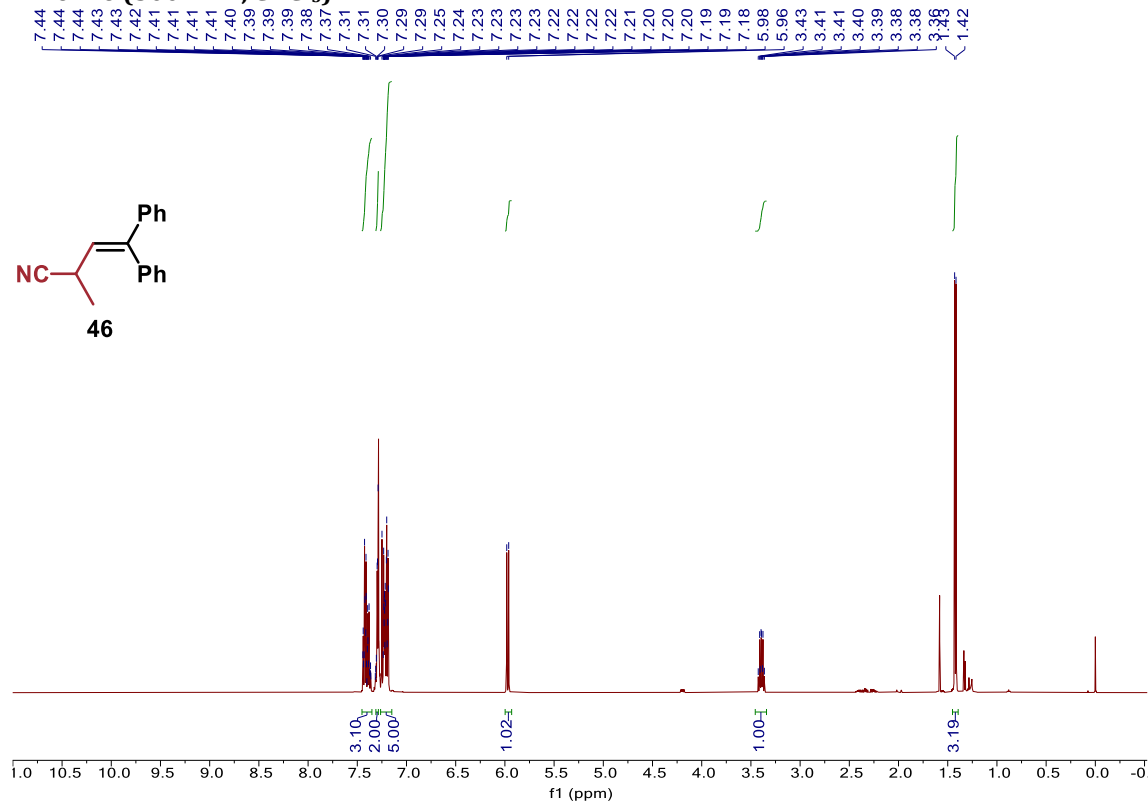

**<sup>13</sup>C NMR of 46 (101 MHz, CDCl<sub>3</sub>)**

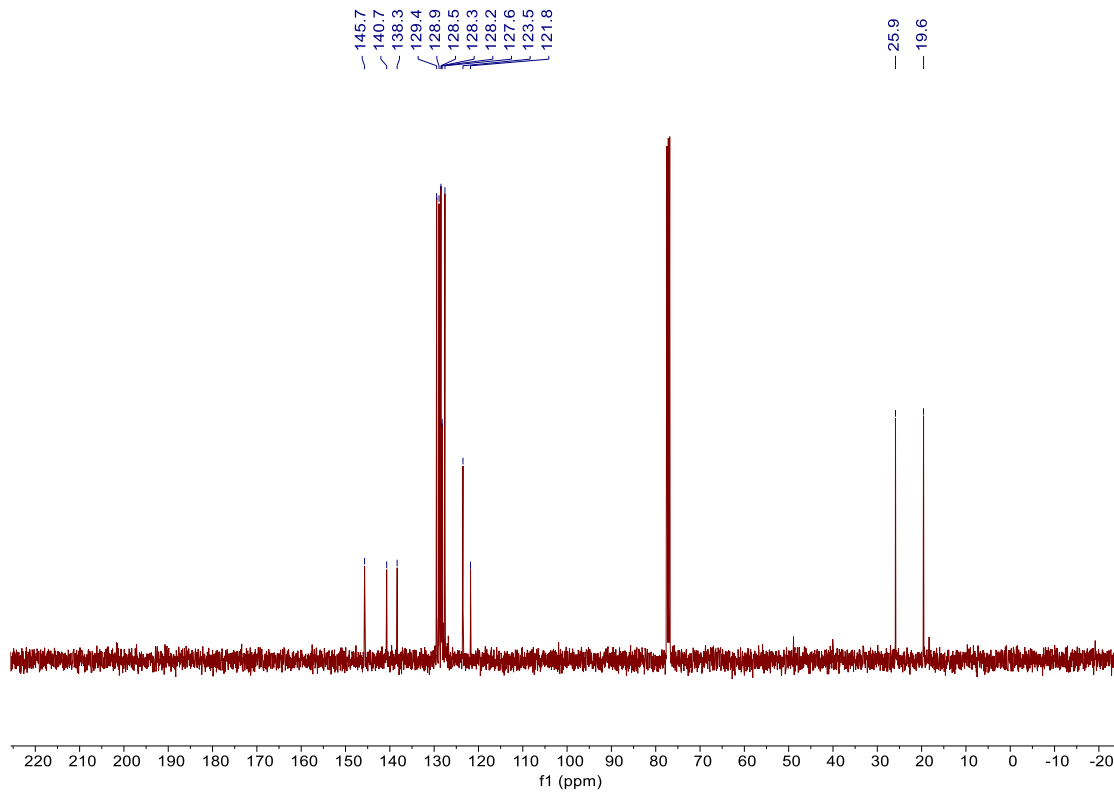

**<sup>1</sup>H NMR of 47 (400 MHz, CDCl<sub>3</sub>)**

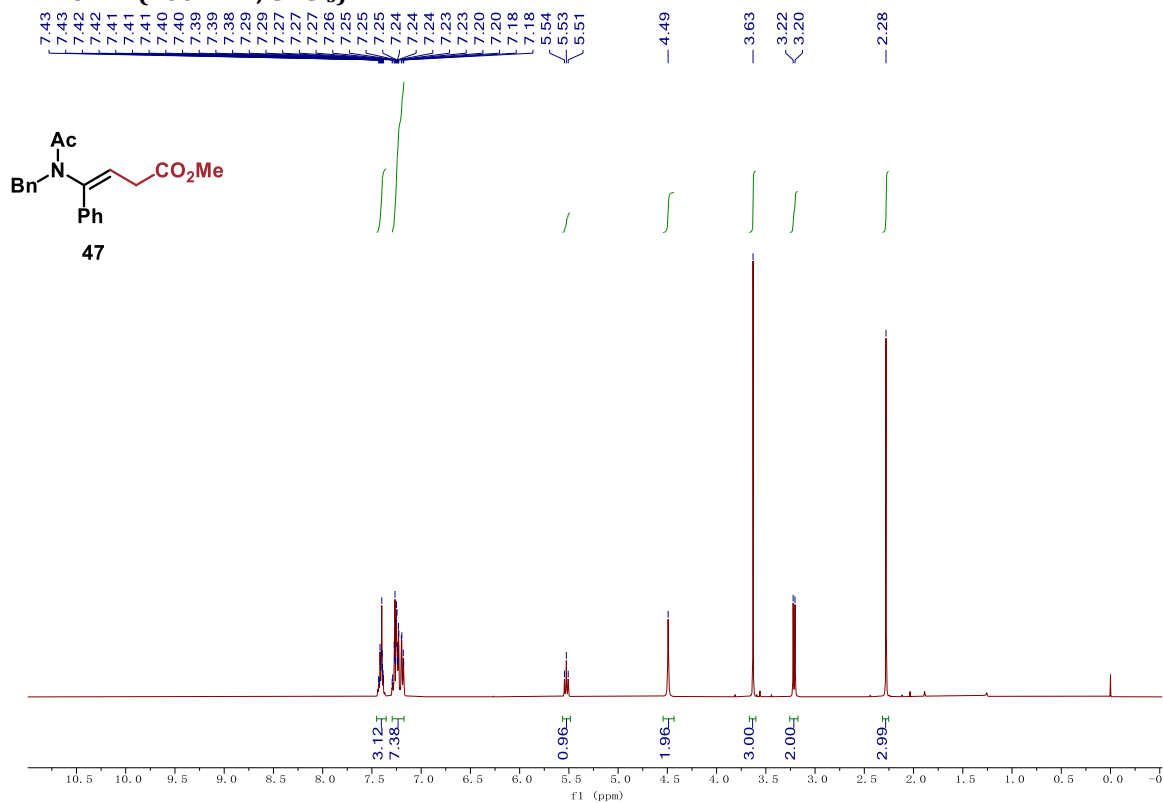

**<sup>13</sup>C NMR of 47 (101 MHz, CDCl<sub>3</sub>)**

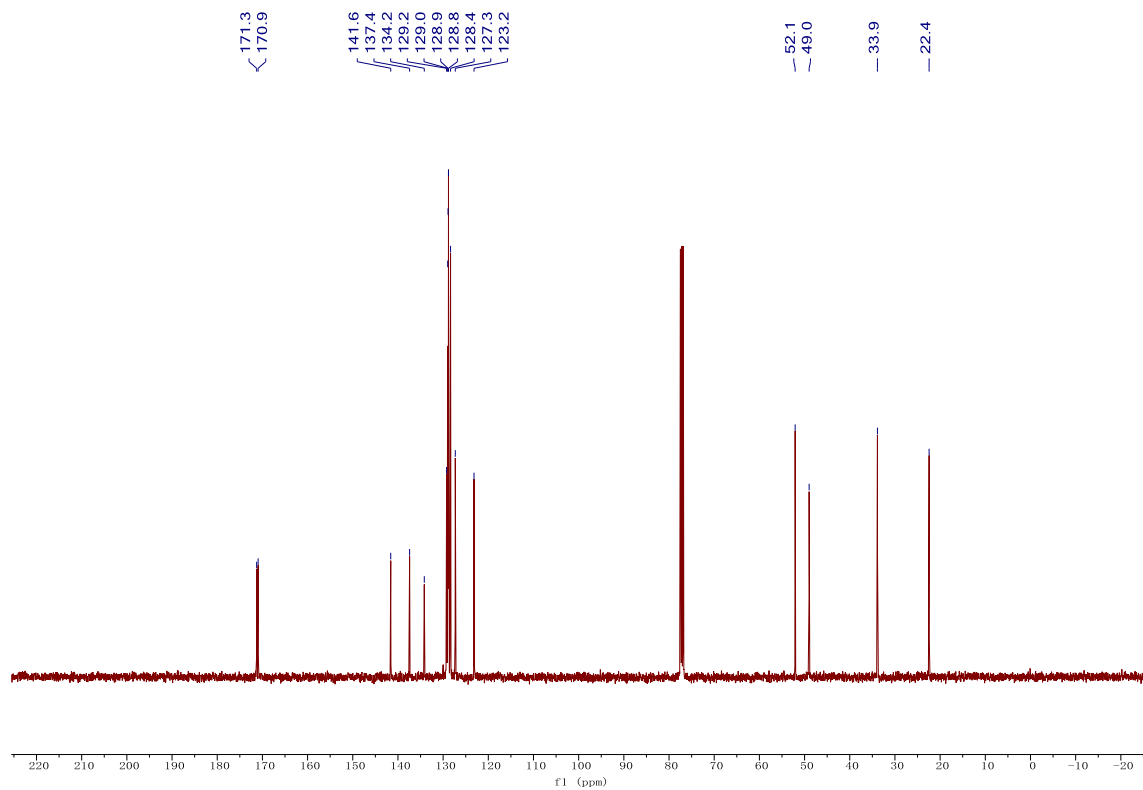

# NOESY

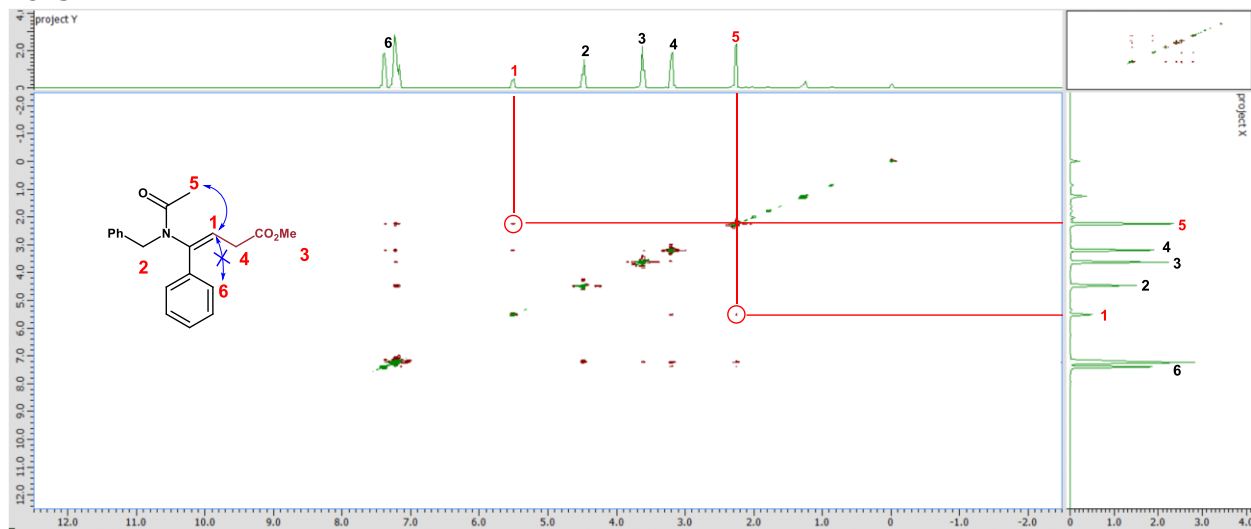

**<sup>1</sup>H NMR of 48 (500 MHz, CDCl<sub>3</sub>)**

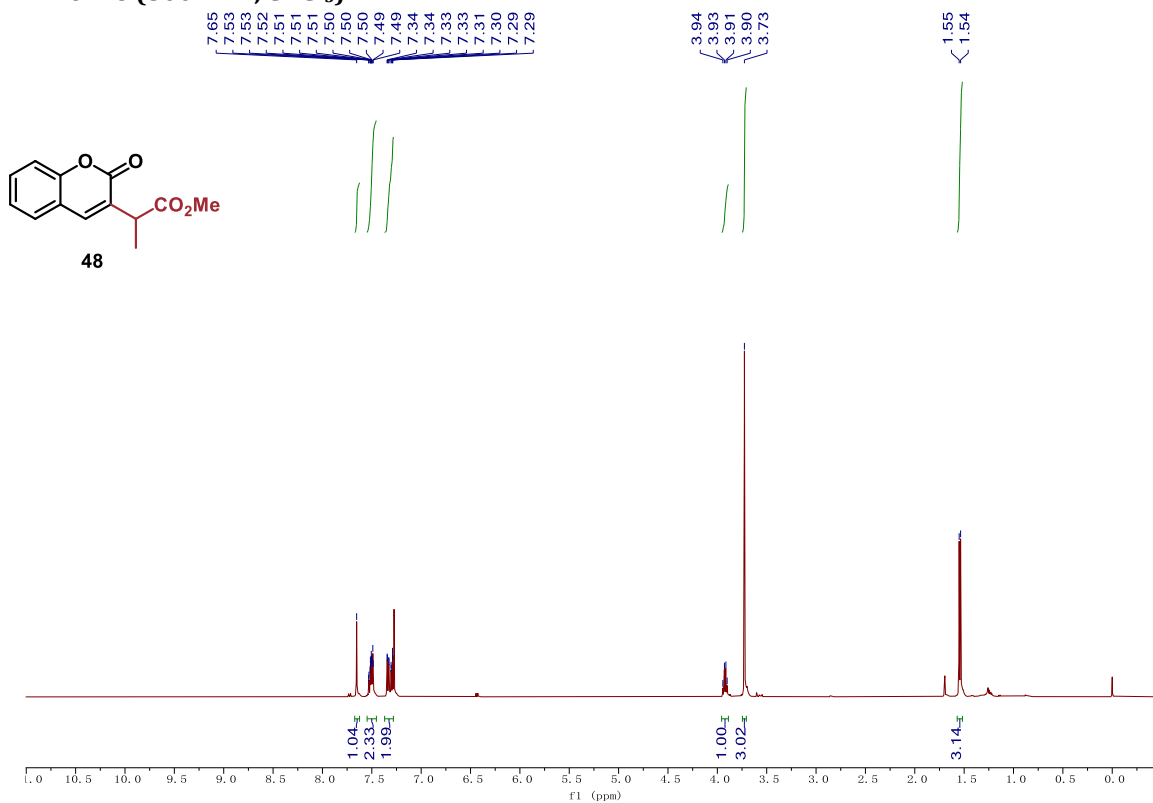

**<sup>13</sup>C NMR of 48 (101 MHz, CDCl<sub>3</sub>)**

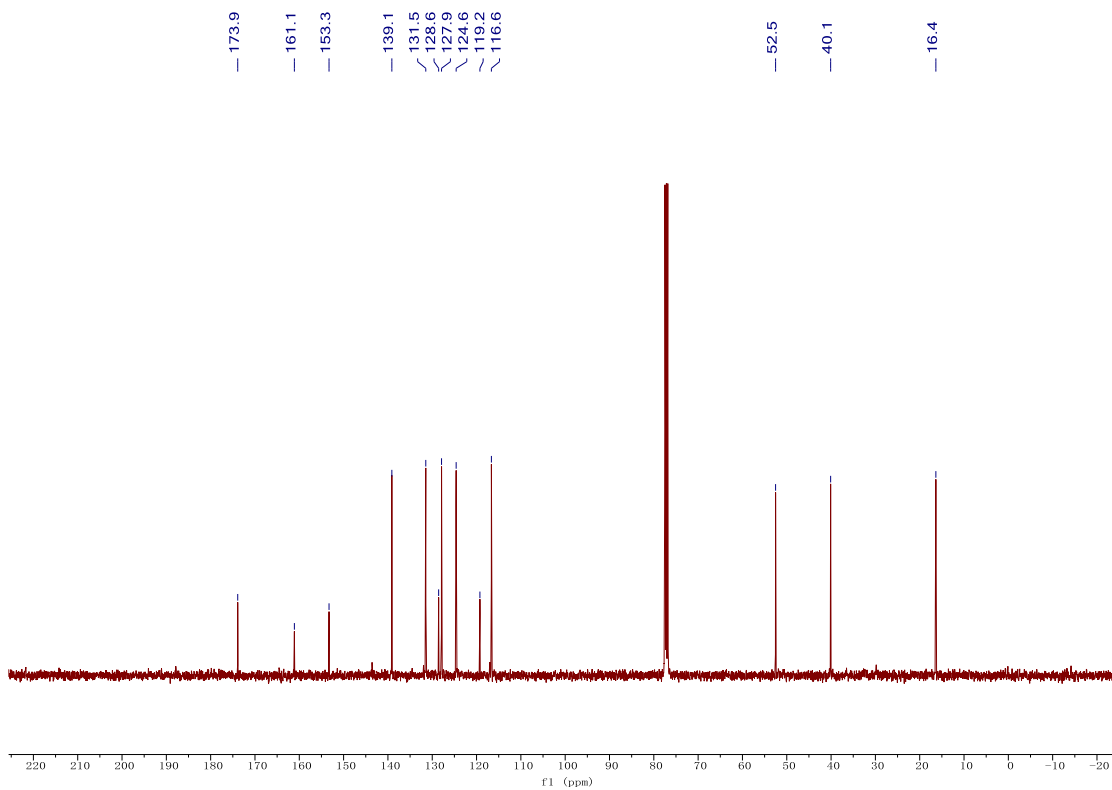

**<sup>1</sup>H NMR of 49 (500 MHz, CDCl<sub>3</sub>)**

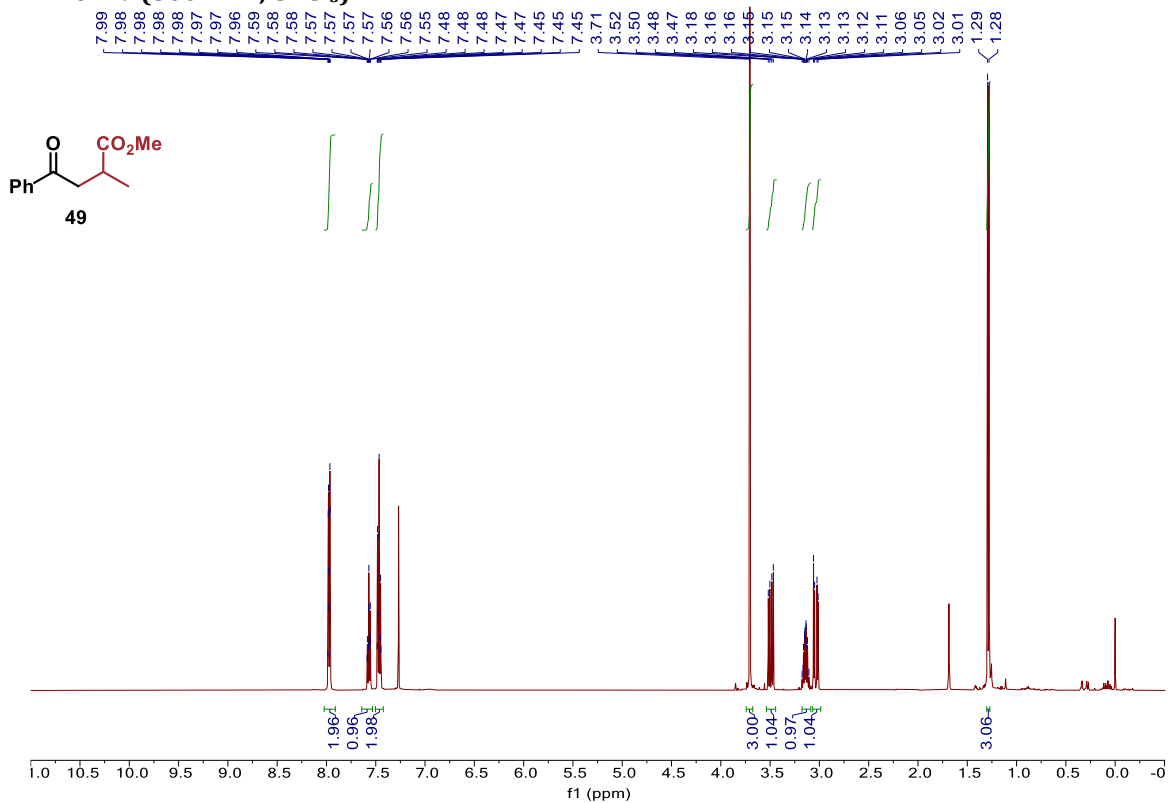

**<sup>13</sup>C NMR of 49 (126 MHz, CDCl<sub>3</sub>)**

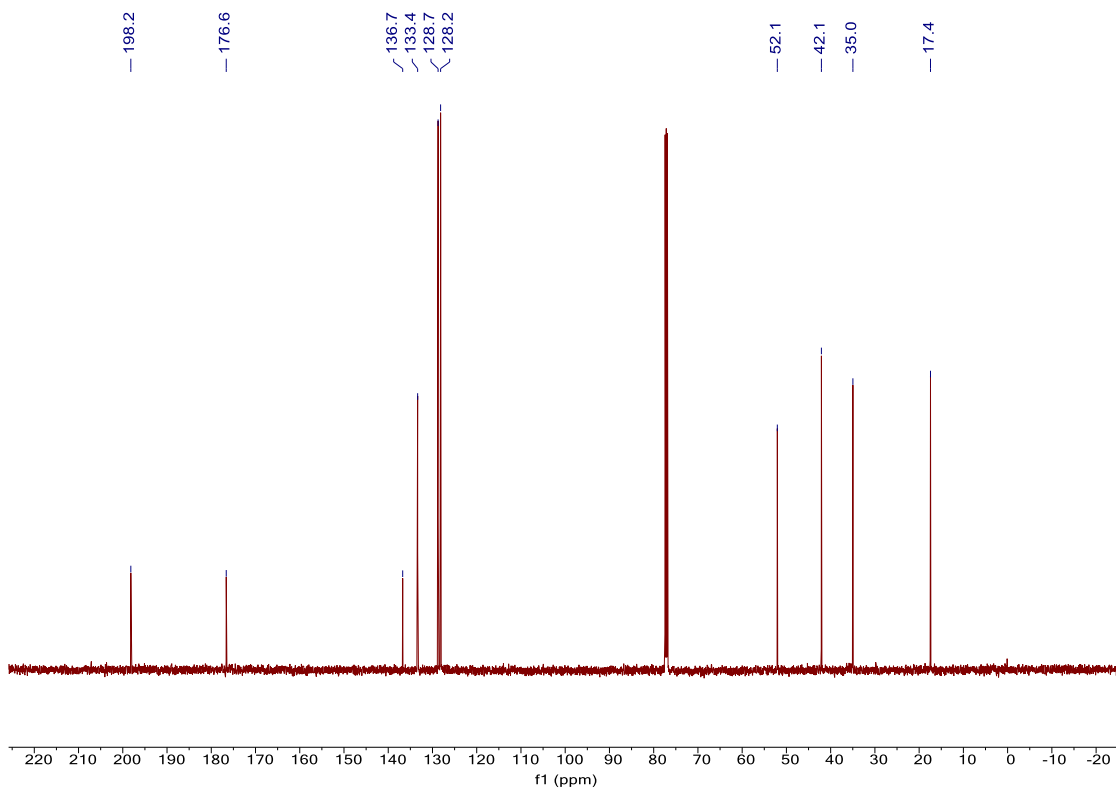



**<sup>1</sup>H NMR of 50 (500 MHz, CDCl<sub>3</sub>)**

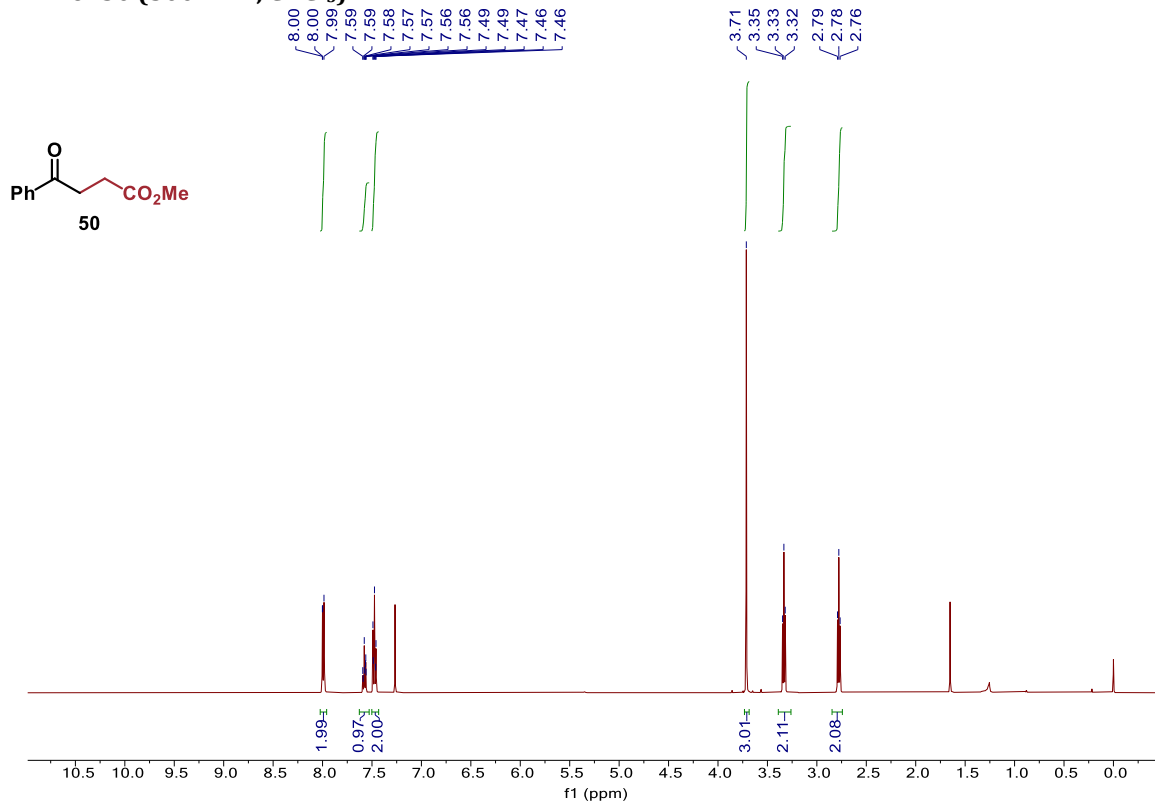

**<sup>13</sup>C NMR of 50 (126 MHz, CDCl<sub>3</sub>)**

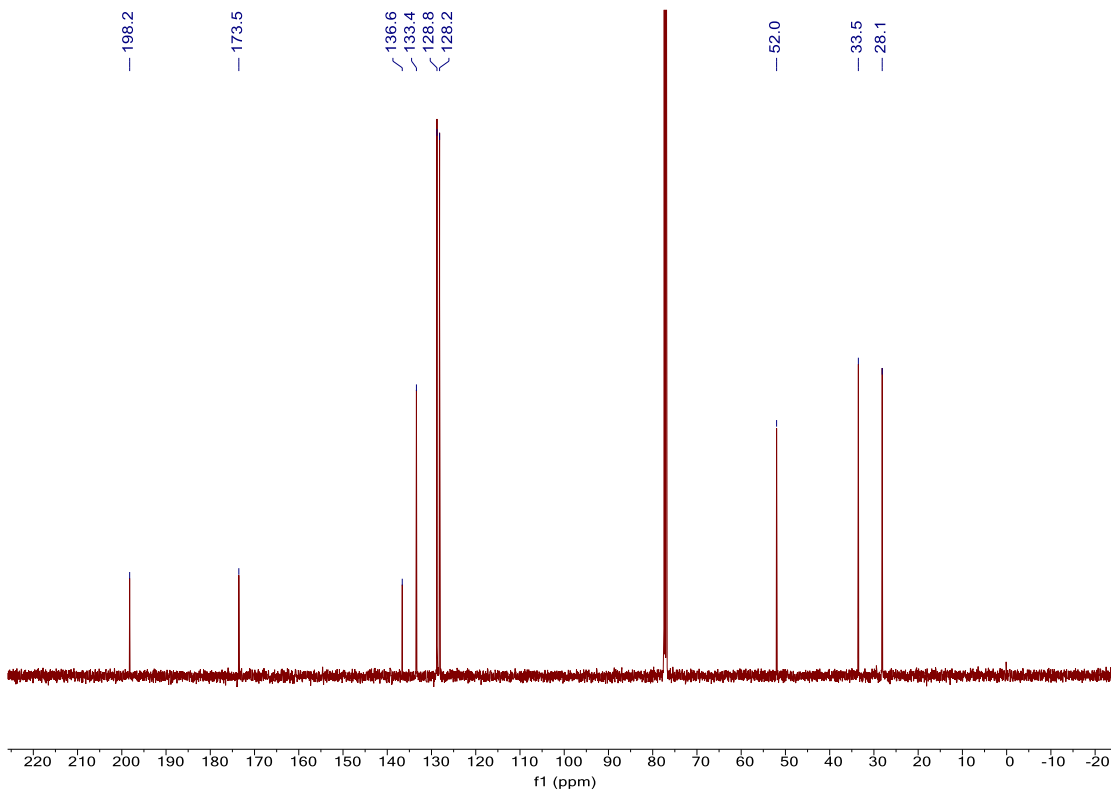

**<sup>1</sup>H NMR of 51 (400 MHz, CDCl<sub>3</sub>)**

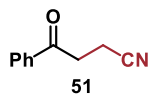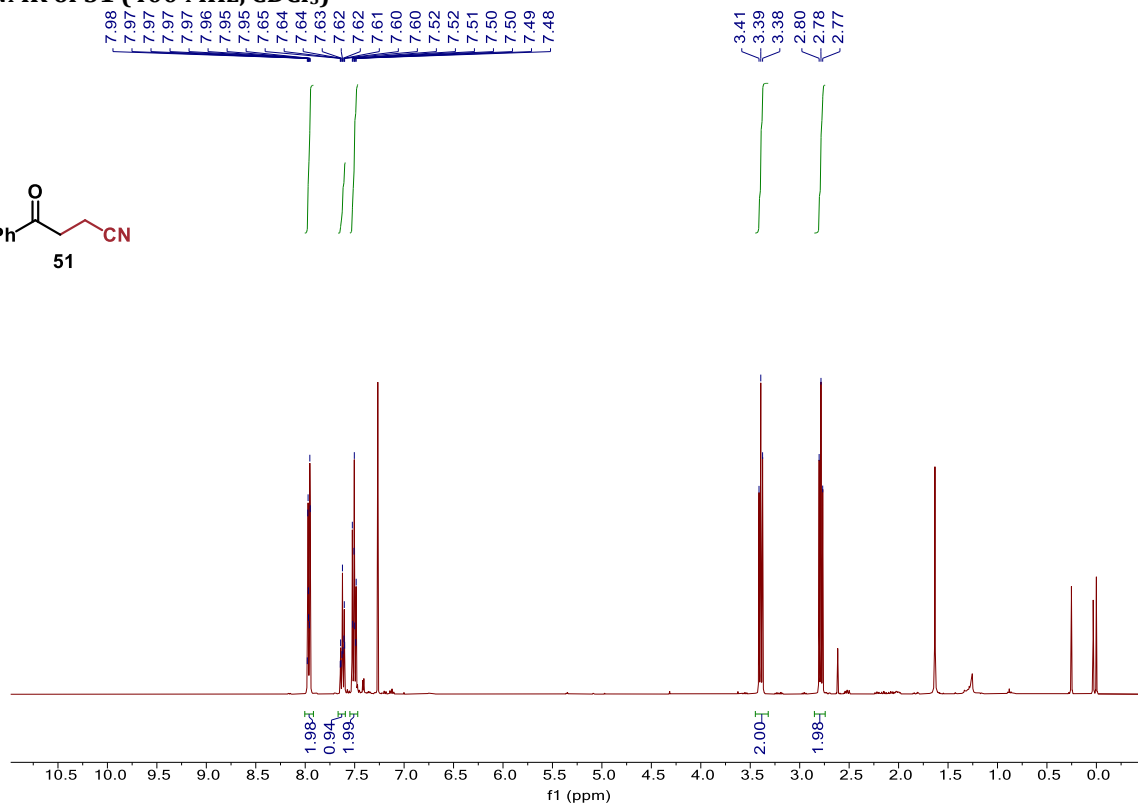

**<sup>13</sup>C NMR of 51 (101 MHz, CDCl<sub>3</sub>)**

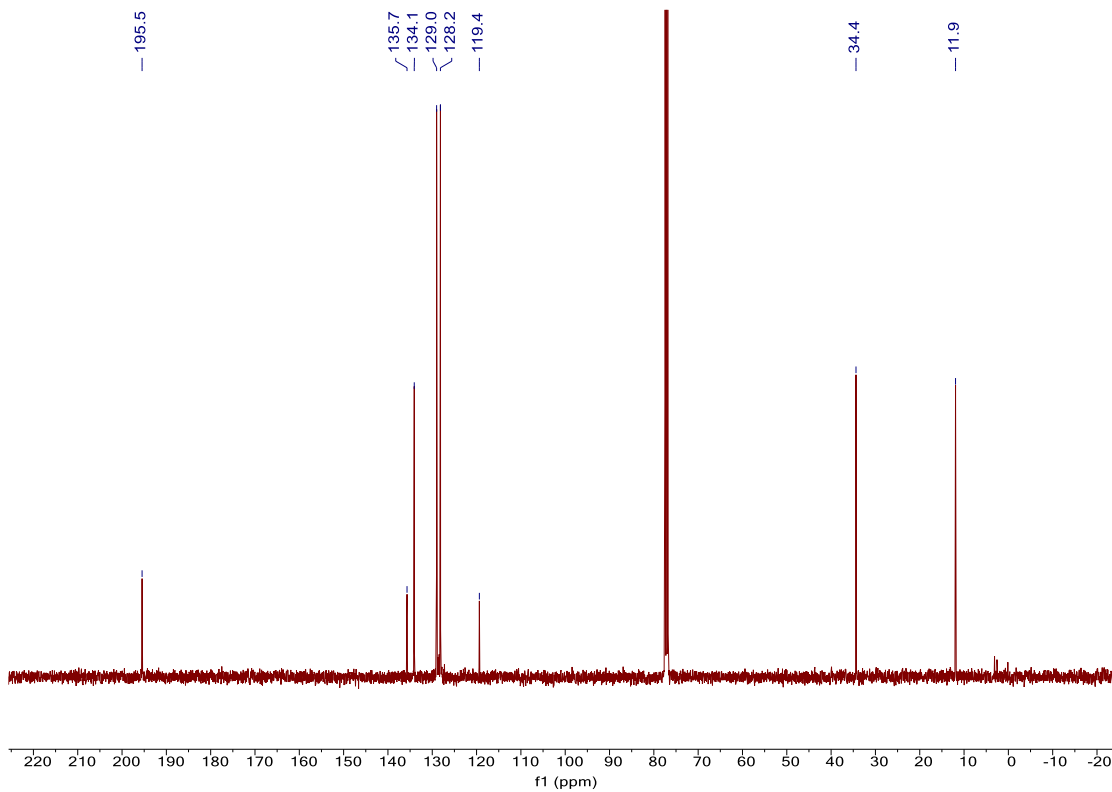

**<sup>1</sup>H NMR of 52 (400 MHz, CDCl<sub>3</sub>)**

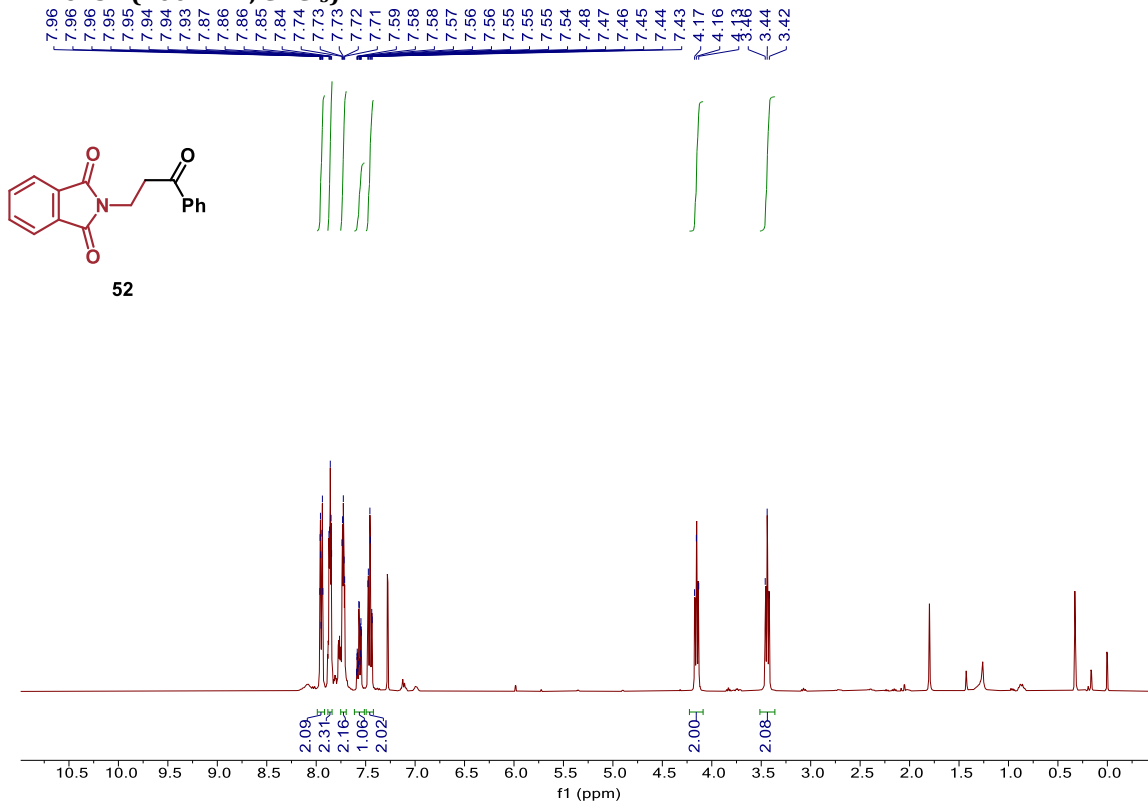

**<sup>13</sup>C NMR of 52 (101 MHz, CDCl<sub>3</sub>)**

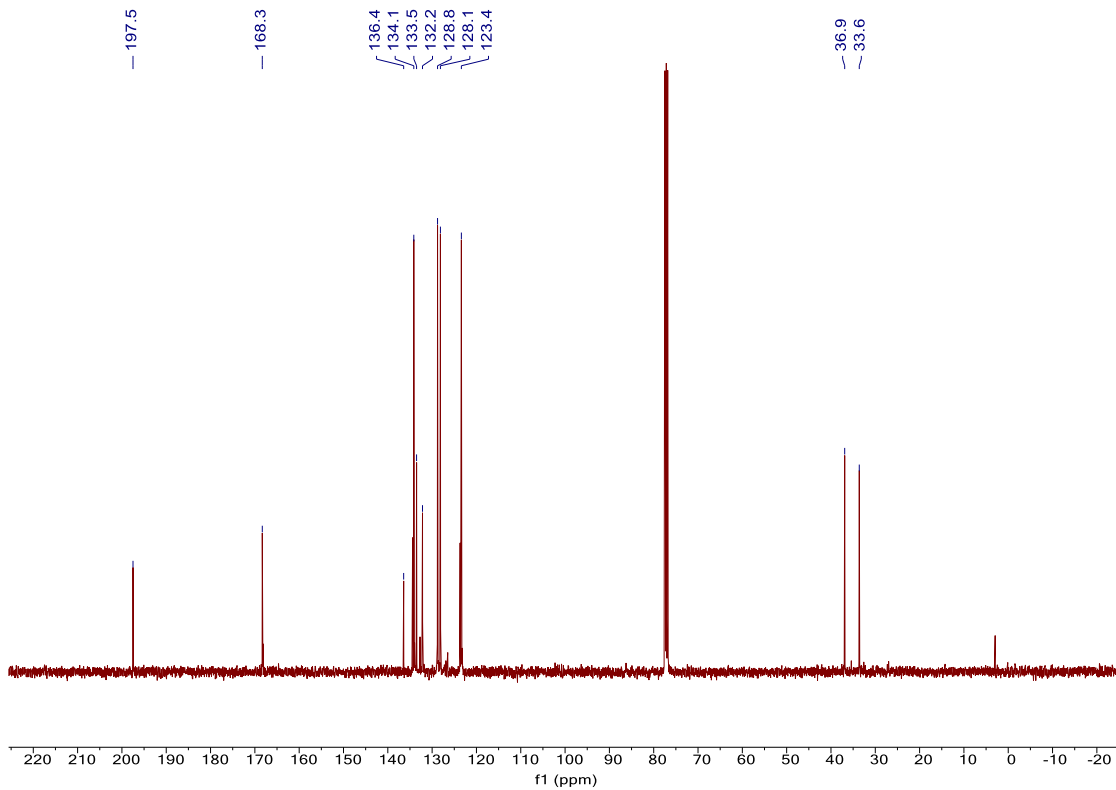

**<sup>1</sup>H NMR of 53 (400 MHz, CDCl<sub>3</sub>)**

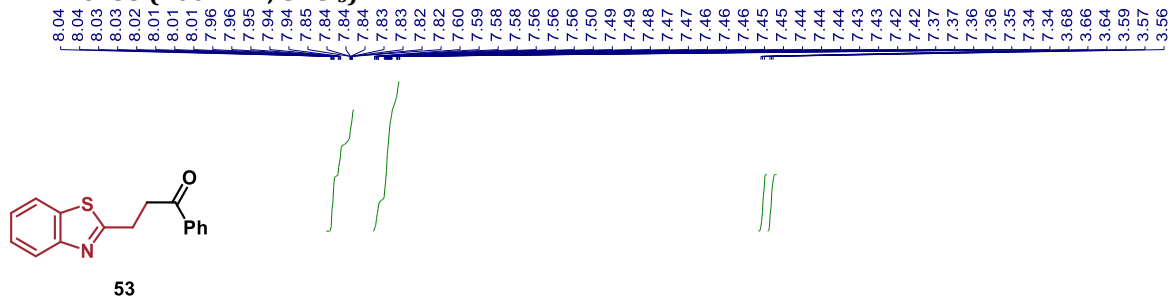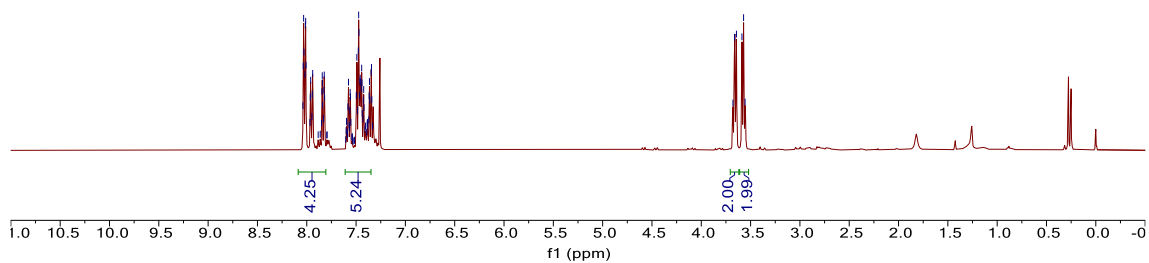

**<sup>13</sup>C NMR of 53 (101 MHz, CDCl<sub>3</sub>)**

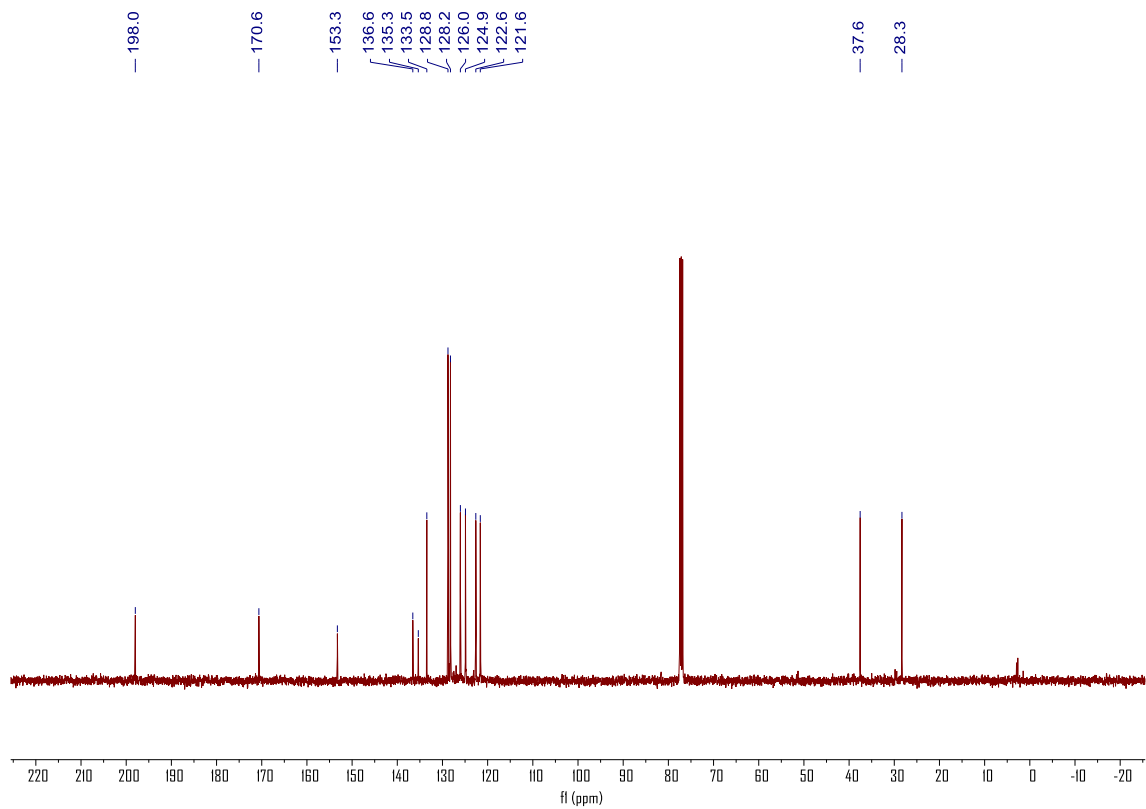

**<sup>1</sup>H NMR of 54 (500 MHz, CDCl<sub>3</sub>)**

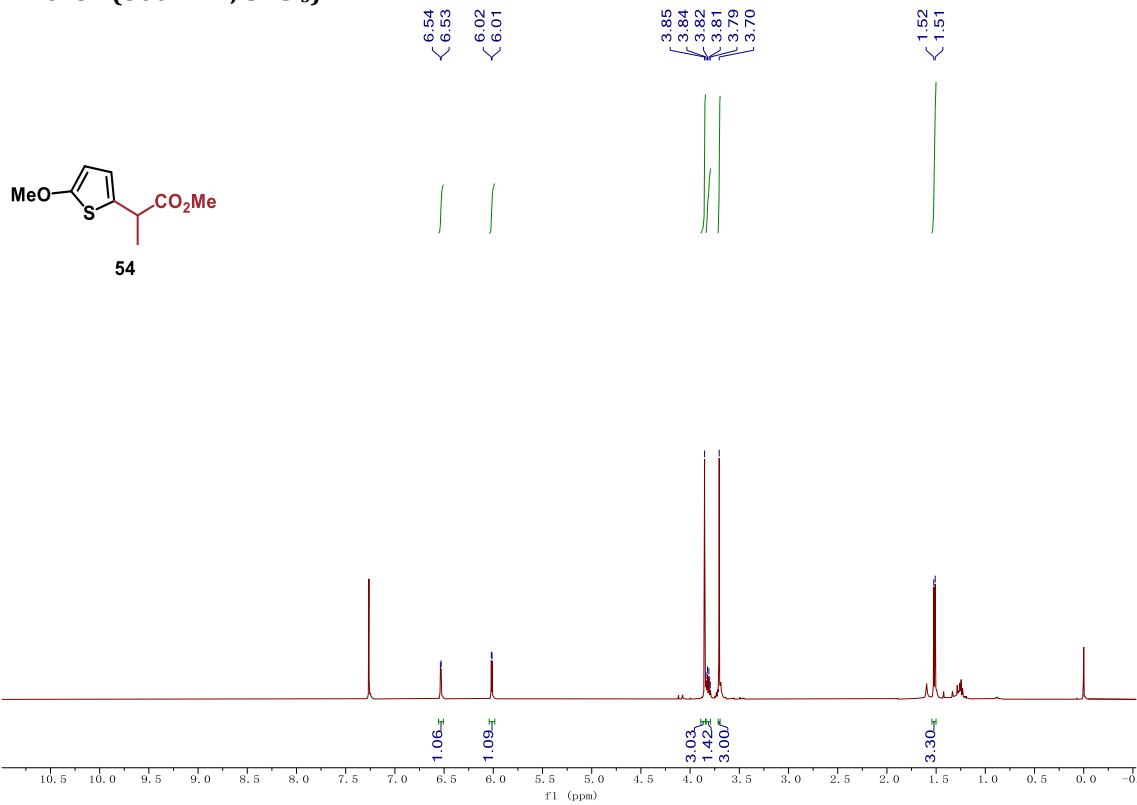

**<sup>13</sup>C NMR of 54 (126 MHz, CDCl<sub>3</sub>)**

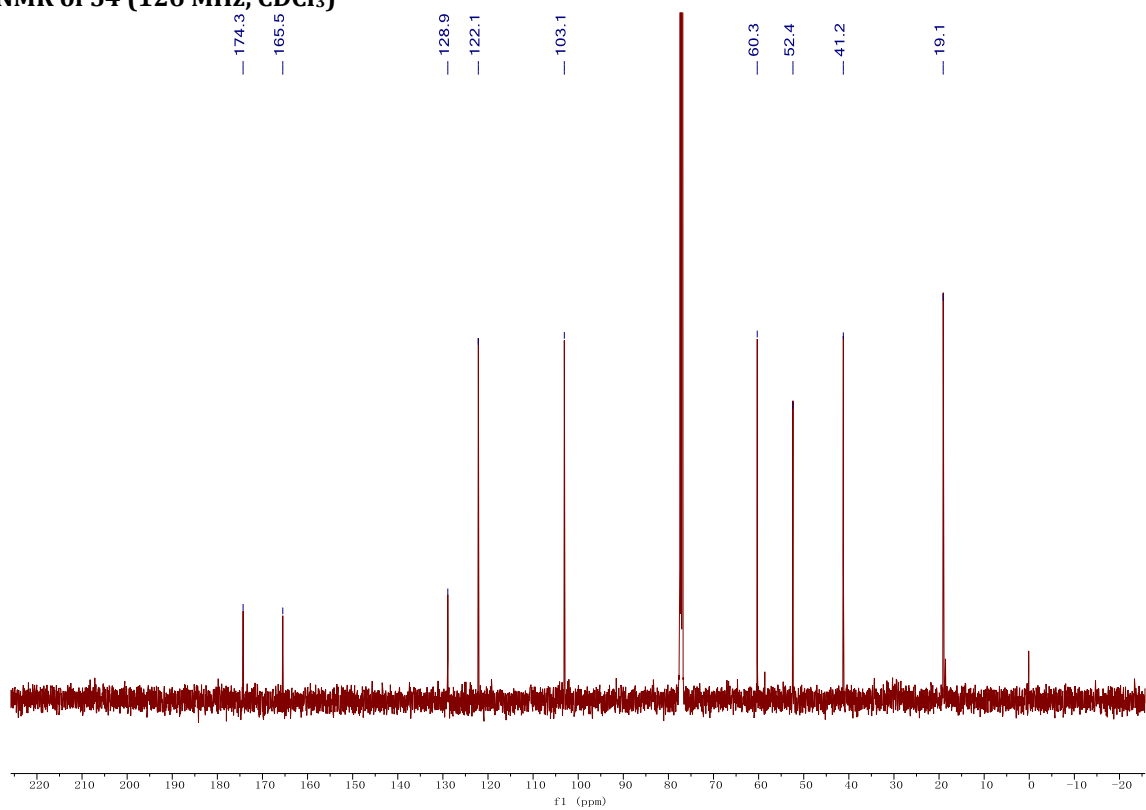

**<sup>1</sup>H NMR of 55 (500 MHz, CDCl<sub>3</sub>)**

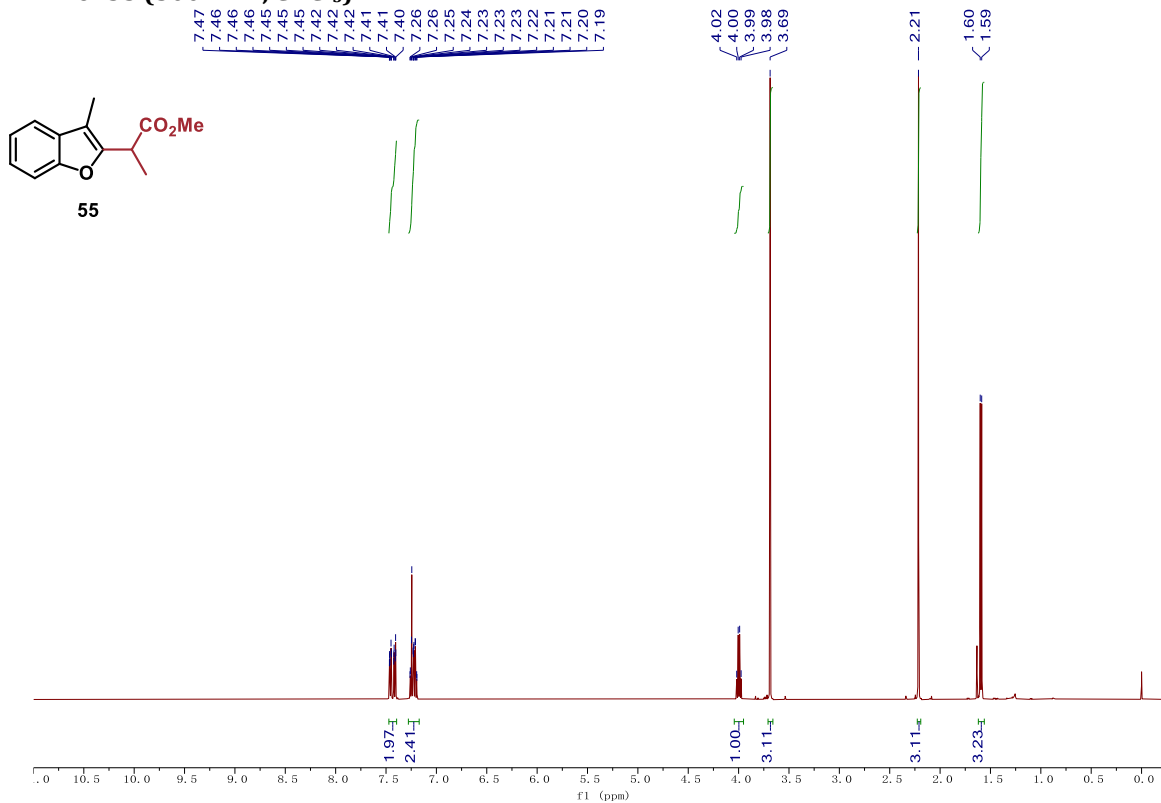

**<sup>13</sup>C NMR of 55 (126 MHz, CDCl<sub>3</sub>)**

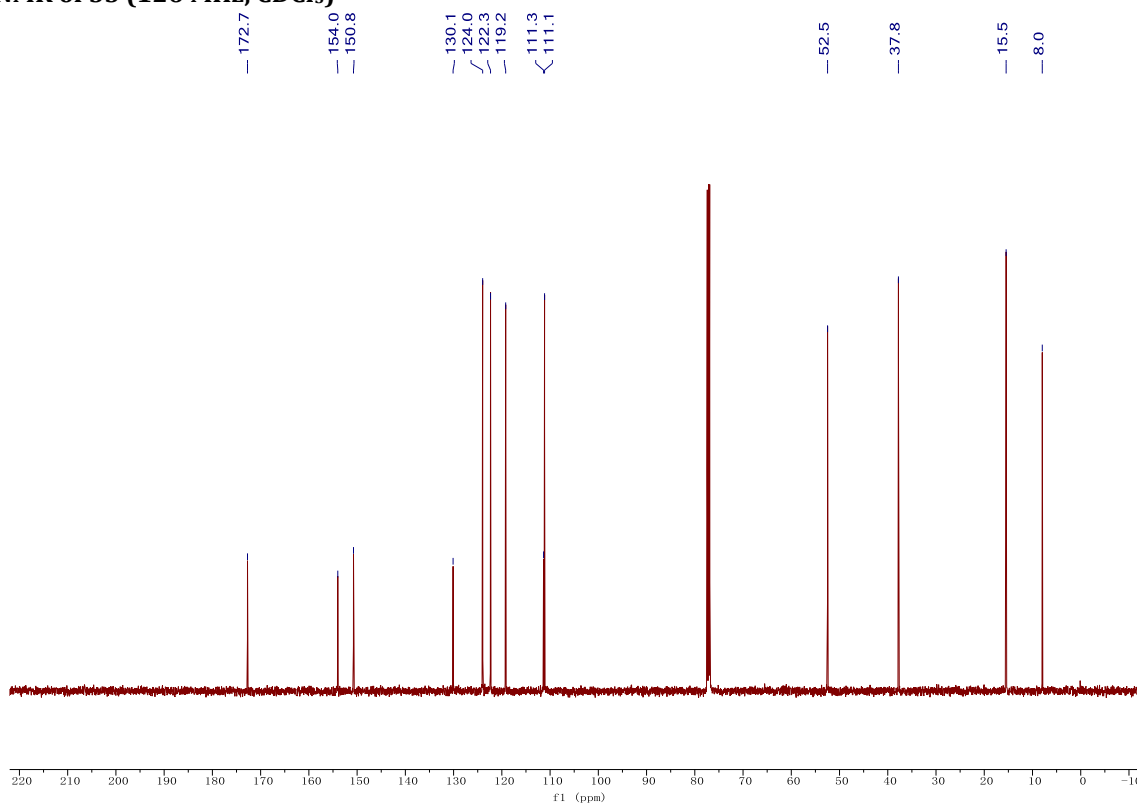

**<sup>1</sup>H NMR of 56 (500 MHz, CDCl<sub>3</sub>)**

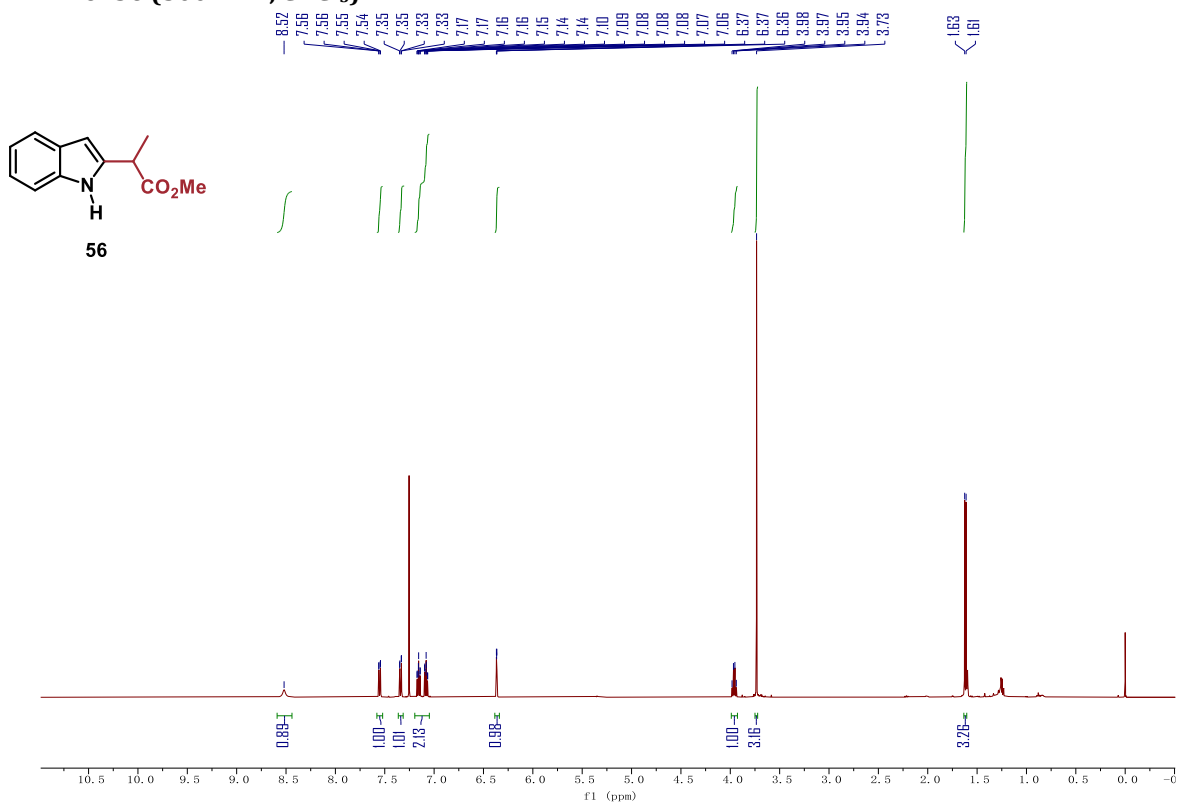

**<sup>13</sup>C NMR of 56 (126 MHz, CDCl<sub>3</sub>)**

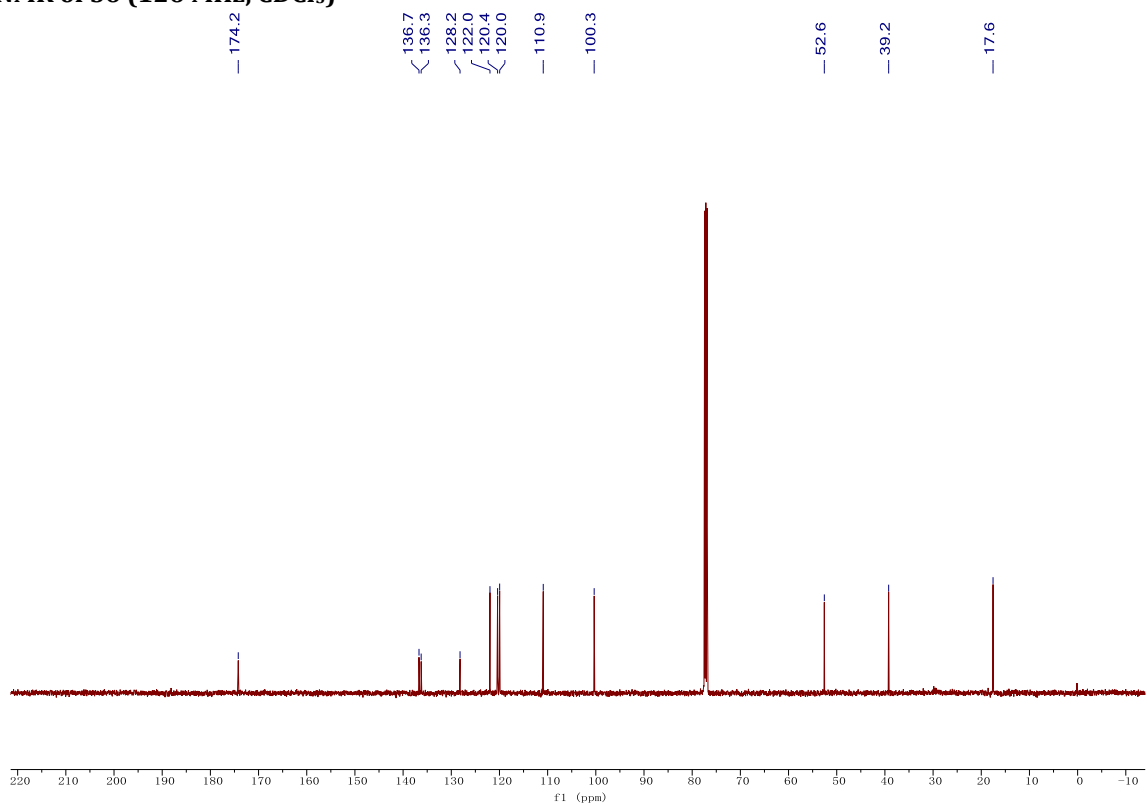

**<sup>1</sup>H NMR of 57 (500 MHz, CDCl<sub>3</sub>)**

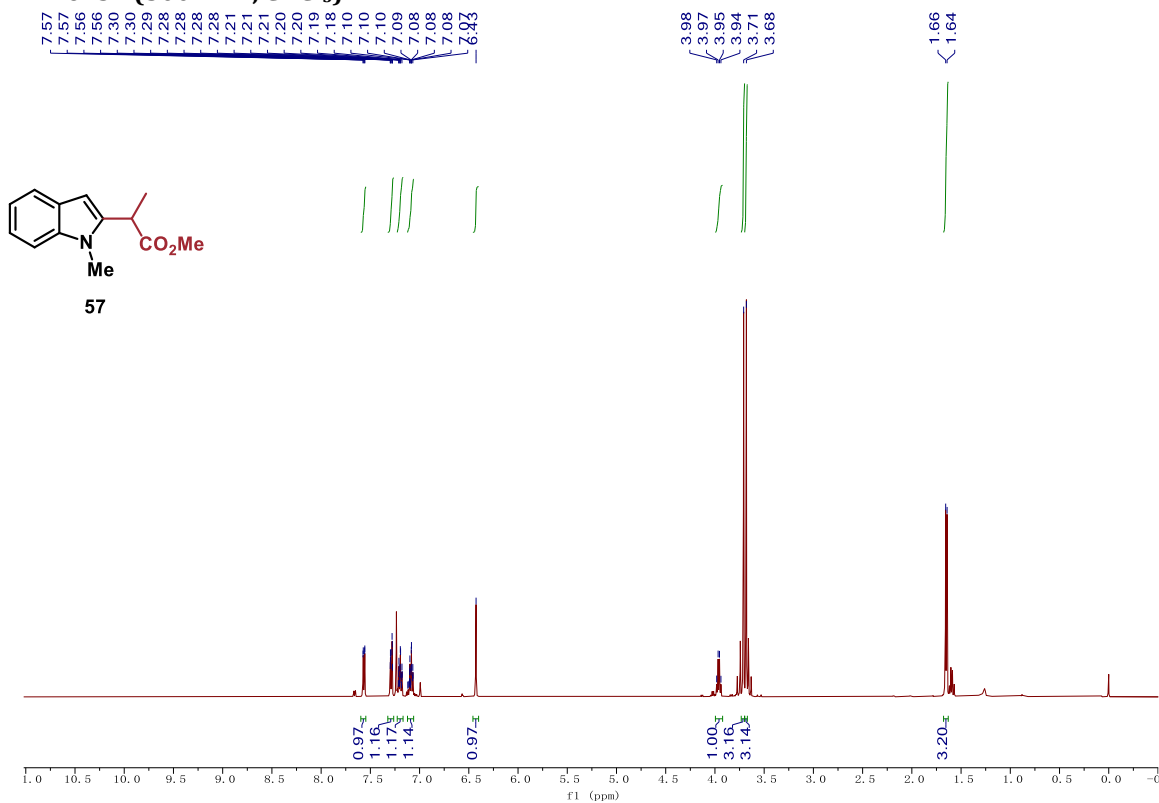

**<sup>13</sup>C NMR of 57 (101 MHz, CDCl<sub>3</sub>)**

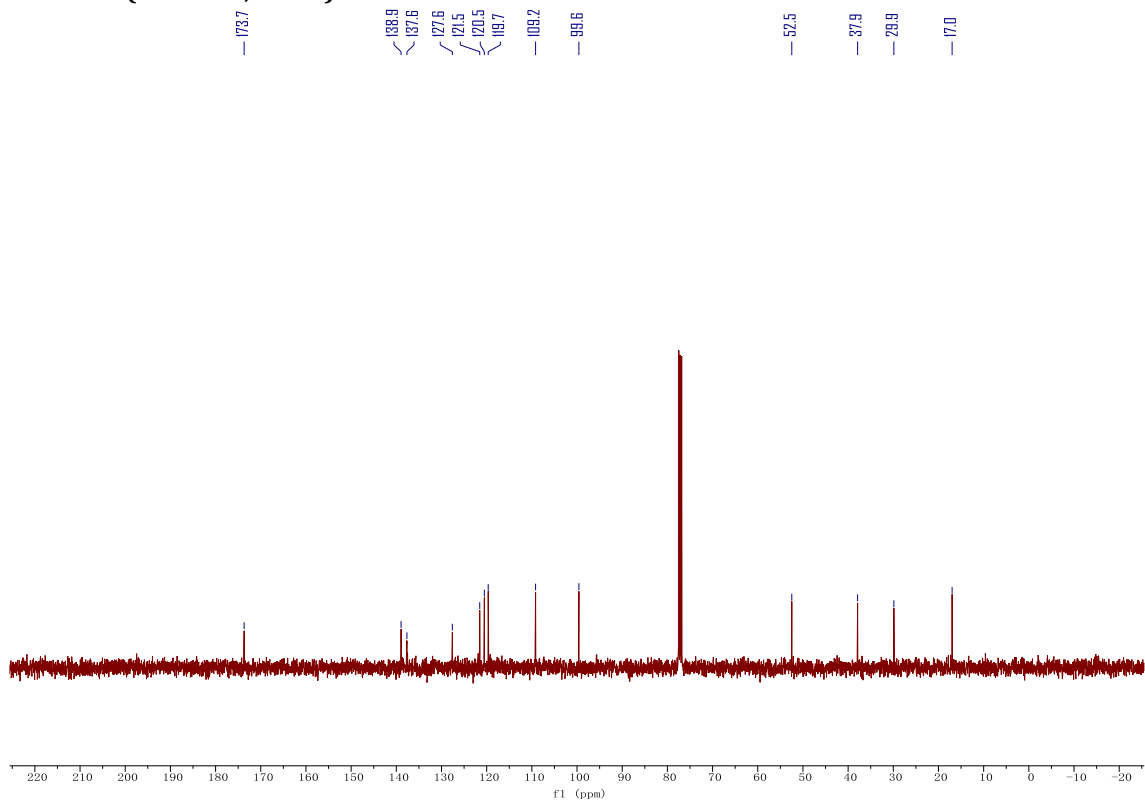



**<sup>1</sup>H NMR of 58 (500 MHz, CDCl<sub>3</sub>)**

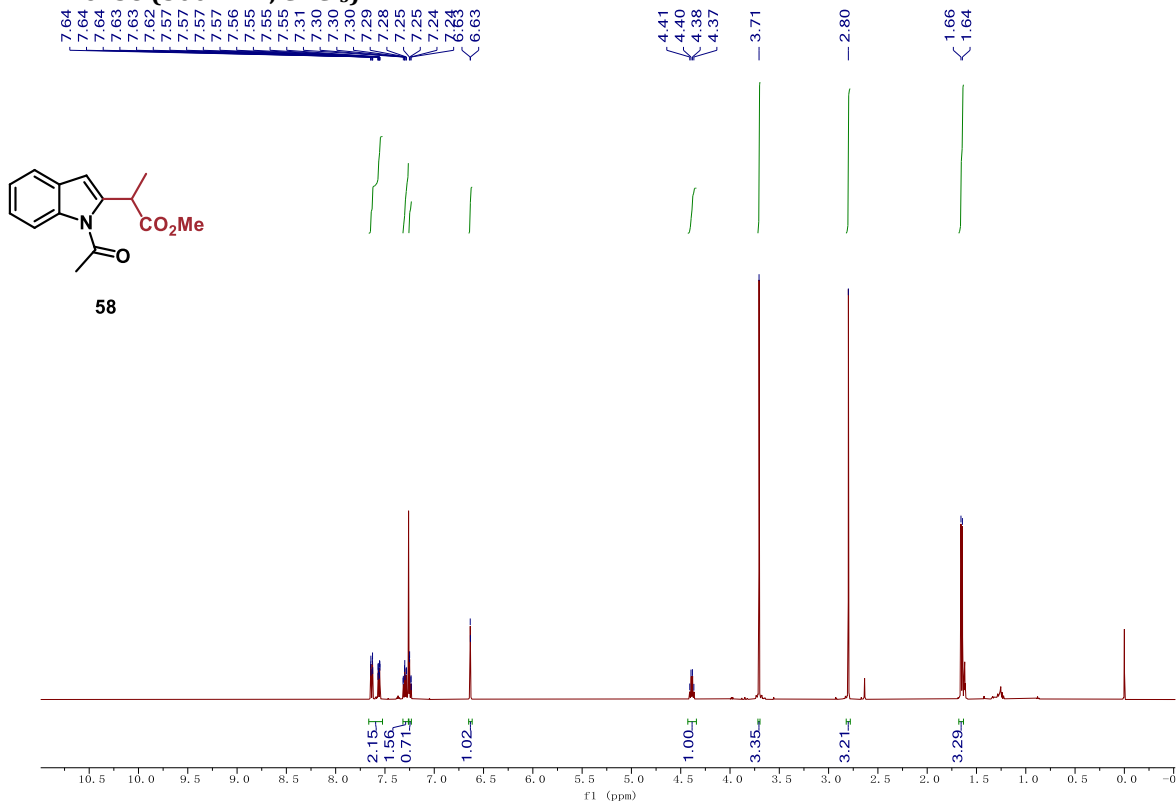

**<sup>13</sup>C NMR of 58 (126 MHz, CDCl<sub>3</sub>)**

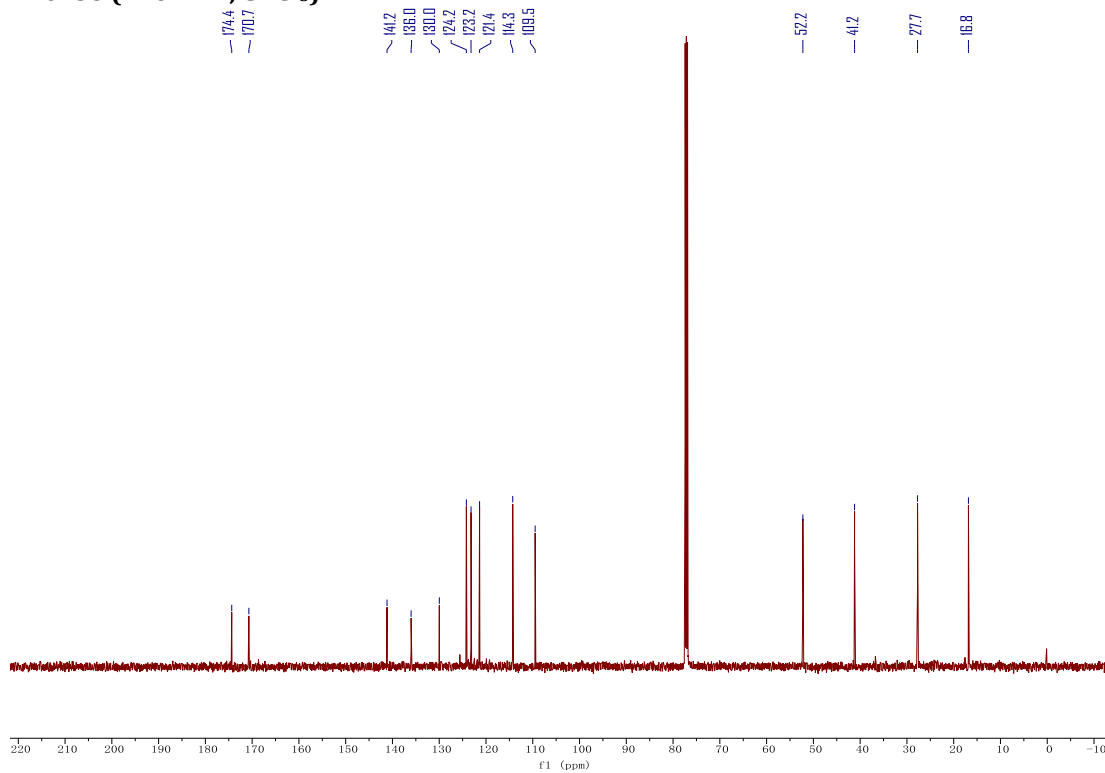

**<sup>1</sup>H NMR of 59 (500 MHz, CDCl<sub>3</sub>)**

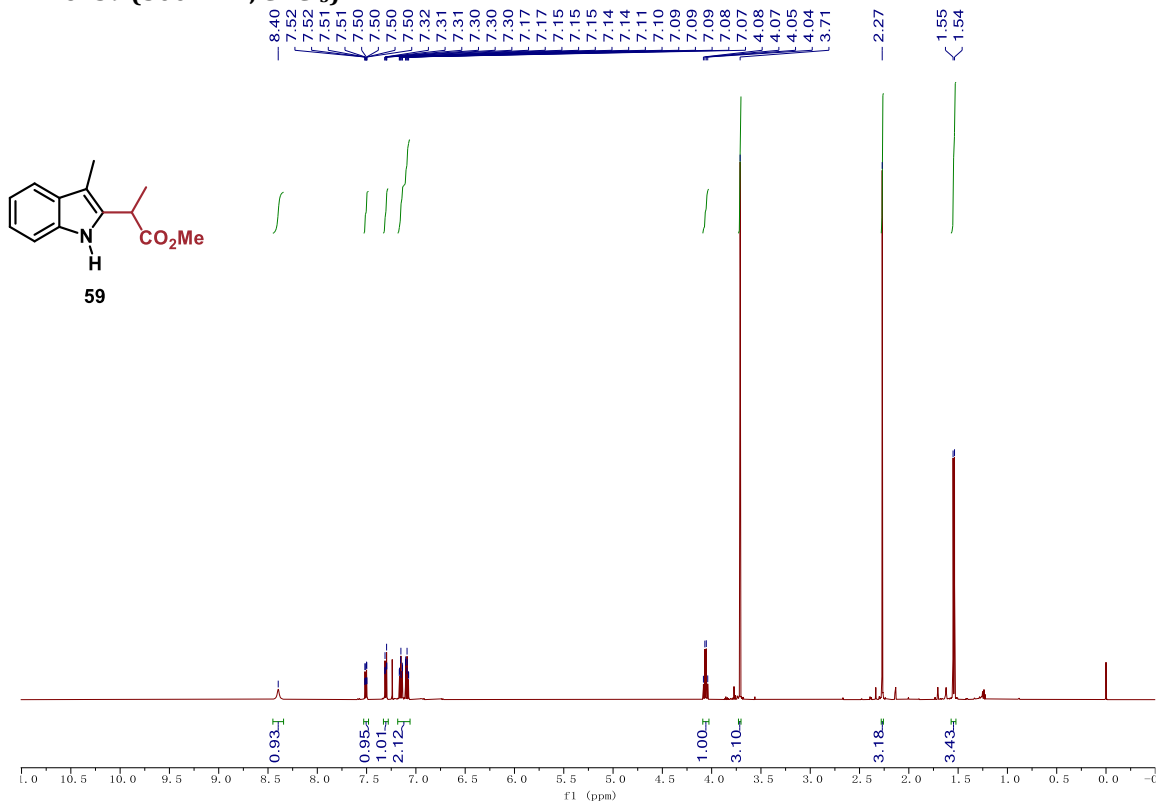

**<sup>13</sup>C NMR of 59 (126 MHz, CDCl<sub>3</sub>)**

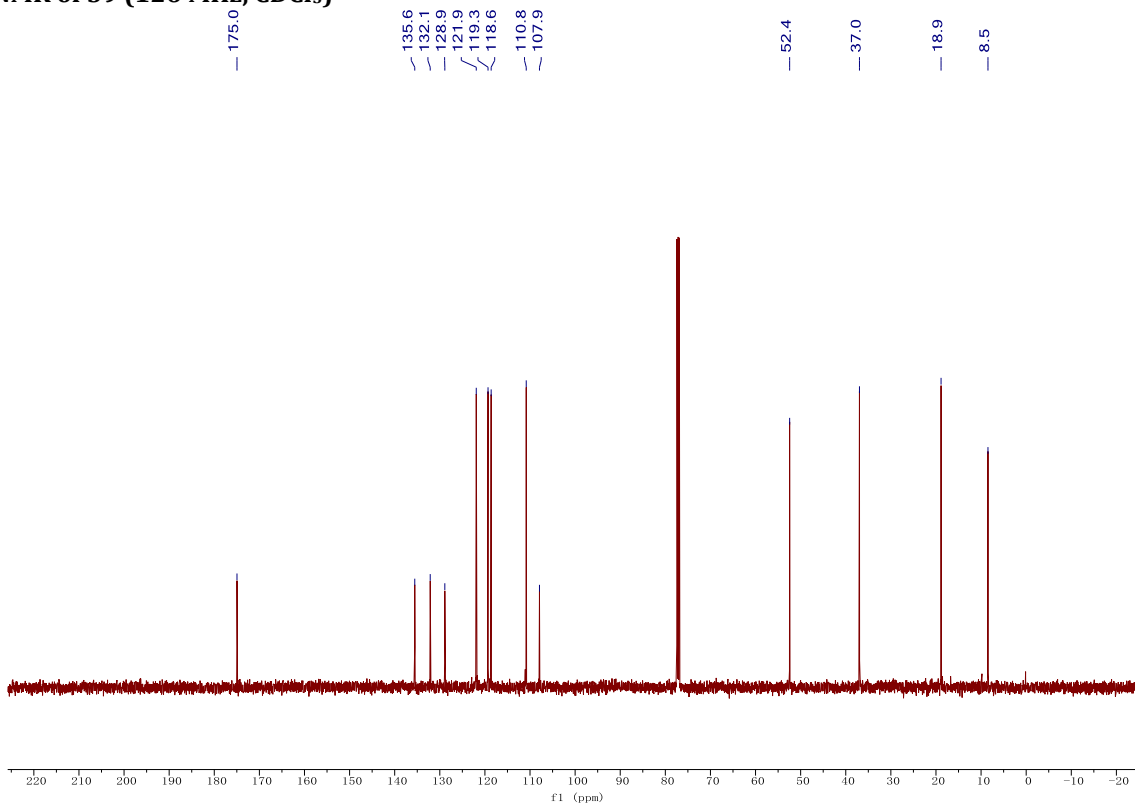

**<sup>1</sup>H NMR of 60 (500 MHz, CDCl<sub>3</sub>)**

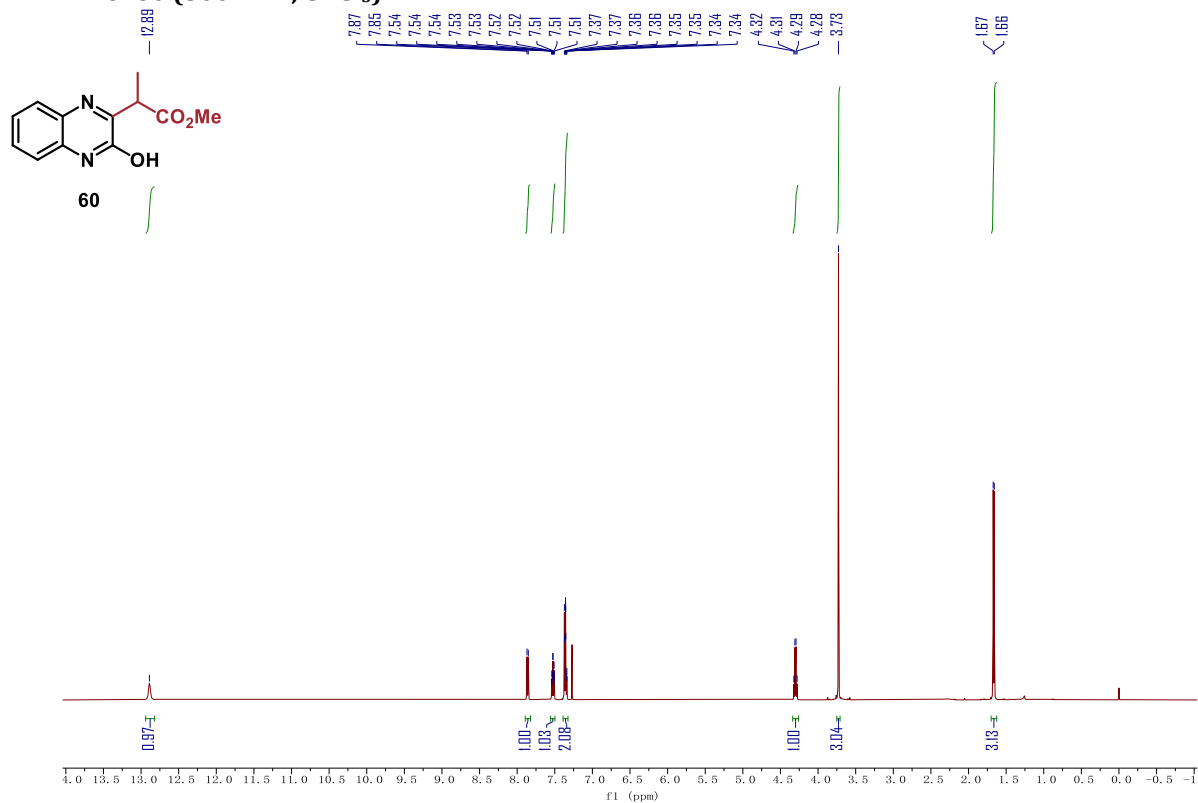

**<sup>13</sup>C NMR of 60 (126 MHz, CDCl<sub>3</sub>)**

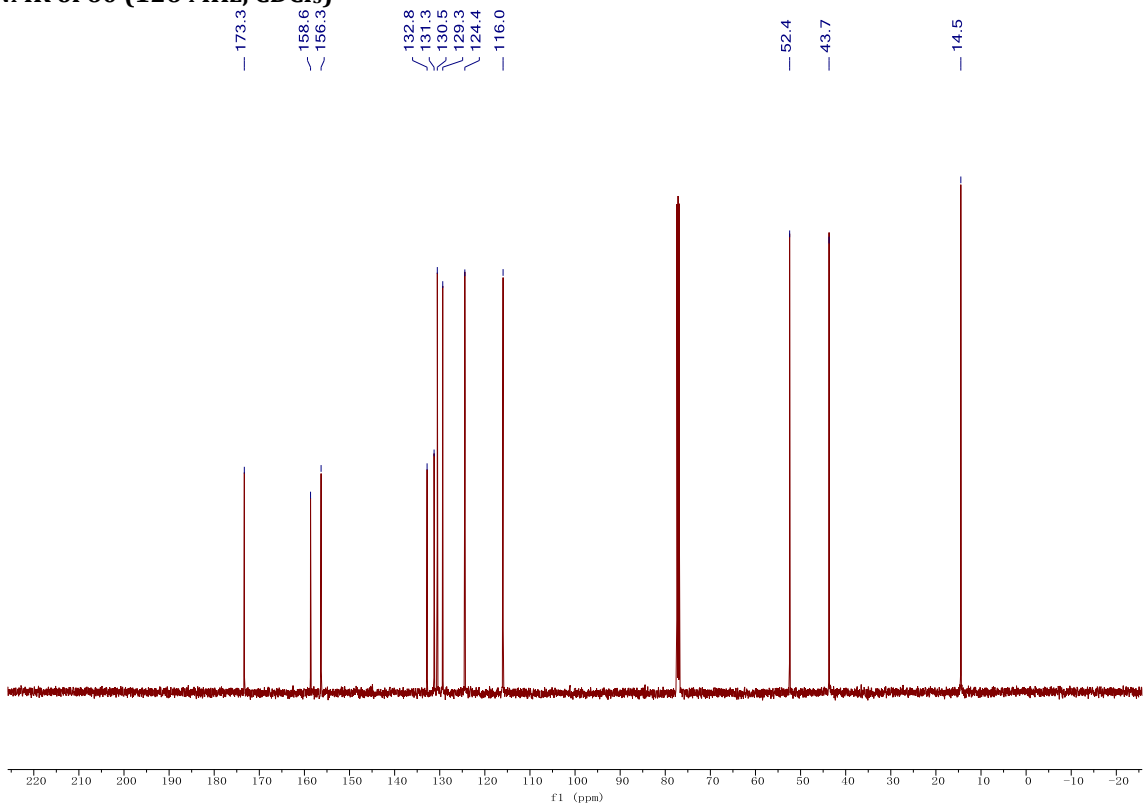

**<sup>1</sup>H NMR of 61 (500 MHz, CDCl<sub>3</sub>)**

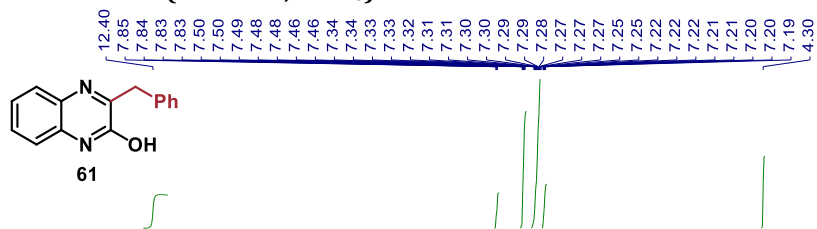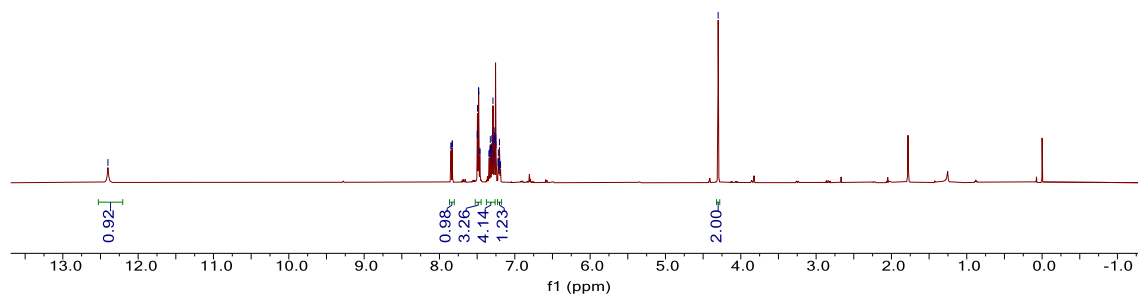

**<sup>13</sup>C NMR of 61 (126 MHz, CDCl<sub>3</sub>)**

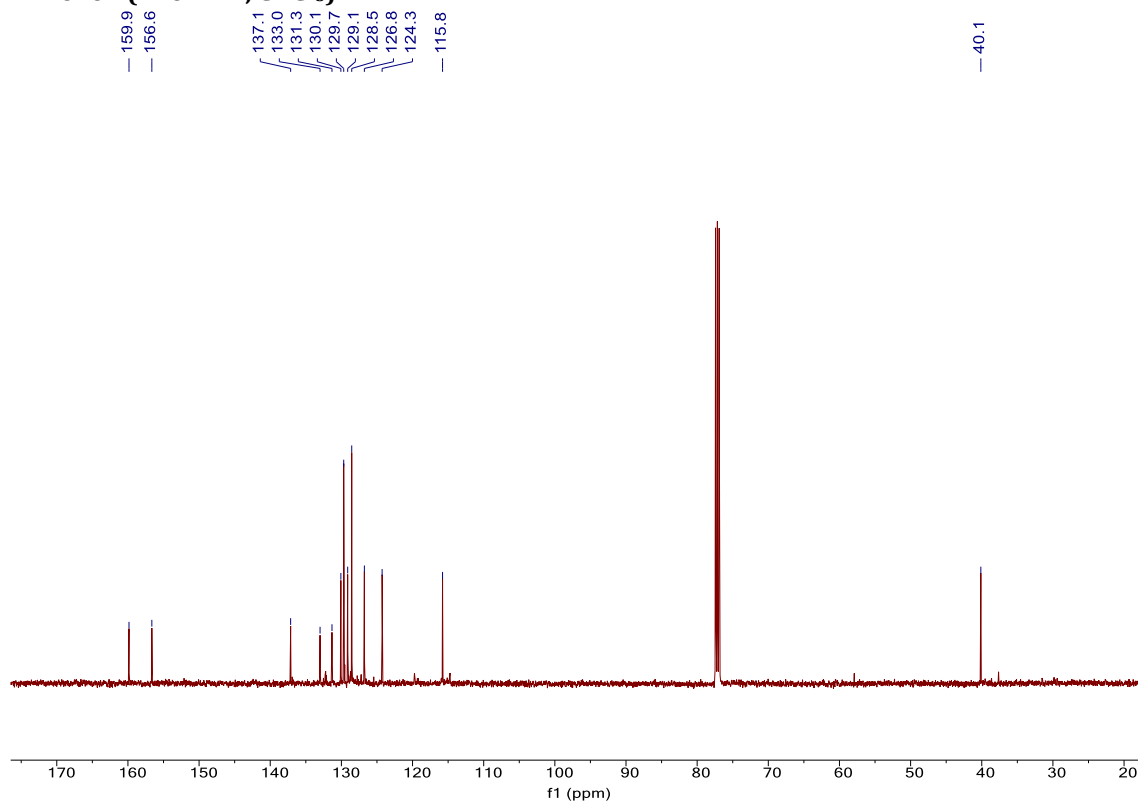

## 15. Computational Details

Considering that acetonitrile ( $\text{CH}_3\text{CN}$ ,  $\epsilon = 35.7$ ) is a strongly polar solvent, all structures were optimized and characterized in acetonitrile with the SMD<sup>21</sup> solvent model (SCRF=SMD) at B3LYP<sup>22-24</sup>-D3BJ<sup>25</sup>/BSI level, BSI representing a basis set with SDD<sup>26-27</sup> for I and 6-31G(d,p) for other atoms. Harmonic frequency analysis calculations at the same level were performed to verify the optimized geometries to be minima (no imaginary frequency) or transition states (TSs, having unique one imaginary frequency). The energies were further improved by M06<sup>29-31</sup>/BSII//B3LYP-D3BJ/BSI single-point calculations with solvent effects accounted by the SMD solvent model, using the experimental solvent (acetonitrile), BSII denotes a basis set with SDD for I and 6-311++G(d,p) for other atoms. The vertical excitation energies of <sup>1</sup>CT complexes were calculated at TD<sup>32-35</sup>-M06/BSII. When necessary, intrinsic reaction coordinate (IRC) calculations<sup>36</sup> were carried out at the B3LYP-D3BJ/BSI level to verify a TS correctly connecting with its nearby minima. To account for the overestimation of the entropy contributions estimated by the idea gas phase model for the solution system, which has been experimentally demonstrated<sup>37,38</sup>, a correction factor of -1.9(or 1.9) kcal mol<sup>-1</sup> for a 2:1 (or 1:2) process was applied to adjust 1atm to 1M standard state concentration<sup>39-42</sup>. Corrected free energies are discussed in the main text. All DFT and TD-DFT calculations were carried out using Gaussian 09 program<sup>43</sup>. Selected computed structures are illustrated using the CYLview<sup>44</sup>.

On the basis of Marcus theory<sup>45,46</sup>, the barriers for the outer-sphere single electron transfer (SET) were estimated by using the following equation:

$$\Delta G^\ddagger = \frac{(\Delta G + \lambda)^2}{4\lambda}$$

where  $\Delta G$  is the reaction free energy for the SET process and  $\lambda$  is the reorganization energy of nuclei and solvent molecules. For the cross-reaction, the  $\lambda$  is estimated by using the average of those for the self-exchange reaction of acceptor and donor. The reorganization energy of a self-exchange reaction was calculated by using a standard method<sup>47</sup> which was modified to incorporate the solvent effect<sup>48</sup>. The non-equilibrium solvent cage implemented in Gaussian program was used for solvent effect.

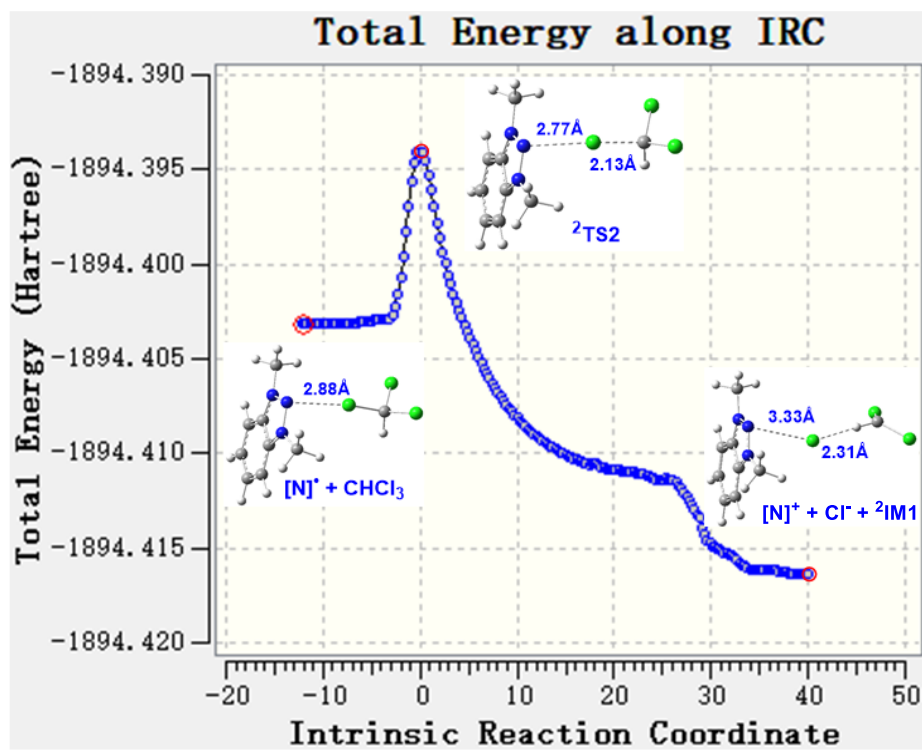

**Figure S30.** IRC results for confirming the right connections of  ${}^2TS2$  with  ${}^2IM1$  and  $[N]^{\bullet} + CHCl_3$ . Values are key bond lengths in angstroms.

**Cartesian Coordinates in Å, SCF Energies and Free Energies (in a.u.) at 298.15 K and 1 atm for the Optimized Structures [BSI= 6-31G(d,p), BSII=6-311++G(d,p)]**

**NHN A1**

B3LYP-D3BJ/BSI SCF energy in acetonitrile:

-486.622817 a.u.

M06/BSII SCF energy in acetonitrile:

-486.302401 a.u.

M06/BSII free energy in acetonitrile:

-486.169592 a.u.

C -1.631950 0.181480 -0.671001  
C -1.590550 0.069908 0.728954  
N -0.670713 2.014874 0.151982  
N -0.995030 1.230661 1.157118  
N -1.054841 1.396931 -0.944005  
C -0.799611 1.994040 -2.250360  
H -1.728553 2.000662 -2.821704  
H -0.444343 3.010123 -2.090068  
H -0.041512 1.402073 -2.766677  
C -0.638246 1.606591 2.520564  
H -0.383248 2.664734 2.519905  
H -1.494762 1.421087 3.169118  
H 0.217491 1.007425 2.838673  
C -2.162063 -0.829255 -1.484506  
C -2.642808 -1.944105 -0.819856  
C -2.603485 -2.056207 0.595673  
C -2.079910 -1.059029 1.400265  
H -2.183933 -0.738335 -2.563629  
H -3.062360 -2.762578 -1.394922  
H -2.995230 -2.956266 1.057209  
H -2.041552 -1.141697 2.479559  
I 2.228185 -0.456321 -0.058519

**NHN A2**

B3LYP-D3BJ/BSI SCF energy in acetonitrile:

-899.616901 a.u.

M06/BSII SCF energy in acetonitrile:

-899.348573 a.u.

M06/BSII free energy in acetonitrile:

-899.203239a.u.

C -1.353399 0.696978 0.313358  
C -1.371857 -0.706631 0.266751  
H -2.203684 2.561124 -0.416629  
C -2.228839 1.478719 -0.451404  
C -2.271468 -1.412554 -0.542424  
C -3.138430 -0.638965 -1.295746  
C -3.116693 0.779878 -1.251887  
H -2.279833 -2.495330 -0.575139  
H -3.857829 -1.129130 -1.943068  
H -3.819497 1.330390 -1.868171  
N 0.230656 -0.071647 1.674500  
N -0.376729 -1.099685 1.126592  
N -0.350779 1.005915 1.198110  
C 0.152831 2.326032 1.558209  
H 0.719966 2.724126 0.716642  
H -0.693824 2.969942 1.796938  
H 0.800041 2.210816 2.425318  
C 0.089129 -2.453510 1.402720  
H -0.768822 -3.074723 1.661575  
H 0.593135 -2.836508 0.515388  
H 0.786904 -2.400419 2.235969

B 2.286826 0.021225 -0.795956  
F 2.395888 -1.193308 -0.090500  
F 2.493446 1.098529 0.088062  
F 0.997425 0.120378 -1.353722  
F 3.246532 0.060159 -1.817276

### NHN A3

B3LYP-D3BJ/BSI SCF energy in acetonitrile:

-1436.605168 a.u.

M06/BSII SCF energy in acetonitrile:

-1436.291511 a.u.

M06/BSII free energy in acetonitrile:

-1436.136878 a.u.

C -1.877695 0.243521 0.694301  
C -1.874194 0.171677 -0.708334  
N -1.788917 -1.899370 0.101377  
N -1.827819 -1.170250 -0.991036  
N -1.828216 -1.062219 1.113215  
C -1.717585 -1.557830 2.478703  
H -2.524392 -1.132009 3.076546  
H -1.800037 -2.642797 2.447911  
H -0.743695 -1.262188 2.869587  
C -1.738121 -1.805550 -2.299589  
H -1.917365 -2.871120 -2.167001  
H -2.496525 -1.371618 -2.952105  
H -0.736253 -1.631513 -2.693239  
C -1.922538 1.466614 1.376919  
C -1.964016 2.598435 0.581351  
C -1.955373 2.526139 -0.836820  
C -1.908270 1.318894 -1.512416  
H -1.920815 1.515576 2.459069  
H -1.998285 3.574991 1.052441

H -1.982387 3.449702 -1.405283  
H -1.895506 1.256475 -2.593800  
O 1.116492 -1.056066 -1.312156  
S 1.858945 -0.892037 -0.039715  
O 3.228138 -1.450895 -0.032940  
O 1.066474 -1.148662 1.186087  
C 2.145947 0.936248 0.032780  
F 2.873439 1.353136 -1.019433  
F 2.807705 1.276286 1.153895  
F 0.982082 1.611253 0.021885

### [NHN]<sup>+</sup> ([N]<sup>+</sup>)

B3LYP-D3BJ/BSI SCF energy in acetonitrile:

-475.00748 a.u.

M06/BSII SCF energy in acetonitrile:

-474.719807 a.u.

M06/BSII free energy in acetonitrile:

-474.578622 a.u.

C -0.214197 -0.702655 -0.000015  
C -0.214180 0.702665 -0.000034  
H -1.393516 -2.531551 0.000062  
C -1.401288 -1.448318 0.000035  
C -1.401263 1.448345 -0.000027  
C -2.572479 0.710285 -0.000015  
C -2.572493 -0.710238 0.000016  
H -1.393473 2.531578 -0.000040  
H -3.524458 1.230194 -0.000020  
H -3.524482 -1.230128 0.000035  
N 1.900736 -0.000019 0.000047  
N 1.113974 1.054697 0.000018  
N 1.113955 -1.054714 0.000071  
C 1.686838 -2.397680 -0.000066



H 1.351891 -2.924882 0.894630  
H 1.351465 -2.924859 -0.894612  
H 2.770618 -2.298012 -0.000315  
C 1.686909 2.397643 -0.000006  
H 1.352018 2.924743 -0.894784  
H 1.351512 2.924964 0.894450  
H 2.770682 2.297920 0.000323

**F**

B3LYP-D3BJ/BSI SCF energy in acetonitrile:

-11.607332 a.u.

M06/BSII SCF energy in acetonitrile:

-11.572844 a.u.

M06/BSII free energy in acetonitrile:

-11.589692 a.u.

I 0.000000 0.000000 0.000000

**TMEDA**

B3LYP-D3BJ/BSI SCF energy in acetonitrile:

-347.8017 a.u.

M06/BSII SCF energy in acetonitrile:

-347.580305 a.u.

M06/BSII free energy in acetonitrile:

-347.392869 a.u.

N 1.864280 -0.035258 0.324696  
C 0.597704 -0.365820 -0.332078  
H 0.437072 -1.440231 -0.200574  
H 0.639125 -0.179932 -1.422748  
C -0.591083 0.400947 0.253994  
H -0.480633 1.466528 0.033191

H -0.580345 0.298596 1.355930  
N -1.865707 -0.034058 -0.323408  
C 2.907933 -0.972212 -0.076854  
H 3.835974 -0.744693 0.457905  
H 2.609902 -1.995018 0.175655  
H 3.126638 -0.939699 -1.161429  
C 2.289069 1.334761 0.052578  
H 2.421210 1.535683 -1.027997  
H 1.564556 2.053823 0.443323  
H 3.245871 1.525017 0.549100  
C -2.905474 0.966446 -0.106605  
H -3.838064 0.638534 -0.577582  
H -3.115680 1.149833 0.964443  
H -2.609898 1.918024 -0.559811  
C -2.296711 -1.325882 0.201611  
H -2.473237 -1.305058 1.294054  
H -3.229806 -1.627068 -0.285334  
H -1.551326 -2.098563 -0.003016

**CHCl<sub>3</sub>**

B3LYP-D3BJ/BSI SCF energy in acetonitrile:

-1419.28761 a.u.

M06/BSII SCF energy in acetonitrile:

-1419.25325 a.u.

M06/BSII free energy in acetonitrile:

-1419.262596 a.u.

C 0.000242 -0.000095 0.466826  
H 0.001751 -0.001349 1.552982  
Cl -0.319717 -1.671445 -0.085413  
Cl 1.607799 0.559044 -0.085432  
Cl -1.288270 1.112514 -0.085269

**1**

B3LYP-D3BJ/BSI SCF energy in acetonitrile:  
-670.370277 a.u.

M06/BSII SCF energy in acetonitrile:  
-670.02241 a.u.

M06/BSII free energy in acetonitrile:  
-669.83925 a.u.

|   |           |           |           |
|---|-----------|-----------|-----------|
| C | -1.985110 | 1.055795  | -0.483214 |
| C | -1.642666 | -0.254576 | -0.125085 |
| C | -2.637594 | -1.133737 | 0.322503  |
| C | -3.955433 | -0.695750 | 0.445416  |
| C | -4.293907 | 0.612993  | 0.090945  |
| C | -3.309368 | 1.483592  | -0.382145 |
| H | -1.224735 | 1.733827  | -0.857271 |
| H | -2.371430 | -2.154676 | 0.577303  |
| H | -4.718738 | -1.376792 | 0.809717  |
| H | -5.322289 | 0.950922  | 0.177644  |
| H | -3.571366 | 2.496280  | -0.673517 |
| C | -0.256344 | -0.801179 | -0.327587 |
| O | -0.091280 | -1.800126 | -1.015380 |
| N | 0.792514  | -0.096642 | 0.259607  |
| C | 0.556980  | 0.973292  | 1.249966  |
| H | -0.308537 | 0.712545  | 1.859475  |
| H | 1.425535  | 1.038991  | 1.904812  |
| H | 0.392662  | 1.948800  | 0.789609  |
| C | 2.141007  | -0.531721 | 0.077027  |
| O | 2.453395  | -1.707524 | 0.059701  |
| C | 3.163680  | 0.544630  | -0.112415 |
| C | 4.559609  | 0.202088  | 0.329448  |
| H | 4.589504  | -0.003177 | 1.405864  |
| H | 4.911961  | -0.702808 | -0.175641 |
| H | 5.249241  | 1.020451  | 0.110415  |

|   |          |          |           |
|---|----------|----------|-----------|
| C | 2.839760 | 1.674221 | -0.755371 |
| H | 3.592170 | 2.424134 | -0.983442 |
| H | 1.827812 | 1.871319 | -1.093713 |

**<sup>1</sup>CT1**

B3LYP-D3BJ/BSI SCF energy in acetonitrile:  
-834.440623591 a.u.

M06/BSII SCF energy in acetonitrile:  
-833.8949838 a.u.

M06/BSII free energy in acetonitrile:  
-833.5502968 a.u.

|   |             |             |             |
|---|-------------|-------------|-------------|
| I | 4.08792900  | -0.35656700 | -0.25242100 |
| C | -0.00388300 | -0.55570500 | -0.31360400 |
| C | 0.14937200  | -0.18755500 | 1.03291500  |
| C | -0.17165400 | -1.05689100 | 2.08355400  |
| C | -0.63997500 | -2.30565100 | 1.70872000  |
| C | -0.79087500 | -2.67862400 | 0.34693700  |
| C | -0.48434500 | -1.81581300 | -0.69213100 |
| H | -0.05251100 | -0.76652500 | 3.12026200  |
| H | -0.90126600 | -3.02501500 | 2.47733400  |
| H | -1.16319200 | -3.67087800 | 0.11707500  |
| H | -0.60201100 | -2.09266600 | -1.73250100 |
| N | 0.42027900  | 0.53776800  | -1.02625300 |
| N | 0.64889800  | 1.08974500  | 0.99267600  |
| N | 0.81542200  | 1.51230500  | -0.23877200 |
| C | 0.51561200  | 0.67678700  | -2.47396600 |
| H | 1.23081800  | -0.05556800 | -2.85312300 |
| H | -0.46869600 | 0.50470400  | -2.91172200 |
| H | 0.85710100  | 1.68671100  | -2.69155600 |
| C | 0.99950800  | 1.94889500  | 2.11603300  |
| H | 0.14404500  | 2.01113500  | 2.78944200  |
| H | 1.85968300  | 1.52289200  | 2.63581900  |

|   |             |             |             |   |             |                         |
|---|-------------|-------------|-------------|---|-------------|-------------------------|
| H | 1.24474200  | 2.93254600  | 1.72029300  |   |             |                         |
| C | -3.63599000 | -0.11849500 | 0.25096800  | C | -0.73968900 | 0.32375800 -0.85314500  |
| C | -3.20839200 | 1.08470100  | -0.59395700 | C | -0.60122900 | 0.49046700 0.53338100   |
| H | -2.77248000 | -0.46870500 | 0.82388900  | H | -0.53922900 | 1.20944200 -2.82922000  |
| H | -4.40921900 | 0.18720800  | 0.98102100  | C | -0.42792800 | 1.34386000 -1.76004600  |
| H | -2.73231700 | 0.71073700  | -1.50814000 | C | -0.14648900 | 1.68876000 1.09675300   |
| H | -4.09925900 | 1.66332300  | -0.90340800 | C | 0.15901200  | 2.69946300 0.20027700   |
| N | -2.23917400 | 1.94784800  | 0.08594500  | C | 0.02224200  | 2.52954700 -1.20249700  |
| N | -4.10767600 | -1.23829500 | -0.56920700 | H | -0.04312700 | 1.81118400 2.16811900   |
| C | -1.88162900 | 3.06644800  | -0.77820500 | H | 0.51515200  | 3.65210000 0.57757800   |
| H | -2.73687600 | 3.73682900  | -0.98724700 | H | 0.27768300  | 3.35776900 -1.85485400  |
| H | -1.09165300 | 3.66092100  | -0.30969700 | N | -1.35261900 | -1.56627600 0.14543900  |
| H | -1.50752500 | 2.69604100  | -1.73699800 | N | -0.99035500 | -0.70830700 1.07106500  |
| C | -2.72893300 | 2.44304400  | 1.36856700  | N | -1.20235900 | -0.95674600 -1.00844000 |
| H | -1.98251400 | 3.11472900  | 1.80387900  | C | -1.60923500 | -1.61676100 -2.24140800 |
| H | -3.67893200 | 3.00404800  | 1.27952700  | H | -2.55704200 | -1.18627400 -2.56562700 |
| H | -2.88601800 | 1.61823200  | 2.06812000  | H | -0.83563600 | -1.46535300 -2.99373700 |
| C | -4.42014700 | -2.38123200 | 0.28137200  | H | -1.72848500 | -2.67772100 -2.02948200 |
| H | -5.25270900 | -2.18030500 | 0.98238200  | C | -1.09134400 | -1.06458200 2.47937000  |
| H | -4.70195700 | -3.23929400 | -0.33785500 | H | -0.15055900 | -0.82209300 2.97411800  |
| H | -3.54253600 | -2.65728200 | 0.87272200  | H | -1.91645900 | -0.50336900 2.91826400  |
| C | -5.27092500 | -0.88058000 | -1.37581000 | H | -1.28645800 | -2.13355300 2.54045100  |
| H | -5.59883500 | -1.75420500 | -1.94799200 | N | 1.77187300  | -1.50264400 -0.13804200 |
| H | -6.12661300 | -0.53354100 | -0.76530200 | C | 2.57505000  | -0.31117300 0.12697000  |
| H | -5.02018200 | -0.08958600 | -2.08699200 | H | 2.35602000  | 0.02725100 1.14622400   |
|   |             |             |             | H | 2.22325400  | 0.46983400 -0.55419700  |
|   |             |             |             | C | 4.09902300  | -0.46932400 -0.00224400 |
|   |             |             |             | H | 4.37252400  | -0.65477100 -1.05881600 |
|   |             |             |             | H | 4.41874600  | -1.34879600 0.56735600  |
|   |             |             |             | N | 4.82113300  | 0.68718700 0.53614400   |
|   |             |             |             | C | 1.87833000  | -1.98749100 -1.50511400 |
|   |             |             |             | H | 1.12027700  | -2.75891300 -1.67896800 |
|   |             |             |             | H | 1.69542200  | -1.16330500 -2.20249900 |

**<sup>1</sup>CT2**  
B3LYP-D3BJ/BSI SCF energy in acetonitrile:  
-1247.43216694 a.u.

M06/BSII SCF energy in acetonitrile:  
-1246.939823 a.u.

M06/BSII free energy in acetonitrile:  
-1246.585445 a.u.

H 2.86039700 -2.42858900 -1.75140900  
 C 1.93766500 -2.56729000 0.83831800  
 H 2.90678700 -3.09412000 0.77529200  
 H 1.84211400 -2.15880700 1.84943500  
 H 1.14807100 -3.31453400 0.69860400  
 C 4.55403600 1.90617100 -0.22201400  
 H 5.14218200 2.73014800 0.19433800  
 H 4.81393000 1.81092200 -1.29409000  
 H 3.49913100 2.18427300 -0.15459900  
 C 6.25445500 0.42011500 0.57469100  
 H 6.69175600 0.25440000 -0.42863600  
 H 6.77860300 1.26580000 1.03223100  
 H 6.45093300 -0.47205200 1.17829300  
 B -4.21133700 0.37924500 0.24753900  
 F -4.06951800 -0.56241700 -0.79265600  
 F -3.39359400 1.49217000 -0.01542600  
 F -3.82100900 -0.21142700 1.46690300  
 F -5.55103400 0.78470600 0.33175900

**<sup>1</sup>CT3**

B3LYP-D3BJ/BSI SCF energy in acetonitrile:

-1784.41916626 a.u.

M06/BSII SCF energy in acetonitrile:

-1783.881249 a.u.

M06/BSII free energy in acetonitrile:

-1783.518797 a.u.

C 0.20306600 -0.06730100 -1.01751100  
 C 0.17721900 0.20613100 0.35864800  
 H 0.49151400 0.70987500 -3.02887100  
 C 0.47663200 0.92539800 -1.96740200  
 C 0.42347300 1.48694300 0.86787500  
 C 0.69578300 2.46808400 -0.07074800

C 0.72254400 2.19211600 -1.46294900  
 H 0.39529200 1.69126100 1.93097900  
 H 0.89278300 3.48110800 0.26360800  
 H 0.93943200 3.00254200 -2.15064300  
 N -0.25976400 -1.95402400 0.06537900  
 N -0.10814800 -0.99746000 0.95023500  
 N -0.07047700 -1.40779900 -1.11338900  
 C -0.28755600 -2.19084400 -2.32131500  
 H -1.25300000 -1.91222700 -2.74816400  
 H 0.51564800 -1.98071100 -3.02739000  
 H -0.28348200 -3.24400900 -2.04681300  
 C -0.30046200 -1.26832200 2.36813400  
 H 0.56712500 -0.90210700 2.91830900  
 H -1.20839300 -0.75341000 2.68637600  
 H -0.40110200 -2.34477300 2.49290700  
 N 2.85101100 -1.47207400 0.07272900  
 C 3.47899400 -0.16044100 0.21345100  
 H 3.13781600 0.27854100 1.15784700  
 H 3.08991600 0.46956400 -0.59260100  
 C 5.01593000 -0.13490900 0.20212000  
 H 5.39063100 -0.42503100 -0.79845000  
 H 5.39266000 -0.88063900 0.91077200  
 N 5.55244100 1.16732200 0.60886800  
 C 3.13320900 -2.12795200 -1.19432400  
 H 2.47610900 -2.99712600 -1.30920600  
 H 2.93369800 -1.43641500 -2.01958000  
 H 4.17334200 -2.48545000 -1.29615200  
 C 3.05062900 -2.35756600 1.20839200  
 H 4.07948800 -2.74912600 1.30570800  
 H 2.80286000 -1.82939200 2.13474800  
 H 2.37971600 -3.21936100 1.11785400  
 C 5.19642000 2.22650000 -0.33136600  
 H 5.65218900 3.16789600 -0.00891000

|   |             |             |             |   |             |             |             |
|---|-------------|-------------|-------------|---|-------------|-------------|-------------|
| H | 5.54043800  | 2.01754000  | -1.36275700 | N | -0.69097800 | -0.30705700 | -1.55326100 |
| H | 4.11387700  | 2.37499600  | -0.36024200 | N | -0.81375400 | 0.93920800  | -1.15715800 |
| C | 7.00122900  | 1.09430200  | 0.76123700  | N | -0.36751400 | -1.00989600 | -0.49062600 |
| H | 7.52403000  | 0.84499200  | -0.18211200 | C | -0.13871700 | -2.44574100 | -0.61628400 |
| H | 7.38750500  | 2.05640700  | 1.11390700  | H | 0.92331900  | -2.62850200 | -0.78421200 |
| H | 7.26012700  | 0.32908200  | 1.50033600  | H | -0.46457000 | -2.92514400 | 0.30601900  |
| O | -2.82470200 | 0.50439900  | 1.50417300  | H | -0.72873600 | -2.80729700 | -1.45668600 |
| O | -3.09145900 | 1.68347100  | -0.68712400 | C | -1.11722200 | 1.97985700  | -2.13085600 |
| O | -2.87304800 | -0.80815800 | -0.62298000 | H | -1.81958800 | 2.68063200  | -1.67995600 |
| S | -3.25898400 | 0.43447600  | 0.08717700  | H | -0.19030300 | 2.48460700  | -2.40604300 |
| C | -5.09879500 | 0.26747600  | 0.23236600  | H | -1.56546800 | 1.50442400  | -3.00152400 |
| F | -5.43061100 | -0.85328500 | 0.89881100  | C | 3.09840800  | 0.64458600  | 0.52550500  |
| F | -5.62955000 | 1.31270700  | 0.89285900  | C | 3.39102800  | 1.09813900  | 1.75656600  |
| F | -5.67519000 | 0.21137700  | -0.98225100 | H | 3.24506200  | 2.13692900  | 2.02433300  |

**1...NHN...I-**

B3LYP-D3BJ/BSI SCF energy in acetonitrile:

-1024.220081 a.u.

M06/BSII SCF energy in acetonitrile:

-1023.616018 a.u.

M06/BSII free energy in acetonitrile:

-1023.317716 a.u.

|   |             |             |            |   |            |             |             |
|---|-------------|-------------|------------|---|------------|-------------|-------------|
| C | -0.27165800 | -0.22429200 | 0.63146400 | C | 3.23412600 | -0.78565000 | 0.14868300  |
| C | -0.55926700 | 1.07683700  | 0.18405800 | C | 3.56998900 | -1.17818700 | -1.15829800 |
| H | 0.23944200  | -1.50641000 | 2.31112900 | C | 3.05786500 | -1.78659700 | 1.12054000  |
| C | 0.02678200  | -0.50072700 | 1.97263200 | C | 3.73255200 | -2.52660800 | -1.47685100 |
| C | -0.53814000 | 2.18196300  | 1.04663100 | H | 3.70942200 | -0.42628800 | -1.92479600 |
| C | -0.22791200 | 1.90832500  | 2.36754400 | C | 3.22523300 | -3.13313000 | 0.80237200  |
| C | 0.04435900  | 0.59070500  | 2.82300000 | H | 2.77189500 | -1.50772900 | 2.12862100  |
| H | -0.75226700 | 3.18325800  | 0.69397100 | C | 3.56267500 | -3.51030800 | -0.49971800 |
| H | -0.19198400 | 2.72381500  | 3.08190300 | H | 3.99658800 | -2.80790400 | -2.49210400 |
| H | 0.27652800  | 0.43996900  | 3.87169800 | H | 3.07957600 | -3.88798500 | 1.56941800  |
|   |             |             |            | H | 3.68556800 | -4.55937300 | -0.75172700 |
|   |             |             |            | C | 2.55542200 | 1.59725700  | -0.49428200 |
|   |             |             |            | O | 2.01538200 | 1.26223100  | -1.53703200 |
|   |             |             |            | O | 2.71538800 | 2.88165000  | -0.13433700 |
|   |             |             |            | C | 2.16189200 | 3.86728200  | -1.02593700 |
|   |             |             |            | H | 1.06991600 | 3.83030000  | -1.00577000 |
|   |             |             |            | H | 2.50778200 | 4.82921400  | -0.64822400 |
|   |             |             |            | H | 2.51775900 | 3.70875300  | -2.04584100 |

I -4.22039900 -0.53834300 -0.00742800

**CHCl<sub>3</sub>...NHN<sup>+</sup>...I<sup>-</sup>**

B3LYP-D3BJ/BSI SCF energy in acetonitrile:

-1905.914816 a.u.

M06/BSII SCF energy in acetonitrile:

-1905.558472 a.u.

M06/BSII free energy in acetonitrile:

-1905.417869 a.u.

C 1.81581000 -1.71703400 0.54621100

C 1.80577400 -1.56729400 -0.85072500

H 2.81726300 -2.54905600 2.28903000

C 2.81316400 -2.44323000 1.21107600

C 2.79062300 -2.13857900 -1.66829400

C 3.77497600 -2.85541000 -1.01000200

C 3.78656400 -3.00411400 0.40266100

H 2.77814500 -2.01845600 -2.74466100

H 4.56688300 -3.31945300 -1.58802400

H 4.58753900 -3.57570100 0.85910700

N 0.06681900 -0.45803000 -0.01252000

N 0.70468500 -0.79090800 -1.11363700

N 0.71955100 -1.01573200 0.98365200

C 0.29460200 -0.79340600 2.36187500

H 0.13723100 -1.75949400 2.84351400

H 1.07365900 -0.23306600 2.88206000

H -0.63176800 -0.22320000 2.34145100

C 0.24834900 -0.29244200 -2.40645200

H 1.03871500 0.32079800 -2.84246500

H 0.02375300 -1.14041500 -3.05516600

H -0.64355900 0.30750400 -2.23886600

C -4.80272500 -0.33423000 -0.31293200

H -5.05116400 -1.14683600 -0.98915300

Cl -3.02750400 -0.29435400 -0.11809700

Cl -5.61309800 -0.65586600 1.25177300

Cl -5.40424200 1.18753100 -1.04028800

I 2.68802700 2.22698500 0.22665300

**<sup>1</sup>CT1eq\***

B3LYP-D3BJ/BSI SCF energy in acetonitrile:

-834.3746157 a.u.

M06/BSII SCF energy in acetonitrile:

-833.8158036 a.u.

M06/BSII free energy in acetonitrile:

-833.4776066 a.u.

I 4.17279600 -0.25626500 -0.14826400

C -0.04818200 -0.44614200 -0.60937400

C 0.08243000 -0.50908000 0.79308000

C -0.17297500 -1.68476500 1.49471400

C -0.57534600 -2.80349600 0.74247800

C -0.71312100 -2.73819000 -0.64640600

C -0.44737400 -1.55203300 -1.35393200

H -0.05272900 -1.73754600 2.57045000

H -0.77830600 -3.73745600 1.25655200

H -1.02543900 -3.62037500 -1.19566600

H -0.53841100 -1.50279200 -2.43281500

N 0.25333800 0.85486200 -0.96188400

N 0.45540700 0.75438400 1.19503500

N 0.66443200 1.60721700 0.12771400

C 0.62315300 1.31806200 -2.28174400

H 1.63825100 0.99903400 -2.54412800

H -0.08360900 0.91906200 -3.01180000

H 0.57193300 2.40745200 -2.29742300

C 0.94359800 1.14810300 2.49694000

H 0.34737700 0.65363100 3.26607900  
H 1.99775700 0.88056400 2.62869500  
H 0.82887200 2.22812900 2.59961500  
C -3.62910000 -0.06128200 0.39980400  
C -3.20383600 1.05990600 -0.54325800  
H -2.74489000 -0.45066300 0.90973000  
H -4.31869500 0.32718800 1.17019900  
H -2.53778300 0.67238700 -1.31905000  
H -4.05901600 1.51042000 -1.05817400  
N -2.50836300 2.16854500 0.08551200  
N -4.22615900 -1.15595900 -0.36247200  
C -2.05761400 3.26105700 -0.74948400  
H -2.65692100 4.14280800 -0.50678300  
H -1.01380300 3.46122400 -0.50377400  
H -2.16880600 3.00229300 -1.79981500  
C -2.43646300 2.32107600 1.52140200  
H -1.82439100 3.18575600 1.76466800  
H -3.45128500 2.45453400 1.90491800  
H -2.01377200 1.41648200 1.95793500  
C -4.32876700 -2.35057400 0.47290700  
H -4.99165000 -2.20585900 1.34594600  
H -4.72959100 -3.17751300 -0.12106600  
H -3.33841900 -2.63565900 0.83622800  
C -5.53849800 -0.80496300 -0.90117200  
H -5.94946600 -1.66543800 -1.43695200  
H -6.25854000 -0.51524200 -0.11362700  
H -5.46488600 0.02021700 -1.61500700

**<sup>1</sup>TS1\***

B3LYP-D3BJ/BSI SCF energy in acetonitrile:

-2253.658446 a.u.

M06/BSII SCF energy in acetonitrile:

-2253.056791 a.u.

M06/BSII free energy in acetonitrile:

-2252.707708 a.u.

C -4.20460300 -1.21790700 -0.21397200  
H -4.07899600 -0.14364600 -0.11247500  
Cl -2.17941200 -1.90195600 -0.05012400  
Cl -4.90844400 -1.56826700 -1.82119500  
Cl -5.22296000 -1.81614400 1.12995500  
I -2.70846900 2.58732600 -0.02545500  
C 1.09958800 0.19397500 -0.36202500  
C 0.96086600 0.13537900 1.03686500  
C 1.12787500 1.26534700 1.84043700  
C 1.43923400 2.45316200 1.17898300  
C 1.58281700 2.50962600 -0.22174900  
C 1.41815600 1.38139500 -1.02380600  
H 1.01448900 1.21844500 2.91688800  
H 1.57330000 3.36019400 1.75878000  
H 1.82803300 3.45734000 -0.68867300  
H 1.52534600 1.41910900 -2.10099200  
N 0.89707500 -1.09433100 -0.80106800  
N 0.69471500 -1.18609200 1.31863300  
N 0.58425600 -1.92947300 0.20511800  
C 0.78494900 -1.55141400 -2.17363300  
H -0.12698700 -1.15254700 -2.62574500  
H 1.65635600 -1.21140800 -2.73626600  
H 0.74909200 -2.63931900 -2.16809000  
C 0.31844100 -1.76604600 2.59359900  
H 0.90742300 -1.29356300 3.38026900  
H -0.74754800 -1.60459500 2.77665400  
H 0.53182000 -2.83399800 2.56382700  
C 4.71591500 0.09532500 0.21147300  
C 4.37444300 -1.12148400 -0.64259700  
H 3.82953000 0.40224500 0.77243400

|   |            |             |             |   |             |             |             |
|---|------------|-------------|-------------|---|-------------|-------------|-------------|
| H | 5.50350800 | -0.16448400 | 0.94098300  | C | -1.13626700 | 1.09644300  | -0.41531900 |
| H | 3.65583800 | -0.85389700 | -1.42335900 | H | -1.07961200 | -0.67752600 | 0.78675100  |
| H | 5.25498900 | -1.51937700 | -1.15798500 | H | -2.25167600 | 0.52382800  | 1.36232900  |
| N | 3.81247600 | -2.25033800 | 0.07727000  | H | -0.97463400 | 0.68726400  | -1.41497500 |
| N | 5.10691100 | 1.21278300  | -0.64494000 | H | -1.76180200 | 1.99617700  | -0.51731800 |
| C | 3.46726700 | -3.43693100 | -0.67694300 | N | 0.16408600  | 1.53821700  | 0.09590100  |
| H | 4.16590200 | -4.22992200 | -0.39675400 | N | -2.85040200 | -0.67299200 | -0.29764600 |
| H | 2.45900800 | -3.74277800 | -0.39338500 | C | 0.85523800  | 2.46486400  | -0.79585000 |
| H | 3.52801600 | -3.23423100 | -1.74333800 | H | 0.32108200  | 3.42578700  | -0.80563200 |
| C | 3.80749000 | -2.32426000 | 1.52155400  | H | 1.87317400  | 2.62345300  | -0.44039300 |
| H | 3.29125400 | -3.22738600 | 1.83731600  | H | 0.87422000  | 2.05668800  | -1.80664000 |
| H | 4.84434700 | -2.33954500 | 1.86768800  | C | 0.22182700  | 1.90822900  | 1.50613500  |
| H | 3.32055300 | -1.43860100 | 1.92892200  | H | 1.24580900  | 2.17882000  | 1.76364700  |
| C | 5.19111900 | 2.44028900  | 0.14325000  | H | -0.43645500 | 2.77118600  | 1.68346500  |
| H | 5.98145300 | 2.39945300  | 0.91510200  | H | -0.10225200 | 1.07833900  | 2.13215500  |
| H | 5.40808100 | 3.28474800  | -0.51784200 | C | -3.30950600 | -1.83467000 | 0.45798000  |
| H | 4.23679800 | 2.62883600  | 0.64094900  | H | -3.79159500 | -1.56412500 | 1.41607000  |
| C | 6.37117600 | 0.97276800  | -1.33872000 | H | -4.03643700 | -2.39638000 | -0.13694100 |
| H | 6.62943600 | 1.85704100  | -1.92836100 | H | -2.46323400 | -2.49264200 | 0.67877700  |
| H | 7.20661200 | 0.76811600  | -0.64424100 | C | -3.97921000 | 0.18244600  | -0.65390300 |
| H | 6.28860800 | 0.13058100  | -2.03135400 | H | -4.72058700 | -0.40455100 | -1.20451400 |
|   |            |             |             | H | -4.47860700 | 0.62171400  | 0.23020300  |
|   |            |             |             | H | -3.65564900 | 1.00172500  | -1.30212900 |

**[TMEDA...I]**

B3LYP-D3BJ/BSI SCF energy in acetonitrile:

-359.2418913 a.u.

M06/BSII SCF energy in acetonitrile:

-358.9746751 a.u.

M06/BSII free energy in acetonitrile:

-358.7921271 a.u.

I 1.87356800 -0.76762400 -0.08225900

C -1.82819300 0.04898200 0.45880500

**<sup>3</sup>CT1**

B3LYP-D3BJ/BSI SCF energy in acetonitrile:

-834.3606709 a.u.

M06/BSII SCF energy in acetonitrile:

-833.8108703 a.u.

M06/BSII free energy in acetonitrile:

-833.4761613 a.u.

I 4.08763600 -0.29619200 -0.37571000



C -0.07618500 -0.30119300 -0.37126000  
C 0.15716300 -0.50327300 1.00598100  
C -0.04398200 -1.74552100 1.60080300  
C -0.49303100 -2.78842000 0.76727400  
C -0.71961300 -2.58821300 -0.59629600  
C -0.50936200 -1.33214600 -1.19732700  
H 0.15224600 -1.90641000 2.65478100  
H -0.65723100 -3.77125600 1.19790900  
H -1.06105500 -3.41577700 -1.20979200  
H -0.66745200 -1.17721000 -2.25844100  
N 0.18384500 1.03515300 -0.61349600  
N 0.56353800 0.71656500 1.50570400  
N 0.70165600 1.67286200 0.51493900  
C 0.52599800 1.59007400 -1.90692800  
H 1.50371000 1.22669300 -2.24599100  
H -0.23842800 1.30549600 -2.63299400  
H 0.55497500 2.67680100 -1.82506100  
C 1.20708500 0.95790900 2.77765200  
H 0.68148600 0.40205600 3.55668300  
H 2.25861400 0.64686900 2.75331000  
H 1.14826900 2.02462800 2.99975200  
C -3.61091100 -0.12064300 0.29463900  
C -3.19594300 1.03276200 -0.61421700  
H -2.72349300 -0.52087600 0.79151400  
H -4.30106500 0.24280900 1.07712600  
H -2.55790600 0.66273900 -1.42700000  
H -4.06412500 1.50213900 -1.09828600  
N -2.47897100 2.11330100 0.03733300  
N -4.20160300 -1.19796900 -0.49729600  
C -2.15096200 3.27732100 -0.75535300  
H -2.93196700 4.03399200 -0.59221800  
H -1.19560200 3.68284800 -0.41949600  
H -2.11912300 3.01370300 -1.81167100

C -2.31696000 2.18068500 1.46906100  
H -1.69833300 3.03763600 1.72511700  
H -3.30790000 2.27665800 1.93296300  
H -1.85573200 1.26028600 1.83578200  
C -4.32847400 -2.40535200 0.31553800  
H -5.00822000 -2.27126900 1.17724200  
H -4.72177200 -3.21968100 -0.30059300  
H -3.34730400 -2.70286600 0.69452000  
C -5.49911700 -0.83140100 -1.06082600  
H -5.90155200 -1.68184500 -1.61873800  
H -6.23640800 -0.54882100 -0.28672200  
H -5.40285300 0.00390200 -1.75977700

### **<sup>3</sup>TS1**

B3LYP-D3BJ/BSI SCF energy in acetonitrile:

-2253.645707 a.u.

M06/BSII SCF energy in acetonitrile:

-2253.05562 a.u.

M06/BSII free energy in acetonitrile:

-2252.711587 a.u.

C -4.33495200 -1.08201200 -0.17329500  
H -4.14253600 -0.01263600 -0.13057000  
Cl -2.30558900 -1.85874500 -0.08091100  
Cl -5.12617000 -1.48496600 -1.71979500  
Cl -5.29134500 -1.57661600 1.24817100  
I -2.58874900 2.61452200 -0.06590400  
C 1.09318000 0.10125500 -0.38122800  
C 0.95833700 0.00754500 1.01748600  
C 1.18383900 1.10376300 1.85336500  
C 1.55169200 2.29478300 1.22611700  
C 1.69291300 2.38577200 -0.17271800  
C 1.46793900 1.29128800 -1.00782800

H 1.07060000 1.02999800 2.92844200  
 H 1.73304000 3.17604600 1.83235500  
 H 1.98327100 3.33385000 -0.61237800  
 H 1.56986000 1.35786400 -2.08420600  
 N 0.82209700 -1.16160700 -0.85624800  
 N 0.62155000 -1.30398200 1.26151200  
 N 0.46085100 -2.00737100 0.12704400  
 C 0.65121000 -1.56530500 -2.23875200  
 H -0.31506200 -1.21496600 -2.61264600  
 H 1.45726800 -1.13456000 -2.83448800  
 H 0.69408400 -2.65231400 -2.28825700  
 C 0.24078000 -1.90412700 2.52496800  
 H 0.88326200 -1.50566400 3.31113600  
 H -0.80594800 -1.67689300 2.74653100  
 H 0.37676600 -2.98239000 2.44932800  
 C 4.77809100 0.07236200 0.24305500  
 C 4.42652700 -1.10772300 -0.65807600  
 H 3.87753400 0.39461000 0.77259200  
 H 5.52410900 -0.23446400 0.99710900  
 H 3.75788600 -0.78960800 -1.46768000  
 H 5.31900100 -1.52432100 -1.15081800  
 N 3.79616300 -2.22998000 0.00655200  
 N 5.24254100 1.19544300 -0.56647500  
 C 3.35090500 -3.34285200 -0.80125700  
 H 4.06766000 -4.16639500 -0.67214300  
 H 2.37591900 -3.67775500 -0.43824200  
 H 3.30457300 -3.05287900 -1.84933300  
 C 3.78526000 -2.37362200 1.44387400  
 H 3.13833600 -3.20395000 1.72038100  
 H 4.81168400 -2.57508900 1.78166500  
 H 3.45170700 -1.44498000 1.91111200  
 C 5.31113700 2.40784700 0.24619600  
 H 6.05900700 2.33608900 1.05700300

H 5.58134000 3.25738100 -0.38821400  
 H 4.33615900 2.60883700 0.69653000  
 C 6.53429600 0.93652900 -1.19897100  
 H 6.84275300 1.82317000 -1.76021700  
 H 7.32751600 0.70077600 -0.46612800  
 H 6.46731300 0.10560800 -1.90715000

**[N]•**

B3LYP-D3BJ/BSI SCF energy in acetonitrile:

-475.107345 a.u.

M06/BSII SCF energy in acetonitrile:

-474.832051 a.u.

M06/BSII free energy in acetonitrile:

-474.69747 a.u.

C 0.205886 -0.707518 -0.048567  
 C 0.205887 0.707526 -0.048603  
 H 1.390816 -2.518761 0.010654  
 C 1.393789 -1.434486 -0.005604  
 C 1.393793 1.434488 -0.005666  
 C 2.594673 0.698294 0.025211  
 C 2.594670 -0.698295 0.025242  
 H 1.390825 2.518764 0.010543  
 H 3.538921 1.233555 0.057990  
 H 3.538917 -1.233558 0.058042  
 N -1.979914 0.000004 -0.055578  
 N -1.115694 1.082574 -0.105635  
 N -1.115692 -1.082565 -0.105550  
 C -1.658904 -2.404627 0.101303  
 H -1.025506 -3.136614 -0.404497  
 H -1.717491 -2.656656 1.167838  
 H -2.659832 -2.442081 -0.332522  
 C -1.658912 2.404613 0.101376

H -1.717819 2.656392 1.167956  
H -1.025319 3.136669 -0.404059  
H -2.659707 2.442225 -0.332748

**TMEDA<sup>2+</sup>**

B3LYP-D3BJ/BSI SCF energy in acetonitrile:

-347.639494 a.u.

M06/BSII SCF energy in acetonitrile:

-347.398088 a.u.

M06/BSII free energy in acetonitrile:

-347.211755 a.u.

N 1.828862 -0.008052 0.355124  
C 0.462808 -0.064994 0.678131  
H 0.166480 0.811858 1.256777  
H 0.226834 -0.988170 1.211096  
C -0.462751 -0.064755 -0.678227  
H -0.226629 -0.987674 -1.211583  
H -0.166649 0.812440 -1.256438  
N -1.828786 -0.008060 -0.355083  
C 2.384968 1.262508 -0.071430  
H 2.213296 1.429796 -1.145776  
H 1.921006 2.074898 0.490605  
H 3.463797 1.263053 0.104730  
C 2.470032 -1.200217 -0.167771  
H 3.546185 -1.143305 0.016673  
H 2.060073 -2.084373 0.323665  
H 2.312999 -1.290727 -1.253384  
C -2.385272 1.262306 0.071515  
H -1.921042 2.074939 -0.489903  
H -3.464018 1.262729 -0.105301  
H -2.214471 1.429202 1.146068  
C -2.469770 -1.200360 0.167732

H -2.314103 -1.290021 1.253605  
H -3.545753 -1.144270 -0.018102  
H -2.058625 -2.084509 -0.322716

**Cl<sup>-</sup>**

B3LYP-D3BJ/BSI SCF energy in acetonitrile:

-460.357359 a.u.

M06/BSII SCF energy in acetonitrile:

-460.367097 a.u.

M06/BSII free energy in acetonitrile:

-460.38212 a.u.

Cl 0.000000 0.000000 0.000000

**<sup>2</sup>TS2**

B3LYP-D3BJ/BSI SCF energy in acetonitrile:

-1894.393927 a.u.

M06/BSII SCF energy in acetonitrile:

-1894.076498 a.u.

M06/BSII free energy in acetonitrile:

-1893.931983 a.u.

C -2.410675 0.643974 0.302989  
C -2.500956 -0.670505 -0.197337  
H -3.000239 2.720187 0.079603  
C -3.078251 1.709868 -0.304535  
C -3.262756 -0.975085 -1.327574  
C -3.933045 0.090467 -1.931907  
C -3.843016 1.403151 -1.431726  
H -3.323926 -1.985678 -1.713980  
H -4.536125 -0.098836 -2.814066  
H -4.378368 2.199761 -1.938180  
N -1.112196 -0.687689 1.585659

N -1.734761 -1.434207 0.652534  
 N -1.597651 0.556717 1.408060  
 C -1.063095 1.642548 2.205502  
 H -0.218438 2.110001 1.690832  
 H -1.850740 2.379013 2.372338  
 H -0.732962 1.236198 3.161218  
 C -1.361450 -2.827318 0.511132  
 H -2.192467 -3.367698 0.056866  
 H -0.469015 -2.917310 -0.116106  
 H -1.157387 -3.234231 1.501875  
 C 3.103487 0.106166 -0.738042  
 H 2.736229 0.047131 -1.758574  
 Cl 1.378969 -0.364719 0.414497  
 Cl 3.656559 1.771384 -0.410187  
 Cl 4.395899 -1.105011 -0.508817

**<sup>2</sup>IM1**

B3LYP-D3BJ/BSI SCF energy in acetonitrile:  
-959.037198 a.u.

M06/BSII SCF energy in acetonitrile:  
-959.003217 a.u.

M06/BSII free energy in acetonitrile:  
-959.014626 a.u.

C 0.000533 0.695875 -0.100062  
 H -0.000067 1.711750 0.276799  
 Cl -1.482546 -0.173095 0.009510  
 Cl 1.482362 -0.173200 0.009524

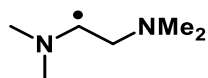

B3LYP-D3BJ/BSI SCF energy in acetonitrile:  
-347.147555 a.u.

M06/BSII SCF energy in acetonitrile:  
-346.927621 a.u.

M06/BSII free energy in acetonitrile:  
-346.753977 a.u.

N -1.616202 0.023618 -0.101189  
 C -0.645722 -0.973736 0.020187  
 H -0.719732 -1.743514 -0.744662  
 C 0.708775 -0.725818 0.596107  
 H 1.100572 -1.687437 0.950874  
 H 0.655970 -0.068935 1.483674  
 N 1.710323 -0.209768 -0.370917  
 C -2.899117 -0.411807 -0.637078  
 H -3.478880 0.458957 -0.956932  
 H -2.734666 -1.057345 -1.504109  
 H -3.494872 -0.971587 0.102493  
 C -1.739767 1.022509 0.951944  
 H -2.104449 0.589979 1.898258  
 H -0.779817 1.505166 1.142274  
 H -2.447071 1.791223 0.629855  
 C 3.046849 -0.257815 0.209874  
 H 3.784467 0.087665 -0.522427  
 H 3.150680 0.372508 1.114744  
 H 3.297452 -1.287143 0.488061  
 C 1.392778 1.145038 -0.805896  
 H 1.424686 1.881563 0.020834  
 H 2.112236 1.468415 -1.566077  
 H 0.391808 1.173298 -1.242944

**<sup>2</sup>TS3**

B3LYP-D3BJ/BSI SCF energy in acetonitrile:  
-1766.44518 a.u.

M06/BSII SCF energy in acetonitrile:

-1766.185438 a.u.

M06/BSII free energy in acetonitrile:

-1766.004473 a.u.

|    |           |           |           |
|----|-----------|-----------|-----------|
| N  | -1.625829 | 1.559006  | 0.453292  |
| C  | -1.493392 | 0.210324  | 0.637575  |
| H  | -1.372539 | -0.077910 | 1.677454  |
| C  | -2.138704 | -0.809114 | -0.253135 |
| H  | -1.565769 | -1.735747 | -0.151084 |
| H  | -2.079410 | -0.520387 | -1.316490 |
| N  | -3.525055 | -1.119949 | 0.148157  |
| C  | -1.036942 | 2.437548  | 1.455445  |
| H  | -1.567796 | 3.393391  | 1.459771  |
| H  | -1.123370 | 1.979093  | 2.442464  |
| H  | 0.025134  | 2.628542  | 1.246205  |
| C  | -1.688358 | 2.133906  | -0.883980 |
| H  | -0.691301 | 2.172240  | -1.345594 |
| H  | -2.348997 | 1.553601  | -1.526941 |
| H  | -2.079518 | 3.151558  | -0.813387 |
| C  | -3.977513 | -2.349527 | -0.494159 |
| H  | -4.990357 | -2.591243 | -0.155916 |
| H  | -3.997947 | -2.279984 | -1.598633 |
| H  | -3.317116 | -3.179099 | -0.221170 |
| C  | -4.442128 | -0.023029 | -0.140964 |
| H  | -4.518884 | 0.198433  | -1.222639 |
| H  | -5.443670 | -0.278465 | 0.220538  |
| H  | -4.116651 | 0.886520  | 0.369553  |
| C  | 2.862135  | -0.632325 | -0.433766 |
| H  | 2.824324  | -1.375434 | -1.225583 |
| Cl | 1.030883  | -0.259840 | 0.059523  |
| Cl | 3.659996  | 0.834906  | -1.082344 |
| Cl | 3.774383  | -1.328314 | 0.942187  |

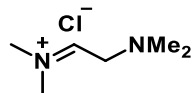

B3LYP-D3BJ/BSI SCF energy in acetonitrile:

-807.423254 a.u.

M06/BSII SCF energy in acetonitrile:

-807.200861 a.u.

M06/BSII free energy in acetonitrile:

-807.027063 a.u.

|    |           |           |           |
|----|-----------|-----------|-----------|
| N  | -1.475924 | -1.008435 | -0.222412 |
| C  | -0.326499 | -0.483931 | -0.488113 |
| H  | -0.231508 | 0.036448  | -1.433346 |
| C  | 0.903153  | -0.701097 | 0.335441  |
| H  | 0.981210  | -1.775905 | 0.538282  |
| H  | 0.779134  | -0.205267 | 1.314550  |
| N  | 2.094841  | -0.280363 | -0.392285 |
| C  | -2.638500 | -0.745783 | -1.074175 |
| H  | -3.333179 | -0.106723 | -0.523522 |
| H  | -2.320251 | -0.242628 | -1.985760 |
| H  | -3.122397 | -1.694756 | -1.314508 |
| C  | -1.765871 | -1.677677 | 1.048880  |
| H  | -2.582846 | -2.381650 | 0.894144  |
| H  | -0.889730 | -2.211321 | 1.413441  |
| H  | -2.066887 | -0.919938 | 1.778725  |
| C  | 3.283913  | -0.953009 | 0.122777  |
| H  | 4.153332  | -0.653305 | -0.470213 |
| H  | 3.494907  | -0.709862 | 1.180139  |
| H  | 3.167395  | -2.038151 | 0.038094  |
| C  | 2.267988  | 1.170759  | -0.366936 |
| H  | 2.475779  | 1.551416  | 0.649951  |
| H  | 3.105939  | 1.446528  | -1.014767 |
| H  | 1.361963  | 1.667246  | -0.720643 |
| Cl | -1.155905 | 2.211993  | 0.381828  |

**<sup>2</sup>TS3**

B3LYP-D3BJ/BSI SCF energy in acetonitrile:

-1496.623177 a.u.

M06/BSII SCF energy in acetonitrile:

-1496.311662 a.u.

M06/BSII free energy in acetonitrile:

-1496.164552 a.u.

|    |           |           |           |
|----|-----------|-----------|-----------|
| C  | 1.834830  | 3.422515  | 0.289613  |
| H  | 1.808045  | 3.539054  | -0.796722 |
| H  | 1.235693  | 4.210794  | 0.752425  |
| H  | 2.862873  | 3.469589  | 0.648575  |
| C  | 0.081532  | 1.844903  | 0.317699  |
| O  | -0.622746 | 2.638149  | -0.286152 |
| C  | -0.352707 | 0.490785  | 0.762685  |
| C  | 0.487830  | -0.286562 | 1.490138  |
| H  | 0.171792  | -1.258195 | 1.852781  |
| H  | 1.437197  | 0.092271  | 1.845461  |
| C  | 1.680907  | -1.568198 | -0.312524 |
| H  | 0.852296  | -2.242225 | -0.498228 |
| Cl | 3.043859  | -2.297647 | 0.479499  |
| Cl | 2.018056  | -0.471543 | -1.611957 |
| O  | 1.351490  | 2.123692  | 0.672685  |
| C  | -1.686379 | 0.004312  | 0.343608  |
| C  | -2.183408 | 0.237226  | -0.951315 |
| C  | -2.464512 | -0.757467 | 1.233177  |
| C  | -3.414637 | -0.286279 | -1.342817 |
| H  | -1.597668 | 0.820828  | -1.650807 |
| C  | -3.697091 | -1.276953 | 0.840593  |
| H  | -2.105082 | -0.925486 | 2.243862  |
| C  | -4.177224 | -1.044167 | -0.450324 |
| H  | -3.778188 | -0.103840 | -2.349992 |

H -4.285729 -1.856366 1.545907

H -5.138596 -1.445610 -0.756954

**<sup>2</sup>IM2**

B3LYP-D3BJ/BSI SCF energy in acetonitrile:

-1496.682761 a.u.

M06/BSII SCF energy in acetonitrile:

-1496.371417 a.u.

M06/BSII free energy in acetonitrile:

-1496.217977 a.u.

|    |           |           |           |
|----|-----------|-----------|-----------|
| C  | -1.877983 | 3.477231  | -0.520704 |
| H  | -2.016494 | 3.662198  | 0.547695  |
| H  | -1.185705 | 4.218151  | -0.928470 |
| H  | -2.834969 | 3.529023  | -1.039849 |
| C  | -0.181598 | 1.863987  | -0.201731 |
| O  | 0.453173  | 2.711332  | 0.415536  |
| C  | 0.224186  | 0.468278  | -0.454966 |
| C  | -0.843477 | -0.484136 | -0.933681 |
| H  | -0.450153 | -1.159620 | -1.697860 |
| H  | -1.673804 | 0.062779  | -1.375236 |
| C  | -1.380767 | -1.363105 | 0.196675  |
| H  | -0.608755 | -1.955913 | 0.679729  |
| Cl | -2.589394 | -2.545307 | -0.455930 |
| Cl | -2.136322 | -0.375745 | 1.515639  |
| O  | -1.389385 | 2.145401  | -0.746024 |
| C  | 1.563445  | 0.000577  | -0.219988 |
| C  | 2.612601  | 0.846472  | 0.246257  |
| C  | 1.902064  | -1.361994 | -0.473234 |
| C  | 3.894145  | 0.355382  | 0.448580  |
| H  | 2.393092  | 1.883844  | 0.449948  |
| C  | 3.186942  | -1.840810 | -0.263853 |
| H  | 1.155023  | -2.052216 | -0.844941 |

C 4.195692 -0.988713 0.199813  
H 4.669726 1.026839 0.805142  
H 3.406424 -2.884522 -0.467252  
H 5.200990 -1.365571 0.360953

**<sup>2</sup>TS4**

B3LYP-D3BJ/BSI SCF energy in acetonitrile:

-2915.941526 a.u.

M06/BSII SCF energy in acetonitrile:

-2915.593899 a.u.

M06/BSII free energy in acetonitrile:

-2915.433276 a.u.

C 0.17254700 -2.77425400 2.82136400  
H 0.60233300 -2.27667200 3.69332300  
H -0.90299100 -2.89985100 2.96349000  
H 0.65105200 -3.73911400 2.65792800  
C -0.06495400 -0.75942900 1.61037900  
O -0.69869700 -0.27976300 2.53213900  
C 0.16465300 -0.06862100 0.28884400  
C 0.98540300 -0.84624200 -0.74581200  
H 0.94018200 -0.34696300 -1.71523400  
H 0.54813100 -1.83997200 -0.86375500  
C 2.44723000 -1.05866300 -0.36085300  
H 2.56208200 -1.46694800 0.63829000  
Cl 3.41451300 0.46751800 -0.39776000  
Cl 3.19811900 -2.27207300 -1.48595500  
O 0.43465800 -2.00772900 1.62690100  
C 0.35993200 1.41322300 0.33623400  
C 0.69299600 2.10290000 1.51479800  
C 0.22222800 2.15037400 -0.85523100  
C 0.90030800 3.48085900 1.49375600  
H 0.80433400 1.56080600 2.44476700

C 0.41807200 3.52778700 -0.87102100  
H -0.04569900 1.64278700 -1.77647400  
C 0.76287100 4.20024900 0.30472600  
H 1.17217800 3.99368800 2.41161100  
H 0.30074500 4.07653200 -1.80055700  
H 0.92129000 5.27438900 0.29397800  
H -1.00830600 -0.19994200 -0.17805200  
C -2.39243200 -0.35945500 -0.63458300  
Cl -2.33922300 -0.46210500 -2.39650000  
Cl -2.96807900 -1.84710300 0.12361300  
Cl -3.21392500 1.08251800 -0.04676300

**<sup>1</sup>IM3**

B3LYP-D3BJ/BSI SCF energy in acetonitrile:

-1496.810429 a.u.

M06/BSII SCF energy in acetonitrile:

-1496.514688 a.u.

M06/BSII free energy in acetonitrile:

-1496.362426 a.u.

C -1.850710 3.541153 -0.418515  
H -1.748847 3.869305 0.621896  
H -1.263160 4.220161 -1.047243  
H -2.901957 3.592468 -0.714019  
C -0.137324 1.899427 -0.242444  
O 0.569545 2.836679 0.174991  
C 0.206958 0.537493 -0.449882  
C -0.858418 -0.413350 -0.930988  
H -0.485162 -1.087542 -1.713540  
H -1.707758 0.123516 -1.352197  
C -1.367515 -1.326194 0.182508  
H -0.570874 -1.843128 0.709898  
Cl -2.437286 -2.664205 -0.491017

Cl -2.290579 -0.428284 1.461516  
O -1.462153 2.186193 -0.590176  
C 1.540115 0.026063 -0.199892  
C 2.615390 0.827370 0.292598  
C 1.873217 -1.340154 -0.449194  
C 3.887701 0.306999 0.504313  
H 2.410990 1.869387 0.497818  
C 3.152318 -1.848768 -0.234958  
H 1.119416 -2.023055 -0.826185  
C 4.183898 -1.037272 0.245987  
H 4.667045 0.967243 0.881110  
H 3.341615 -2.898958 -0.448011  
H 5.179481 -1.436661 0.416265

## **<sup>2</sup>TS5**

B3LYP-D3BJ/BSI SCF energy in acetonitrile:

-1844.472069 a.u.

M06/BSII SCF energy in acetonitrile:

-1843.929126 a.u.

M06/BSII free energy in acetonitrile:

-1843.57145 a.u.

C 0.798258 3.792031 -1.434844  
H 1.317318 3.687823 -2.390740  
H -0.232038 4.108667 -1.616396  
H 1.308836 4.522525 -0.806850  
C 0.282965 1.481395 -1.324267  
O -0.214262 1.576828 -2.440524  
C 0.255862 0.290737 -0.445299  
C 1.159449 0.359562 0.788904  
H 0.983126 -0.501303 1.433440  
H 0.901558 1.250717 1.366070  
C 2.644006 0.475178 0.478869

H 2.872943 1.293386 -0.197025  
Cl 3.323870 -1.017603 -0.287562  
Cl 3.570191 0.832454 2.012274  
O 0.830691 2.558883 -0.698603  
C 0.091419 -1.052135 -1.090779  
C 0.254576 -1.282443 -2.468035  
C -0.246267 -2.150869 -0.277724  
C 0.090234 -2.560160 -3.005105  
H 0.509430 -0.458209 -3.120327  
C -0.411795 -3.425570 -0.815850  
H -0.391319 -1.990916 0.785183  
C -0.244268 -3.640537 -2.186312  
H 0.229928 -2.710133 -4.072349  
H -0.675041 -4.252908 -0.162258  
H -0.372900 -4.632832 -2.608811  
N -3.080875 1.269828 -0.197574  
C -2.177899 0.845252 0.784067  
H -1.870970 1.686743 1.405996  
H -0.943657 0.518915 0.154160  
C -2.570579 -0.387331 1.582944  
H -2.773056 -1.222065 0.907080  
H -3.520268 -0.171607 2.116400  
N -1.533728 -0.830301 2.516193  
C -2.980445 2.650811 -0.655125  
H -3.958576 2.983085 -1.019574  
H -2.681912 3.295166 0.174509  
H -2.257736 2.762537 -1.474467  
C -3.455685 0.346686 -1.264066  
H -2.669085 0.286340 -2.030209  
H -3.638178 -0.653885 -0.871345  
H -4.374716 0.701826 -1.739644  
C -1.907849 -2.113838 3.102339  
H -1.108256 -2.465111 3.761623



|   |           |           |          |
|---|-----------|-----------|----------|
| H | -2.840774 | -2.060820 | 3.693728 |
| H | -2.051749 | -2.855966 | 2.310664 |
| C | -1.259829 | 0.146572  | 3.565814 |
| H | -2.156999 | 0.392863  | 4.164018 |
| H | -0.500414 | -0.255513 | 4.243101 |
| H | -0.866665 | 1.073786  | 3.143418 |

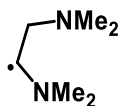

B3LYP-D3BJ/BSI SCF energy in acetonitrile:

-347.147555 a.u.

M06/BSII SCF energy in acetonitrile:

-346.927621 a.u.

M06/BSII free energy in acetonitrile:

-346.753977 a.u.

|   |           |           |           |
|---|-----------|-----------|-----------|
| N | -1.616202 | 0.023618  | -0.101189 |
| C | -0.645722 | -0.973736 | 0.020187  |
| H | -0.719732 | -1.743514 | -0.744662 |
| C | 0.708775  | -0.725818 | 0.596107  |
| H | 1.100572  | -1.687437 | 0.950874  |
| H | 0.655970  | -0.068935 | 1.483674  |
| N | 1.710323  | -0.209768 | -0.370917 |
| C | -2.899117 | -0.411807 | -0.637078 |
| H | -3.478880 | 0.458957  | -0.956932 |
| H | -2.734666 | -1.057345 | -1.504109 |
| H | -3.494872 | -0.971587 | 0.102493  |
| C | -1.739767 | 1.022509  | 0.951944  |
| H | -2.104449 | 0.589979  | 1.898258  |
| H | -0.779817 | 1.505166  | 1.142274  |
| H | -2.447071 | 1.791223  | 0.629855  |
| C | 3.046849  | -0.257815 | 0.209874  |
| H | 3.784467  | 0.087665  | -0.522427 |

|   |          |           |           |
|---|----------|-----------|-----------|
| H | 3.150680 | 0.372508  | 1.114744  |
| H | 3.297452 | -1.287143 | 0.488061  |
| C | 1.392778 | 1.145038  | -0.805896 |
| H | 1.424686 | 1.881563  | 0.020834  |
| H | 2.112236 | 1.468415  | -1.566077 |
| H | 0.391808 | 1.173298  | -1.242944 |

2

B3LYP-D3BJ/BSI SCF energy in acetonitrile:

-1497.320064 a.u.

M06/BSII SCF energy in acetonitrile:

-1497.009561 a.u.

M06/BSII free energy in acetonitrile:

-1496.844549 a.u.

|    |           |           |           |
|----|-----------|-----------|-----------|
| C  | -2.626247 | -2.842435 | -0.690405 |
| H  | -2.155786 | -3.055041 | -1.652948 |
| H  | -2.615702 | -3.742313 | -0.071288 |
| H  | -3.647838 | -2.492555 | -0.835329 |
| C  | -0.640505 | -1.971329 | 0.250287  |
| O  | -0.054912 | -2.996998 | -0.031998 |
| C  | 0.001515  | -0.801868 | 0.994335  |
| C  | -0.927487 | 0.421566  | 1.171497  |
| H  | -0.471168 | 1.124425  | 1.872333  |
| H  | -1.856760 | 0.068828  | 1.621108  |
| C  | -1.288389 | 1.155512  | -0.116177 |
| H  | -1.394833 | 0.495238  | -0.971688 |
| Cl | -0.047444 | 2.390149  | -0.582584 |
| Cl | -2.897461 | 1.986659  | 0.058941  |
| O  | -1.940279 | -1.762969 | -0.023204 |
| C  | 1.380120  | -0.470754 | 0.444763  |
| C  | 1.682771  | -0.568909 | -0.918653 |
| C  | 2.362942  | 0.001957  | 1.322081  |

C 2.941185 -0.198727 -1.394154  
H 0.936127 -0.935966 -1.616172  
C 3.620741 0.378281 0.849038  
H 2.138021 0.077614 2.382791  
C 3.913690 0.279093 -0.512868  
H 3.160278 -0.280870 -2.454843  
H 4.371680 0.742802 1.543994  
H 4.892825 0.567807 -0.883658  
H 0.146046 -1.190303 2.010779

### 7s

B3LYP-D3BJ/BSI SCF energy in acetonitrile:  
-646.728163 a.u.

M06/BSII SCF energy in acetonitrile:  
-646.510856 a.u.

M06/BSII free energy in acetonitrile:  
-646.408102 a.u.

C 0.777397 0.748451 -0.227827  
C 1.163453 1.972888 -0.605199  
H 2.209261 2.254838 -0.635230  
H 0.436630 2.721379 -0.901427  
C -0.640069 0.320771 -0.120121  
C -1.041407 -0.998018 -0.395300  
C -1.618365 1.253633 0.265346  
C -2.383988 -1.363824 -0.303688  
H -0.309941 -1.738468 -0.696154  
C -2.959409 0.885845 0.351803  
H -1.320878 2.266602 0.516705  
C -3.348602 -0.425337 0.067110  
H -2.674938 -2.386103 -0.526450  
H -3.698826 1.621139 0.654994  
H -4.392908 -0.713839 0.139996

C 1.834610 -0.267310 0.125102  
F 1.552428 -0.902543 1.287029  
F 1.946197 -1.237670 -0.823393  
F 3.062474 0.274864 0.259054

### <sup>1</sup>IM3

B3LYP-DBJ/BSI SCF energy in acetonitrile:  
-1496.810429 a.u.

M06/BSII SCF energy in acetonitrile:  
-1496.514688 a.u.

M06/BSII free energy in acetonitrile:  
-1496.362426 a.u.

### <sup>2</sup>TS6

B3LYP-D3BJ/BSI SCF energy in acetonitrile:  
-1605.771332 a.u.

M06/BSII SCF energy in acetonitrile:  
-1605.518439 a.u.

M06/BSII free energy in acetonitrile:  
-1605.407992 a.u.

C 0.362998 0.419807 -0.720346  
C -0.672321 -0.190800 -1.348093  
H -0.608441 -1.232160 -1.637060  
H -1.498277 0.379852 -1.752293  
C -2.140967 -1.008629 0.407528  
H -1.384858 -1.607345 0.903514  
Cl -3.365483 -1.944402 -0.402738  
Cl -2.690600 0.354421 1.333847  
C 1.576824 -0.284761 -0.260765  
C 2.349678 0.184473 0.819598  
C 1.986723 -1.469343 -0.904401  
C 3.478742 -0.514103 1.244076

H 2.063260 1.086729 1.345080  
C 3.112321 -2.165800 -0.474475  
H 1.433506 -1.834237 -1.763181  
C 3.865147 -1.692685 0.603785  
H 4.054923 -0.135443 2.083033  
H 3.409617 -3.073401 -0.991258  
H 4.746082 -2.233523 0.935882  
C 0.246328 1.891302 -0.426237  
F -0.799176 2.469078 -1.054662  
F 1.358233 2.569136 -0.802258  
F 0.079249 2.146500 0.901743

#### <sup>2</sup>IM4

B3LYP-D3BJ/BSI SCF energy in acetonitrile:

-1605.827805 a.u.

M06/BSII SCF energy in acetonitrile:

-1605.577305 a.u.

M06/BSII free energy in acetonitrile:

-1605.460774 a.u.

C 0.209832 0.441054 -0.524823  
C -1.066413 -0.205882 -0.983148  
H -0.857781 -0.965018 -1.743013  
H -1.734465 0.528177 -1.432841  
C -1.806368 -0.917039 0.153383  
H -1.204189 -1.683598 0.633846  
Cl -3.276669 -1.756330 -0.488706  
Cl -2.276567 0.237846 1.467330  
C 1.391063 -0.307217 -0.231332  
C 2.569807 0.301968 0.293466  
C 1.431746 -1.715350 -0.449718  
C 3.697114 -0.452139 0.580838  
H 2.595684 1.367092 0.480654

C 2.566568 -2.457091 -0.157039  
H 0.569327 -2.225794 -0.861283  
C 3.708351 -1.835381 0.362000  
H 4.577558 0.040169 0.982582  
H 2.564444 -3.527882 -0.336612  
H 4.594450 -2.419079 0.590710  
C 0.208270 1.927882 -0.334032  
F -0.962852 2.498557 -0.689150  
F 1.174224 2.543370 -1.069490  
F 0.437535 2.293110 0.957727

#### <sup>1</sup>IM5

B3LYP-D3BJ/BSI SCF energy in acetonitrile:

-1605.947971 a.u.

M06/BSII SCF energy in acetonitrile:

-1605.716144 a.u.

M06/BSII free energy in acetonitrile:

-1605.601627 a.u.

C 0.224003 0.484290 -0.534203  
C -1.048472 -0.162649 -0.988224  
H -0.861179 -0.953961 -1.727668  
H -1.728532 0.549616 -1.459528  
C -1.794283 -0.850829 0.158305  
H -1.158966 -1.516034 0.736780  
Cl -3.159848 -1.919375 -0.470008  
Cl -2.476769 0.335050 1.351094  
C 1.378341 -0.298177 -0.216930  
C 2.598423 0.263915 0.283076  
C 1.398752 -1.720489 -0.383614  
C 3.710548 -0.517119 0.570074  
H 2.663227 1.333672 0.442920  
C 2.522874 -2.488232 -0.094555

H 0.513156 -2.229738 -0.750670  
C 3.700732 -1.907429 0.388737  
H 4.607423 -0.029051 0.947532  
H 2.473379 -3.564939 -0.246756  
H 4.573520 -2.511021 0.618609  
C 0.240229 1.919047 -0.329640  
F -0.916204 2.540270 -0.700207  
F 1.243072 2.604982 -1.019789  
F 0.467974 2.357083 0.980238

**<sup>1</sup>TS7**

B3LYP-D3BJ/BSI SCF energy in acetonitrile:

-1605.929471 a.u.

M06/BSII SCF energy in acetonitrile:

-1605.715968 a.u.

M06/BSII free energy in acetonitrile:

-1605.600579 a.u.

C -1.949671 0.284048 0.818366  
C -3.171383 -0.297590 1.151919  
C -3.867228 -1.067958 0.214327  
C -3.325014 -1.255455 -1.060151  
C -2.108340 -0.662367 -1.401160  
C -1.409314 0.125123 -0.471977  
C -0.105207 0.735180 -0.805590  
C 0.205299 1.949484 -0.314997  
F 0.838528 1.571961 1.701677  
F -0.690889 2.853436 0.070647  
F 1.366183 2.551730 -0.573636  
H -1.351753 0.827115 1.544944  
H -3.574270 -0.169060 2.153388  
H -4.816254 -1.526462 0.477468  
H -3.853691 -1.859937 -1.792363

H -1.695522 -0.806791 -2.396142  
C 1.072538 -0.129145 -1.195223  
H 0.780756 -0.973538 -1.824238  
H 1.811024 0.457377 -1.748229  
C 1.756542 -0.619675 0.087426  
H 1.718249 0.157103 0.868581  
Cl 3.504110 -1.073816 -0.217265  
Cl 0.893992 -2.059702 0.793192

**F-**

B3LYP-D3BJ/BSI SCF energy in acetonitrile:

-99.900253 a.u.

M06/BSII SCF energy in acetonitrile:

-99.990886 a.u.

M06/BSII free energy in acetonitrile:

-100.005045 a.u.

F 0.000000 0.000000 0.000000

**7**

B3LYP-D3BJ/BSI SCF energy in acetonitrile:

-1505.987588 a.u.

M06/BSII SCF energy in acetonitrile:

-1505.733862 a.u.

M06/BSII free energy in acetonitrile:

-1505.619063 a.u.

C 2.228766 0.257860 -0.807228  
C 3.424181 -0.450642 -0.914864  
C 3.795888 -1.361336 0.077040  
C 2.960337 -1.556449 1.178702  
C 1.764341 -0.847574 1.289496  
C 1.382423 0.072866 0.299441

C 0.106100 0.816209 0.425517  
 C 0.010549 2.102246 0.086188  
 F 0.997911 2.877448 -0.343193  
 F -1.117219 2.805833 0.156596  
 H 1.940571 0.948637 -1.592009  
 H 4.061168 -0.297173 -1.781076  
 H 4.725365 -1.916006 -0.009856  
 H 3.239896 -2.259959 1.957443  
 H 1.132774 -1.002512 2.158594  
 C -1.148992 0.131357 0.928885  
 H -0.894565 -0.761753 1.500822  
 H -1.715878 0.796519 1.586204  
 C -2.083305 -0.254593 -0.212598  
 H -2.383028 0.600033 -0.814100  
 Cl -3.615274 -0.969679 0.447558  
 Cl -1.306741 -1.425438 -1.355212

**13s**

B3LYP-D3BJ/BSI SCF energy in acetonitrile:

-540.779814 a.u.

M06/BSII SCF energy in acetonitrile:

-540.410329 a.u.

M06/BSII free energy in acetonitrile:

-540.233526 a.u.

C -0.000109 2.505549 -0.000217  
 H 0.922331 3.072349 -0.079006  
 H -0.922585 3.072298 0.078551  
 C -0.000075 1.159766 -0.000182  
 C -1.276814 0.395666 0.041050  
 C -1.387819 -0.777519 0.807573  
 C -2.406388 0.841109 -0.665607  
 C -2.595916 -1.469809 0.881514

H -0.525111 -1.140215 1.357088  
 C -3.614049 0.147130 -0.593981  
 H -2.327628 1.727738 -1.286908  
 C -3.714462 -1.010393 0.181544  
 H -2.663795 -2.369075 1.486934  
 H -4.473956 0.504951 -1.152885  
 H -4.653400 -1.553542 0.234449  
 C 1.276807 0.395799 -0.041193  
 C 1.388275 -0.776872 -0.808481  
 C 2.405899 0.840819 0.666390  
 C 2.596428 -1.469038 -0.882217  
 H 0.525876 -1.139181 -1.358739  
 C 3.613662 0.146914 0.594989  
 H 2.326819 1.727041 1.288237  
 C 3.714552 -1.010071 -0.181220  
 H 2.664766 -2.367880 -1.488220  
 H 4.473217 0.504410 1.154647  
 H 4.653518 -1.553198 -0.233926

**<sup>2</sup>TS8**

B3LYP-D3BJ/BSI SCF energy in acetonitrile:

-1499.8245 a.u.

M06/BSII SCF energy in acetonitrile:

-1499.419832 a.u.

M06/BSII free energy in acetonitrile:

-1499.23291 a.u.

C -2.042354 1.561879 -0.378093  
 H -1.282756 2.137389 -0.894179  
 C -0.550502 0.646907 1.474266  
 H -1.454332 0.151762 1.809280  
 H -0.388644 1.659532 1.826377  
 C 0.409332 -0.032214 0.794893

C 0.192495 -1.456854 0.440587  
 C 0.544348 -1.946512 -0.830599  
 C -0.414180 -2.339879 1.350809  
 C 0.282649 -3.269230 -1.183361  
 H 1.007124 -1.278773 -1.549733  
 C -0.671872 -3.664268 0.998996  
 H -0.667911 -1.985935 2.345326  
 C -0.326623 -4.134223 -0.270407  
 H 0.551268 -3.624031 -2.174245  
 H -1.135142 -4.331861 1.719766  
 H -0.525767 -5.166122 -0.544220  
 C 1.652789 0.641279 0.350702  
 C 2.860422 -0.073459 0.240681  
 C 1.668275 2.017682 0.056151  
 C 4.039427 0.565932 -0.139504  
 H 2.875287 -1.134100 0.467671  
 C 2.846794 2.655304 -0.326674  
 H 0.747919 2.588507 0.115617  
 C 4.038849 1.933068 -0.426421  
 H 4.960886 -0.004893 -0.209453  
 H 2.832377 3.716846 -0.556514  
 H 4.956137 2.429828 -0.728318  
 Cl -2.611059 0.182161 -1.269890  
 Cl -3.251031 2.536038 0.414624

**<sup>2</sup>IM6**

B3LYP-D3BJ/BSI SCF energy in acetonitrile:

-1499.881969 a.u.

M06/BSII SCF energy in acetonitrile:

-1499.479758 a.u.

M06/BSII free energy in acetonitrile:

-1499.28907 a.u.

C -1.025679 1.959287 -0.255131  
 H -0.256719 2.210150 -0.980606  
 C -0.494800 1.148140 0.930419  
 H -1.340765 0.899786 1.574281  
 H 0.155281 1.819479 1.498024  
 C 0.256923 -0.087220 0.499919  
 C -0.488507 -1.332489 0.328944  
 C -0.200210 -2.219590 -0.735418  
 C -1.555758 -1.676407 1.190393  
 C -0.931443 -3.388866 -0.918952  
 H 0.582132 -1.963307 -1.440938  
 C -2.278153 -2.852003 1.009802  
 H -1.803781 -1.029506 2.024924  
 C -1.972596 -3.716870 -0.045396  
 H -0.695652 -4.041238 -1.754853  
 H -3.082766 -3.096200 1.697443  
 H -2.541592 -4.630542 -0.188321  
 C 1.673961 0.005930 0.236259  
 C 2.505336 -1.148347 0.213370  
 C 2.316543 1.260116 0.045117  
 C 3.871591 -1.053541 -0.016713  
 H 2.070266 -2.120390 0.411814  
 C 3.683723 1.345504 -0.189972  
 H 1.739095 2.177051 0.065701  
 C 4.474032 0.191853 -0.229660  
 H 4.475322 -1.956607 -0.017887  
 H 4.137423 2.320219 -0.344952  
 H 5.541779 0.262602 -0.412730  
 Cl -2.302214 1.070963 -1.180463  
 Cl -1.697186 3.548774 0.326946

**<sup>1</sup>IM7-**

B3LYP-D3BJ/BSI SCF energy in acetonitrile:

-1499.98448 a.u.

M06/BSII SCF energy in acetonitrile:

-1499.597199 a.u.

M06/BSII free energy in acetonitrile:

-1499.407352 a.u.

|   |           |           |           |
|---|-----------|-----------|-----------|
| C | -0.204581 | -2.159910 | 0.248961  |
| H | 0.600004  | -2.070189 | 0.972864  |
| C | -0.074405 | -1.198767 | -0.932323 |
| H | -0.965591 | -1.315872 | -1.552926 |
| H | 0.765142  | -1.577011 | -1.529194 |
| C | 0.159878  | 0.218020  | -0.475762 |
| C | -0.985401 | 1.093973  | -0.319833 |
| C | -1.022002 | 2.166335  | 0.622547  |
| C | -2.189850 | 0.921804  | -1.067159 |
| C | -2.125654 | 3.000689  | 0.768572  |
| H | -0.171828 | 2.317542  | 1.278140  |
| C | -3.292297 | 1.755534  | -0.914214 |
| H | -2.255225 | 0.123228  | -1.799282 |
| C | -3.280761 | 2.817257  | -0.000768 |
| H | -2.090334 | 3.793963  | 1.512952  |
| H | -4.175143 | 1.577160  | -1.525135 |
| H | -4.142372 | 3.468057  | 0.114764  |
| C | 1.517951  | 0.608854  | -0.206150 |
| C | 1.949083  | 1.974475  | -0.108433 |
| C | 2.585795  | -0.345741 | -0.106863 |
| C | 3.275630  | 2.332491  | 0.090068  |
| H | 1.220924  | 2.766978  | -0.234193 |
| C | 3.912346  | 0.025664  | 0.090222  |
| H | 2.370911  | -1.406189 | -0.179592 |
| C | 4.288441  | 1.368522  | 0.205113  |
| H | 3.527922  | 3.390284  | 0.142787  |
| H | 4.666937  | -0.755688 | 0.162942  |

H 5.322960 1.653449 0.371075

Cl -1.735001 -1.915321 1.190104

Cl -0.133195 -3.934145 -0.313579

**<sup>1</sup>TS9-**

B3LYP-D3BJ/BSI SCF energy in acetonitrile:

-1499.980784 a.u.

M06/BSII SCF energy in acetonitrile:

-1499.587983 a.u.

M06/BSII free energy in acetonitrile:

-1499.399029 a.u.

|   |           |           |           |
|---|-----------|-----------|-----------|
| C | 0.343431  | 1.907524  | -0.243655 |
| H | 1.051177  | 1.562415  | -0.985415 |
| C | 0.265964  | 1.152925  | 1.047126  |
| H | -0.546440 | 1.537730  | 1.665029  |
| H | 1.200343  | 1.294837  | 1.599417  |
| C | 0.072879  | -0.249145 | 0.543056  |
| C | -1.286075 | -0.739375 | 0.340174  |
| C | -1.631285 | -1.618662 | -0.721237 |
| C | -2.361429 | -0.326571 | 1.170380  |
| C | -2.933619 | -2.069778 | -0.915196 |
| H | -0.861114 | -1.926694 | -1.420151 |
| C | -3.665077 | -0.771992 | 0.969761  |
| H | -2.166048 | 0.346049  | 1.999643  |
| C | -3.969757 | -1.655770 | -0.070953 |
| H | -3.145537 | -2.736589 | -1.747830 |
| H | -4.450901 | -0.431839 | 1.640226  |
| H | -4.986504 | -2.004862 | -0.224775 |
| C | 1.255516  | -1.026346 | 0.238828  |
| C | 1.226620  | -2.446043 | 0.085330  |
| C | 2.557041  | -0.441267 | 0.165100  |
| C | 2.374901  | -3.193709 | -0.145311 |

H 0.282124 -2.968552 0.183496  
C 3.701831 -1.199540 -0.065262  
H 2.677636 0.631146 0.272922  
C 3.634293 -2.585801 -0.232878  
H 2.286482 -4.273499 -0.245390  
H 4.662970 -0.692824 -0.120496  
H 4.528463 -3.172598 -0.420071  
Cl -1.196063 2.295096 -1.029483  
Cl 1.311118 3.847055 0.136059

## 11

B3LYP-D3BJ/BSI SCF energy in acetonitrile:

-1039.681766 a.u.

M06/BSII SCF energy in acetonitrile:

-1039.289279 a.u.

M06/BSII free energy in acetonitrile:

-1039.096221 a.u.

C -0.055356 2.053846 -0.015241  
H 0.785380 2.550560 -0.483724  
C -0.000794 1.697035 1.427459  
H -0.929884 1.734753 1.986102  
H 0.885606 1.975667 1.989282  
C 0.109982 0.591569 0.379179  
C -1.063699 -0.334387 0.224513  
C -1.520753 -0.679840 -1.055102  
C -1.679240 -0.908096 1.341748  
C -2.579085 -1.574282 -1.212577  
H -1.041939 -0.244610 -1.926850  
C -2.738766 -1.805188 1.187072  
H -1.326078 -0.651335 2.336065  
C -3.191749 -2.139501 -0.090408  
H -2.925878 -1.829928 -2.209650

H -3.207483 -2.242742 2.063785  
H -4.016347 -2.835770 -0.212175  
C 1.471212 -0.014866 0.129635  
C 1.604721 -1.363312 -0.234846  
C 2.644406 0.747987 0.268428  
C 2.861975 -1.927239 -0.460989  
H 0.721756 -1.981710 -0.342280  
C 3.899508 0.185537 0.039497  
H 2.593141 1.791140 0.563078  
C 4.016974 -1.156758 -0.328065  
H 2.933124 -2.974397 -0.741068  
H 4.787939 0.799989 0.153490  
H 4.994879 -1.594935 -0.503874  
Cl -1.584131 2.662841 -0.722000

## 25s

B3LYP-D3BJ/BSI SCF energy in acetonitrile:

-670.370277 a.u.

M06/BSII SCF energy in acetonitrile:

-670.02241 a.u.

M06/BSII free energy in acetonitrile:

-669.83925 a.u.

C -1.985110 1.055795 -0.483214  
C -1.642666 -0.254576 -0.125085  
C -2.637594 -1.133737 0.322503  
C -3.955433 -0.695750 0.445416  
C -4.293907 0.612993 0.090945  
C -3.309368 1.483592 -0.382145  
H -1.224735 1.733827 -0.857271  
H -2.371430 -2.154676 0.577303  
H -4.718738 -1.376792 0.809717  
H -5.322289 0.950922 0.177644



H -3.571366 2.496280 -0.673517  
 C -0.256344 -0.801179 -0.327587  
 O -0.091280 -1.800126 -1.015380  
 N 0.792514 -0.096642 0.259607  
 C 0.556980 0.973292 1.249966  
 H -0.308537 0.712545 1.859475  
 H 1.425535 1.038991 1.904812  
 H 0.392662 1.948800 0.789609  
 C 2.141007 -0.531721 0.077027  
 O 2.453395 -1.707524 0.059701  
 C 3.163680 0.544630 -0.112415  
 C 4.559609 0.202088 0.329448  
 H 4.589504 -0.003177 1.405864  
 H 4.911961 -0.702808 -0.175641  
 H 5.249241 1.020451 0.110415  
 C 2.839760 1.674221 -0.755371  
 H 3.592170 2.424134 -0.983442  
 H 1.827812 1.871319 -1.093713

**<sup>2</sup>TS10**

B3LYP-D3BJ/BSI SCF energy in acetonitrile:

-1629.41952 a.u.

M06/BSII SCF energy in acetonitrile:

-1629.035751 a.u.

M06/BSII free energy in acetonitrile:

-1628.843334 a.u.

C 2.377204 0.752012 0.898164  
 C 1.825108 0.432285 -0.350418  
 C 2.573141 -0.314045 -1.270748  
 C 3.867375 -0.719137 -0.954841  
 C 4.415173 -0.398710 0.291242  
 C 3.667063 0.331203 1.218494

H 1.791208 1.309225 1.621636  
 H 2.127056 -0.571045 -2.225520  
 H 4.447789 -1.288101 -1.674706  
 H 5.421982 -0.720626 0.540186  
 H 4.086723 0.569872 2.190880  
 C 0.413946 0.766349 -0.693413  
 O -0.252808 0.064068 -1.440953  
 N -0.135607 1.918244 -0.096348  
 C 0.609676 3.187185 -0.112990  
 H 0.236196 3.827728 -0.915805  
 H 0.488232 3.706571 0.840187  
 H 1.664646 2.985857 -0.280826  
 C -1.535592 2.037406 -0.000755  
 O -2.079390 3.116985 -0.217406  
 C -2.320376 0.896933 0.539077  
 C -3.766935 0.858986 0.145028  
 H -4.250375 1.821155 0.343570  
 H -3.869237 0.670131 -0.930741  
 H -4.299845 0.072568 0.683677  
 C -1.799298 0.052944 1.477414  
 H -2.479674 -0.493136 2.121051  
 H -0.779280 0.164088 1.828671  
 C -1.469210 -2.123094 0.677921  
 H -1.960796 -2.582685 1.528552  
 Cl 0.233569 -2.508382 0.629463  
 Cl -2.360712 -2.368654 -0.800907

**<sup>2</sup>IM8**

B3LYP-D3BJ/BSI SCF energy in acetonitrile:

-1629.478835 a.u.

M06/BSII SCF energy in acetonitrile:

-1629.099035 a.u.

M06/BSII free energy in acetonitrile:

-1628.901217 a.u.

|    |           |           |           |
|----|-----------|-----------|-----------|
| C  | 2.521396  | -0.140674 | 0.932872  |
| C  | 2.147679  | 0.275943  | -0.353793 |
| C  | 2.553419  | -0.468948 | -1.469132 |
| C  | 3.282242  | -1.643711 | -1.297874 |
| C  | 3.639168  | -2.064911 | -0.013079 |
| C  | 3.269056  | -1.305964 | 1.099383  |
| H  | 2.245763  | 0.450637  | 1.799606  |
| H  | 2.278198  | -0.128052 | -2.461611 |
| H  | 3.574832  | -2.229254 | -2.164032 |
| H  | 4.210496  | -2.978727 | 0.119372  |
| H  | 3.561828  | -1.619121 | 2.096632  |
| C  | 1.391008  | 1.546015  | -0.589699 |
| O  | 1.708745  | 2.316579  | -1.491852 |
| N  | 0.356500  | 1.864553  | 0.279019  |
| C  | -0.105530 | 3.255648  | 0.279296  |
| H  | -0.516449 | 3.509422  | -0.700483 |
| H  | -0.873163 | 3.359064  | 1.042955  |
| H  | 0.721149  | 3.935082  | 0.501198  |
| C  | -0.240886 | 0.954701  | 1.191897  |
| O  | -0.591867 | 1.342818  | 2.307522  |
| C  | -0.484274 | -0.416450 | 0.759773  |
| C  | -0.601397 | -1.453047 | 1.825390  |
| H  | 0.050233  | -1.221119 | 2.671687  |
| H  | -1.627096 | -1.510130 | 2.215394  |
| H  | -0.350158 | -2.442093 | 1.432244  |
| C  | -0.812129 | -0.758684 | -0.663904 |
| H  | -0.423319 | -1.751326 | -0.914455 |
| H  | -0.371641 | -0.050933 | -1.368252 |
| C  | -2.301286 | -0.765339 | -1.021630 |
| H  | -2.435748 | -0.944584 | -2.085681 |
| Cl | -3.059347 | 0.846907  | -0.683025 |

Cl -3.236315 -2.070048 -0.184037

## **<sup>2</sup>TS11**

B3LYP-D3BJ/BSI SCF energy in acetonitrile:

-1629.463413 a.u.

M06/BSII SCF energy in acetonitrile:

-1629.080913 a.u.

M06/BSII free energy in acetonitrile:

-1628.881892 a.u.

|   |           |           |           |
|---|-----------|-----------|-----------|
| C | 1.885451  | -0.221418 | 1.096965  |
| C | 2.115417  | 0.009241  | -0.301180 |
| C | 2.554878  | -1.019988 | -1.127089 |
| C | 2.797382  | -2.295900 | -0.605452 |
| C | 2.601366  | -2.537252 | 0.767569  |
| C | 2.196073  | -1.519013 | 1.613230  |
| H | 1.982989  | 0.615938  | 1.783971  |
| H | 2.676887  | -0.822665 | -2.186976 |
| H | 3.131940  | -3.095249 | -1.258223 |
| H | 2.805061  | -3.524239 | 1.172629  |
| H | 2.107673  | -1.694801 | 2.679973  |
| C | 1.698650  | 1.282624  | -0.926294 |
| O | 2.215809  | 1.710413  | -1.953121 |
| N | 0.660193  | 1.994202  | -0.296759 |
| C | 0.415986  | 3.370805  | -0.743201 |
| H | -0.656884 | 3.560794  | -0.759518 |
| H | 0.890897  | 4.086227  | -0.065711 |
| H | 0.833856  | 3.479914  | -1.740884 |
| C | -0.117435 | 1.555214  | 0.791188  |
| O | -0.747287 | 2.380823  | 1.443558  |
| C | -0.187222 | 0.096170  | 1.118272  |
| C | -0.589033 | -0.188904 | 2.541575  |
| H | 0.043458  | 0.356416  | 3.248018  |

H -1.624402 0.113493 2.727965  
H -0.507250 -1.259250 2.748172  
C -0.740801 -0.829610 0.048685  
H -0.866565 -1.832555 0.463381  
H -0.046023 -0.906942 -0.791821  
C -2.053779 -0.367990 -0.575092  
H -1.989629 0.628601 -1.006051  
Cl -3.427966 -0.318449 0.601173  
Cl -2.490453 -1.469719 -1.957418

**2IM9**

B3LYP-D3BJ/BSI SCF energy in acetonitrile:

-1629.487668 a.u.

M06/BSII SCF energy in acetonitrile:

-1629.109316 a.u.

M06/BSII free energy in acetonitrile:

-1628.905896 a.u.

C 1.506235 0.650913 -0.863572  
C 2.030143 -0.387214 0.085740  
C 3.054306 -0.123378 0.974382  
C 3.627529 1.152141 1.060313  
C 3.142678 2.205332 0.231175  
C 2.140612 1.996029 -0.667669  
H 1.736692 0.327291 -1.896200  
H 3.392291 -0.923200 1.625682  
H 4.425815 1.343160 1.769271  
H 3.587448 3.192492 0.320613  
H 1.800666 2.806759 -1.302858  
C 1.405761 -1.708157 0.076410  
O 1.855874 -2.687111 0.671547  
N 0.234069 -1.830491 -0.695564  
C -0.307452 -3.175948 -0.893616

H -0.811433 -3.212666 -1.857475  
H 0.513381 -3.888934 -0.860818  
H -1.027552 -3.422370 -0.106688  
C -0.545187 -0.759806 -1.131600  
O -1.580430 -0.966492 -1.747512  
C -0.064189 0.668357 -0.817087  
C -0.609691 1.601284 -1.907246  
H -0.117125 1.391021 -2.862119  
H -1.679348 1.456993 -2.040295  
H -0.427165 2.645957 -1.646342  
C -0.476205 1.134810 0.610031  
H -0.330506 2.219108 0.648590  
H 0.214560 0.707352 1.343889  
C -1.855086 0.879146 1.195578  
H -1.928795 1.381334 2.156868  
Cl -2.150032 -0.875698 1.573415  
Cl -3.231597 1.535517 0.218792

**I**

B3LYP-D3BJ/BSI SCF energy in acetonitrile:

-11.397842 a.u.

M06/BSII SCF energy in acetonitrile:

-11.36260072 a.u.

M06/BSII free energy in acetonitrile:

-11.38010072 a.u.

I 0.000000 0.000000 0.000000

**1IM10+**

B3LYP-D3BJ/BSI SCF energy in acetonitrile:

-1629.31759 a.u.

M06/BSII SCF energy in acetonitrile:

-1628.928557 a.u.

M06/BSII free energy in acetonitrile:

-1628.722525 a.u.

|   |           |           |           |
|---|-----------|-----------|-----------|
| C | 1.498796  | 0.703022  | -0.754868 |
| C | 2.044936  | -0.360189 | 0.101348  |
| C | 3.109944  | -0.138750 | 0.931808  |
| C | 3.668454  | 1.155904  | 1.005367  |
| C | 3.180175  | 2.230710  | 0.244436  |
| C | 2.114769  | 2.027752  | -0.598678 |
| H | 1.793995  | 0.420867  | -1.792589 |
| H | 3.507091  | -0.943992 | 1.537953  |
| H | 4.504297  | 1.323318  | 1.678102  |
| H | 3.642251  | 3.207156  | 0.328829  |
| H | 1.736052  | 2.840879  | -1.207736 |
| C | 1.433709  | -1.720102 | 0.042396  |
| O | 1.975914  | -2.681466 | 0.567970  |
| N | 0.245303  | -1.831819 | -0.661059 |
| C | -0.296062 | -3.181521 | -0.861887 |
| H | -0.850645 | -3.195783 | -1.797211 |
| H | 0.531688  | -3.886412 | -0.892761 |
| H | -0.966581 | -3.443074 | -0.038478 |
| C | -0.535363 | -0.752029 | -1.101180 |
| O | -1.564444 | -0.958764 | -1.714956 |
| C | -0.077807 | 0.682395  | -0.778512 |
| C | -0.596081 | 1.608166  | -1.887616 |
| H | -0.080137 | 1.399260  | -2.828986 |
| H | -1.660459 | 1.448243  | -2.040180 |
| H | -0.437151 | 2.654614  | -1.621758 |
| C | -0.532934 | 1.151142  | 0.641692  |
| H | -0.415251 | 2.238986  | 0.668974  |
| H | 0.144232  | 0.746092  | 1.400017  |
| C | -1.926070 | 0.865700  | 1.182804  |

H -2.032718 1.374614 2.137605

Cl -2.188115 -0.891144 1.562142

Cl -3.279200 1.486826 0.159556

## 25

B3LYP-D3BJ/BSI SCF energy in acetonitrile:

-1628.935218 a.u.

M06/BSII SCF energy in acetonitrile:

-1628.557001 a.u.

M06/BSII free energy in acetonitrile:

-1628.361711 a.u.

|   |           |           |           |
|---|-----------|-----------|-----------|
| C | 1.441585  | -0.848892 | 0.190029  |
| C | 2.159508  | 0.305195  | -0.155466 |
| C | 3.504915  | 0.225614  | -0.538727 |
| C | 4.146738  | -1.006685 | -0.579279 |
| C | 3.437367  | -2.161936 | -0.239000 |
| C | 2.096097  | -2.083988 | 0.137413  |
| H | 4.027112  | 1.141166  | -0.793172 |
| H | 5.190146  | -1.069697 | -0.871434 |
| H | 3.928942  | -3.129731 | -0.266772 |
| H | 1.562622  | -2.993200 | 0.388493  |
| C | 1.531641  | 1.646005  | -0.102449 |
| O | 2.083826  | 2.657344  | -0.521841 |
| N | 0.284947  | 1.736875  | 0.518970  |
| C | -0.238137 | 3.084029  | 0.761976  |
| H | -1.274824 | 2.996391  | 1.075830  |
| H | 0.337087  | 3.587373  | 1.544299  |
| H | -0.164220 | 3.661537  | -0.159105 |
| C | -0.398462 | 0.646991  | 1.057970  |
| O | -1.291688 | 0.813768  | 1.871885  |
| C | -0.045002 | -0.745536 | 0.514685  |
| C | -0.464381 | -1.792879 | 1.559716  |

H 0.228538 -1.771766 2.405497  
H -1.463386 -1.580766 1.931016  
H -0.457939 -2.796391 1.130644  
C -0.753508 -0.966400 -0.870301  
H -0.595566 -2.017493 -1.132690  
H -0.233314 -0.374110 -1.628948  
C -2.231263 -0.690253 -1.115863  
H -2.482263 -1.040767 -2.114084  
Cl -2.632606 1.081356 -1.141652  
Cl -3.370762 -1.564129 -0.015226

### HCl...TMEDA

B3LYP-D3BJ/BSI SCF energy in acetonitrile:

-808.663058 a.u.

M06/BSII SCF energy in acetonitrile:

-808.429544 a.u.

M06/BSII free energy in acetonitrile:

-808.231333 a.u.

H 0.938876 -1.112084 -1.960416  
H 2.590815 -1.508991 -1.434953  
C -3.488127 -0.199144 -0.726850  
H -4.442073 -0.086093 -0.201865  
H -3.427724 0.597225 -1.491618  
H -3.492774 -1.165046 -1.241305  
C -2.428974 1.101960 0.986110  
H -2.319620 1.988483 0.334563  
H -3.381713 1.184527 1.518269  
H -1.627748 1.132807 1.729388  
Cl 2.038761 2.059806 -0.323270  
H 1.546292 0.177544 -0.072348

N 1.318706 -0.849212 0.104269  
C -0.095892 -0.912965 0.596028  
H -0.115284 -0.330026 1.517815  
H -0.317130 -1.955439 0.836786  
C -1.099172 -0.357392 -0.416005  
H -1.236027 -1.077743 -1.226158  
H -0.706264 0.572291 -0.864299  
N -2.392760 -0.151678 0.236829  
C 2.266617 -1.313136 1.154597  
H 3.284066 -1.169481 0.790707  
H 2.106326 -0.718760 2.054327  
H 2.084011 -2.368924 1.361028  
C 1.534057 -1.577478 -1.176259  
H 1.244359 -2.621831 -1.047738

## 16. References

1. Fan, X., Lei, T., Chen, B., Tung, C.-H. & Wu, L.-Z. Photocatalytic C-C Bond Activation of Oxime Ester for Acyl Radical Generation and Application. *Org. Lett.*, 2019, **21**, 4153–4158.
2. Fabry, D. C., Stodulski, M., Hoerner, D.-C. S. & Gulder, T. Metal-Free Synthesis of 3,3-Disubstituted Oxindoles by Iodine(III)-Catalyzed Bromocarbocyclizations. *Chem. Eur. J.*, 2019, **18**, 10834 – 10838.
3. Mai, W.-P. et al. Silver-Catalyzed Radical Tandem Cyclization: An Approach to Direct Synthesis of 3-Acyl-4-arylquinolin-2(1H)-ones. *J. Org. Chem.*, 2014, **79**, 8094–8102.
4. Pankajakshan, S., Xu, Y.-H., Cheng, J.-K., Low, M.-T. & Loh, T.-P. Palladium-Catalyzed Direct C-H Arylation of Enamides with Simple Arenes. *Angew. Chem. Int. Ed.*, 2012, **51**, 5701–5705.
5. Boche, G. et al. Crystal and Electronic Structure of Stable Nitrenium Ions. A Comparison with Structurally Related Carbenes. *J. Am. Chem. Soc.*, 2017, **118**, 4925–4930.
6. Pogoreltsev, A., Tulchinsky, Y., Fridman, N. & Gandelman, M. Nitrogen Lewis Acids. *J. Am. Chem. Soc.*, 2017, **139**, 4062–4067.
7. Wang, C. et al. Visible-Light-Promoted C(sp<sup>3</sup>)-H Alkylation by Intermolecular Charge Transfer: Preparation of Unnatural  $\alpha$ -Amino Acids and Late-Stage Modification of Peptides. *Angew. Chem. Int. Ed.*, 2020, **59**, 7461– 7466.
8. Ionita, P., Conte, M., Gilbert, B. C. & Chechik, V. Gold nanoparticle-initiated free radical oxidations and halogen abstractions. *Org. Biomol. Chem.*, 2007, **5**, 3504-3509.
9. Muralirajan, K., Kancherla, R., Gimnkhan, A. & Rueping, M. Unactivated Alkyl Chloride Reactivity in Excited-State Palladium Catalysis. *Org. Lett.*, 2021, **23**, 6905–6910.
10. Wang, S. C. et al. T. A metal-free synthesis of oxindoles by a radical addition-cyclization onto N-arylacrylamides with xanthates. *Tetrahedron.*, 2015, **71**, 1869–1875.

11. Su, L., Sun, H., Liu, J. & Wang, C. M. Construction of Quaternary Carbon Center via NHC Catalysis Initiated by an Intermolecular Heck-Type Alkyl Radical Addition. *Org. Lett.*, 2021, **23**, 4662–4666.
12. Schweitzer-Chaput, B., Horwitz, M. A., de Pedro Beato, E. & Melchiorre, P. Photochemical generation of radicals from alkyl electrophiles using a nucleophilic organic catalyst. *Nat. Chem.*, 2019, 129–135.
13. Zhang, C. S., Bao, L., Chen, K. Q., Wang, Z. X. & Chen, X. Y. Photoinduced  $\alpha$ -alkenylation of Katritzky salts: synthesis of  $\beta$ ,  $\gamma$ -unsaturated esters. *Org. Lett.*, 2021, **23**, 1577–1581.
14. Lee, H. S., Kim, K. H., Kim, S. H. & Kim, J. N. Palladium-Catalyzed, Chelation-Assisted Stereo- and Regioselective Synthesis of Tetrasubstituted Olefins by Oxidative Heck Arylation. *Adv. Synth. Catal.*, 2012, **354**, 2419–2426.
15. Hirata, G., Shimada, T. & Nishikata, T. Organo-photoredox-Catalyzed Atom-Transfer Radical Substitution of Alkenes with  $\alpha$ -Carbonyl Alkyl Halides. *Org. Lett.*, 2020, **22**, 8952 – 8956.
16. Okumura, S. & Uozumi, Y. Photocatalytic Carbinol Cation/Anion Umpolung: Direct Addition of Aromatic Aldehydes and Ketones to Carbon Dioxide. *Org. Lett.*, 2021, **23**, 7194 – 7198.
17. Santra, S. K. & Szpilman, A. M. Visible-Spectrum Solar-Light-Mediated Benzylic C–H Oxygenation Using 9, 10-Dibromoanthracene As an Initiator. *J. Org. Chem.*, 2021, **86**, 1164–1171.
18. Spinnato, D., Schweitzer-Chaput, B., Goti, G., Ošek, M. & Melchiorre, P. A. Photochemical Organocatalytic Strategy for the  $\alpha$ -Alkylation of Ketones by using Radicals. *Angew. Chem. Int. Ed.*, 2020, **59**, 9485 –9490.
19. Klauck, F. J. R., James, M. J. & Glorius, F. Deaminative Strategy for the Visible-Light-Mediated Generation of Alkyl Radicals. *Angew. Chem. Int. Ed.*, 2017, **56**, 12336–12339.
20. Gagnot, G. et al. Core-Modified Coelenterazine Luciferin Analogues: Synthesis and Chemiluminescence Properties. *Chem. Eur. J.*, 2021, **27**, 2112–2123.
21. Marenich, A. V., Cramer, C. J. & Truhlar, D. G. G. Universal Solvation Model Based on Solute Electron Density and on a Continuum Model of the Solvent Defined by the Bulk

- Dielectric Constant and Atomic Surface Tensions. *J. Phys. Chem. B.*, 2009, **113**, 6378-6396.
22. Lee, C. T., Yang, W. T. & Parr, R. G. Development of the Colle-Salvetti correlation-energy formula into a functional of the electron density. *Phys. Rev. B: Condens. Matter Mater. Phys.*, 1988, **37**, 785-789.
23. Miehlich, B., Savin, A., Stoll, H. & Preuss, H. Results obtained with the correlation energy density functionals of Becke and Lee, Yang and Parr. *Chem. Phys. Lett.*, 1989, **157**, 200-206.
24. Becke, A. D. Density-functional thermochemistry. III. The role of exact exchange. *J. Chem. Phys.*, 1993, **98**, 5648-5652.
25. Grimme, S., Antony, J., Ehrlich, S. & Krieg, H. A consistent and accurate ab initio parametrization of density functional dispersion correction (DFT-D) for the 94 elements H-Pu. *J. Chem. Phys.*, 2010, **132**, 154104-154119.
26. Dolg, M., Wedig, U., Stoll, H. & Preuss, H. Energy-Adjusted Ab Initio Pseudopotentials for the First Row Transition Elements. *J. Chem. Phys.*, 1987, **86**, 866-872.
27. Andrae, D., Häussermann, U., Dolg, M., Stoll, H. & Preuss, H. Energy-Adjusted Ab Initio Pseudopotentials for the Second and Third Row Transition Elements. *Theor. Chim. Acta.*, 1990, **77**, 123-141.
28. Roy, L. E., Hay, P. J. & Martin, R. L. Revised Basis Sets for the LANL Effective Core Potentials. *J. Chem. Theory Comput.*, 2008, **4**, 1029-1031.
29. Zhao, Y. & Truhlar, D. G. The M06 Suite of Density Functionals for Main Group Thermochemistry, Thermochemical Kinetics, Noncovalent Interactions, Excited States, and Transition Elements: Two New Functionals and Systematic Testing of Four M06-Class Functionals and 12 other Functionals. *Theor. Chem. Acc.*, 2008, **120**, 215-241.
30. Zhao, Y. & Truhlar, D. G. Density Functionals with Broad Applicability in Chemistry. *Acc. Chem. Res.*, 2008, **41**, 157-167.



31. Zhao, Y. & Truhlar, D. G. Benchmark Energetic Data in a Model System for Grubbs II Metathesis Catalysis and Their Use for the Development, Assessment, and Validation of Electronic Structure Methods. *J. Chem. Theory Comput.*, 2009, **5**, 324-333.
32. Runge, E. & Gross, E. K. U., Density-Functional Theory for Time-Dependent Systems. *Phys. Rev. Lett.*, 1984, **52**, 997-1000.
33. Casida, M. E. Time-Dependent Density Functional Response Theory for Molecules. In *Recent Advances in Density Functional Methods*, WORLD SCIENTIFIC; 1995, Vol.1, pp 155-192.
34. Bauernschmitt, R. & Ahlrichs, R., Treatment of electronic excitations within the adiabatic approximation of time dependent density functional theory. *Chem. Phys. Lett.*, 1996, **256**, 454-464.
35. Stratmann, R. E., Scuseria, G. E. & Frisch, M. J. An efficient implementation of time-dependent density-functional theory for the calculation of excitation energies of large molecules. *J. Chem. Phys.*, 1998, **109**, 8218-8224.
36. Fukui, K. The Path of Chemical Reactions —The IRC Approach *Acc. Chem. Res.*, 1981, **14**, 363–368.
37. Huang, D. et al. Kinetics and mechanistic analysis of an extremely rapid carbon dioxide fixation reaction. *Proc.Natl. Acad. Sci. U.S.A.*, 2011, **108**, 1222-1227.
38. Liang, Y.; Liu, S., Xia, Y., Li, Y. & Yu, Z.-X. Mechanism, Regioselectivity, and the Kinetics of Phosphine-Catalyzed [3+2] Cycloaddition Reactions of Allenolates and Electron-Deficient Alkenes. *Chem.-Eur. J.*, 2008, **14**, 4361-4373.
39. Schoenebeck, F. & Houk, K. N. Ligand-controlled regioselectivity in palladium-catalyzed cross coupling reactions. *J. Am. Chem. Soc.*, 2010, **132**, 2496–2497.
40. Liu, B. et al.. DFT Studies on the Mechanisms of the Platinum-Catalyzed Diboration of Acyclic  $\alpha$ ,  $\beta$ -Unsaturated Carbonyl Compounds. *Organometallics*, 2012, **31**, 3410–3425.
41. Zhou, Q. & Li, Y. The Real Role of N-Heterocyclic Carbene in Reductive Functionalization of CO<sub>2</sub>: An Alternative Understanding from Density Functional Theory Study. *J. Am. Chem. Soc.*, 2015, **137**, 10182–10189.

42. Zhang, C., Lu, Y., Zhao, R., Chen, X.-Y. & Wang, Z.-X. How does the nickel catalyst control the doubly enantioconvergent coupling of racemic alkyl nucleophiles and electrophiles? The rebound mechanism. *Org. Chem. Front.*, 2020, **7**, 3411-3419.
43. Frisch, M. J. et al. Gaussian 09, Rev. A.01; Gaussian, Inc.: Wallingford, CT, 2010.
44. Legault, C. Y. *CYLView*, version 1.0 b; Universite de Sherbrooke: Sherbrooke, Quebec, Canada, 2009. <http://www.cylview.org>.
45. Marcus, R. A. On the theory of oxidation-reduction reactions involving electron transfer. I. *J. Chem. Phys.*, 1956, **24**, 966-978.
46. Marcus, R. A. Electron transfer reactions in chemistry: theory and experiment (Nobel lecture). *Angew. Chem. Int. Ed.*, 1993, **32**, 1111-1121.
47. Sakanoue, K., Motoda, M., Sugimoto, M. & Sakaki, S. A molecular orbital study on the hole transport property of organic amine compounds. *J. Phys. Chem. A*, 1999 **103**, 5551-5556.
48. Vaissier, V., Barnes, P., Kirkpatrick, J. & Nelson. J. Influence of polar medium on the reorganization energy of charge transfer between dyes in a dye sensitized film. *Phys. Chem. Chem. Phys.*, 2013, **15**, 4804-4814.
